# Supplementary material
Source: publisher figshare collection journal article supplement (https://gsajournals.figshare.com/articles/dataset/_/13315181)
Supplement: Supplementary file 1 [file 1]

## Sheet: README
	README
0	Double dark biome contigs for each dataset. Additionally the fasta for each contig and normalized coverage for each sample is present

## Sheet: OurStudyALSblood
	contig	length	fasta	LP00204_GT17-03006_AGCGATAG-ACGTCCTG_S20_L005	LP00221_GT17-02971_TAATGCGC-TAAGATTA_S25_L007	LP0R137_GT17-02977_CGGCTATG-GCCTCTAT_S3_L001	LP0R175_GT17-03024_CGCTCATT-AGGCTATA_S20_L005	LP0R174_GT17-03020_ATTACTCG-ACGTCCTG_S14_L004	LP00034_GT17-02937_CGCTCATT-TAAGATTA_S17_L005	LP00025_GT17-02942_GAGATTCC-ACGTCCTG_S23_L006	LP0R168_GT17-02996_TCTCGCGC-AGGATAGG_S11_L003	LP0R120_GT17-02965_CTGAAGCT-TCAGAGCC_S21_L006	LP00275_GT17-02998_AGCGATAG-AGGATAGG_S12_L003	LP00239_GT17-03026_GAGATTCC-AGGCTATA_S17_L005	LP00273_GT17-02994_AGCGATAG-AGGCTATA_S8_L002	LP00140_GT17-02938_GAGATTCC-CTTCGCCT_S20_L005	LP00301_GT17-03019_TCCGGAGA-TAAGATTA_S29_L008	LP0R171_GT17-03008_ATTACTCG-AGGCTATA_S23_L006	LP00306_GT17-02928_CGCTCATT-AGGCTATA_S11_L003	LP00260_GT17-03011_TCCGGAGA-GCCTCTAT_S24_L006	LP00274_GT17-02999_AGCGATAG-TCAGAGCC_S10_L003	LP00303_GT17-03023_TCCGGAGA-GTCAGTAC_S16_L004	LP00087_GT17-02943_GAGATTCC-GTCAGTAC_S24_L006	LP00311_GT17-02912_ATTACTCG-AGGCTATA_S1_L001	LP00171_GT17-02923_TCCGGAGA-TAAGATTA_S5_L002	LP00312_GT17-02940_CGCTCATT-ACGTCCTG_S21_L006	LP0R115_GT17-03013_ATTACTCG-TCAGAGCC_S25_L007	LP00270_GT17-02995_AGCGATAG-GCCTCTAT_S7_L002	LP00282_GT17-03010_TCCGGAGA-AGGCTATA_S21_L006	LP0R166_GT17-02988_CGGCTATG-ACGTCCTG_S4_L001	LP0R124_GT17-03017_ATTACTCG-TAAGATTA_S30_L008	LP0R048_GT17-02997_TCTCGCGC-TCAGAGCC_S9_L003	LP00045_GT17-02919_TCCGGAGA-TCAGAGCC_S2_L001	LP0R038_GT17-02993_TCTCGCGC-GCCTCTAT_S6_L002	LP00104_GT17-02927_TCCGGAGA-GTCAGTAC_S7_L002	LP00017_GT17-02941_CGCTCATT-GTCAGTAC_S22_L006	LP00192_GT17-02986_TCCGCGAA-CTTCGCCT_S12_L003	LP00100_GT17-02917_ATTACTCG-TCAGAGCC_S3_L001	LP0R170_GT17-03004_TCTCGCGC-ACGTCCTG_S17_L005	LP00314_GT17-02956_ATTCAGAA-ACGTCCTG_S18_L005	LP00307_GT17-02944_ATTCAGAA-AGGCTATA_S9_L003	LP00296_GT17-03027_GAGATTCC-GCCTCTAT_S19_L005	LP00131_GT17-02955_GAATTCGT-TAAGATTA_S13_L004	LP0R106_GT17-03009_ATTACTCG-GCCTCTAT_S22_L006	LP00041_GT17-02982_TCCGCGAA-AGGATAGG_S6_L002	LP00236_GT17-02975_TAATGCGC-GTCAGTAC_S29_L008	LP00308_GT17-02924_ATTACTCG-ACGTCCTG_S8_L002	LP00313_GT17-02916_ATTACTCG-AGGATAGG_S1_L001	LP00251_GT17-02983_TCCGCGAA-TCAGAGCC_S5_L002
0	NODE_31146_length_1836_cov_16.6508_g27043_i0	1836	GCACTCTGAGTGCCGTTGGGTTGCATGTAGTTGATCGTGAAACAGTTTTCTGCATAGGGGACAGGGAACGCGTGCGCTTGATGCTCAGGGTTCCAATTGGCCAAGGGCATCTCGATGTGGCTGACGTACTCTTGGGGAAGTGCTGCGACTGAAGCAAAGGTTGCACTGTTGAGGATTCCGTCATCTTGCGCCTGCTCTGAAGCAATGGCGGCGATGCAAATGTCACCCTGTGTGGTCGTGGCGGGGCTATCGGGCCAGACGGACAGGATGATAGATGTGTTGCGATAACGAGACCCTGCGTTGAGGGCAGTGTCTACTTTGATAAGCTGTGCAGCAGCATGATTTGCTCCGGAAGCCGAACCCAAAGGAGCGGTGATGGTGGCGGTTCCTGCTTGGACG…	0.346155	0	0	0.204204	0.0509334	0	0	0.0580064	0	0.117464	0	0.491732	0	0	0.350897	0	0	0.655292	0	0	0	0	0	0	0	0.373926	0.715002	0	0	0	0	0	0	0.520758	0	0.0969244	0	0	0	0	0	1.02965	0	0	0	0
1	NODE_208299_length_613_cov_5.60215_g192620_i0	613	CAAAGAAGGAGGCAGCAAAGGAGGAGCCAGCCAAGGAGGAGCCAAGGCACCGGCAGACACCACGCCGAAGACTGCTGCGCCAGAGGAGCCAGCGAAGGAGACGCCGGCGGCCAGCGCCACCGACGCTTACGCTGCACCGAAGACTGCTGCGCCGGAGACGCCCGCGGCTAGCACAACTGAGACGCCGGCGGCCAGCACAGCCGACGCTTCCGCCGCGCCGAAGACTGCTGCGCCAGAGACGCCGGCGGCTACCACAACCGAGACGCCGGCGGCCAGCACAACCGACGCTTACGCCGCACCGAAGACTGCCGAGCCGGAGACACCGGCGGCCGGAACAACTGATGCCTACCCAGGGCAGAAGCCGAGGAAGATCGGTCATTTACCTCTGCCATACCTGTA…	0	0	0	0	0	0	0	0	0	0	0	0	0	0	0	0	0	0	0	0	0	0	0	0	0	0	0	0	0	0	0	0	0	0	0	0	0	0	0	0	0	0	0	0	0	0
2	NODE_252269_length_538_cov_4.7205_g235764_i0	538	GTGTGTTTAGCTCTCTGAAATTTATTGTTTATCATCTTTGAGAGTTAATTCAAACAAGTTGATTGGTGTTGGAAACGAGTAAAATCTTTCATATCTAAAGTGGTACAAAAGAGAAGCATGTTTTGACTGTTGCTAGACTTTAATATGTCATGCTAGATGTTATTCTTCATGTGCTTAGTATTATGTTGTAGCATGACTTGTATTAAATGATTGAGAGTGCATAATGTGTCATTGGAATAATCATGGTTGCATTCAACAATAAGACATGTTGTAGTTTTCTCTTCTATTTGTTTATTTGAGTTGACTTGGCACATGCTTACACCATGTTATGACTTAAACCATGTCAACTATTGCCTCCATGATCATTTAGTTTGAGGTTTACAATATGTCTTATGTGTT…	0	0	0	0	0	0	0	0	0	0	0	0	0	0	0	0	0	0	0	0	0	0	0	0	0	0	0	0	0	0	0	0	0	0	0	0	0	0	0	0	0	0	0	0	0	0
3	NODE_263421_length_522_cov_4.88009_g246790_i0	522	TAAACCCCACACCGCGGTGCTGTTAGTGGCAAGCGTGGCACACTTCACACAGAAGAAGGCGGAAAACAGGGAGGCTGTGTTGAGCATCCGGCTTGCTTCCTGTGACCAATCAGGCCCATGGGGAAAACGGGCTTCCTAGAAATACCGGGCAACAATGACTGGGGGCAAGATGCTGTTTTATGCAGCGACCAATTTAACAGTTAAAAATGATATTTTATGTGGTAGCACCGGGGTGCAATGTCTGACAACCTTGTGACTCTCGTTAGAGTCGCTGTAGATGAAGCTGCTGAGAGTCACTGAATAACTTTTCTTATAAAAATTCAGGGCAACATCACAGTTAGAGATGGACAATTAAGAACAGATTGTTGTTTTGGACTGCTTCAATTTAAGCTTTCCCTA…	0.181059	0	0	0	0	0	0	0	0	0	0	0.222107	0	0	0	0	0	0	0	0	0	0	0	0	0.275296	0	0	0	0.616182	0	0	0	0	0	0	0	0	0	0	0	0	0	0	0	0	0
4	NODE_374738_length_408_cov_5.15297_g357359_i0	408	GCAACAGCCCTTACGTCAAGGAAGTCTGGCCCTGCCGCTGCGCCACCCAGCAAGAGCTCTCAGGCCAGTTCTATGCCGGATTCCAGCGTGTCGGTTTCTACCGGTGACCTGCCAAGCCCCCCGGCGCCATTGGCTGCGGTATCCCCTATCGCCGATGGGCCCGCCGAGGATCAGGCCGATGCTGATAACTCGAACTCGGCTGCTCTTGGGTACAGTGCCACCGTCGCTATTGTTGCTGGTGCCATTGTTGCCGCTTTCATCTTCGCTTGAACCATTTTCGGGCGGACAACGACGAGAGGAATAAGGAAAACCTTGGCCGTGTGTTCTGGGTTGTCACTCATATCAGGAGGGAGCGATTGACAATTTTCTTGGTTTTTCTCAACTCATTTGCTTATGCAA…	0	0	0	0	0	0	0	0	0	0	0	0	0	0	0	0	0	0	0	0	0	0	0	0	0	0	0	0	0	0	0	0	0	0	0	0	0	0	0	0	0	0	0	0	0	0
5	NODE_375944_length_407_cov_5.91193_g358565_i0	407	CTTCCGATCTAGGCCACCGGCCTCGGCAGCAACTAGGCGGCGCACACGCGCGCGGCGTGTGTGCGTGGCTCTGCCCTGATCCCGTCACTGGCCTTGGGCTGATCCACGCATGCAGCTAGACGCCTACGTGCGTCGATCGATCTATAGATGACGCGAGGCTGAAACGATCAGCCGACGCATCTATATAAACCCATATATTTGATTGTTTTGCTTCCAACTACTACTTGTTAGTTGTTACTACTACTGAAACTAGCTAGGGTGGGTTGATTCTCGCTTGTGGACTCACCTGAGAATCGACACGTTCTGGTTGAATTTATCTCGTCCCGCTATATAAGGCGCGACATGATATTTATTAACAAGTCCACTTAATTTATGAAAATGTACTTTCTCCGGCCTGGT…	0	0	0	0	0	0	0	0	0	0	0	0	0	0	0	0	0	0	0	0	0	0	0	0	0	0	0	0	0	0	0	0	0	0	0	0	0	0	0	0	0	0	0	0	0	0
6	NODE_376530_length_406_cov_13.6097_g359150_i0	406	GAAAACTGTTTCACGATCAACTACATGCAACCCAACGGCACTCAGAGTGCTGGAGGGTTCGGTGTTTGTGCGATTGTGAACGGAGCTGCTGTGGGACAAACGTTCCGCTACAGGATCGAGTACAAGTATGAGACCACCGCCCCTCTCAGTTTTATGACTGGGCAGGAGTATCAAGCTGCTACCGAGCCTGTGCCAACCTCAGCCCTCGTTCCCCACCTCGCCGCTCTCAAACCAATGAGTACCATCAAAGCCCCCGCGAAGCACCTCACAGCTATTCCCCTCCATGCCATGGGCACTGCCCAACCCGGTCTTCTGGCCAAAATCAAGAACACCGGTCCTTCCATTGGAAGTGTCATTGGCAAAGCCGCTGCCACCGCAGTTTCCGCCGGTATCAAGCAA…	0.276781	0	0	0	0	0	0	0	0	0	0	0.464678	0	0	0.232807	0	0	0.378744	0	0	0	0	0	0	0	0.214231	1.01105	0	0	0	0	0	0	0.469253	0	0.204862	0	0	0	0	0	0.382014	0	0	0	0
7	NODE_428581_length_370_cov_11.5143_g411171_i0	370	CTAAAGGCACACACTGCACAAAAACGGTATAGTTTTCCTCAGTGTGTTTGTGACGCCTCCCCACTGTACTCAACGCCGACAGACAGCACTACAGGTAGTCCAGCCCGCCGACGCCAAGCAAATGAGGGTCGCCCAGCCTAAAGGCACACACTGCACAAAAACGGTATAGTTTTCCTCAGTCTCCCGCGCAACATCCTCGCCAGCCTTAACACACTCAAGAGAGTGCTACCTTTCTGACGGCTTTTCTTGCACGGAAAACCGATGTTGACCTGCCACTCACACAAGTGCACTGGCCGCGCACCCTAGACCGAGCACCTGTCGCTTGCGCTGACGAAACACCCGGACAAAGCACGCCACCAATTGATTGCAT	0	0	0	0.169143	0	0	0	0.287837	0	0	0	0	0	0	0	0	0	0	0	0	0	0	0	0	0	0.150735	0.804056	0	0	0	0	0	0	0.125549	0	0	0	0	0	0	0	1.10435	0	0	0	0
8	NODE_429579_length_370_cov_2.33016_g412169_i0	370	GTAGGTTTCATAGCATTCATATATGCATTTGAATGTTTCAATTGTACACACTCCGTCTTTTGGACAGACTTCGAGCAAACATGTGATTGCTCGGACGTATTGTAAATAGCATTTTCTTTGGTTTCTAAATGAGTAAAATCGTTGTTAATAGTAGACATAAGTGTTAAAGAATTGCCAGACTACAGCCTATAATGATTCGAATCTGCAGGATTATGGTCGATATCCTGTTATTCCAGCTACTGATGGTCGCAAAATTATGCGGTGGGCATCAGTGAAATCGCTTAAAGTGTCTCTTTTCTTTATGAGAGGTCGGCAGACATTTTACTAACCTATTGGGGGTCCATGTTCGTTAGGTCGCACCCCAGTTTAG	0	0	0	0	0	0	0	0	0	0	0	0	0	0	0	0	0	0	0	0	0	0	0	0	0	0	0	0	0	0	0	0	0	0	0	0	0	0	0	0	0	0.565644	0	0	0	0
9	NODE_464342_length_350_cov_3.67119_g446928_i0	350	TATCTTATGATACTTCTTCTTGTTGATGGTTTCCCCAGAAAGCATGGTTATCACACAGCAAGGAACTTATAAAAACTACATAAGATTGCACATTATTCAACACAATAGTTTTTGGCTACTTTCCCATGAGCTATAATTTTACACAAATCAAGGAGTTAATTTGAAGGTTTTAAAGGTAGCACATAAGCAAATTACTATGGAGTGGCGGTGAAATACCACATGTAGGTAGGTATGTGTACACAATTGGCAAAACTTGGTTTATTGGTGGTTGGATGCACGAGTAGAGCTCATACTCAGTACAAATGGAGTCTAGCAAAAGACTGGGAGCGACTAAATAAGAGAGCAATAAG	0	0	0	0	0	0	0	0	0	0	0	0	0	0	0	0	0	0	0	0	0	0	0	0	0	0	0	0	0	0	0	0	0	0	0	0	0	0	0	0	0	0	0	0	0	0
10	NODE_495611_length_334_cov_4.03584_g478197_i0	334	TGCTTTGACAGTCTGAAAAGATCATCCAAAAAGAAAACTTAGCTTAAGGGCAAAAAGATTCTGGATATCTTGATGGATCAGTAAATGTCGAATTCGAAGGAGACAGAAGATGAGATGTTTAAAATAGTGGATGCTGAAAAGCAGAAATGAAAAACTGTATCTGGAACGGACATCATTTGAGGCAGGTCTTTCTATGGAGAGGCTGGCAGAAATGATAGAATTGTACAAGTGATTTGCGAGAGTCATTTGAAACAAGGAAAGTGGAAGTAAATGAAATTTGATGTTTTTAATGGCTATGGCTGTTAAAAATTGAAACCGGAGAACCAAATCGAAC	0	0	0	0	0	0	0	0	0	0	0	0	0	0	0	0	0	0	0	0	0	0	0	0	0	0	0	0	0	0	0	0	0.240803	0	0	0	0	0	0	0	0	0	0	0	0	0
11	NODE_569375_length_302_cov_5.10526_g551961_i0	302	CCGTCTACAAGCACACTGCTCATACATCTCCAAGCCTTGTGGCATACACTTTTATATTTTCCTCAGTCCATCTGATGTCTTCACCCAAAAGTCTAAACGCCCAACTGAGTTGCCCCAGTCAGGTTACCTTTCTCTCAGGCTATCCCCACCAAAAAACAAACTGATGCTGACTTGTCCTTCCTCACAAGTGCACTCAGTAAGGCCCCATAAATGCAGCAGCCCCCTTGTCGGGAAAACCACCATCCATACAAAACCCCAAACTAAATTGATTGCAAGGTCAACACTTCTGACTTCAATAGATC	0	0	0	0	0	0	0	0	0	0	0	0	0	0	0	0	0	0	0	0	0	0	0	0	0	0	0	0	0	0	0	0	0	0	0	0	0	0	0	0	0	0.22069	0	0	0	0
12	NODE_580288_length_298_cov_3.86831_g562874_i0	298	GGAAGCTAAAAAGGCAGATGAAAACACAAACCCTCCAACAAACACGAAGAAGAGCAAGAAGGCTAAGAAAGTAGTTGAATCCACTAGCGAAGAAGAAGAATCAGACATACCAACTTCACAGGTTGAAGATTTCTCCGTCAATGTATCAGACATCGACCTGGAATCATTAACTTCGGATAACAGCAGTCGCGATTCATCGAATCTTTCTATTACATCCAACTTTGCAAATGAAGTTTTTGATAAATTAGAACTACTTAGAAATCAACAACAACCTCTTGAGCCAGACGCAGTGGAAGAG	0	0	0	0	0.221137	0	0	0	0	0	0	0	0	0	0	0	0	0	0	0	0	0	0	0	0	0	0.597359	0	0	0	0	0	0	0	0	0	0	0	0	0	0	0.246644	0	0	0	0
13	NODE_592678_length_293_cov_8.59664_g575264_i0	293	CCACAAACAAACAAACAGACAAGAAGAAGAAAGGAAAGCCAGATTCAAAGAAGGCTGTCCAATCTGAACCCGTCAAAACCACCAAGCCCAAGCGCATCCACGGCTCTCTTACCAGTGCGCTCGCGGCTTACCAGATACCCGTGAATCCCCAAGGAACACTCCGCCATTACCTCGACCATTATGGGGTACCTACCACACCGTTGGAGGACTGGCACGATCCCAATCCACGCGGCCATCCGGTGGCCCACACGCTTCGCCTCTGGAGCGTTGTCCAAATCCTGCGTGACCTCACA	0.391146	0	0	0.243259	0	0	0	0	0	0	0	0.266921	0	0	0	0	0	0	0	0	0	0	0	0	0	0.224339	0.371744	0	0	0	0	0	0	0	0	0.723977	0	0	0	0	0	0.795077	0	0	0	0
14	NODE_604332_length_289_cov_8.27778_g586918_i0	289	CTGCTGCCGAGAGGAGGCGTTGTTGGCACCGAGCGGCGACGGGGAGGGCGCCTGCTTCGCGCTCGCGCTACGGCGGAGATCCGGCGCGTCGCCGTCCGCTGCCGCCGGTGAGGCCATGCGCTGAAGACTATTCACCTTCATTTCGTAGTCGAGACGAGGAGGCGACAATGGATGTTATAAATGTGGCACCGCGCTCAGAGAAATGAATGAGGCGAAGGGCCCCATATATAGGCCCCAAATGGCCTGAAAATGCACAGCGACGAGTTGACCGGAGAGATCGGAAGAGCAC	0	0	0	0	0	0	0	0	0	0	0	0	0	0	0	0	0	0	0	0	0	0	0	0	0	0	0	0	0	0	0	0	0	0	0	0	0	0	0	0	0	0	0	0	0	0
15	NODE_629471_length_281_cov_5.33186_g612057_i0	281	GTAGATATCAGAGCAACGGTACGTACCGTTGCTCACATTTCCCTAATAATAACACTCCGTAGCAACATTCGGCGTACATATATAGAAGTGCGCACCAATGGCTTCCTCCTCCAACACCGTTGTCACCTTCGTCGCCGTCCTCTCGTTCGTCGCCGTGTCTGCCGGCGTCACGGCGTCGCCTTCCCCCACCGCGGCGCCTTCGACCGGCAGCCTCTTCCAGGAGACGTGCGAGAGCGCCGGCGTGGACGCGGTCCTGTGCGTAGAGCCGCTGTCGCCGGCGC	0	0	0	0	0	0	0	0	0	0	0	0	0	0	0	0	0	0	0	0	0	0	0	0	0	0	0	0	0	0	0	0	0	0	0	0	0	0	0	0	0	0	0	0	0	0
16	NODE_632722_length_280_cov_5.04889_g615308_i0	280	ATTAGAGCAACGGCTACGTTGCTCACATTTTCCCAATAATAATAATACTCCGCCGTAGCAACGTTCGGCGCACATATATATAAGTGCGCACCAATGGCTTCCTCCTCCAACACCGTCGTCACCTTCGTCGCCGCCGCCCTCTGCTTTGCCGCGGTGTCCGCCGGCGTCACGGCGTCGCCTGCCCCCGCCTTGGCGCCTTCGCCCGGCAGCTTCTTCCAGGCGACATGCGAGAGCGCCGGCGTGGACGCGGTCCTGTGCGTAGAGCCGCTGTCGCCGGCGC	0	0	0	0	0	0	0	0	0	0	0	0	0	0	0	0	0	0	0	0	0	0	0	0	0	0	0	0	0	0	0	0	0	0	0	0	0	0	0	0	0	0	0	0	0	0
17	NODE_649529_length_275_cov_4.10455_g632115_i0	275	GACTTATACCATGCCATTCAGTGCAAGTAGTAAGCCTGAATGAGTAGAAAGACGCGTTGATTTTTCAGAAGGTTCGATGTGAATCGGACTCAAAGAATCAATGGTGCAGATCTTGGTAGTAGTAGTAATTAGAAAAATGAAATCCTTTTTCAACTGATGAGAACAAGGTTATCTCAAAAATGGCAATCAGTTGAGAGTTAGTCGATCCTAAGCGGGGAGTTAAATACTTTAAAAAAGAGAGGGATTGGGATTTCGGTCTCGTAAGATGCCTCGAT	0	0	0	0	0	0	0	0	0	0	0	0	0	0	0	0	0	0	0	0	0	0	0	0	0	0	1.15867	0	0	0	0	0	0	0	0	0	0	0	0	0	0	0	0	0	0	0
18	NODE_656248_length_273_cov_4.33945_g638834_i0	273	GCCGTCTATAAACACTATGCTGAAAACCCCCTAGCCTTGCGGCATACACTCTTAGTTCCTCGGTCTAGCCGGTGTCTCGGTCTCAAGTCTAAGCGCTCAAATAAGTTGCCCTATTCAAGTTACCTTTCCCAAGACTTTACCCCACTCAAGCCAAACCGATGTTGACCTGTAACCATAACAAGTGCACTCAATCGAAAATCATACGCAGCAGCCTTCATGTAGAAAAACCACCAGCATACAACCCTCAGTTAAATTGATTGCCATGATCACACT	0	0	0	0	0	0	0	0	0	0	0	0	0	0	0.285291	0	0	0.387772	0	0	0	0	0	0	0	0	0	0	0	0	0	0	0	0	0	0	0	0	0	0	0	0	0	0	0	0
19	NODE_673783_length_268_cov_4.43192_g656369_i0	268	AGATAGCTTGCGCCGTCCTCATCGCCGCATCGGCCACCGTGGCATTCGCAACCGAGGCCCCAGCTCCGTCCCCCACGGGCGTCACCGCGGCGGCAACAGGTGCCTTCCCGGCCGTGGGCGCTGTGCTTGGCGCCTCCTTAGTCTCTTTCTTCGCCTACTACCTGCAGTAAGGGACGTGGAGGAGGAAAGAGGACGACTATTGCTGCTGCCATTTTCTTATGATATGAGTACCCTCTGATGTTTTGTTTCAAACTGGAGATCGGAAGAG	0	0	0	0	0	0	0	0	0	0	0	0	0	0	0	0	0	0	0	0	0	0	0	0	0	0	0	0	0	0	0	0	0	0	0	0	0	0	0	0	0	0	0	0	0	0
20	NODE_683786_length_265_cov_6.68571_g666372_i0	265	CTCTTCCGATCTGCATCCCATCCCAGGCACGGTCGTCTTCAGTGTGGAACTGCTTTAGGACAATGCTATGCTCGTAGTATGTCTGTCTATTCTGTACTGCACCATCCCTATGGGTCCCCACGCGAGGAGTGCGTCTGACTTAGAGGCCTTCAGTCGTTAGCACACGGAGGGTAGAGTTGGCCCAGTGTCCGCTCGGACAAGGCCAAGACCAGAGCTCCGGAAACAGTGTTCCTCTCGTACTAACTGTGACTTCTCTGCGGGGCGC	0	0	0	0.253656	0	0	0	0	0	0.40263	0	0	0	0	0	0	0	0	0	0	0	0	0	0	0	0	0.352744	0	0.493013	0	0	0	0	0	0	0	0	0	0	0	0	0.300864	0	0	0	0
21	NODE_686133_length_264_cov_11.9617_g668719_i0	264	CAGCATCTAATCCCAGGCACAGTCGTCTCCCGTGTGGTCTTGGTTAGAGCGCTGCATTTGCACGCGGCAGCTGCCCCCCTTGCGAGGAACAGTATTCTCTGCACGCAGCACCCCTAATCTCCCCTAGCGAGAAATGCGTCTGACTTAGAGGCCTTCAGTCGTTAGCACACGGAGGGTAGCGTTGGCCCATTGTCCGCTCGGACAAGGCCCGGACCAGAGCTCCGGAAACAGTGTTCCTCTCGTACTAACTGTGACTTCTCTAAG	0	0	0	0	0.330445	0	0	0	0	0	0	0.670442	0	0	0	0	0	0	0	0	0	0	0	0	0	0.50551	0.855949	0	0	0	0	0	0	0.262825	0	0.188054	0	0	0	0	0	1.59024	0	0	0	0
22	NODE_708136_length_259_cov_3.21569_g690722_i0	259	CTCGCGACGAGGCAACGCGGCGGCTTCTTGAAGAGAAACCCTCACCAGCAAGGTGTCCTCCACGCGACAAGAACGACCGGCTCAGACGACCAACCTGCTCAGTGAAGCCTGACTGGAGGTGCGCCCAATTCAACTAATCGTAACCCGTCGGCTTGCGCCAGCGAACTGATTAGAACCGACCGTTCACGCGCAGACACCTCACCACATATGGCGAGCCACCGGCTGTGATTCCTTAGGTAGGCATTGCGAGATTCCCGAG	0.632133	0	0	0	0	0	0	0	0	0	0	0	0	0	0	0	0	0	0	0	0	0	0	0	0	0	0	0	0	0	0	0	0	0.297413	0	0	0	0	0	0	0	0	0	0	0	0
23	NODE_772439_length_244_cov_3.13228_g755025_i0	244	ATAAATTTCAGAGAGCTAAGAACACATATATGGTCCATAATATAATTTAGCTCAACTCAAAATATAAGTGAAGAACAAGAGCTAAACGCAGTACTAGCAAACTATAAACACTCGAAGAGTAATGCAATGAAACTAGAGTGTTCTAGGCAATGAATTGGAGCGTGTCTCTCTCCCAAACAAGCGATGCTAAATCCAGTTGAATACTATAGCACACTAAACAAATATGAGGAAAACTAAAACAAAG	0	0	0	0	0	0	0	0	0	0	0	0	0	0	0	0	0	0	0	0	0	0	0	0	0	0	0	0	0	0	0	0	0	0	0	0	0	0	0	0	0	0	0	0	0	0
24	NODE_791652_length_240_cov_3.27568_g774238_i0	240	CGCGCCCTCTGTTGGCGCTAGACACACCACCTGAGCGAGGATAGGGTGGGGAGGACCTTATTCTGCCATCGGGACGTAGCCATCGACTCACCATCCCGAAGAAGGCACTGAAAAGCAAACTAAACAAAGAACTGAAATCCCCCACCAGAGGCCGTGGTCCACAGCGCCTCCGAGGCCCTAAGGCCACCGGAGACGTAGCGGACCGGCGGCGTCGCCGACGAGGGAGATGAAACCCAGATC	0	0	0	0	0	0	0	0	0	0	0	0	0	0	0	0	0	0	0	0	0	0	0	0	0	0	0	0	0	0	0	0	0	0	0	0	0	0	0	0	0	0	0	0	0	0
25	NODE_792044_length_240_cov_1.90811_g774630_i0	240	CTTTGGATCCCTCCCACCGGAGAGGATCTTGGAATTAATGAATCAAAAATTTCACGATACTATCCCAGAGGAACTCAACATTCCAATGGATAATTCTACCCCAGATGGTGAAAGGATCATGGAAAGCATATCAGAGGAATCAACCGGAAAGGAGACTTTGTCTCCTCCTCCGGTCTCTTCTTGAAAATTTCCAATCCTTTTCATGGTTTCTCGTATCATTCGCGCAAGTTTAAATATTGA	0	0	0	0	0	0	0	0	0	0	0	0	0	0	0	0	0	0	0	0	0	0	0	0	0	0	0	0	0	0	0	0	0	0	0	0	0	0	0	0	0	0	0	0	0	0
26	NODE_807366_length_237_cov_1.24176_g789952_i0	237	CCGGGAGGCACGAAGGAGCAGAAGATCAACAGACCTGAACTCAAACTTCACCCAGATGACAAACCAACAGAGACAACCCACCGATGAAGGTCAGGCAACAGAATGCTCCAGAGCGGGGAAACCCCACACAAGAGACCCAAAGTTCAAGCCTCAGCCCAGCCACCGACCAGCAGAACGGCCCCGGACAGGCCACTCAACTCCTCTGAGCCACAGTTTCCCCAACGGGCGCACCACCAT	0	0	0	0	0	0	0	0	1.09629	0	0	0	0	0	0	0	0	0	0	0	0	0	0	0	0	0	0	0	0	0	0	0	0	0	0	0	0	0	0	0	0	0	0	0	0	0
27	NODE_821794_length_234_cov_3.92737_g804380_i0	234	GTAGAGAAGAAATCCAAAGTGCCGAGAAGAAATCTGAAGTCACCTCGGAGAAGAAATCCAAAACCAAGAGTAAGGAAGAAGGCGCAGAGAAGAAACCCAAGAGCAAGAGCGAGCCCTCTTCCGACACCGAGAAGAAACCCAAGAACAAGCCTGATGGCGCTGAGAAGAAACCTAAGAGCAAGAACGACGGCTACGCTGGCGTGGAGAAGAAATCAAAAACATCCAAGGGTGCTG	0	0	0	0	0	0	0	0	0	0	0	0	0	0	0	0	0	0	0	0	0	0	0	0	0	0	0	0	0	0	0	0	0	0	0	0	0	0	0	0	0	0	0	0	0	0
28	NODE_848816_length_229_cov_2.02874_g831402_i0	229	CTCTCCGGGTCTCCCCGTCGAGGTGGTCCGCCGTTCTCCGATCGACCCGGCCCCTCAGGTGACCTCACCACGTCGTCGGGGTGCGTCGCGGTACGAGACCGCGTCGTCCCCGGCACCACGGTGACGTGCCGCGTCCCCCGGGCCGTCGTGCCGGTACGAGACCGGTCCGTCGTCCTGGCGTCTGCGGCCCGCGCCCTCCGGGTCTCCCCGTCCGGTGCGGCGTCCGTCC	0	0	0	0	0	0	0	0	0	0	0	0	0	0	0	0	0	0	0	0	0	0	0	0	0	0	0	0	0	0	0	0	0	0	0	0	0	0	0	0	0	0	0	0	0	0
29	NODE_874975_length_224_cov_2.99408_g857561_i0	224	GCGTTGTGGGAGTCACATCCTGGGGGTTGGTCGCCGGATTTGGTGGAGCGGGCGTTGGCTCATGTGGCCTCGCTTGGTGGAAAGTAGCTGGTCACGGTCACAGTTTGCGTTACCCGTTACCCCTTGTGTAGAGTAGGTCCCAGGCACCACGGAGACGGCCTCAAACAGTCCCCAAGGACACCCCTTCAGAAAGGAAACAGTCATCATGACTAACCCGTTCGGAC	0	0	0	0	0	0	0	0	0	0	0	0	0	0	0	0	0	0	0	0	0	0	0	0	0	0	0	0	0	0	0	0	0	0	0	0	0	0	0	0	0	0	0	0	0	0
30	NODE_880721_length_223_cov_2.4881_g863307_i0	223	ATTACTCGTCACATCTGGAAAGAATCTTAAAGGCGAAACTTGGTTAAGTTTATCAGGAGTAATATTTAACAGGTAGTTGAACTCTTAACTATCTCACTTATTAACTCAGGATAGATAAGACTCTGTGAACTTTTAACTTTGATTTGGATGAAGTCGAAATATAGGAGTGGCACGGGAACGTGCTGCTGAATAATATAACACTTAAATCCCAGATCGGAAGAGC	1.57515	0	0	0	0	0	0	0	0	0	0	0	0	0	0	0	0	0	0	0	0	0	0	0	0	0	0	0	0	0	0	0	0	0	0	0	0	0	0	0	0	0	0	0	0	0
31	NODE_915456_length_217_cov_1.48765_g898042_i0	217	ATGAAGGAGGCCGCGGACGCCGACTCGGCCGAAAAGGCTGCCATAGCGAAGAAAGCTGCCGGTGAGAGCATAGCCGCCGCCATTTTGTCCTCCATCCGGGGTGTTGGACAAACGGCTAGTGCTGAAGCAGATGCCGCTCCCAAGCTTGCCCATGCCATCATGTCTGACCCCGCGTCCAAGGCCTACTTTGACGCAGCTAAAAAGGACATAAAGGAGG	0	0	0	0	0	0	0	0	0	0	0	0	0	0	0	0	0	0	0	0	0	0	0	0	0	0	0	0	0	0	0	0	0	0	0	0	0	0	0	0	0	0	0	0	0	0
32	NODE_946946_length_212_cov_2.00637_g929532_i0	212	ACCTCATAGTCAAAGGACTAAGTGACTACGCTTCTAACTATTGCTACCGCAATACTTAAGTGGGTATGTCCATCACATCATTCATCTAATGATATGACCTCTTTGTCAATTGATATAAATATCCATGATCGGGAAACCTCGATCATCGGTTGACCAAAGAGCTAGTTGAATAGAGGCTTACTAGGGACTCTGTTTGTCTTACATCACACCTG	0	0	0	0	0	0	0	0	0	0	0	0	0	0	0	0	0	0	0	0	0	0	0	0	0	0	0	0	0	0	0	0	0	0	0	0	0	0	0	0	0	0	0	0	0	0
33	NODE_968288_length_209_cov_1.96104_g950874_i0	209	ACTTCCTAACATCTCTCTGTTTTCCAAACAAAAAGCTCTAGCACATAAGTATTCTTGCTACCCTTTACATGGGGCCTTTCTTTTACTTTATACATTGAGTCTCCATCTTCTTTCTTTATGCATTAACTAGGAGAGCAATTCTTGTCATTCTTAGTTCTATGTGCATGGTACCAAAATTATTGTTAATGAATGCATGAGTTGTATTGTTT	0	0	0	0	0	0	0	0	0	0	0	0	0	0	0	0	0	0	0	0	0	0	0	0	0	0	0	0	0	0	0	0	0	0	0	0	0	0	0	0	0	0	0	0	0	0
34	NODE_968299_length_209_cov_1.93506_g950885_i0	209	CCCGGCGTTGCTTTCTTCTCGCTGGCATAGGCGTCAGGGCCGACACCCATAGTGTAGGGCTTGTTGGCGCCATTGATCTTCCTATCCCTGATTTCCTCGGGGGTCAACGCCGGCACGAGCGGCACGGCGGCGGCTAGGACGATGAGGAGGAGAAGCAGCACCGGAGCGAGCTGCGCCCTCATCGTGATCATCCCGACAGGGTGGTGGTG	0	0	0	0	0	0	0	0	0	0	0	0	0	0	0	0	0	0	0	0	0	0	0	0	0	0	0	0	0	0	0	0	0	0	0	0	0	0	0	0	0	0	0	0	0	0
35	NODE_991697_length_205_cov_11.4267_g974283_i0	205	GCCGACGCCGACGCCACTTCTGATGCCGGATCCAAGACCGAGGACAAGGACGCCAAGGCGGCCGCCGATGCGAGGAAGGCTGCCGGTGACAGCATTGCCGCTGGAATCTTGTACGGCGGCAAGGGTGCTGCAGCCGCTGCACCTACGGCTGCCGACGCCGACGCCACTTCTGATGCCGGATCCAAGACCGAGGACAAGGACGCCA	0	0	0	0	0	0	0	0	0	0	0	0	0	0	0	0	0	0	0	0	0	0	0	0	0	0	0	0	0	0	0	0	0	0	0	0	0	0	0	0	0	0	0	0	0	0
36	NODE_1016417_length_202_cov_3.7483_g999003_i0	202	CTACAACAACCCCGAAAATCGAGACTCTAAACTGGGACATTCTTGACGAAGAAGAATGGTGCTTAAACAGGATCCAGAACTCAAAGCTTGTAGCTTTGTCAAATATGGCTCCGCGAAAACACACCACGACTAATGCAACAACAAGCAAGGAAGCTAAAAAGGCAGATGAAAACACAAACCCTCCAACAAACACGAAGAAGAG	0	0	0	0	0	0	0	0	0	0	0	0.404148	0	0	0	0	0	0	0	0	0	0	0	0	0	1.33119	0	0	0	0	0	0	0	0	0	0	0	0	0	0	0	0	0	0	0	0
37	NODE_1029670_length_200_cov_4.4_g1012256_i0	200	CATAATTTTAGAATAAATCTATTCCACCATGAAGGGGACAAATGTACAGCCCGCCTAAAATGGTAGGGGTTACACCTGTTCGTGGAACTTAAACCTGCGCCTCAACGACACTAGGCTGAAGACAGCCATGCAACACCTAACTTGTGCGCAATCCACCGCCGCACACTGATGTATGCTTTCGCATACAACGTCGTTACGGC	0	0	0	0	0	0	0	0	0	0	0	0	0	0	0	0	0	0	0	0	0	0	0	0	0	0	0	0	0	0	0	0	0	0	0	0	0	0	0	0	0	0	0	0	0	0
38	NODE_1031777_length_200_cov_2.52414_g1014363_i0	200	GTCGTGTGGTCGCGCGGGATCTGGGCGGTGTCGCGGAACTCGGCATACGCCATGCCGCTGCCCGCGACGTGCCAAACGTCTGCGGTCACTAGCTGGAGGCGGCCGTTAATGCCGCACACGAGGTCCTTGTTATTGGTGATAACACCGTCGAGGGACGCGTTCAGAACCTCCCAACCCAACTCGGTCAAAGCATCGCGAAA	0.416748	0	0	0	0	0	0	0	0	0	0	0	0	0	2.15883	0	0	0	0	0	0	0	0	0	0	0	0	0	0	0	0	0	0	0	0	0	0	0	0	0	0	0	0	0	0	0
39	NODE_1034004_length_199_cov_7.77778_g1016590_i0	199	GCTCGTTGGACTTCTCATTGCTGGCCTCCTTGGAGGTCACCACGCAGACGGTAGCGACGACGGCCACCACGAGGATGGACGACGCGCCGATTATTGCACCTTTGCTCATGGCGGACGAACCACGATTGATCAACACCTCCCGATCGGTTGAAAGGGGAAGTGTTTAGGAGGTGTGAGCCCCTCGACCAATGGAAGGGAG	0	0	0	0	0	0	0	0	0	0	0	0	0	0	0	0	0	0	0	0	0	0	0	0	0	0	0	0	0	0	0	0	0	0	0	0	0	0	0	0	0	0	0	0	0	0
40	NODE_1039811_length_199_cov_2.75694_g1022397_i0	199	CGACTCTGTGACCCAGTCTTTCAGTTTACCAAACGCCAAATACGGGGGTTTCACCCTCTATGCCCTCCTGTTCCAAGGAAGTTATGCGTCCGGTTCCCCTTTAGAGCTAAGTCTTGAGCTTACAACTCGACGCACAAAGTACGCAGATTTACAGCTTGAACTTTTACCTGTTCGTTCGCCACTACTAAGGTAATCTCAG	1.06207	0	0	0	0	0	0	0	0	0	0	0	0	0	0	0	0	0	0	0	0	0	0	0	0	0	0	0	0	0	0	0	0	0	0	0	0	0	0	0	0	0	0	0	0	0
41	NODE_1039984_length_199_cov_2.61111_g1022570_i0	199	CTTGACGGTCCTTTTTGTAGCAGAATTCTGACTCCGACGGTGACTTCTCCAATTATTAGCAAACATGCAAAATTAATAGAAATAACATAAGTATCACTTCTAAACATGAAATATATCAATGAATAACAGTAAATTATGATATAAAATAGTGATGCAAAATGGCCGTATCAAGCCCCCCAAGCTTAAACCTCACTTGTCC	0	0	0	0	0	0	0	0	0	0	0	0	0	0	0	0	0	0	0	0	0	0	0	0	0	0	0	0	0	0	0	0	0	0	0	0	0	0	0	0	0	0	0	0	0	0
42	NODE_1056568_length_197_cov_3.07042_g1039154_i0	197	CGCTCCCCTTCCTCCCGCCGTAGCGCTGTCGTGATACGGCAGCTGCTGCGAGACAAGGCGGCAACCCGCCATCCCATTCGGAGGAGGGGAAGGCAACGTTAACGGCGGCGCATTCGATAGCCTGAACACATTACATCGTTGCAGAGAAACGATTGAGCAGGGCATGGCCAACGGCGGCAGAGAGCACAAGCGTGCCA	0	0	0	0	0	0	0	0	0	0	0	0	0	0	0	0	0	0	0	0	0	0	0	0	0	0	0	0	0	0	0	0	0	0	0	0	0	0	0	0	0	0	0	0	0	0
43	NODE_1062324_length_196_cov_4.20567_g1044910_i0	196	CCACAAATTAATTTTCCCTCCATTTTTCTCCTTGTGCACCCAGCTCTCCACTTCTTCCACTCACCCTGTTCAGTTACATGTTCAATTGTGCACAATATTTACACCAATAGTACATGGACCGATGTCTGATGGACATCCGTATTCATGGAGCATTCACGTATGTACGTGATAAAGAAGAGACAAAGCGCTGTGATGA	0	0	0	0	0	0	0	0	0	0	0	0	0	0	0	0	0	0	0	0	0	0	0	0	0	0	0	0	0	0	0	0	0	0	0	0	0	0	0	0	0	0	0	0	0	0
44	NODE_1064615_length_196_cov_2.36879_g1047201_i0	196	CACCTGGAGTGTCCAGGAGAAAACCCTCTGGCAACGTAATCAGGGATTAAATGGAAATCCATGTTTAACCAAGCCTGAATTTTGTTTTCTTCCAAGGCAGCAACCCACAAAAAATGCATTTGAGTTAGTTTTCCTTTTTGCTACACAGAAACCTAGACCACCAGAGCCACATCAGTCCAATTAGCTGCCATCTAAT	0	0	0	0	0	0	0	0	0	0	0	0	0	0	0	0	0	0	0	0	0	0	0	0	0	0	0	0	0	0	0	0	0	0	0	0	0	0	0	0	0	0	0	0	0	0
45	NODE_1075229_length_194_cov_6.02878_g1057815_i0	194	TGCTGGGACGCTGTCGTAATCATCACACCCGGGCCGCTGAATTGATATTATCTCACCAGACCTTTTACTGCGACCTTTTATCCCGTCACGGGTGTCATGACTGAGACTACGCTGAGGCCATCATGTCATATACATCGGGGCGTGATGTGTACCGAGACAAGTGTGACCATCTGGGTAGCCTAGTATTTATCCGG	0	0	0	0	0	0	0	0	0	0	0	0	0	0	0	0	0	0	0	0	0	0	0	0	0	0	0	0	0	0	0	0	0	0	0	0	0	0	0	0	0	0	0	0	0	0
46	NODE_1078950_length_194_cov_2.88489_g1061536_i0	194	CCCCTTCACTCGGAAGCCGCCGGCGTCGTTGGGCTCGGCCGGTCTCCGGATCGTCCGCGGCGATGCGGTGTGACCCGCGATTGCCGCTGACGTTTTCCCGGCGCGGACGGATGTCCGTCGCCCCGCCGGCCGTCCGTTTCGGCGTTGCCGCCGAACCAGCGTGCCGGCCGCCACGTCCGGTCGCCCGGTCGTGG	0	0	0	0	0	0	0	0	0	0	0	0	0	0	0	0	0	0	0	1.8447	0	0	0	0	0	0	0	0	0	0	0	0	0	0	0	0	0	0	0	0	0	0	0	0	0	0
47	NODE_1094418_length_192_cov_3.19708_g1077004_i0	192	GTTCTGGAAGTGAAACCGGCTCTTCTTCCGGTAGCGAGTCCGGTTCCGGCAGCGAAACTGGTTCCGGAAGTGAGACTGGTTCCTCGTCTGGTTCGGACACGGGTTCGTCCTCTGGCTCAGATTCAGACAGCGCAACTCCCGCTTCTAATGCCGGAGGAAAGTCAAATGCTGGAGGAAAGTCTAATGCCGGAG	0	0	0	0	0	0	0	0	0	0	0	0	0	0	0	0	0	0	0	0	0	0	0	0	0	0	0	0	0	0	0	0	0	0	0	0	0	0	0	0	0	0	0	0	0	0
48	NODE_1095763_length_192_cov_2.0146_g1078349_i0	192	GGAGGCTATGGCGACTGCTGCATCTTCCGCGACTTCCTCTGGCTTCGATCTTGCTAGTACGGGTGTAAAAACTGCCGGTAATGCGCTTGGCACAGCAGCCGGTTTCATCCCTTATATCGGCAGCGCGGCAAGCGGTGCTATCAACACCGGTGCTACTGTCCTCTCTGCTGGCATCGATATTGCGAAGGAACC	0	0	0	0	0	0	0	0	0	0	0	0	0	0	0	0	0	0	0	0	0	0	0	0	0	0	0	0	0	0	0	0	0	0	0	0	0	0	0	0	0	0	0	0	0	0
49	NODE_1095891_length_191_cov_45.7868_g1078477_i0	191	GGGTTTAGCTTCTTAGTTCCGATGGGTTAAGGCGGGTTACCGTACATATGAACGAATGCAGCATTCATTACCTTAGGTTCCCCGGTGGTCCCCCTCCTGAGTACTGGTAAGGCTGATACGGGTTTAGCTTCTTAGTTCCGATGGGTTAAGGCGGGTTACCGTACATATGAGGGGCAGATCGGAAGAGCACA	0	0	0	0	0	0	0	0	0	0	0	0	0	0	0	0	0	0	0	0	0	0	0	0	0	0	0	0	0	0	0	0	0	0	0	0	0	0	0	0	0	0	0	0	0	0
50	NODE_1102832_length_191_cov_3.53676_g1085418_i0	191	CCCAGAAGGGGACGGCCTCTGCCGCCGTCAAGCCGGAGGCCGCCGGCACCGTTGCGCACATCCCGACGGTGATAAAGACCAAGACGATGTGATGCAGCCCTACGGCCGGTGCTTAATTAGATCCACCCCCGTGACTATTTGCTTCTGCTGTCGCTCCTCATCGCAAGACCATGTTGAGCCGTCCGTTTCCT	0	0	0	0	0	0	0	0	0	0	0	0	0	0	0	0	0	0	0	0	0	0	0	0	0	0	0	0	0	0	0	0	0	0	0	0	0	0	0	0	0	0	0	0	0	0
51	NODE_1112444_length_190_cov_3.74815_g1095030_i0	190	GAAATCCGCAGCAATTAACTCTAAAGGATATCAACTTCTCAGCTAGCGCGCTAGTTCAGAGGGATAAATCGGCATCAGCAAGATCTGCGTTCTCTGCATTCTCTGCAGCAGGTGCAGCTTTAAGAGCAGTCTTGGCCGCAGGAGCTGGAGTCTCGGCAGCAGGAGCTGGAGCAGCCTTGGCAGCTGGAGC	0	0	0	0	0	0	0	0	0	0	0	0	0	0	0	0	0	0	0	0	0	0	0	0	0	0	0	0	0	0	0	0	0	0	0	0	0	0	0	0	0	0	0	0	0	0
52	NODE_1114853_length_190_cov_2.48148_g1097439_i0	190	GGGAACTGTACCCATGATACTTTCAAATATTTTGGAAAACCAACAAATATGAGGTTGGCTGATTGCCCCTAACATCACTAGACAAAGCGGCGAAAGAAAAGGATGAACCCAAGGATCCGGACTGCCAGCTCAAGCACCGCATAAATACTCCGAAAACTCCTGTGAACCCTGAAGGAGTCTCCCATTTCAG	0	0	0	0	0	0	0	0	0	0	0	0	0	0	0	0	0	0	0	0	0	0	0	0	0	0	0	0	0	0	0	0	0	0	0	0	0	0	0	0	0	0	0	0	0	0
53	NODE_1115157_length_190_cov_2.22222_g1097743_i0	190	TTTCACTTCTGGTCATGGGTCTCTTGCGCTTCATGATCCGCCTCTTTCCTGTGCGCCCTGCCGCTTGCCGTCGTGCGGCTGCGGCCTTTCGGTTCCTATTCTAGCACAGGTCCCGGGGAAAGAAAATGGTACGGACGACGACGGTCATAAAGAAAGGCCGAACGACCCTCGCCTACGAGAGCCGTCGGCC	0	0	0	0	0	0	0	0	0	0	0	0	0	0	0	0	0	0	0	0	0	0	0	0	0	0	0	0	0	0	0	0	0	0	0	0	0	0	0	0	0	0	0	0	0	0
54	NODE_1119377_length_189_cov_5.0597_g1101963_i0	189	GTGGTGATGCATCATCACAAGTCAACGTGGCTGAACGAAGTCCTTTCCTATGGCAGGACGAGATAGCACATTCTGGCCTTAGCGGGTTACCAGCTTAGCGGCTAAAAGGAATGGTACGGTGCGGTACTTATATGATTAAGAGCCGTAGGAGCCGTTGAGGGTACAATGCACTCCCTCCGTTGATGCACC	0	0	0	0	0	0	0	0	0	0	0	0	0	0.644833	0	0	0	0	0	0	0	0	0	0	0	0	0	0.597375	0	0	0	0	0	0	0	0	0	0	0	0	0	0	0	0	0	0
55	NODE_1132409_length_188_cov_2.06767_g1114995_i0	188	ACCAAGTTGCTAAGACATAATTTAGAGAGTTTGAGCTTATGAAAATTCATACCATCCTTGAAGAGAATAAGCCCAACCAATATAATTCAATGAATATCCATTATGTCTTACTTAGATCAATTTCTACCACTTGAGTAGATATCCGAGTATATAACCAATACCTTGATCAGAGCATACCGTCACAAAAT	0	0	0	0	0	0	0	0	0	0	0	0	0	0	0	0	0	0	0	0	0	0	0	0	0	0	0	0	0	0	0	0	0	0	0	0	0	0	0	0	0	0	0	0	0	0
56	NODE_1139581_length_187_cov_2.95455_g1122167_i0	187	GGACGTCGCCCGCGGACGCCGGGGCCGGCAGGCAGGCCGCCGCCGCGGCCGCTAGCAGGAGCGCGAGCACGGCGAAGCCGAGCCTGGCCATGTCGATCGGGGCTTTGTCTCCGGTGGGATGTGGGTTCTTGCGGTTTGCTTCGGTCGATGCCGGTGTGCAGCTAGGTGACCTCCCAGATCGGAAGAG	0	0	0	0	0	0	0	0	0	0	0	0	0	0	0	0	0	0	0	0	0	0	0	0	0	0	0	0	0	0	0	0	0	0	0	0	0	0	0	0	0	0	0	0	0	0
57	NODE_1142758_length_186_cov_7.65649_g1125344_i0	186	ATCTCACCGAGAAGAGACGAAGCCACACAGAGCAGAGATTGGGTGGTAGGCGCGTCAAGCTTAGGCGAGATGCGCCTCTACCCATCCTACTCAATTAAGCGTCTACCTAGTGGGCGTAAATTATAATTCTCACGTGGCTGTCCTATATCAGTTGACCAAAACAACATGGGTAAACACAACTACGCC	0	0	0	0	0	0	0	0	0	0	0	0	0	0	0	0	0	0	0	0	0	0	0	0	0	0	0	0	0	0	0	0	0	0	0	0	0	0	0	0	0	0	0	0	0	0
58	NODE_1145707_length_186_cov_4.67939_g1128293_i0	186	TTGAGCTACTAAGCAAATCTATAAACGGACTATTTGCCCTTATACGCTATTACTGCGGTTTTATAGGTATCATTCTCAGTATTTCCTGGCCGGTACGCTATGATCTGTTAGACCATTAAACTAGCATGTGTTAATCCCCTAGATAGCAATCAGTATGCACCATAATCAAATGCTTTAGATCGGAAG	0	0	0	0	0	0	0	0	0	0	0	0	0	0	0	0	0	0	0	0	0	0	0	0	0	0	0	0	0	0	0	0	0	0	0	0	0	0	0	0	0	0	0	0	0	0
59	NODE_1149091_length_186_cov_2.80916_g1131677_i0	186	CCCATCAAGAGGAAAAGAGAACTCCTCCGGGGCCACAACAACCCGACCCCTGTTGATCAGCCGGAGAGGCACGATGCCGGTACGCGAGGCCGCCCGGCAACCATCGTGGCGGAATGTTAAGGGCCGCCTTCTTGTTCACCAGACCCACTCAATGAACTCTGCAACCGAGAACAAGGTCACCACCGG	0	0	0	0	2.09878	0	0	0	0	0	0	0	0	0	0	0	0	0	0	0	0	0	0	0	0	0	0	0	0	0	0	0	0	0	0	0	0	0	0	0	0	0	0	0	0	0
60	NODE_1149093_length_186_cov_2.80916_g1131679_i0	186	CTAGTTCGCAGCAAGACCTCTAATGTGCTGAGGTGGAGATTCGAATTGATCATCGACTCGCAGGTAACGACTGGATAGCGACTTCCAGCCGACAGTAAGCTTGCAAAGGCTTACTGGATTTTCACTCAACTCTGTGTTTCACGGGGTTGTCACCGTCGCGGACGACGCAGACTTGCGATCTACGCC	0	0	0	0	0	0	0	0	0	0	0	2.0581	0	0	0	0	0	0	0	0	0	0	0	0	0	0	0	0	0	0	0	0	0	0	0	0	0	0	0	0	0	0	0	0	0	0
61	NODE_1150144_length_186_cov_2.10687_g1132730_i0	186	CAGACAACAAAATCCAATAATAGTGCTTAGAAGATTATGACGATGCAAGAAATACATCAGATAGCTATAACATCTTAAGATCAGACGATATGCTATGCCGAAATATTAGCGAGTGTCAAGACGACTCAAGCTATATTTATTAGAAATAGCGAAAAATTATCTCGAGATGAGATATAACTCCGTGAG	0	0	0	0	0	0	0	0	0	0	0	0	0	0	0	0	0	0	0	0	0	0	0	0	0	0	0	0	0	0	0	0	0	0	0	0	0	0	0	0	0	0	0	0	0	0
62	NODE_1158697_length_185_cov_2.82308_g1141283_i0	185	GGCCACGCAGCTCTACCCCGAAAGGCAGTTTTGTTCGCTGCTTGATGCCATTTGACCTGGCTCATCCATGCCAGTCATGTCTCTCGTAACTCGTGAGACGACCATCTTCGTTGCGGTCAACGGCACAGCTGCCTCGGCAAGACCAGGGGACCGAACCGCGAACGACCCGGGCCCGCAGGCCATGC	0	0	0	0	2.50704	0	0	0	0	0	0	0	0	0	0	0	0	0	0	0	0	0	0	0	0	0	0	0	0	0	0	0	0	0	0	0	0	0	0	0	0	0	0	0	0	0
63	NODE_1159820_length_185_cov_2.12308_g1142406_i0	185	GGATCACTTGCCGGCATTGTTATAACGGTAACTGGTCGCGCCACTATCATGTTTCTGGCAAGTACTAGAAGTATCAGCAGTAGCACTAGATCCGCTTATGATGCTTCCTGAATCAGCGAAGCAGTTAGAAATATCGGCAGCCTTAGTACCAGCAGCCCTTGTCACCATTCCGAATACGGTCAGGC	0	0	0	0	0	0	0	0	0	0	0	0	0	0	0	0	0	0	0	0	0	0	0	0	0	0	0	0	0	0	0	0	0	0	0	0	0	0	0	0	0	1.86864	0	0	0	0
64	NODE_1177562_length_183_cov_2.875_g1160148_i0	183	GTTAACGTTGTCTCTCAAGTTCTTAAAAACACCGTTAAGGCGCCAACCACTGCGCAGGTGCCATCTGCAGCACAAGCTTCTGCGCAAGCACCCGCTGCGCCTTCTGAACAAAAGGCAACTCAAACGGATGCAAAAACTGGTACTGCTACAGCACAGCAGGATCCCCAGCCCGCAGCAGGTAAC	0	0	0	0	1.22778	0	0	0	0	0	0	0	0	0	0	0	0	0	0	0	0	0	0	0	0	0	0	0	0	0	0	0	0	0	0	0	0	0	0	0	0	0	0	0	0	0
65	NODE_1188280_length_182_cov_2.16535_g1170866_i0	182	GGATGGTTGAATGCGTAAGCGCTCGTTCAGAAACTAAGAAACTCGGCTAATTAAGCCTCTAACAAAATCCACGCAACTTAGTATTAGAAATAAATATCCCTATACAAAGATCACAAATATAATAAATTTTGTGTACAAAGCAGCATAAAATCAATACAATTAAGCAAATCGATGCACGTATC	0	0	0	0	0	0	0	0	0	0	0	0	0	0	0	0	0	0	0	0	0	0	0	0	0	0	0	0	0	0	0	0	0	0	0	0	0	0	0	0	0	0	0	0	0	0
66	NODE_1196627_length_181_cov_2.92063_g1179213_i0	181	CGCCCAACGTCATGGGCTTCATCAAGTGATCCAGCTAGCTCTCGCCGGCCTTAATTTTGACTCCGCCTCGATCTGTGCAGACGCATGCATGCATGCATGCGCTCGTCAGGCATCGAATTCCTGCAGATGAAGCTTGGCGGGACTACATGTGGAGTTTCACCGGGGAAATTAATTAAGGAAC	0	0	0	0	0	0	0	0	0	0	0	0	0	0	0	0	0	0	0	0	0	0	0	0	0	0	0	0	0	0	0	0	0	0	0	0	0	0	0	0	0	0	0	0	0	0
67	NODE_1198022_length_181_cov_2.19048_g1180608_i0	181	GTGGCACCGGAGGCCCCGGCCACACCTAGCGTGCCCGACGAGCCGGACACTCCCACCGAGCCTGCTTCCGTGCCTGCTAAGGAGTGCCCGCCGCCGACGACGCCACAAAGTGTTGTCACCCCAGAGTCCGTGAAGCCAGAACCAGAGCCAACGCCAGTCGAGCAGACGGTTAAGTCCTGTG	0	0	0	0	0	0	0	0	0	0	0	0	0	0	0	0	0	0	0	0	0	0	0	0	0	0	0	0	0	0	0	0	0	0	0	0	0	0	0	0	0	0	0	0	0	0
68	NODE_1198081_length_181_cov_2.15079_g1180667_i0	181	TGGGCAATTGACAAATAAAGAAAAGCATACCATGATGCATATACAAGCTAGCAAGAACATAAGTGAGGTTTGATATGGGCATTACATCAAAATACATAGACCGTCATCCAACTGCATCTATGACTAATAATCCACTTCAAGGTAACATCCGTTAATCCTCTCAGTAATTAAGTTGCAAGCA	0	0	0	0	0	0	0	0	0	0	0	0	0	0	0	0	0	0	0	0	0	0	0	0	0	0	0	0	0	0	0	0	0	0	0	0	0	0	0	0	0	0	0	0	0	0
69	NODE_1198106_length_181_cov_2.13492_g1180692_i0	181	GCCCTGAGGTGCAGATGCCCCTGCATTCAGATCACCAGATGCAGGCGCCTTGGACACACAACTCGGGTTACATGTACAAATACGATCGATCAGTCAGAAAGGAATAATCAACATGGAACGAAATGTTGAGGAGCCCCCGTGTTCATCCGGTATTATTCTGGCTTCCGTTGGGACAGCTCTG	0	0	0	0	0	0	0	0	0	0	0	0	0	0	0	0	0	0	0	0	0	0	0	0	0	0	0	0	0	0	0	0	0	0	0	0	0	0	0	0	0	0	0	0	0	0
70	NODE_1214266_length_179_cov_4.25806_g1196852_i0	179	GCAGAGCTACACCGTCTAGACGGTGGCCGGAGAGGGCTGGTCTGGTCTCGTCTGGTCTTCGCCCCTTCCTTCTGTTGGTGCTTCAGTCTTTTGTGTGTTTTCGGGCGGTAAGAGCAGCTTGTACAACTATGCCGGTGTATCTGTGTGCTACTATGTATACATCTCTCTTTGAACTGCAA	0	0	0	0	0	0	0	0	0	0	0	0	0	0	0	0	0	0	0	0	0	0	0	0	0	0	0	0	0	0	0	0	0	0	0	0	0	0	0	0	0	0	0	0	0	0
71	NODE_1216041_length_179_cov_3.43548_g1198627_i0	179	TAAGGGTTCCCGCGCCATGGCGATCAGCGCGGGGTGAGGCGGCCCCTAAGCCGAGGCCCCAGAGGCGTAGGCGATGGGTAGCGGGTGAACACTCCCGCCCCGTCTCGCAGTGTTGAAGTCACCAGGGACACCGGAACGAAGCGCGAGCGGCCTTGTGGATTGGCCGTCTAAGGGTGTAG	0	0	0	0	0	0	0	0	0	0	0	0	0	0	0	0	0	0	0	0	0	0	0	0	0	0	0	0	0	0	0	0	0	0	0	0	0	0	0	0	0	0	0	0	0	0
72	NODE_1222121_length_178_cov_5.99187_g1204707_i0	178	GCCGATATACAGGCCCCATTTCCCATAGGGGAACCCTCAAATTACATGCAGCCATATATTTTTCACAACAACACTGAATTACCCACCCATATTCTAACTGCATAGTGTACAACATTGATTTTTCTTTTCATTCTATTCCCTTTGTCAGGGAAGGCAATCTAAAGCCCTACATTTTCTC	0	0	0	0	0	0	0	0	0	0	0	0	0	0	0	0	0	0	0	0	0	0	0	0	0	0	0	0	0	0	0	0	0	0	0	0	0	0	0	0	0	0	0	0	0	0
73	NODE_1227374_length_178_cov_2.99187_g1209960_i0	178	GATGACTCCAGGCTATTATTATATCTAATATATAAGCATATGAGAAGCTAACTGACCATACAAAATGAGCATTTGTGTACATTTGCATCTCTATTTAGAATGCAGTTCCTGAGGACAAGAATCATGGGCGAGGGCTTTGCCTCCATTAAATACCCTTTAGAAAAGCAGTTGAAATAAG	0	0	0	0	0	0	0	0	0	0	0	0	0	0	0	0	0	0	0	0	0	0	0	0	0	0	0	0	0	0	0	0	0	0	0	0	0	3.01621	0	0	0	0	0	0	0	0
74	NODE_1228167_length_178_cov_2.61789_g1210753_i0	178	AGAGACATGGCGGTTTCCACAAAGATGGCTTCCATAAAGGCGGTTTCCACAAAGATGGCTTAAGACGCGATGGTTTCCACAAGGGTTCCTTTAATCGCGATGGCGAGCGCAATGATCGCAATGAGCGCCGTGATTTTGATAGCAATGATACTAGACGAGATGGTGCTAGAAAGTCTTT	0	0	0	0	0	0	0	0	0	0	0	0	0	0	0	0	0	0	0	0	0	0	0	0	0	0	0	0	0	0	0	0	0	0	0	0.456402	0	0	0	0	0	0	0	0	0	0
75	NODE_1228866_length_178_cov_2.2439_g1211452_i0	178	CGCCCTGCATGCTGGTGGAAGCAAAGCTGACACAAAAGCCAAGGACTGCAAACACATGCTAAGCCTAACCCCCCGCTGCCAAGGCTACGGGATGTCTGACTGCGCAACATGTCTAAAGTGCCCCCGGCATCTGAGCTAGCTGCTCCCATCGCAGGTATCCGCGAGCACTGAGACACAC	0	0	0	0	0	0	0	0	0	0	0	0	0	0	0	0	0	0	0	0	0	0	0	0	0	0	0	0	0	0	0	0	0	0	0	0	0	0	0	0	0	0	0	0	0	0
76	NODE_1234392_length_177_cov_4.52459_g1216978_i0	177	CTTCATAATATATTTTAGTAAAGATTACAAATTATACACAGGTCCGAAGCCAATAATAGCATTAGCCATGCGTATGAATTTCAAGAGAGATGATCAGACAGTTAGCGGGGCTTCTCCCCGTGGATTTCAAGAAAGATGATCGGGCAGTTAGTAGGGCTTCTCGCCGTCGTAGTTCCC	0	0	0	0	0	0	0	0	0	0	0	0	0	0	0	0	0	0	0	0	0	0	0	0	0	0	0	0	0	0	0	0	0	0	0	0	0	0	0	0	0	0	0	0	0	0
77	NODE_1239313_length_177_cov_2.2623_g1221899_i0	177	GGAGGAGGTCATGTAGTAGGGCTCCGGTGTTGGAAACTAGCATTGCGCTGCAGCCCTGTTTTCGCCTCGGCTCAGCGATCAACTCAACTTCCGGAACGGGACACGTCACTTACCGAAAAATCCGTCAATACCCTTGCCGCTGACGAGCGCACCCTACTCCGTCCGAGGACGCGCAGG	0	0	0	0	0	0	0	0	2.06208	0	0	0	0	0	0	0	0	0	0	0	0	0	0	0	0	0	0	0	0	0	0	0	0	0	0	0	0	0	0	0	0	0	0	0	0	0
78	NODE_1258645_length_175_cov_3.06667_g1241231_i0	175	AGATGATGCAGCAGGGCAGCGGCTACGACAAGGCCGCCCTCGAGTCCGCTGAGCTGGCCGCCTTCGAGAAGGGCCGCATGCAGGGCGAGATGGAGGCCATCCGCCGTGCCGAGGCCGAGGCACCCCTCAATACCATGGCTGTGGCGCCTGTCGGCATCAACAACAACCAGCCCGC	0	0	0	0	0	0	0	0	0	0	0	0	0	0	0	0	0	0	0	0	0	0	0	0	0	0	0	0	0	0	0	0	0	0	0	0	0	0	0	0	0	0	0	0	0	0
79	NODE_1269472_length_174_cov_3.08403_g1252058_i0	174	CTGCGTGGCCCAGTCAGCAGGATCAGACTCGCATGTGTCAGGGTCACCATGGGTCAGTGAGGAGGGCAGATGGGGACGGTGGCAGCAGCTGCTTATACACACACATTTAGGAGGACAGGAGTCGTAAGGGGAACCTTTTTAAGTAGAGTGAAAAGCAGCCCATTCAGCATGCCT	0	0	0	0	0	0	0	0	0	0	0	0	0	0	0	0	0	0	0	0	0	0	0	0	0	0	0	0	0	0	0	0	0	0	0	0	0	0	0	0	0	0	0	0	0	0
80	NODE_1272999_length_173_cov_9.94068_g1255585_i0	173	CGGATCTGCAAAAAGAAATGAAGAACGCTAGAAACAGATGAAGTGAAGGTGAATTTAAATTCATCTTTTACCTTATCTAAAAGATAAAGTCTAAAGCAGGGGCCTGCTGGTCGAATCTGGCCCACCTGTCTCTGGAAACGAAACTTTACTAGAAAGCAGTCACACCCACTCAC	0	0	0	0	0	0	0	0	0	0	0	0	0	0	0	0	0	0	0	0	0	0	0	0	0	0	0	0	0	0	0	0.449587	0	0	0	0	0	0	0	0	0	0	0	0	0	0
81	NODE_1282531_length_173_cov_2.33898_g1265117_i0	173	GCGCCCGGAACACGGCGCAGCCGACCACGCCGGCGCCGATGATCGCGGCGTCATAGGGGAAGGGGTCGTTTGGCTGTGCCCGTTCGGTCATCGTGATCATAGAATCTTGCCCGTTCGGTCAGATACGGGCTGTCGCGTGCCGGAGCAAGCTATATCCTGCAGTCATGAGACGG	0	0	0	0	0	0	0	0	0	0	0	0	0	0	0	0	0	0	0	0	0	0	0	0	0	0	0	0	0	0	0	0	0	0	0	0	0	0	0	0	0	0	0	0	0	0
82	NODE_1289989_length_172_cov_3.90598_g1272575_i0	172	TTGTGGTATTCTTTGTATCGATTAGATTGCGAAGAGTGCAACAGCTGCGAGTGTGAGGATTGCCTGAACAACTTCAGAAACTAAGGCAAGTGGCACCCTTCATGTAGTATTTTTGTTGTAGTATTGTATGTGTAGGAATTGTGTGTTATTATGCTATGCTATCAATCCCAAT	0	0	0	0	0	0	0	0	0	0	0	0	0	0	0	0	0	0	0	0	0	0	0	0	0	0	0	0	0	0	0	0	0	0	0	0	0	0	0	0	0	0	0	0	0	0
83	NODE_1292676_length_172_cov_2.8547_g1275262_i0	172	ATTGGGTCCATGGAAGAAATTTTTAACTGGGATTAGTTTTACTTTTGAGTCTCTTCGGGGACATGAGGGATGGATTTGAATTTGGATGGAAGAGGAAGACGTGAACTTTGAGGATTCTATAAATTACTTTGGGTCAAACTAAGGGGAGATAATATGGTCTTGACATCTCCGG	0	0	0	0	0	0	0	0	0	0	0	0	0	0	0.492382	0	0	0	0	0	0	0	0	0	0	0	0	0	0	0	0	0	0	0	0	0	0	0	0	0	0	0	0	0	0	0
84	NODE_1303083_length_171_cov_3.16379_g1285669_i0	171	CGCTGTTGCACATGGTTTGGAATCGCTGGGTGGGACGTAGATTCCCGTCAACCCGCTTTGGGTGCAGCGCTTGTTCTCTATGGTCGATGCGGCTGCTTCTCCGGCAAAAAGACTACGTGGTCCTACTGTCTTTCCGCTTCATAAAATCAAGCAGAGCTGCCATCAGAAAAA	0	0	0	0	0	0	0	0	0	0	0	0	0	0	0	0	0	0	0	0	0	0	0	0	0	0	0	0	0	0	0	0	0	0	0	0	0	0	0	0	0	0	0	0	0	0
85	NODE_1305073_length_171_cov_2.37931_g1287659_i0	171	GTCGACGAAGCGCAGCGCTACGTGCGCGATGCCGCCGGCAGCGCCGGGATGGGCGGCGCCCAGACCGCCGGCGCCGGGTCGTCAGGTTCGACGGGGACGTCCGGCTCGACCGGTTCGACCGGTTCGTACGGGTCGTCCGGCACGAGCAGCGGCAGCGGTTCGGCGTACGGC	0	0	0	0	0	0	0	0	0	0	0	0	0	0	0	0	0	0	0	2.35557	0	0	0	0	0	0	0	0	0	0	0	0	0	0	0	0	0	0	0	0	0	0	0	0	0	0
86	NODE_1305075_length_171_cov_2.37931_g1287661_i0	171	ATGGCCGGCACCGATAATTACTACTTTTCTTCGTTCCACGGATATTCCCTCCCTTTTTCCGCTTCTTGTTTTTTATTATACCATATATTTACTACTTAGAAAGAATAAGAAAAACACGTATTTATGCCGTTTTATAAATAATTCACCGCTTTAAAAAGGTATATTGCAACC	0	0	0	0	0	0	0	0	0	0	0	0	0	0	0	0	0	0	0	0	0	0	0	0	0	0	0	0	0	0	0	0	0	0	0	0	0	0	0	0	0	0	0	0	0	0
87	NODE_1305158_length_171_cov_2.35345_g1287744_i0	171	GGCGAATGGCGGTAAAGAACACCGACACAATCTCCACCCTCAAAATCTCGGAACTCCAGTCGACCACTGACAAGAGGCGGCGCCGCCCCACCGTCGAGAAGAAGAAGTAACTCGAAGCTTCCGTCCATTGCACGATGCTAAACTGCTGGTTTGTCACCTACCACCAACGAC	0	0	0	0	0	0	0	0	0	0	0	0	0	0	0	0	0	0	0	0.53012	0	0	0	0	0	0	0	0	0	0	0	0	0	0	0	0.565577	0	0	0	0	0	0	0	0	0	0
88	NODE_1309815_length_170_cov_5.33913_g1292401_i0	170	CTCTTGTAAAATTAGTGACGAGCAGATGAAGCTGCCTAGTCAAGGTGTACTAATCTAGTATGGAAGATAACAAACCCAACTATCACTTCCTCATGAGCTAAAACAGTGGCACAAAATGAGAAGTTATTTGAAAGTTTTAAAGGTAGCACATGAGAATTTACTTGGAATGG	0	0	0	0	0	0	0	0	0	0	0	0	0	0	0	0	0	0	0	0	0	0	0	0	0	0	0	0	0	0	0	0	0	0	0	0	0	0	0	0	0	0	0	0	0	0
89	NODE_1314799_length_170_cov_3.06957_g1297385_i0	170	GTAATGCTCAATGTCGCATAATGATGAAGAATTTTCTTTAATATTTTTAGTATCTTTAGTATTGTCGAAATTATTGTTATCGTTTTTGCAAGAGTTTTCTAAGCTTTCTGCTTCCTCGTTTTTCTCGCTAGAATTCTTAGAGTTATCGTTGTTTTCCTCGTACTCGTCAT	0	0	0	0	0	0	0	0	0	0	0	0	0	0	0	0	0	0	0	0	0	0	0	0	0	0	0	0	0	0	0	0	0	0	0	0	0	0	0	0	0	0	0	0	0	0
90	NODE_1316668_length_170_cov_2.4_g1299254_i0	170	CTGCTGCAAAAGTGGAATTGGAGATAAAAGGATTAAGTTGCTGTGAGGTGAGTGACGCATAGTCATGTTAAGCAGTGTAAATAAAAGGGAACCCTTCTATTTCTAAGTGCGCCCTAAGAGAAATCTGGGAAAAGTGAGGTGTACCTCTTTGCTCTGAAGGAGAGGCAGCG	0	0	0	0	0	0	0	0	0	0	0	0	0	0	0	0	0	0	0	0	0	0	0	0	0	0	0	0	0	0	0	0	0	0	0	0	0	0	0	0	0	0	0	0	0	0
91	NODE_1316704_length_170_cov_2.4_g1299290_i0	170	TGCTAGCGTAGAAGGGGACGATCCAGAACGATCTCAAACCCTAGAACCTCTGTACGGTCATCTTCTCCACATAGACCAGCAATACAACCACCAAAGCAGGACGTAGGGGTTTTACCTCTCCGAGGGCCCTGAACCTAGGTAACTGCCGTGTCCATCTCTGCAGTGCCAGC	0	0	0	0	0	0	0	0	0	0	0	0	0	0	0	0	0	0	0	0	0	0	0	0	0	0	0	0	0	0	0	0	0	0	0	0	0	0	0	0	0	0	0	0	0	0
92	NODE_1322696_length_169_cov_4.72807_g1305282_i0	169	CACCAACCATCTGCCTCTTCGTCTCTAAAACCTGTTATGTCATTACTGAAGTCGTTCTTAGGGTGTACCTTTCGGATAGCACCTTCTTCACCTTCCATATACTTCCAGTACGGCAATATATCCAAAGCTCTAAGTGTACCTGCTAATTTGTTGAAATCATAGAGGTATA	0	0	0	0	0	0	0	0.465948	0	0	0	0	0	0	0	0	0	0	0	0	0	0	0	0	0	0	0	0	0	0	0	0	0	0	0	0	0	0	0	0	0	0	0	0	0	0
93	NODE_1325110_length_169_cov_3.68421_g1307696_i0	169	TGGGCAGGGTAACTTCTACCGCACCGGAGAGACGCCGACCACGCCCGAGCCGCCCGCGACGCCGTCCTCTCCGGCCAGCGACGAGAAAAGCTCGTACAGCGGCGGCGGCGGGGGCGCCAGCAAGGAGGTGGACGATGACGGCGAGCCGGTCGACGGGCTGAGCCCCAAG	0	0	0	0	0	0	0	0	0	0	0	0	0	0	0	0	0	0	0	0	0	0	0	0	0	0	0	0	0	0	0	0	0	0	0	0	0	0	0	0	0	0	0	0	0	0
94	NODE_1325301_length_169_cov_3.61404_g1307887_i0	169	GAGGACATGAGTATTTTGTTGGGATTGTTACAAGTGAATGACTCGATTTTGTGGTCCGTTGATCGATCATCGGCGCGGGTTGTTGTTGCTATCATACACGGGTATGTCCACCCTGCTGCGGCGCGCGCCACCCGTGTGGGTGAACATCTCCTCGATCTCCTCCAGCGGC	0	0	0	0	0	0	0	0	0	0	0	0	0	0	0	0	0	0	0	0	0	0	0	0	0	0	0	0	0	0	0	0	0	0	0	0	0	0	0	0	0	0	0	0	0	0
95	NODE_1328313_length_169_cov_2.54386_g1310899_i0	169	CACATAGTCGGTGAATTCATTCGATCACCAGTCAAGTCATAGGTAGTGCTATTACAAAATTGGATGCATGAATGAAATGAATTTGATGGACATAAATCACGAGGCAGTCCCAACCAGCTTGTTGGCTGTGGCGCTGTCATCTTTGACGTCCTTCTTGATCACCTCCTTC	0	0	0	0	0	0	0	0	0	0	0	0	0	0	0	0	0	0	0	0	0	0	0	0	0	0	0	0	0	0	0	0	0	0	0	0	0	0	0	0	0	0	0	0	0	0
96	NODE_1328598_length_169_cov_2.42105_g1311184_i0	169	GATTAGTGGCTTTGGTTATGAATTTGCTCAATCTAATTTTATTTGGTTGGAAGAAGTATCAGAGTTGGAACTTGTTGAGTTGAATGGCTAAGACGTTTGTTAAACGCTCAAATGCGCGTTGGGGTCAAGTCTGGTATGAGTCCAAAGTAACATGGTTAGCTATATTGGC	0	0	0	0	0	0	0	0	0	0	0	0	0	0	0	0	0	0	0	0	0	0	0	0	0	0	0	0	0	0	0	0	0	0	0	0	0	0	0	0	0	0	0	0	0	0
97	NODE_1329487_length_169_cov_2.03509_g1312073_i0	169	GCGGCCGGCGACATCGGAGGTTCGTCCACCGGGGTCACCGATCACCGGCAAGCCGGATTGGAACAGGAAAGGCGACAGAGCCGCAGCCCGAGAGGGAGGCGGGGAAGCCGCCGGGTGGCCCTCGGGTCAACCGGAGGGCGTGGAGCCCGACCGATCAGGAGGCCCCGAG	0	0	0	0	0	0	0	0	0	0	0	0	0	0	0	0	0	0	0	0	0	0	0	0	0	0	0	0	0	0	0	0	0	0	0	0	0	0	0	0	0	0	0	0	0	0
98	NODE_1338315_length_168_cov_3.19469_g1320901_i0	168	TCTGAATCACGAGCGGTCAACGCGCGATGAGACAATCCATGCCACGAGCACCAGCACCAAGATTAGGCTGGAATGGACAACCCACACAAGCCAAAAACAAGATAGGTTGGGCCAAAGGTCCAGCTAAGAAACCTGGTAAGAAAGCGAAAGCGAACCAGAAGAAGAAAG	0	0	0	0	0	0	0	0	0	0	0	0	0	0	0	0	0	0.579535	0	0	0	0	0	0	0	0	0	0	0	0	0	0	0	0	0	0	0	0	0	0	0	0	0	0	0	0
99	NODE_1341264_length_168_cov_2.17699_g1323850_i0	168	TGGGGATATTGATGATGATTTCACGGGGATACAGGGATCAAGGGAAATAGTCAGGTGTTATGTCTTGTTCATGTATCAAGGTGGGCTGTGACCTCCTTACGGTGACTGTCATCAGTCAGAAGCCTCGGGGGATGCTTTCCCAGGCAGAAATGGTCTTGTGAATATGCT	0	0	0	0	0	0	0	0	0	0	0	0	0	0	0	0	0	0	0	0	0	0	0	0	0	0	0	0	0	0	0	0	0	0	0	0	0	0	0	1.13799	0	0	0	0	0	0
100	NODE_1354090_length_166_cov_18.5946_g1336676_i0	166	CTCTAAGTCAGAATCCATGCTGGCAAACGACGATATTCACCTTGACCAGTGTTGGAGTACCAATAGCCTTCGGGTCAACACAGTATTTCACCGCAATGCAGAATGTTGGTCAAGTTAAATCCTTTGTAGACGACTTAGTTATGAAACTGGGTACTGTAAGCATGAG	0	0	0	0	0	0	0	0	0	0	0	0	0	0	0	0	0	0	0	0	0.508559	0	0	0	0	0	0	0	0	0	0	0	1.55214	0	0	0	0	0	0	0	0	0	0	0	0	0
101	NODE_1357878_length_166_cov_5.38739_g1340464_i0	166	TGTGAAATGAACTTTTGCATTAGCCTCTTTTCATTTTTTCTTCAGGAGAAATGAGCCAAATCGCTGCTCAAATTGATAGGTTGACATTTTTATGCTTAAGATATATGGGCACTGCTACAAATCGGACGCCGATTTGTTGCTTCCCATCGGACCAGCTATTGCCCGT	0	0	0	0	0	0	0	0	0	0	0	0	0	0	0	0	0	0	0	0	0	0	0	0	0	0	0	0	0	0	0	0	0	0	0	0	0	0	0	0	0	0	0	0	0	0
102	NODE_1364741_length_166_cov_2.63063_g1347327_i0	166	TGTCGCTCCGGGTGCCGTACGTCGCCGCCGCGGGAGAGGTCTCAGAGAACACCGTTCCCTGAGGCCGCTTCCGGCGGTGAGGCAGGCACCGGCGAGCACCGCAATGGCGGCGGCGGCGAGGAGCCCCCTCCACGTTCTGCTGTACGTCCTGGCCGTGTCCGTGGCC	0	0	0	0	0	0	0	0	0	0	0	0	0	0	0	0	0	0	0	0	0	0	0	0	0	0	0	0	0	0	0	0	0	0	0	0	0	0	0	0	0	0	0	0	0	0
103	NODE_1365105_length_166_cov_2.48649_g1347691_i0	166	ACCGATTGCAGCCAACGTTACATCCCCAACTGCCTGCCCAGGGCGGCACTCAAGCAACTCAACGCATCCCTTCACATCAACCACTTACCCGCTGCTGTCAGCCAGAGCACCAAAGCAACACGCTCCGCACGCAAGCCAGTGTCAAGTGCTGCAGCCTGCAGTTATG	0	0	0	0	0	0	0	0	0	0	0	0	0	0	0	0	0	0	0	0	0	0	0	0	0	0	2.43853	0	0	0	0	0	0	0	0	0	0	0	0	0	0	0	0	0	0	0
104	NODE_1365840_length_166_cov_2.23423_g1348426_i0	166	CTAAAAGTCTTCGCGAAGCGAGGCGTGACATGGCGACTGTAAACATATCATCTGCATCTATCTATGTTTCTAGGGATAATCTTCCACTTCCAAATAGTTTATAGTTTCATTGACAAGAAAGAAAAATCATCAAACAAACAACCAGAAAATTTAATTAATATTATCA	0	0	0	0	0	0	0	0	0	0	0	0	0	0	0	0	0	0	0	0	0	0	0	0	0	0	0	0	0	0	0	0	0	0	0	0	0	0	0	0	0	0	0	0	0	0
105	NODE_1375109_length_165_cov_3.34545_g1357695_i0	165	GTTTGCAATTATTAAATATGGCATTATACGATAAACACGATCTAAATGTCTAATGTGTAGTGTTCGTTTTCGGTTCTTCAAGTAGTCCGTCCGAACATAAAGCGTCACGAGCAAAGCATGGTTGCCAGCTCTTGAGCCCTTTACGCTCCGTTCCGTCCAACGTCG	0	0	0	0	0	0	0	0	0	0	0	0	0	0	0	0	0	0	0	0	0	0	0	0	0	0	0	0	0	0	0	0	0	0	0	0	0	0	0	0	0	0	0	0	0	0
106	NODE_1377849_length_165_cov_2.50909_g1360435_i0	165	CACCGGAGCTCCGCCGGAGTCGCCTGTACGTTCGCCGCGCCTCCTCTGTACCTGTCCAGTTTCAGGTTTCAGTTTCAGTTAATTGTACCTGTCCGTGGCGACTCTTTACCTAGTTCGCGCTCTGTATCTGAGCATCATCCGCTCACCGTCCTATTGGTTCCCGGC	0	0	0	0	0	0	0	0	0	0	0	0	0	0	0	0	0	0	0	0	0	0	0	0	0	0	0	0	0	0	0	0	0	0	0	0	0	0	0	0	0	0	0	0	0	0
107	NODE_1387453_length_164_cov_3.58716_g1370039_i0	164	AACCGCGACTGCAGTGACGATTTCGTCTTCCTTGGCCAATGGAGCAGTTGCACGTTCTTCATCCTCCGTGGCCACCGGAGCGGCCGCCACGGTGGCTGCAACTTCACCTTCCTTGGCCACCGGAGCTTCCAGGACCGTGACAGTTTCATCATCCTTGGCCACCG	0	0	0	0	0	0	0	0	0	0	0	0	0	0	0	0	0	0	0	0	0	0	0	0	0	0	0	0	0	0	0	0	0	0	0	0	0	0	0	0	0	0	0	0	0	0
108	NODE_1389770_length_164_cov_2.86239_g1372356_i0	164	CAGTCTGCATCGCTCCCCGGGGAGGATGGGATGTCAGCAGCTCGAACGGGTGGCACTACTATGCGACGGCCAGTGGGACGCGCCCAGAGTTTAGTCCCACCTCGCTAGTGGAAGGGAGCCGACACCAGCTTATATAGCTGGGCAAACCTCTCCCTTCAGCTCGG	0	0	0	0	0	0	0	0	0	0	0	0	0	0	0	0	0	0	0	0	0	0	0	0	0	0	0	0	0	0	0	0	0	0	0	0	0	0	0	0	0	0	0	0	0	0
109	NODE_1390820_length_164_cov_2.53211_g1373406_i0	164	TAGATGCGAAGCACCGACGTGCAATAATAATGACGCGCCGGTGGTAACTATAAGATGGAAGGCGGTGCACCACGTGGGGTGGTCGCAAGTCAGCGCCGGCGCGCGTGCTAACTAGTGCGCCAGGGGTAGTTGGATTAGCACCGGCGAGCGCCCCGGTGAGGCAC	0	0	0	0	0	0	0	0	0	0	0	0	0	0	0	0	0	0	0	0	0	0	0	0	0	0	0	0	0	0	0	0	0	0	0	0	0	0	0	0	0	0	0	0	0	0
110	NODE_1395064_length_163_cov_6.47222_g1377650_i0	163	GTGAAAATCAGTAGCTACGTACAACAGCAACCCCAACAAGCAGGTTCTTGCATATACATGTCCCTGACAGAGAGCAAAACGAGGTGAAGCCGATCAGATCGTCCTGTCCCTTCTTCCTTTTCCCCTTGTCTAGAATCAATAATCAGTCTATGTGAGATGAGAT	0	0	0	0	0	0	0	0	0	0	0	0	0	0	0	0	0	0	0	0	0	0	0	0	0	0	0	0	0	0	0	0	0	0	0	0	0	0	0	0	0	0	0	0	0	0
111	NODE_1403217_length_163_cov_2.76852_g1385803_i0	163	CGGAGATACGGTTCCGTGTACAGTTCCAGTTGTCCCTTCCACCCTCCCTTCTTCGTTGAAAGGACGATGTGTTATGATCCTTGCTTTCAAAATAGCAATCAAATAACACAAGGAGGTACGGTCCCATGAACAGTGTAAGCTAGTCCCTTTCCATCCCCCCTCT	0	0	0	0	0	0	0	0	0	0	0	0	0	0	0	0	0	0	0	0	0	0	0	0	0	0	0	0	0	0	0	0	0	0	0	0	0	0	0	0	0	0	0	0	0	0
112	NODE_1404505_length_163_cov_2.37037_g1387091_i0	163	TTCAGACTAGTCTAGGTCTTCATGGAGTCCTTGTTGTAGTCGTCTTTAACTCATCCGTCTTTGGCCTCCCTGGTGCCGTGGGCCTCCGGCTTGACACGGTTAGCAACTGGGCCGCCTGGCGTAGCTAAGTAGCGTACCACCCGTCTTCGGCCACCCCGGCTTG	0	0	0	0	0	0	0	0	0	0	0	0	0	0	0	0	0	0	0	0	0	0	0	0	0	0	0	0	0	0	0	0	0	0	0	0	0	0	0	0	0	0	0	0	0	0
113	NODE_1412022_length_162_cov_4.29907_g1394608_i0	162	GGAATTTTGGTTATCCCCCGTAACTAATAATTTCATGTCAATTGTAATACATTTAACGAACGCCTAGGCAGATCGACTCAAGGATTAGTTATCCAAGAGTTTAAATAAACATACTACGAACACCACATCAGGTCCTACTCCCGGAAAAGAAGTACAAACCGC	0	0	0	0	0	0	0	0	0	0	0	0	0	0	0	0	0	0	0	0	0	0	0	0	0	0	0	0	0	0	0	0	0	0	0	0	0	0	0	0	0	0	0	0	0	0
114	NODE_1414485_length_162_cov_3.42991_g1397071_i0	162	GCGGAGAAAAGGGTGAAAATCGGCTCTGCGTGTGAAAAATGCGCAGATTTCTTGGTTGTGCCAAGAAAATGTGCTAACTTTGCACCTCGAATGGACCCGAGTTATCTTTTGATGGTTCAAGTCCTTGATCAACGAATAATAATAATATCGATATAAAACAAC	0	0	0	0	0	0	0	0	0	0	0	0	0	0	0	0	0	0	0	0	0	0	0	0	0	0	0	0	0	0	0	0	0	0	0	0	0	0	0	0	0	0	0	0	0	0
115	NODE_1417298_length_162_cov_2.57944_g1399884_i0	162	GCATTATTTACTATTTCCTGTGCTTTTTCATTAGCCTCTTCTTCTTTTTTCCTTAATTCTTCTTCAGAAATAGAATTTAAAGAAGCATCTGCTTCTTTAAAATCTCCCTCCGACGACATATCTACCGAAGAATCAACACCTGTAGAAGCGTATTCTCCTTCC	0	0	1.0554	0	0	0	0	0	0	0	0	0	0	0	0	0	0	0	0	0	0	0	0	0	0	0	0	0	0	0	0	0	0	0	0	0	0	0	0	0	0	0	0	0	0	0
116	NODE_1430819_length_161_cov_2.60377_g1413405_i0	161	GCCATGGCTTTGACTACTCCTTTACGTAGACGATAACGGCGCTACCGTTAGGTTCGCTCGCAGTGTTTACGAACTAGCTACATTCTACAAAACTTCGAGAATTCTCATTACGCACCAAGGTTCATTTTTCTCGAGAAAACGCCAACTCACGAAGAAAGTCA	0	0	0	0	0	0	0	0	2.06208	0	0	0	0	0	0	0	0	0	0	0	0	0	0	0	0	0	0	0	0	0	0	0	0	0	0	0	0	0	0	0	0	0	0	0	0	0
117	NODE_1432623_length_161_cov_2.09434_g1415209_i0	161	CCCAAAAAACGCTTAACTTCCGTGTACCGTTCAATTTTAAGAAGCTTGTGAATCCACATCCTGTTCTTCTGTTTCAGTCTCATCGGAATTTACATTTTCTTCAGATGAACTTTTATTTTCAGTTTGTTTCTTATCTTCTTCTTTTAATTCATCCTTATCGG	0	0	0	0	0	0	0	0	0	0	0	0	0	0	0	0	0	0	0	0	0	0	0	0	0	0	0	0	0	0	0	0	0	0	0	0	0	0	0	0	0	0	0	0	0	0
118	NODE_1439105_length_160_cov_4.37143_g1421691_i0	160	TAAACCTACGCATCCTCTTCCCTAATCCCTTTCAACCCACAATTTCTTCCTCCGGCCCCGTGGCGCGCCCCATAACACTTCCCAAAATCAACAACATGGCGCGCGCCACAGTCGTGATCCTCCTCCTCGTCCTTACCGTCGCCACCGCGGGCGCGAAGAT	0	0	0	0	0	0	0	0	0	0	0	0	0	0	0	0	0	0	0	0	0	0	0	0	0	0	0	0	0	0	0	0	0	0	0	0	0	0	0	0	0	0	0	0	0	0
119	NODE_1444061_length_160_cov_2.80952_g1426647_i0	160	AACCATGAATAAGGCAATAGAGGCACGTACACGCGCTCAACAAGCAGCTGCTGCACGTGCAGAAGCAGAAGCGGCTGCCGCAAAAGCAGCCGAAGAAAAAGCACGTCAGGCCGAAGGTTCAACGTTTACAACAGCATCAGGCAACACCGCTACGGTAGAT	0	0	0	0	0	0	0	0	0	0	0	0	0	0	0	0	0	0	0	0	0	0	0	0	0	0	0	0	0	0	0	0	0	0	0	0	0	0	0	0	0	0	0	0	0	0
120	NODE_1444637_length_160_cov_2.62857_g1427223_i0	160	CACAAAGATAACAGTTATTAAAGAAACTTGTAAAAAGTAGAAATTAGGGCGAGCACATTGATTACTATAAAGTACTCGCCTTAATTTATGGGATTTATGTGCTGCGATTAACGCACGATTATTTATTTGCAACGATCATTTATTAGCTGTTATCTTTGTG	0	0	0	0	0	0	0	0	0	0	0	0	0	0	0	0	0	0	0	0	0	0	0	0	0	0	0	0	0	0	0	0	0	0	0	0	0	0	0	0	0	0	0	0	0	0
121	NODE_1452782_length_159_cov_4.40385_g1435368_i0	159	GTGGAGATGCCGGTGAGGCGGCTTGTTAAGAGCTAGCCCTATCTGACAATCGAGTAGCTATAGGGGTCTGGGAGCAATCCCGGGCTCATAGGGCTTTGAATATGCGTGAATCGGCCGAGGCTGGCAACAGAGCAGGCAACAGCGCAAGCTTGATTGGGC	0	0	0	0	0	0	0	0	0	0	0	0	0	0	0	0	0	0	0	0	0	0	0	0	0	0	0	0	0	0	0	0	0	0	0	0	0	0	0	0	0	0	0	0	0	0
122	NODE_1458538_length_159_cov_2.65385_g1441124_i0	159	TGAAAGGGCTGCGGATACTCTTGCGAGCACGGATATTGTGGTGGGTTCGCAGGGTGCTGCTGGTGAGGCTGGTGCCGGCGGATTCGGTAACGGAACTGGTAACGGATCTGGTAACGGATCTGCCGGAATTGGTGTTGGCTATGCGTTATTGAACGATCT	0	0	0	0	0	0	0	0	0	0	0	0	0	0	0	0	0	0	0	0	0	0	0	0	0	0	0	0	0	0	0	0	0	0	0	0	0	0	0	0	0	0	0	0	0	0
123	NODE_1465278_length_158_cov_5.34951_g1447864_i0	158	TGATGACCACATTCTGGACACTTAATTATCATAAGGTGACTTTAATATTAAATTTACACTCCGTTTTTGTAGACTTAATGCCGCCTTCTATATCTAATTTCACGTATGCTATGCCTTCCTAACAATCTACTCTTGTCAATATATCCATTAACCCCGCC	0	0	0	0	0	0	0	0	0	0	0	0	0	0	0	0	0	0	0	0	0	0	0	0	0	0	0	0	0	0	0	0	0	0	0	0	0	0	0	0	0	0	0	0	0	0
124	NODE_1467247_length_158_cov_4.37864_g1449833_i0	158	ATTGTTTCACAGGGTTGCATCCCTATCCTTCACATTTCACATGAATCTAAACATGCAGTCCATCCAATGGAAAATTTCCTGCGATCGTTCGCGCGTTGAGTAGAGGGAATATATCCCAGTACAGTACATAGAAGCACACACGACGAGAGAAACAAGAT	0	0	0	0	0	0	0	0	0	0	0	0	0	0	0	0	0	0	0	0	0	0	0	0	0	0	0	0	0	0	0	0	0	0	0	0	0	0	0	0	0	0	0	0	0	0
125	NODE_1472888_length_158_cov_2.67961_g1455474_i0	158	GCCTGACCTTGGTTGGCATTATTTGCAGCTGCGGATGCAGGTGCGGATGCAGCTGCGGATGCCGTAAATGTGCTGGAAGATGCCGCCTGATTTGACGCCGCTGTAGGTTGCTGGGGCGCAGCCTGATACGCAGCATATGCGGATGTGTTGATTTTTAC	0	0	0	0	0	0	0	0	0	0	0	0	0	0	0	0	1.94885	0	0	0	0	0	0	0	0	0	0	0	0	0	0	0	0	0	0	0	0	0	0	0	0	0	0	0	0	0
126	NODE_1474946_length_158_cov_2.13592_g1457532_i0	158	GCTAAACGGCGAGCAACAAGAGTGCCAAGGTTATACTTAGTGCTATCATTAAGTGCAACATCAAGAAAAGCTAAATGATAGTTGGATATATTACTTGTGTTTTCCCTACCCAAGATGCTAATAGCAAGATAATAAACTAAATACTTAATTGCAGGAAG	0	0	0	0	0	0	0	0	0	0	0	0	0	0	0	0	0	0	0	0	0	0	0	0	0	0	0	0	0	0	0	0	0	0	0	0	0	0	0	0	0	0	0	0	0	0
127	NODE_1484163_length_157_cov_3.60784_g1466749_i0	157	CTCGTGAATCTAAAAAATGGTTAATATTGGAAAATTGAGTTATATCGCATTCCTGCTTATATGTCGGCTCGATAGTAAATAAGATCCGCTCGATTGAAAGGCTGATATGTCGCGTGATCTATGATTGTCCGGCATGGGGCATCACAAACAGCCGCTC	0	0	0	0	0	0	0	0	0	0	0	0	0	0	0	0	0	0	1.24353	0	0	0	0	0	0	0	0	0	0	0	0	0	0	0	0	0	0	0	0	0	0	0	0	0	0	0
128	NODE_1486665_length_157_cov_2.96078_g1469251_i0	157	GTTAACAGAAACCAGTCTTCAAAGTTTAACCTCTGATCCTCTTTTTCCATTCCATCTTCACTCATTATCAAAACCACTGCATGGCCACGTGAAATGCAAGTAGAGTTTTTACACTCCTCCCACACTTCAACGCTTCATCTCGACGACTTCGCTTCCC	0	0	0	0	0	0	0	0	0	0	0	0	0	0	0	0	0	0	0	0	0	0	0.648005	0	0	0	0	0	0	0	0	0	0	0	0	0	0	0	0	0	0	0	0	0	0.677165	0
129	NODE_1487573_length_157_cov_2.69608_g1470159_i0	157	TCCCGTAGAAGACGCCACATCGCCAGTAAACGAGTTGGACGCCAATCCGGTGGAAGATGACACGCCAGTGGACGAGGAGGAGTCACCGGTGGACGACGAGTTGGAAGCACCTCCAGTGGACGACGACGACACATCTCCGGTGGACGACGAATTGAAA	0	0	0	0	0	0	0	0	0	0	0	0	0	0	0	0	0	0	0	0	0	0	0	0	0	0	0	0	0	0	0	0	0	0	0	0	0	0	0	0	0	0	0	0	0	0
130	NODE_1500684_length_156_cov_3.18812_g1483270_i0	156	CGTAGCTGTGTGGCCAAATAATAATAGTACACCAATACGGGCAGACCGAAAGGGCGAGGACGCTTGAAAATCCCATTTCCAAGATTTTATACACCACATAACAACGCACGCCATAGCTAGCTAGCAGCAACCTACGGCAACGTCGCAGGCTGCAGC	0	0	0	0	0	0	0	0	0	0	0	0	0	0	0	0	0	0	0	0	0	0	0	0	0	0	0	0	0	0	0	0	0	0	0	0	0	0	0	0	0	0	0	0	0	0
131	NODE_1509584_length_155_cov_5.45_g1492170_i0	155	TCAGGAGCCCCGCCTGCTGGCCCTGCGCCGCGCAGACGGCGGTGAGGGCGAGGAGCGCCGCGGCGACGCGGAGGAGAGGCTGCGCCATTGTAAGAGAGAAGATGGCCCTCATTCTTCCTTTATTCCTAGTATAATCTTTGTGGAGAATGGAGTGG	0	0	0	0	0	0	0	0	0	0	0	0	0	0	0	0	0	0	0	0	0	0	0	0	0	0	0	0	0	0	0	0	0	0	0	0	0	0	0	0	0	0	0	0	0	0
132	NODE_1515080_length_155_cov_3.38_g1497666_i0	155	AATCGCAATAACGTTCTTCGTAGCATGCAGCTCAAGAATGCCGGCTAACGCTCTACGCTCCTGGCTCTCGGAGACAAGTACAAGAGCTGTATGCCGCTCTGGAAAAAATGCTTAACTACTTAGAAGCTCGACTGCAACACTCTCCACCTTCGGCG	0	0	0	0	0	0	0	0	0	0	0	0	0	0	0	0	0	0	0	0	0	0	0	0	0	0	0	0	0	0	0	0	0	0	0	0	0	0	0	0	0	1.24576	0	0	0	0
133	NODE_1518653_length_155_cov_2.51_g1501239_i0	155	CCTAGGCCGCATTGGTACGGATATTTATAATATACACTAGTGTTATTGTGTGGTTGAATGTATGTAAAATTAAATTGAAAGAAAAATGAATGAAGAACTACGTTAAAGTATCATAGTCTGCAACGGAAGTGACTAGCCAAAACGCAGTCAGTGTG	0	0	0	0	0	0	0	0	0	0	0	0	0	0	0	0	0	0	0	0	0	0	0	0	0	0	0	0	0	0	0	0	0	0	0	0	0	0	0	0	0	0	0	0	0	0
134	NODE_1529015_length_154_cov_3.72727_g1511601_i0	154	CTCGTCGTTTTCATGTTTTATGGCCGTTTCGTGGTCTATTCCACACTGTTTTGGGGTCCTGACGCCTTTTCTAGGGCCCGTGACTCCCGGTAAACGATTTTAGGGCGACGTTAAAAACTCGTCGTTTTCATGTTTTATGGCCGTTTCGTGGTCT	0	0	0	0	0	0	0	0	0	0	0	0	0	0	0	0	0	0	0	0	0	0	0	0	0	0	0	0	0	0	0	0	0	0	0	0	0	0	0	0	0	0	0	0	0	0
135	NODE_1548314_length_153_cov_2.80612_g1530900_i0	153	GCGCTTGCTGGAGTGGATCAGGAGGCGTGATCGTCTAAGGGGAATGAACCGAAGAAGGGTGTGTGGGGGGTCGAGATCGACGGAGACGGTGACAGCGGTGGTGATCCGGTCCGAGGAGAAGGCCTTGGAGATCGTGGGATCCAAACTCCAAAG	0	0	0	0	0	0	0	0	0	0	0	0	0	0	0	0	0	0	0	0	0	0	0	0	0	0	0	0	0	0	0	0	0	0	0	0	0	0	0	0	0	0	0	0	0	0
136	NODE_1552861_length_152_cov_9.72165_g1535447_i0	152	TTACCGGATAGTGCGATGAAACTCCGAGATAATATGATTTGAGCGTTCCCTCTCTTTGTAATCCGCTAACATAATTTACCTCCGAAGAGGGGCGGCACGCCATCAAGTAGAGAAACTGACTCGGCATTTCTGAATTAATTGATGAGTTTCCC	0	0	0	0	0	0	0	0	0	0	0	0	0	0	0	0	0	0	0	0	0	0	0	0	0	0	0	0	0	0	0	0	0	0	0	0	0	0	0	0	0	3.59386	0	0	0	0
137	NODE_1564039_length_152_cov_2.84536_g1546625_i0	152	GATTTGCGTCTCCGTCACCAGCCACGGCGCGGGCGCCCCCCAGGACCCGTTCCTCACCGTCTACGGTCCCTCCACGGCAGTGCCGCCGGTGGGATGCAGCGGCCCCATCGCCCAGGCCGACGACACTTTCGGTCATGACGACAGCCTCGACG	0	0	0	0	0	0	0	0	0	0	0	0	0	0	0	0	0	0	0	0	0	0	0	0	0	0	0	0	0	0	0	0	0	0	0	0	0	0	0	0	0	0	0	0	0	0
138	NODE_1566736_length_152_cov_2.27835_g1549322_i0	152	GGTCGTTACTCATGCGGGTAACTGACATCATTTTCTTTCTGTAGTGGTCGTTACACATGCGGGTAACCGACATCATTTTCTTTCTGTAAGTGGTCGTTACTCATGCGGGTAACCGACATCATTTTCTTTCTGTAAGTGGTCGTTACTCATGC	0	0	0	0	0	0	0	0	0	0	0	0	0	0	0	0	0	0	0	0	0	0	0	0	0	0	0	0	0	0	0	0	0	0	0	0	0	0	0	0	0	0	0	0	0	0
139	NODE_1578332_length_151_cov_3.33333_g1560918_i0	151	CCCTAGTATATCTATGGTATAACGTGGAGTATACATACATGTACGGGGAACATTGTGTATACAATACATAGAAGCATTAGTTACAAATTTTATCTGCGGGTGCACGTGTGCGTTCATACATACATGTTGGCAGCAGCTTCTCGGATCTTAA	0	0	0	0	0	0	0	0	0	0	0	0	0	0	0	0	0	0	0	0	0	0	0	0	0	0	0	0	0	0	0	0	0	0	0	0	0	0	0	0	0	0	0	0	0	0
140	NODE_1581097_length_151_cov_2.69792_g1563683_i0	151	GCTGCTCGTGTCTGCATTCTCACTAATCAGCGCTCCACCTTCCGTTTCCGTCCGGCTTCACTGCACTGATTACGCTCTTCTACCACTCCACATCCTCGAAAGGTTATGAAATCCGCAGCTTCGGTATGTAGTTTAATAGATCGGAAGAGCA	0	0	0	0	0	0	0	0	0	0	0	0	0	0	0.686051	0	0	0	0	0	0	0	0	0	0	0	0	0	0	0	0	0	0	0	0	0	0	0	0	0	0	0	0	0	0	0
141	NODE_1587149_length_150_cov_6.50526_g1569735_i0	150	GTCGCATATCCTCCGAGTGGGTACCCTGCAGGGTATCCGCAATACCCTACAACCTATCCTCCAGCTGGCTACCCTAGTCATGGGCCACCAATGCCAGTTCCTCTATATGGTCATAGTGCTATGCATGGAGGCGGTCATGGTGTAGGCGGG	0	0	0	0	0	0	0	0	0	0	0	0	0	0	0	0	0	0	0	0	0	0	0	0	0	0	0	0	0	0	0	0	0	0	0	0	0	0	0	0	0	0	0	0	0	0
142	NODE_1591111_length_150_cov_4.34737_g1573697_i0	150	CCTCGCTCGATCTTCTTCCTCGACGCGCACGTTACGAGAACGCAATCAACGATGGTTAGCCGCCCATAAAACGCGCGCATGGGCTGAATCGCGGTTTCTTGCGTGCTGTCTTTCCGCCGCCAATCGATCAATCCAGAGAGCCGTTCTTGG	0	0	0	0	0	0	0	0	0	0	0	0	0	0	0	0	0	0	0	0	0	0	0	0	0	0	0	0	0	0	0	0	0	0	0	0	0	0	0	0	0	0	0	0	0	0
143	NODE_1595271_length_150_cov_3.26316_g1577857_i0	150	GTGGAATCAATCAAATGCAAAGCTCCGTAGAACTTAACACCCATTACACTTCAATGATAGCAGCATTACGGATTTGCCTATAATGCTCATCTATGTGCTTAGCTTAGCAATCCAATATCCAAGTTAACGTATCCTTCTGCGTCACCCCAT	0	0	0	0	0	0	0	0	0	0	0	0	0	0	0	0	0	0	0	0	0	0	0	0	0	0	0	0	0	0	0	0	0	0	0	0	0	0	0	0	0	1.11288	0	0	0	0
144	NODE_1596858_length_150_cov_2.90526_g1579444_i0	150	GCACACTTGAGTTAATCTAGGCAGAACATCACAAATAAACTCTAGGCCGACAACCTAAATATTTGTCGGTCAAAAATACAGAAAAACATACCGAGCAGTGTTGTTATAAGCTTGGTCCAACGGAAAACAACATAATCCGTTAGAATAAAA	0	0	0	0	0	0	0	0	0	0	0	0	0	0	0	0	0	0	0	0	0	0	0	0	0	0	0	0	0	0	0	0	0	0	0	0	0	0	0	0	0	0	0	0	0	0
145	NODE_1601571_length_149_cov_20.6809_g1584157_i0	149	GCTCTTCCGATCTAGCACATCCCATCACACGGCTTTGCCCGTGCATGTGCGGCCCGCACAACGTAGCAACCCTAACTGGAAATCATCCACCTAGAATCGATCGGCCGATCATATTGCAGCGTATGACACATACGCCAGAGATCGGAAGA	0	0	0	0	0	0	0	0	0	0	0	0	0	0	0	0	0	0	0	0	0	0	0	0	0	0	0	0	0	0	0	0	0	0	0	0	0	0	0	0	0	0	0	0	0	0
146	NODE_1607450_length_149_cov_4.57447_g1590036_i0	149	AGATCTGTGACCTTAGCCCGCTTGCCTTGGGGTGTGGGAGGCTCTCGGATGGAGGGGGAGGCTCTTGCCTTGTGGGAGTGGTCGTTTTCTCGGGGTGCATTGTTTCTGCCTTGTTGCAGGGCGCTCGTGAGAGGGGACAGAGGGCTAAG	0	0	0	0	0	0	0	0	0	0	0	0	0	0	0	0	0	0	0	0	0	0	0	0	0	0	0	0	0	0.331247	0	0	0	0	0	0	0	0	0	0	0	0	0	0	0	0
147	NODE_1609566_length_149_cov_3.91489_g1592152_i0	149	CTAAAGTTTATTCAAGTGACTAGATCAAACAACTTGAGAGCAAACAATAAAACTCATGAGGTCATTAATAATAAATCTTGGGACTATGCACATAAAACTAAGAATGATAAGAATTGCTCTCCTAGTTAATGCATAAAGTAAGAAGATGG	0	0	0	0	0	0	0	0	0	0	0	0	0	0	0	0	0	0	0	0	0	0	0	0	0	0	0	0	0	0	0	0	0	0	0	0	0	0	0	0	0	0	0	0	0	0
148	NODE_1610665_length_149_cov_3.60638_g1593251_i0	149	CCCTACACGACACTCTTCCGATCTGTGCAGATTTGAGAGTTTAACGCAGCAAGCCTTACCGCCATTCACGGCTCGTAAGAGTCATGCATGCACTCTCGAATCATATCATTGCTCATTGATATTTGTTTTTGTAGATTGCTTGCCACATG	0	0	0	0	0	0	0	0	0	0	0	0	0	0	0	0	0	0	0	0	0	0	0	0	0	0	0	0	0	0	0	0	0	0	0	0	0	0	0	0	0	0	0	0	0	0
149	NODE_1611828_length_149_cov_3.3617_g1594414_i0	149	TATCAACAAGCCAACACATGTCATGCAACAGACACTTCATGCAATATTACTTCAGAGATCATACCAACAAACATGAATAGCATAGTATGAAGAGTATTCCAATCTAGATTACAATCCCCATCTGTCACCTAGAGATCATATCATAAGAG	0	0	0	0	0	0	0	0	0	0	0	0	0	0	0	0	0	0	0	0	0	0	0	0	0	0	0	0	0	0	0	0	0	0	0	0	0	0	0	0	0	0	0	0	0	0
150	NODE_1624476_length_148_cov_4.76344_g1607062_i0	148	GCGGGAGGTTCACGCGCATGTCCTTCGCCGCGGCCGCCTGGCAGGTCGTCGTCGCCACCGCCGCATCCACCCTGCAGGCGCTGCCGAGAATCAACGCCAGCACCGCGGCGACAAGGGGGGTAGTCTTCTTCGAGAGATCGGAAGAGCA	0	0	0	0	0	0	0	0	0	0	0	0	0	0	0	0	0	0	0	0	0	0	0	0	0	0	0	0	0	0	0	0	0	0	0	0	0	0	0	0	0	0	0	0	0	0
151	NODE_1625680_length_148_cov_4.35484_g1608266_i0	148	CATCGCTTGCAGCTTAGAGTGGCATTGAGCAAGCGCGAGTTGGGTAACCGATATGGGCCCTCCTTTAAATTAACTCGCTGTCTTGTTTATTGCTCGCTTTAGGAAAACGTTCAAGAGAGCTGAAGGATTTGATAGATCGGAAGAGCGT	0	0	0	0	0	0	0	0	0	0	0	0	0	0	0	0	0	0	0	0	0	0	0	0	0	0	0	0	0	0	0	0	0	0	0	0	0	0	0	0	0	0	0	0	0	0
152	NODE_1626101_length_148_cov_4.22581_g1608687_i0	148	ATCTGCCGTCATAGTATCCCTCCGATCCTCGGCGTCTCTCCCACTCTCCTGTACGGGCTTCCCCCTCCGGATTCTAGGTGGTGGGGTAGATCGATCAACGCGGCGCCGGCGGTCGATCGATGGGGTGCATTCGGCGGGGGCGTTGGAA	0	0	0	0	0	0	0	0	0	0	0	0	0	0	0	0	0	0	0	0	0	0	0	0	0	0	0	0	0	0	0	0	0	0	0	0	0	0	0	0	0	0	0	0	0	0
153	NODE_1627092_length_148_cov_3.92473_g1609678_i0	148	CTCGGAGTCATCATCGTCTTTGTTTTTCGACTTCTTCTCTTTCTTCTCTCCATCGGTGTCCTCGGAGTAGTCGAGCTTACTCTTAGATTTCTTCTCTTTGGCATGATCCTCAGCGTCGTCAGTCGTGTTCTTTGGTTTGCTCAGATCG	0	0	0	0	0	0	0	0	0	0	0	0	0	0	0	0	0	0	0	0	0	0	0	0	0	0	0	0	0	0	0	0	0	0	0	0	0	0	0	0	0	0	0	0	0	0
154	NODE_1637186_length_148_cov_2.13978_g1619772_i0	148	GACCGTCTCCGCAAACACGTTCTACCACATGCCGACTCTAAATTCGTCGCCGCAGTAAAACGATCGCTCCCCTATGAACTCGAGGGTGAACTCGCACCTCCGCTCCGCTTCACTATCGACTCCTTCTTCTCCCGCTACTCTCCTTCCC	0	0	0	0	0	0	0	0	0	0	0	0	0	0	0	0	0	0	0	0	0	0	0	0	0	0	0.713985	0	0	0	0	0	0	0	0	0	0	0	0	0	0	0	0	0	0	0
155	NODE_1637955_length_147_cov_17.8696_g1620541_i0	147	GTCATGTGCTGGTTGAGCTACGCGGTGGTGGCTGTAATCTTTAATCCTTGATTTTGTAAGCTACACGTGCATACCGCGCGTGGTACCACCACGACACGAGATACCTCGCGGTTCTCGTGCGTTTGGTGCGCCTTCAGATCGGAAGAG	0	0	0	0	0	0	0	0	0	0	0	0	0	0	0	0	0	0	0	0	0	0	0	0	0	0	0	0	0	0	0	0	0	0	0	0	0	0	0	0	0	0	0	0	0	0
156	NODE_1650381_length_147_cov_3_g1632967_i0	147	ACTGACTTTGATTTACTCACAGATGGGCCATTCATATAGTGGCTCCATATGTCAGTGACTCAAAGTCAACTTGCTGTGTGAGCGTATCTTGTATCGAGTGAGCTGTAGACTGAAAAGATTAAATCTCAACATGGAGAACCGAAGGAG	0	0	0	0	0	0	0	0	0	0	0	0	0	0	0	0	0	0	0	0	0	0	0	0	0	0	0	0	0	0	0	0	0	0	0	0	0	0	0	0	0	0	0	0	0	0
157	NODE_1651131_length_147_cov_2.86957_g1633717_i0	147	AAGGCAAATTATTCTAGTAAATCAAATAATATCGCGAGTGTTGGGTATTATGGGGTTGGTAGGGATTAGTGCATGCGGGGTGTGTGTAAATTGGCTCGTTGTAGGCCAATCAATCCGATATGAATGTGGTTTATGTTTTGTTTTAAC	0	0	0	0	0	0	0	0	0	0	0	0	0	0	0	0	0	0	0	0	0	0	0	0	0	0	0	0	0	0	0	0	0	0	0	0	0	0	0	0	0	0	0	0	0	0
158	NODE_1651221_length_147_cov_2.8587_g1633807_i0	147	CTCTAATTGTTTTCATTTTTGTACATATACTCATCTATATGGACATGCCTAGTTTGTTCGTGTAAGGTGTATGTTATTTAATGGATGCTTAGTGGTTCTAACTCTCTCATGATTAGATTCAACTTGATAGTAGTTTGCAACTTGTCA	0	0	0	0	0	0	0	0	0	0	0	0	0	0	0	0	0	0	0	0	0	0	0	0	0	0	0	0	0	0	0	0	0	0	0	0	0	0	0	0	0	0	0	0	0	0
159	NODE_1654296_length_147_cov_2.5_g1636882_i0	147	TAAAATTTCTATCAATGTTGAATAATGGGAAATATTACATATTTTCTATTTATCATAATCTTCATTATATCACAAACGATCAGTTATCAGCCAATTAATATCCTTACTTAGAAATAACTTAATACATATCTTATCACACTATTATTT	0	0	0	0	0	0	0	0	0	0	0	0	0	0	0	0	0	0	0	0	0	0	0	0	0	0	0	0	0	0	0	0	0	0	0	0	0	0	0	0	0	0	0	0	0	0
160	NODE_1657238_length_147_cov_2_g1639824_i0	147	CCTTGGTACCAGAGCTTCTTTGACCAGCTCTTGAACCAATTCCGCCAGCAGAATCAGTGGTACTAGCAAAATTACCTTGACCATGAGAAGAAGTACCCAAATCATCAGAGTAGTTTGATGAACCTTTAGAACCTTGGTTCAAGTTAC	0	0	0	0	0	0	0	0	0	0	0	0	0	0	0	0	0	0	0	0	0	0	0	0	0	0	0	0	0	0	0	0	0	0	0	0	0	0	0	0	0	0	0	0	0	0
161	NODE_1657427_length_147_cov_2_g1640013_i0	147	GCAGAGTTGTACCGAGTGTGTACCCAGGTATAACGAGAAGTAAAAGTCCGTAGAGATATGCAATAAGAAGTGATGTCATCGGCTCATTCCTTGTAATAGATCTCGTCAAATTTTGACGCTTGCGATAATTTGATACGTTTAAATTGG	0	0	0	0	0	0	0	0	0	0	0	0	0	0	0	0	0	0	0	0	0	0	0	0	0	0	0	0	0	0	0	0	0	0	0	0	0	0	0	0	0	0	0	0	0	0
162	NODE_1657973_length_146_cov_12.9341_g1640559_i0	146	TGCTCTTCCGATCTGCACACCAATGGTGAGACGGTGGCCGATTGTGCGGCACTGCACAATAAGCAACAACAAACAATGATCCAGCTTAAAATCATTGTCACCTGATTACCTCAGCGTATGACACATGCGCTCAGATCGGAAGAGCG	0	0	0	0	0	0	0	0	0	0	0	0	0	0	0	0	0	0	0	0	0	0	0	0	0	0	0	0	0	0	0	0	0	0	0	0	0	0	0	0	0	0	0	0	0	0
163	NODE_1660688_length_146_cov_6.13187_g1643274_i0	146	CTGGAATGCGACGATATCTCGCTCTATGTGTTTTCGCGTAGCGATAGGCTTCGGCCGAACACCTAATTCAAACGCCTTAAGGGCACGTTGAGCGTTAAATCCTCTGTAGACGACTTTGATATAGAACGGAGTATTGTACGTATGAG	0	0	0	0	0	0	0	0.322727	0	0	0	0	0	0	0	0	0	0	0	0	0	0	0	0	0	0	0	0	0	0	0	0	0	0	0	0	0	0	0	0	0	1.17324	0	0	0	0
164	NODE_1670204_length_146_cov_3.03297_g1652790_i0	146	GGGCCAGGACGCTACCCGCGTGGATCAGGATGACACGGACCCGGATGACGCGGAGGAGCAGGACCACTTCGACGAGAAGGCGCGTCGGGCTCTTTCCAAGACTCGCCGGGAGGCCGCTAACCTGCGGACCCGCCTCAAGGCGGAAG	0	0	0	0	0	0	0	0	0	0	0	0	0	0	0	0	0	0	0	0	0	0	0	0	0	0	0	0	0	0	0	0	0	0	0	0	0	0	0	0	0	0	0	0	0	0
165	NODE_1672671_length_146_cov_2.71429_g1655257_i0	146	TTTGATTTTTGTATATTTCTAGTATAACTATTAATAAGGATAAGCCAGAAGATTATTTGTGGGTTGATTAAAAATAATAATGTTCTGGGGGAAAAGCCTGTTTCCTATCTATCTAAAGTCTAACTAGAATCTTACCTCAAATCAAA	0	0	0	0	0	0	0	0	0	0	0	0	0	0	0	0	0	0	0	0	0	0	0	0	0	0	0	0	0	0	0	0	0	0	0	0	0	0	0	0	0	0	0	0	0	0
166	NODE_1676906_length_146_cov_2.02198_g1659492_i0	146	TTTGAGTATAAAACTTATTCTATAAATTCAATTTGAGTGAAACCTTTTGCATCTGAAAGCTATTGTTAATATCTATCCAGAGAACCTATTCCCAAATTTTTATTTGAATATTTGGAGATAAAAGTAGATTTAATCTAAGATTAGGC	0	0	0	0	0	0	0	0	0	0	0	0	0	0	0	0	0	0	0	0	0	0	0	0	0	0	0	0	0	0	0	0	0	0	0	0	0	0	0	0	0	0	0	0	0	0
167	NODE_1676938_length_146_cov_2.02198_g1659524_i0	146	CACAGGCCCCAGCACCCACGCACACCTTTCTACCCCAGCCCGCATCCGCCTATGGGATGACGGGGGGTGGGATGGTCATGCACGACCCCAACGTCATCGACTATGCACCCGTGCAGGCACATGCCGTCAACCACGCGATGCACCCC	0	0	0	0	1.25522	0	0	0	0	0	0	0	0	0	0	0	0	0	0	0	0	0	0	0	0	0	0	0	0	0	0	0	0	0	0	0	0	0	0	0	0	0	0	0	0	0
168	NODE_1677041_length_146_cov_2.02198_g1659627_i0	146	CTTCACACTAATCTTAGAATAAACTTTAAATTCTCTAAGCTAACACAATGCTTGACATATAGGTTTCCAGTGAAAACTTGCTAGATGAATTAAGGTATGCCTATGTGGCTTAGGATTTGAAACAGTTACTGACATGACCTACGAGC	0	0	0	0	0	0	0	0	0	0	0	0	0	0	0	0	0	0	0	0	0	0	0	0	0	0	0	0	0	0	0	0	0	0	0	0	0	0	0	0	0	0	0	0	0	0
169	NODE_1677150_length_146_cov_2.02198_g1659736_i0	146	TCAAGATCAGAAACGACTGCCCCCTACTTTCTCTATAGGCGACTGCTACTGTAGGCTATGACTCTGGATATGCTGCTGTCTCCCTTTAGAATAGTAGGGCATATGCTTTTGGTGCTGCTAGCTATGGCTATGGATCTTTAACTGCA	0	0	0	0	0	0	0	0	0	0	0	0	0	0	0	0	0	0	1.24353	0	0	0	0	0	0	0	0	0	0	0	0	0	0	0	0	0	0	0	0	0	0	0	0	0	0	0
170	NODE_1677196_length_146_cov_2.02198_g1659782_i0	146	CACAAGAGAACCGAGTCATGGCCGCTGGTCTGACATCCTTTCCCCCTGTCCTCTAGTCCTTTCCCCTAGTCCAAACACCGATACACTAGGTGAATACAGAGCCCAGCATCCCTGATCCAATCCATTGCTTTACCAGAGAATAATTC	0	0	0	0	0	0	0	0	0	0	0	0	0	0	0	0	0	0	0	0	0	0	0	0	0	0	0	0	0	0	0	0	0	0	0	0	0	0	0	0	0	0	0	0	0	0
171	NODE_1677399_length_146_cov_2_g1659985_i0	146	GGACGATCCAGCACTGGTCGATCTTCGGGCGTTAGCCTTCGCTCGACCTCACATCGCCCGTCGTGCCCGAAGGCATGGCGGGCGATGCCCGTTGTGGCCCGATCTCCGGGCGAACCCGGCTCGCTGCCACTGACGCCAACCCCGGC	0	0	0	0	0	0	0	0	0	0	0	0	0	0	0	0	0	0	0	0	0	0	0	0	0	0	0	0	0	0	0	0	0	0	0	0	0	0	0	0	0	0	0	0	0	0
172	NODE_1679187_length_145_cov_7.66667_g1661773_i0	145	CTTCCGATCTCCGCTGCCACCGCAGTTTCCGCCGGTATCAAGCAACTACCCTATGTTGGGGGAGTTCTCGGTGGAATGTTTGATTCACTATTCGGTTGAAACCACCACAAGTTTTAGACCCTAGAAAAGGTCTCCCAGTTAAAAG	0	0	0	0.499545	0	0	0	0	0	0	0	0	0	0	0	0	0	0	0	0	0	0	0	0	0	0	0	0	0	0	0	0	0	0	0	0	0	0	0	0	0	0	0	0	0	0
173	NODE_1683907_length_145_cov_4.5_g1666493_i0	145	GGAGTGTAGTTTATGATTCTAGAACTAAGTTTTAAAAGAGATGACGATAAAGTATTAAAGCTTGATGGAAATTACAAAAACGATGCTTTCTTTGGGATTACCAGTCTTGCTGGAATAGGAGAGATAAAATAGATCGGAAGAGCGT	0	0	0	0	0	0	0	0	0	0	0	0	0	0	0	0	0	0	0	0	0	0	0	0	0	0	0	0	0	0	0	0	0	0	0	0	0	0	0	0	0	0	0	0	0	0
174	NODE_1686121_length_145_cov_3.84444_g1668707_i0	145	CCACGCTCACATCAGGGTCCCGTCCATCCCTCCGCGAGCCTGGCAGCCTTAACCGTTCCCCCCTCGGAACGGGAAAAGCCCAAGGTGTTCCGCCTCGCGGCGGCGCGGGCCCTTGCGGGCCCGCCCTTCGGGGGCCCCGTTTCCG	0	0	0	0	0	0	0	0	0	0	0	0	0	0	0	0	0	0	0	0	0	0	0	0	0	0	0	0	0	0	0	0	0	0.940823	0	0	0	0	0	0	0	0	0	0	0	0
175	NODE_1689875_length_145_cov_3.06667_g1672461_i0	145	TCTGTGCTCTTTCTGTTGCATTTTGCTAATATTTTGTCTTTTAAGGACAAGCAGACAGTCTTCTCTACCTCTGCTACAGGGCAGTGAAGTTTGAATGTTCTCTAATAATGCTATAATTAGAAATATTAGGAGCAGTATACTGCGG	0	0	0	0	0	0	0	0	0	0	0	0	0	0	0	0	0	0	0	0	0	0	0	0	0	0	0	0	0	0	0	0	0	0	0	0	0	0	0	0	0	0	0	0	0	0
176	NODE_1689965_length_145_cov_3.05556_g1672551_i0	145	GCCACTTACATTCATCGATAAATAATTATCGATGATAACCTAGCAGGGACCTATAAGTAAGTATACTTTCAACCTCGAACCAATGAAGACAAAGCCTACATAACTTGGTTGTGTAAACAACCATTTGAATTACAAGTCAAATTCG	0	0	0	0	0	0	0	0	0	0	0	0	0	0	0	0	0	0	0	0	0	0	0	0	0	0	0	0	0	0	0	0	0	0	0	0	0	0	0	0	0	0	0	0	0	0
177	NODE_1690252_length_145_cov_3_g1672838_i0	145	GCTCGTTATACTCAATTTGTGCCTACAGGATTTTCACCTTCTATGACGCTACTTTCCAGCAGCTTCAGCTTGATGAGTACTTCTAAATGCAGTCCTACAACCCTCGTGCAGCACGCTACACAAGTTTGGGCTCTTCCCTTTTCGC	0	0	0.570547	0	0	0	0	0	0	0	0	0	0	0	0	0	0	0	0	0	0	0	0	0	0	0	0	0	0	0	0	0	0	0	0	0	0	0	0	0	0	0	0	0	0	0
178	NODE_1693924_length_145_cov_2.55556_g1676510_i0	145	GAAAGACTAAGGGTTCCCCGGCGATGGCAGTCATCCGGGGGTGAGTCGGGGCCTAAGGGTCAGCCGAAGGGCGTGATCTGATGGACAGCTGGTTAAGATTCCAGCACTTGTATCAACTGTGAAGCGGGGACGAAACGCTGGGGGC	0	0	0	0	0	0	0	0	0	0	0	0	0	0	0	0	0	0	0	0	0	0	0	0	0	0	0	0	0	0	0	0	0	0	0	0	0	0	0	0	0	0	0	0	0	0
179	NODE_1694287_length_145_cov_2.5_g1676873_i0	145	GTCTGCGTGGCGTTCATTGCGTTCGTCGCGTGCGTCGTTCTCACGTTCTGCTGCGTCTAATTCTGCTTGGTATGCGCGGTATCCATCGTATGCATAATCTTGTTCAGAATATGCATTATCAAAATCTACCGTCATACGGCTTTCG	0	0	0	0	0	0	0	0	0	0	0	0	0	0	0	0	0	0	0	0	0	0	0	0	0	0	0	0	0	0	0	0.625804	0	0	0	0	0	0	0	0	0	0	0	0	0	0
180	NODE_1696845_length_145_cov_2.04444_g1679431_i0	145	CTTTAGACATAGTTTCCCCCAGCTCTCCGAACATACTTCAAATAATTGATTCATACCCTTTGTCTTGCAAGTGCAATGTCTTTGTTTCCCTAGGGACAGTTCCTGCTACCCGCTTTTCCCCTCAGGTATAGACCACATTTTCCTG	0	0	0	0	0	0	0	0	0	0	0	0	0	0	0	0	0	0	0	0	0	0	0	0	0	0	0	0	0	0	0	0	0	0	0	0	0	0	0	0	0	0	0	0	0	0
181	NODE_1696858_length_145_cov_2.04444_g1679444_i0	145	CGTACACATGCACACGCTGCTTGCAGCAATGTGCCAATAAGCGCTAGATAATGGCGACTTGTAGTTCGTGTGGTGTCCGAGACTCAAGCATTGGCCACTCTTTGGCAAGTGAGCTTGCACTGACAAGTGTCGCGGTAGCTTGACT	0	0	0	0	0	0	0	0	0	0	0	0	0	0	0	0	0	0	0	0	0	0	0	0	0	0	0	0	0	0	0	0	0	0	0	0	0	0	0	0	0	0	0	0	0	0
182	NODE_1696967_length_145_cov_2.04444_g1679553_i0	145	GAAACTCGAGACACTCGCGGCCGCGGCGAGGGGTTCTCACCCCAGGCGGGAGAGTCGACGCGGGCGCCACCGGACCCAACGCCGCAGGCACAGCAGGGGCCGACTTCTTCTTATTTTTCTTGTTTTTCTTCTTTGCGGCTTCAGA	0	0	0	0	0	0	0	0	0	0	0	0	0	0	0	0	0	0	0	0	0	0	0	0	0	0	0	0	0	0	0	0	0	0	0	0	0	0	0	0	0	0	0	0	0	0
183	NODE_1697278_length_145_cov_2.03333_g1679864_i0	145	GCCAGTGCTGGACTCACTGATATTGATGAAACCCTCGTAGGAGCCCCTAATGGAGCATGCTTTTCCAGAGCTCCCTCGGTGTGAGCAAGGAGAAGAAGGACTGCGGCGAATGGAAAAAGCTTGCATGATGACTCCATTATTTGAT	0	0	0	0	0	0	0	0	0	0	0	0	0	0	0	0	0	0	0	0	0	0	0	0	0	0	0	0	0	0	0	0	0	0	0	0	0	0	0	0	0	0	0	0	0	0
184	NODE_1705458_length_144_cov_4.1236_g1688044_i0	144	CTCAAGTCTGAGTGGCGAGTACAAGAGTACAGGGTGGACATAGTAAGACCTTGATGGTCAGGGTAAATAAACAGCGCCACAGACAATTAACACCCACGAAAACATTCTGATAGCTAGCTCTTTGACAAGGAGCTTTATCTTTCC	0	0	0	0	0	0	0	0	0	0	0	0	0	0	0	0	0	0	0	0	0	0	0	0	0	0	0	0	0	0	0	0	0	0	0	0	0	0	0	0	0	0	0	0	0	0
185	NODE_1709611_length_144_cov_3.23596_g1692197_i0	144	CTTACTGTCACGTGAGAAACCTGGCGTCCATCATCCCGAGGCCGCCCGCCTGCCTCACCAACCTCCCCGTAGTAGCCAGCCACCCACCACGGCCTCATCCTCCGCGCACGCCCTCCTCAGCCCGCCCGGGCCCCGATACCTGTG	0	0	0	0	0	0	0	0	0	0	0	0	0	0	0	0	0	0	0	0	0	0	0	1.34892	0	0	0	0	0	0	0	0	0	0	0	0	0	0	0	0	0	0	0	0	0	0
186	NODE_1710181_length_144_cov_3.10112_g1692767_i0	144	CTGTGCTTCAGCCGTTAGGCTTAGGCGGCGAGGGCCAGCTCCTGTGCCATCACTGGCAGGTTATCGTTCGCGGTTGCGAGCTTGCCAGCTTACGGGCTGACCACACGGATCGCGCTCAGATCTTCTCTACCCAGTCGATCCTGG	0	0	0	0	0	0	0	0	0	0	0	0	0	0	0	0	0	0	0	0	0	0	0	0	0	0	0	0	0	0	0	0	0	0	0	0	0	0	0	0	0	0	0	0	0	0
187	NODE_1715456_length_144_cov_2.42697_g1698042_i0	144	CGCGATCAAGATATCCTCCTACAAACCGGGTCCATGGGATTTAAATACGGGACTTTTTGGTCCGGTTGGGTTCTTTCGGGAACCGCGTAGAACACTTCAGCGCCATCAATTTTAGGGGCAGATAGATTAGGTAGGTAAGTTGTT	0	0	0	0	0	0	0	0	0	0	0	0	0	0	0	0	0	0	0	0	0	0	0	0	0	0	0	0	0	0	0	0	0	0	0	0	0	0	0	0	0	1.116	0	0	0	0
188	NODE_1717290_length_144_cov_2.06742_g1699876_i0	144	TGTAACTAACAGGCCCGACCGCGTCGTGCTACCTCCCGACGGGGAGAGGAGCGCGGACAAGGGCAGCACCGAGATCCCGCACCTCGAAACTCCCAGGGGGCAATTGGTGCAGAGGAATCGAACTAACCCTAGGTGGGTTGGGAG	0	0	0	0	0	0	0	0	0	0	0	0	0	0	0	0	0	0	0	0	0	0	0	0	0	0	0	0	0	0	0	0	0	0	0	0	0	0	0	0	0	0	0	0	0	0
189	NODE_1717328_length_144_cov_2.06742_g1699914_i0	144	CAAAGAACGGACAGCGCGGATGGCAAACAAATGGTAAGATGGCAGATTTGAACTCAGCCATGTTGGTAGTCACATTGAATGTGAGCTGCCTAAGGGCTCTAAGGACATAGACTGTCAGTTTGGATTATTGGAGGTAGCCTCTAG	0	0	0	0	0	0	0	0	0	0	0	0	0	0	0	0	0	0	0	0	0	0	0	0	0	0	0	0	0	0	0	0	0	0	0	0	0	0	0	0	0	0	0	0	0	0
190	NODE_1717366_length_144_cov_2.06742_g1699952_i0	144	CGTGGCTGCATCAAGTTGTCGCAGCGCGTTACCGTAGCGCTTAGTTACAACATTTTCGTGCAAAAGCCGTTACTTGGTAAGCTGCGCGCGCATACAGGTGTTGTTGTGCGTGCTCACATCCTTAAGATAAGAGGTACTTTATGA	0	0	0	0	0	0	0	0	0	0	0	0	0	0	0	0	0	0	0	0	0	0	0	0	0	0	0	0	0	0	0	0	0	0	0	0	0	0	0	0	0	0	0	0	0	0
191	NODE_1717367_length_144_cov_2.06742_g1699953_i0	144	CGGCTTGGATGCTGGCTACATTGGGCAAATCAAGTAACTTTGGAAAGCAACTGAATTTCCTTGGTGGAAATTGAGCGCAGAGAGGATGGTTCTGATAGTTTTTTGGATCTTGGTCTGCATAATTTTGTTCATCTTTCCCAATCC	0	0	0	0	0	0	0	0	0	0	0	0	0	0	0	0	0	0	0	0	0	0	0	0	0	0	0	0	0	0	0	0	0	0	0	0	0	0	0	0	0	0	0	0	0	0
192	NODE_1717397_length_144_cov_2.06742_g1699983_i0	144	CGCAGAATTGGCCTTTTGTTTGTTGGTGCTATGGGCTGCTATGGCCGAAAGAGGACGAGTTAGGGTTGTTTGGATTAAGAAGATCTCAAGGGGCAGCCTTAGCTAATCTTATCTGTGGTTTATTGTTAAATACTTTATCTGTTC	0	0	0	0	0	0	0	0	0	0	0	0	0	0	0	0	0	0	0	0	0	0	0	0	0	0	0	0	0	0	0	0	1.42351	0	0	0	0	0	0	0	0	0	0	0	0	0
193	NODE_1717406_length_144_cov_2.06742_g1699992_i0	144	GTCAAGATATTGCACCTAGGCCGTACGTCCACCTCGAATTACCGCTTGGAATCAACTTTGTTTTTAACTTTATTTTGGACAATTTAACTTTACTTGTAAATAAAATTTACTTAGACATAGGAAAATTTATTTATTCATTTTGTA	0	0	0	0	0	0	0	0	0	0	0	0	0	0	0	0	0	0	0	0	0	0	0	0	0	0	0	0	0	0	0	0	0	0	0	0	0	1.50811	0	0	0	0	0	0	0	0
194	NODE_1717434_length_144_cov_2.06742_g1700020_i0	144	CATGTACAGATACTGATGATTTACAAATCACAGTAAATCAAGGAAGTGCTAGTACACAAAATATTTCAGGATTAAATTCACTTACTTTAAACGGCCAAACGTATACCACATCAGGAACCTACACGCAAGTCATTCCAAACCAAG	0	0	0	0	0	0	0	0	0	0	0	0	0	0	0	0	0	1.54543	0	0	0	0	0	0	0	0	0	0	0	0	0	0	0	0	0	0	0	0	0	0	0	0	0	0	0	0
195	NODE_1717489_length_144_cov_2.06742_g1700075_i0	144	CGTGAACACTGTAGACAGATCTGAACACGAACAGACGAGTTTTATTGGGGAAGGTTCCGGTGTAGATCTTCTTCACCATCTCCGGCTCCAACCGCTGGAGCGCCATGGCGAGGAGAGTCACCACCAGGAGAGCACAGATCCAGC	0	0	0	0	0	0	0	0	0	0	0	0	0	0	0	0	0	0	0	0	0	0	0	0	0	0	0	0	0	0	0	0	0	0	0	0	0	0	0	0	0	0	0	0	0	0
196	NODE_1717555_length_144_cov_2.06742_g1700141_i0	144	GGAACAATCTCCCCTCCTCTGTTTTTCACCTGGAAATGAAGAGTGGTAGATTCCTGGCAGCCGACACGTGAAAATCCACACAAACGAATATAGATTAAATTAAAGACGAACACTGAAGAATGAGGGGTAAAAAGCACTTACATT	0	0	0	0	0	0	0	0	0	0	0	0	0	0	0	0	0	0	0	0	0	0	0	0	0	0	0	0	0	0	0	0	0	0	0	0	0	0	0	0	0	1.24576	0	0	0	0
197	NODE_1717781_length_144_cov_2.04494_g1700367_i0	144	GGGAAATAGACGGCTTAAAAAGGAACGGCCCGTCGTCGTCGGGAGATTATTTGCCGGGCCCGCGCGTCATTGGGGAGGGGCGACGACCGGTGGAAATTTGCTGCAGCGCCGAGGTGGATTGGGAAGGGGAAAAGGGGTAGCTCC	0	0	0	0	0	0	0	0	0	0	0	0	0	0	0	0	0	0	0	0	0	0	0	0	0	0	0	0	0	0	0	0	0	0	0	0	0	0	0	0	0	0	0	0	0	0
198	NODE_1730614_length_143_cov_3.13636_g1713200_i0	143	GTGGTGGACGCCTGTGGTCCCTCCTGCTGCTCGGGGGGCTGGGGCGGGAGAGCCGCTTGGGCCTGGGTGGCGGAGGTGGCGGTGAGATGGGATTGTGCCGCTGCGCTCGGGCCTGGGGGACAGAGCCAGGAGGAGACTAGGGC	0	0	0	0	0	0	0	0	0	0	0.637954	0	0	0	0	0	0	0	0	0	0	0	0	0	0	0	0	0	0	0	0	0	0	0	0	0	0	0	0	0	0	0	0	0	0	0
199	NODE_1732581_length_143_cov_2.88636_g1715167_i0	143	TTTTTGTGAAAAATATTGACCAACAAGATGTTGCGGGAATCCCTGTCCATGATCGATAGCACCACTTCCAAATGGTGCGAGACGATTCGTCTGGGCGCCACTGATCCTAGTCATAGAGCCCAGAGTCCCTTTTTATAATTCAC	0	0	0	0	0	0	0	0	0	0	0	0	0	0	0	0	0	0	0	0	0	0	0	0	0	0	0	0	0	0	0	0	0	0	0	0	0	0	0	0	0	0	0	0	0	0
200	NODE_1738074_length_143_cov_2.09091_g1720660_i0	143	GAAGAAGCCGTCCTTGTCGGCAATCGTAGCCGCGAAGGTTTCTTTGTTGTAGAAGGCGTCACGAGTGTCAGCGGGGAACGTGGCGACGACTGGGGTTTGAATATTCGGGAAGATGACGGGGATGATGGACCAGCCGGGCGTGT	0	0	0	0	0	0	0	0	0	0	0	0	0	0	0	0	0	0	0	0	0	0	0	0	0	0	0	0	0	0	0	0	0	0	0	0	0	0	0	0	0	0	0	0	0	0
201	NODE_1739691_length_142_cov_16.3793_g1722277_i0	142	AGCGCCCCTCCTTCACGGGAGACGCCTAATTGGAACGATATGCTCCGGCTTGCCTGAGTATAGTTTAGTACGACCTCTGGTACAGGGATAGAGGATCACTCCTCTCTATAGCCTAGTGCGGTGACTAGGGCCTTACAAACAC	0	0	0	0	0	0	0	0	0	0	0	0	0	0	0	0	0	0	0	0	0	0	0	0	0	0	0	0	0	0	0	0	0	0	0	0	0	0	0	0	0	0	0	0	0	0
202	NODE_1746574_length_142_cov_4.22989_g1729160_i0	142	GGTTACCATACGAAGTTAGTCACCTACGTTAAACATAGGGGATATCCCCTATGTTTAACTAGGCTATGGCAGATCAGATGCATTTGTTTACCCTAATTAAAGCACATTTAGCCTTTTACCAATCCGTCTATGTGCTTTGTAT	0	0	0	0	0	0	0	0	0	0	0	0	0	0	0	0	0	0	0	0	0	0	0	0	0	0	0	0	0	0	0	0	0	0	0	0	0	0	0	0	0	2.49153	0	0	0	0
203	NODE_1748418_length_142_cov_3.78161_g1731004_i0	142	CGGGGCCAGTGGGTGATGCTAAGTTGTCAGGATGGGTGATGTCTGTCTGGAGAGCTGGCGGGGGGCAGCCGGGCCCCTTGGGCGCTCCTTGCAGAGCGGGAACTATGATTGATGTTTTCTTGCTCACTTGTGAATTGCGTGA	0	0	0	0	0	0	0	0	0	0	0	0	0.585804	0.739568	0	0	0	0	0	0	0	0	0	0	0	0	0	0	0	0	0	0	0	0.877881	0	0	0	0	0	0.539611	0	0	0	0	0	0
204	NODE_1751272_length_142_cov_3.17241_g1733858_i0	142	AAAACAAATTAAAGGAAAGAGAGCAATCTGCTACTATTTCTGAAATATCTTTACAGATTTTAAAAGAAACAATGTTAGAACATTCTTCATTAGTTTCTCAATTTAAAGAAGGAAACGAGAAAGCTCTTAACTTACTAGTGGG	0	0	0	0	0	0	0	0	0	0	0	0	0	0	0	0	0	0	0	0	0	0	0	0	0	0	0	0	0	0	0	0	0	0	0	0	0	0	0	0	0	0	0	0	0	0
205	NODE_1751300_length_142_cov_3.17241_g1733886_i0	142	TGTCTCATCCAAAAGAAATACCTTTGCTGTCAGATACTTCATAGGGTCGGCAAGGCAACTGGAAAAGCTTGGGTTGTTTTTGTTGGGTGAAGTGCACGATGAGGTCACGTTCCGGGAAACGTGGGAGAAACGACTATGCCCC	0	0	0	0	0	0	0	0	0	0	0	0	0	0	0	0	0	0	0	0	0	0	0	0	0	0	0	0	0	0	0	0	0	1.76404	0	0	0	0	0	0	0	0	0	0	0	0
206	NODE_1751425_length_142_cov_3.14943_g1734011_i0	142	GAGCGTCAGGAGGCTGCGGAGCGCCAGCTCGATGAGCACGCGTCCGCCCTCGCCCGTCTCGAGGGGGACTCCGCTGCGAGGCTCCAGGACGTGGAGCGCTGGGAGGAGGCCGTCGCCCAGCTGGAGCTCGACCTCGCGCGGG	0	0	0	0	0	0	0	0	0	0	0	0	0	0	0	0	0	0	0	0	0	0	0	0	0	0	0	0	0	0	0	0	0	0	0	0	0	0	0	0	0	0	0	0	0	0
207	NODE_1753478_length_142_cov_2.88506_g1736064_i0	142	ATCCACCTGAGCCTGCGTTGCGTTTGAATTAGCCGCAACACGCTTAGCCTGCGCCAAAGCATCATCTAACGCATCCGCCTGCTTAACAGCCGCATCCGCCTGCTCAACTTCTGGAGCTGAGCCGGCGTTTGCGTTACCAGCG	0	0	0	0	0	0	0	0	0	0	0	0	0	0	0	0	0	0	0	0	0	0	0	0	0	0	0	0	0	0	0	0	0	0	0	0	0	0	0	0	0	0	0	0	0	0
208	NODE_1758505_length_142_cov_2.11494_g1741091_i0	142	TCCCATAACACGGCTTTGGTCGTTCATGTGCGGACCGCACAACGTAGCAACCCCTAACTGGAAATTATCCACCTTGAGTCGATCGGCCCTGGTCCGTGTGATCGGCCGATCATAATATTGCAGCGTATGACACATACGCCGG	0	0	0	0	0	0	0	0	0	0	0	0	0	0	0	0	0	0	0	0	0	0	0	0	0	0	0	0	0	0	0	0	0	0	0	0	0	0	0	0	0	0	0	0	0	0
209	NODE_1758699_length_142_cov_2.11494_g1741285_i0	142	GAACTGCAAAGGTTGCCACTGGCTCACCTTCGTACTACACCGTTGGTGCAGCTGTTGCCTACAGCGTTGACACCCCAAGCTTGACCGTTGGCGACAACGTAAAGAAGAATTCGGCTGTCGACTACACCGTTCGCACCGGCAC	0	0	0	0	0	0	0	0	0	0	0	0	0	0	0	0	0	1.54543	0	0	0	0	0	0	0	0	0	0	0	0	0	0	0	0	0	0	0	0	0	0	0	0	0	0	0	0
210	NODE_1758990_length_142_cov_2.10345_g1741576_i0	142	GACAGAAATCCAGCATGGCCAACTCCATCCTGCTTCCAGCCTCACAGGCGGGCCGCCTTCACCCATCCCCGGGCACGGGCCAAGACAACCATGAGAGGAACTCGGTCTACGGTTCAACCCGGAGGCAAGGATAAAAGTCCCA	0	0	0	0	0	0	0	0	0	0	0	0	0	0	0	0	0	0	0	0	0	0	0	0	0	0	0	0	0	0	0	0	0	0	0.71377	0	0	0	0	0	0	0	0	0	0	0
211	NODE_1765973_length_141_cov_4.81395_g1748559_i0	141	GTCGTCCACGCACGAAGTGGTAGATAGTGCCAATATGGCTGCCACTGCAAAAGCAGCGTATGCTTTGAATAGATGTTTCATACTTACAAATTCTATATAGGATAATAAATAATGATTAGTCATTGCCGCCACCAGTTTCAT	0	0	0	0.521935	0	0	0	0	0	0	0	0	0	0	0	0	0	0	0	0	0	0	0	0	0	0	0	0	0	0	0	0	0	0	0	0	0	0	0	0	0	0	0	0	0	0
212	NODE_1772342_length_141_cov_3.2093_g1754928_i0	141	CTGGAAACCAGTGGTGCCTGGTCTGATATTACCTTTACGTACGTTAGAGGGCAAGCTTGTATCTTATAGAGCAGGTGAAACTTCAGAGCGTGCGTGAGGAGTCTGTCGGATTGGGTGAGTCAGGATCAAGTTGTTTCGGAG	0.628078	0	0	0	0	0	0	0	0	0	0	0	0	0	0	0	0	0	0	0	0	0	0	0	0	0	0	0	0	0	0	0	0	0	0	0	0	0	0	0	0	0	0	0	0	0
213	NODE_1779609_length_141_cov_2.13953_g1762195_i0	141	GGCCGTTATCCTGCTCTGGTCTTCAGCATTTGTGTTTGCGTCGTCTGATGTTCTAGGCTTTTGTTACTTCCATACCACCTTATTGGTTCTGAAGTGAACAGCTGTGGCAGGAGGGTTTGTTTTTATTCTCTTCGTGAGCTG	0	0	0	0	0	0	0	0	0	0	0	0	0	0	0	0	0	0	0	0	0	0	0	0	0	0	1.62569	0	0	0	0	0	0	0	0	0	0	0	0	0	0	0	0	0	0	0
214	NODE_1779680_length_141_cov_2.13953_g1762266_i0	141	GTTGATCGCCTATTTTTTATCTCATCGAGCTTATTCTAGTGGTATCTTTGGCGAAGGTTTGTCTAGAAAATGTTAGGCAGCAGTCCCTTTCTCATGCTGATTAATTATATTTATATTATTTATGAAGGATAGAAGCATGAC	0	0	0	0	0	0	0	0	0	0	0	0	0	0	0	0	0	0	0	0	0	0	0	0	0	0	0	0	0	0	0	0	0	0	0	0	0	0	0	0	0	0	0	0	0	0
215	NODE_1779698_length_141_cov_2.13953_g1762284_i0	141	GTTCGCGCAACGTGGTGGGCCTGTTGCCGTGTCAATGCCCCCCGTGGGCTCAGCAATCCCGCTGCTGGGATTGTAAAGCTGCCCTGGCTTTAGCGATAGCTTTAAAGCTTAGCTTTAAAGCTGGTTTTGGCTTTAAAGCCA	0	0	0	0	0	0	0	0	0	0	0	0	0	0	0	0	0	0	1.24353	0	0	0	0	0	0	0	0	0	0	0	0	0	0	0	0	0	0	0	0	0	0	0	0	0	0	0
216	NODE_1779749_length_141_cov_2.13953_g1762335_i0	141	CCCAAGTTCATGGACAGGCTGAAGGAGAAGTTACACGTCAAGCACGACTAAATTGTAGCTTACCAGAAAACATAATTCACTGTACTGTTGTATTGACTTGTGGATGTCTTGCTATAGTCTGTAATGCATACACGATTTCAA	0	0	0	0	0	0	0	0	0	0	0	0	0	0	0	0	0	0	0	0	0	0	0	0	0	0	0	0	0	0	0	0	0	0	0	0	0	0	0	0	0	0	0.842921	0	0	0
217	NODE_1779800_length_141_cov_2.13953_g1762386_i0	141	GGAGAGGATATAGTAAACTCTGAATCTTTAATAATCATGATAGCTAAATATTTAGCGGCAAAATTACATAAAAATTATTGCAAATACTTCTTCAAGTAAGTATTTTTAAATATAAACATTTAAAAGATAAATACTTTTAAT	0	0	0	0	0	0	0	0	0	0	0	0	0	0	0	0	0	0	0	0	0	0	0	0	0	0	0	0	1.32638	0	0	0	0	0	0	0	0	0	0	0	0	0	0	0	0	0
218	NODE_1779863_length_141_cov_2.13953_g1762449_i0	141	CGCAAGTAGACGCGCCCCAACCGCAACGCGACCGCGCAACCCGCCAGGAAATCCGCGCGGCCACACGCACAGCGCGAGGGGCTGCAAGCCGCATACCTGCGTCGCGGCGATTATTGACACCAAGCTGAACAGAATTCCCGG	0	0	0	0	0	0	0	0	0	0	0	0	0	0	0	0	0	0	0	0	0	0	0	0	0	0	0	0	0	0	0	0	0	0	0	0	0	0	0	0	0	0	0	0	0	0
219	NODE_1779899_length_141_cov_2.13953_g1762485_i0	141	TGGACCCCCGTGGACCCCTCCTAGCCATCTAGGAGTATACGGATCCTCCTTACGTCATCTGACCCACGTGCACCCCTCCCAGCCATCTAGGAGTATCAGTATCACTTTTAGGTCATCCTAAAGCACGTGCGACAATCCTAG	0	0	0	0	0	0	0	0	0	0	0	0	0	0	0	0	0	0	0	0	0	0	0	0	0	0	0	0	0	0	0	0	0	0	0	0	0	0	0	0	0	0	0	0	0	0
220	NODE_1779938_length_141_cov_2.13953_g1762524_i0	141	CCTGCTCTGGGCATCCCTGCTTGAGCAGGGGTTAGACTATATGACAACCAGGGGCCTTTTCTAATCAAACAGCCATTCTTGGATTCTGTGATAAGAGTTTGAAGTTGTAATTACTTACTTATGTACATATTGCTGGTGTGA	0	0	0	0	0	0	0	0	0	0	0	0	0	0	0	0	0	0	0	0	0	0	0	0	0	0	0	0	0	0	0	0	0	0	0	0	0	0	0	0	0	0	0	0	0	0
221	NODE_1791794_length_140_cov_3.68235_g1774380_i0	140	CGGGTGCAGGCACACGCGCTGCTCTCCATCTACACATCCAAGTAAACAACACAAATAGAACAGGAAACATTAATCAATCAACCAGCGCGGCAGCAAGCAGCGTACGCACGCTCCCTTGCAGCGCGTCTGGTAGGTAATCC	0	0	0	0	0	0	0	0	0	0	0	0	0	0	0	0	0	0	0	0	0	0	0	0	0	0	0	0	0	0	0	0	0	0	0	0	0	0	0	0	0	0	0	0	0	0
222	NODE_1793349_length_140_cov_3.32941_g1775935_i0	140	AGGCGGATATACGTGAAAAGCAGGAACAGAAAGAACAGGAAGTACAAGAAAAAGTATTAAAGCGGTATGCCGCATTGGCGGCCGGCGAGTCGGAGCAGGCGTCGTCGGCAGCTAAAGAAGAAACATTGCAGTTGGTTAAT	0	0	0	0	0	0	0	0	0	0	0	0	0	0	0	0	0	0	0	0	0	0	0	0	0	0	0	0	0	0	0	0	0	0	0	0	0	0	0	0	0	0	0	0	0	0
223	NODE_1793722_length_140_cov_3.24706_g1776308_i0	140	GTCCAGCAATTGACGAACACTTGACTTTTGTTTTTTAATAGCTACTTTCATATTATTTGCCTTTTATACCCTCCATTTGCAGGGAGGGCGATTTGTTACTCTTGCTCCATTAACTCGTAAACAAACTCGATAATTTCTCG	0	0	0	0	0	0	0	0	0	0	0	0	0	0	0	0	0	0	0	0	0	0	0	0	0	0	0	0	0	0	0	0	0	0	0	0	0	0	0	0	0	0	0	0	0	0
224	NODE_1793775_length_140_cov_3.23529_g1776361_i0	140	CGAGAACGAAGACGGTTTCAAATCTTTACCTACTAACGGCAACGGCACCGGAAATGAACAAATTAACGATCAGAGGTTCTCACACGTATCCGACAGCACTGCAGATGGAACCCATGGATTAGTCTACGGAGAGAAGGGAG	0	0	0	0	0	0	0	0	0	0	0	0	0	0	0	0	0	0	0	0	0	0	0	0	0	0	0	0	0	0	0	0	0	0	0	0	0	0	0	0	0	0	0	0	0	0
225	NODE_1801146_length_140_cov_2.16471_g1783732_i0	140	GATGGTTCCTTGCGCAGTAATCCCATCGGCTGCGCGGGCGATTTCATGAGTGCTGAGTCAACTACCTCCGAAGCCGAGAAGTCGTTCACTGGTTAGGGCATTGGTTGATCCGCTGAATGCATCGGGTTCGTAGGTCTGCG	0	0	0	0	0	0	0	0	0	0	0	0	0	0	0	0	0	0	0	0	0	1.53577	0	0	0	0	0	0	0	0	0	0	0	0	0	0	0	0	0	0	0	0	0	0	0	0
226	NODE_1801212_length_140_cov_2.16471_g1783798_i0	140	CGAGGATCAAAAAATACCTAAAATGATCATCGTAGATAATGAGAGGAAAGATCTAATTGCGCAGTTAATCACCAGCCACTATACTAATGACATGTTCAATGAGCTAGTTGCATGTGTGAGGAGTAGTGATATCGATAAAC	0	0	0	0	0	0	0	0	0	0	0	0	0	0	0	0	0	0	0	0	0	0	0	0	0	0	0	0	0	0	0	0	0	0	0	0	0	0	0	0	0	0	0	0	0	0
227	NODE_1801250_length_140_cov_2.16471_g1783836_i0	140	CCCAACCAATGGCAAAAATATCAAACGATCTCGACCAATTGCTTACACATCTCATCCTGAGTCCAACTTGCAACTTTTTGAACAAATGTCTGTAACACCCGCAAGCCGAAACTCACGGGCTATCTTTCATTCGCCCTTCT	0	0	0	0	0	0	0	0	0	0	0	0	0	0	0	0	0	0	0	0	0	0	0	0	0	0	0	0	0	0	0	0	0	0	0	0	0	0	0	0	0	0	0	0	0	0
228	NODE_1801259_length_140_cov_2.16471_g1783845_i0	140	GCCGAATCCCGATCTAACAAGCTGCGGCGCACGGCGGCTCGGCGACAACAGCAAGGCAAGGGCAGACGAGTAGCAGGGCAGGCAACGTTGTGCTTGTGCGGTTGCGAGCCAGCAGAGCAACGACCCGGCGGCCGCGCGCG	0	0	0	0	0	0	0	0	0	0	0	0	0	0	0	0	0	0	0	0	0	0	0	0	0	0	0	0	0	0	0	0	0	0	0	0	0	0	0	0	0	0	0	0	0	0
229	NODE_1801297_length_140_cov_2.16471_g1783883_i0	140	GGCATGGGGACAGGGAGGGTGTGCCTCCAGAAGCGAAGCCAGGAGGAAGAGGCCAGGGCTGGGCCAGAGTGCAGTTAGGGGGTCAGCTTGAGAAGGGAGTCTCTCCTCCTCTGAATGGGAGAAGTGAGAAATGAGCAGAG	0	0	0	0	0	0	0	0	0	0	0	0	0	0	0	0	0	0	0	0	0	0	0	0	0	0	0	0	0	0	0	0	0	0	0	0	0	0	0	0	0	0	0	0	0	0
230	NODE_1801408_length_140_cov_2.16471_g1783994_i0	140	GGCCGCACCATGCCTATTTCTTGATGCTAGGTTGCCAAAGAATGCACCTTATTCCTACATCGTCACGGGCATCAACACTATGGTTGGCGTGGTTTCTATCACGCGATGCAACTTTTCCATATATGGATCGGTAGCACGGC	0	0	0	0	0	0	0	0	0	0	0	0	0	0	0	0	0	0	0	0	0	0	0	0	0	0	0	0	0	0	0	0	0	0	0	0	0	0	0	0	0	0	0	0	0	0
231	NODE_1801516_length_140_cov_2.15294_g1784102_i0	140	TCATTCTATTTTTAAAATAAAATGTCACACGACAATGTAGAGAAACAATGAAAGCACTGAAGTCCGAATACTCGATATCTTCTTTTTGTATATAATCCACTTACATATGTAACACAGTGAAACAAGTGTAAAAGCAAAAT	0	0	0	0	0	0	0	0	0	0	0	0	0	0	0	0	0	0	0	0	0	0	0	0	0	0	0	0	0	0	0	0	0	0	0	0	0	0	0	0	0	0	0	0	0	0
232	NODE_1805339_length_139_cov_8.02381_g1787925_i0	139	CTCTTCCGATCTGCACATCAATCGGTGAGACGGTGGCCGATTGTGCGGCAGTGCATGATAAGCAACTTACCCAATGATGAAGTGTAAAATCATTGTCACCAGATTACCTCTGCGTATGACATATACGCTCGGCAGATCG	0	0	0	0	0	0	0	0	0	0	0	0	0	0	0	0	0	0	0	0	0	0	0	0	0	0	0	0	0	0	0	0	0	0	0	0	0	0	0	0	0	0	0	0	0	0
233	NODE_1810758_length_139_cov_4.38095_g1793344_i0	139	GGCCCGTCCACCCATTCGCATCATATCTATTAGATACATGCAATCATGCTTTACTTTTAATCCCACCTCTTTAATATACCCGAAGTGGTAGGGTATCAACTATTCACCTAGTATAGCGGTTGGGAGGATTCCACTCCCC	0	0	0	0	0	0	0	0	0	0	0	0.686033	0	0	0	0	0	0	0	0	0	0	0	0	0	0	0	0	0	0	0	0	0	0	0	0	0	0	0	0	0	0	0	0	0	0
234	NODE_1814308_length_139_cov_3.54762_g1796894_i0	139	ATAATATCCACCCCAGCGGGTTAACTCCTACAGAGGATAGGTCCTACGTTATGGTTTTTCATGACGACTTATTAGTCTCCCATTCACGCCAAGTTCAGGTTTCTCATGATCGGGTCGCCCCTCCCTGATCCTAAATCCA	0	0	0	0	0	0	0	0	0	0	0	0	0	0	0	0	0	0	0	0	0	0	0	0	0	0	0	0	0	0	0	0	0	0	0	0	0	0	0	0	0	0	0	0	0	0
235	NODE_1815406_length_139_cov_3.28571_g1797992_i0	139	TATGGAATTATAATGTGCTGAATATATGTTCAAGTTTGAAATATCATAATTTAGTAATTTTATTCTTATTTGTACTTCAGTTAATTCAGTGTATGCATTTAAATAGCAGTGTTGAGTAGATGTGCAGTATAATTCCATA	0	0	0	0	0	0	0	0	0	0	0	0	0	0	0	0	0	0	0	0	0	0	0	0	0	0	0	0	0	0	0	0	0	0	0	0	0	0	0	0	0	0	0	0	0	0
236	NODE_1815799_length_139_cov_3.21429_g1798385_i0	139	CGATCTTATTAATCTAATAATGTTGATCACGTGTATTAGAAACCTTGGACTTTTGGCGACAATGTTTTTCATTGTTTCCTTTACTAATACCAATATGCTTGCCTCAACTCTCTCCATCATTTCTTACGAAATAACTCAC	0	0	0	0	0	0	0	0	0	0	0	0	0	0	0	0	0	0	0	1.23627	0	0	0	0	0	0	0	0	0	0	0	0	0	0	0	0	0	0	0	0	0	0	0	0	0	0
237	NODE_1822806_length_139_cov_2.19048_g1805392_i0	139	ACGAGACTTGGGGATTCACACTTGGACGAGATGCCTGAAGACACCGGGGGTCTCAGTGATGGCTGAGGAAAGGGTCTCAGGAGCGGAGTCGGCAAAATTGCGAAATCGCTGCACAGCAGCGAATCTTGAAATATATTCT	0	0	0	0	0	0	0	0	0	0	0	0	0	0	0	0	0	0	0	0	0	0	0	0	0	0	0	0	0	0	0	0	0	0	0	0	0	0	0	0	0	0	0	0	0	0
238	NODE_1822809_length_139_cov_2.19048_g1805395_i0	139	CAGCTGACCAAAAAACGACTAGAAGCCGCATTGTTGATTGCTCGTAAAGCATATTATTCTAATTCATTGACGTATGCCAGTGATCAAAAAGTATCTAAGTTGCTAAGAAGTGGTAATGATATTAGGGAGTTAATTGAAC	0	0	0	0	0	0	0	0	0	0	0	0	0	0	0	0	0	0	0	0	0	0	0	0	0	0	0	0	0	0	1.32775	0	0	0	0	0	0	0	0	0	0	0	0	0	0	0
239	NODE_1822873_length_139_cov_2.19048_g1805459_i0	139	GGAAACGGGTCGTCCGGAGAGGGGGCAAGGTCCACAAGGAGCGCCGCTTGTTCGGCGTCTCGAGCTTCGGGCGCATCCCTTGAAAACCCTGGTGATCATTTGGCACCCTCGCGTTCACTGTCGTACTGGAATCCGCAAC	0	0	0	0	0	0	0	0	0	0	0	0	0	0	0	0	0	0	0	0	0	0	0	0	0	0	0	0	0	0	0	0	0	0	0	0	0	0	0	0	0	0	0	0	0	0
240	NODE_1822875_length_139_cov_2.19048_g1805461_i0	139	GTTATCGGTAAGCTAGGTACGTACACCTGCGTAGCTAGCTAGGGATCGACGCGACGTCCCTCTCCGGCCGGCCGCCGCGCGAGCTTCGAGCGAGAGGCCGGCGTCGTACGTCGGCAGGGGGGCGATCGAGGTGGGGAGG	0	0	0	0	0	0	0	0	0	0	0	0	0	0	0	0	0	0	0	0	0	0	0	0	0	0	0	0	0	0	0	0	0	0	0	0	0	0	0	0	0	0	0	0	0	0
241	NODE_1827100_length_138_cov_9.6988_g1809686_i0	138	CTTAAAACGAGTGCACACCCACTACCACACGACCTAGCTCGTGCATGTGCGGAACGCGCAACGTAGCAACCCCCAACTGGAAAATGATATGATTCCTCATTCGTGTGCAGAGTATGACACGTACTCCTGGTAGATCGG	0	0	0	0	0	0	0	0	0	0	0	0	0	0	0	0	0	0	0	0	0	0	0	0	0	0	0	0	0	0	0	0	0	0	0	0	0	0	0	0	0	0	0	0	0	0
242	NODE_1829779_length_138_cov_5.77108_g1812365_i0	138	CACCCCACAACCTCGCCTGATCGACACATGCTAAGATACAAACGCCAGGCGAATCTAGCACCACCACACGACGCGCATCATCATTTCGGCAAAGCTAGCTACACCTGGACACTCACACGCTACATTTTCCACCTCACG	0	0	0	0	0	0	0	0	0	0	0	0	0	0	0	0	0	0	0	0	0	0	0	0	0	0	0	0	0	0	0	0	0	0	0	0	0	0	0	0	0	0	0	0	0	0
243	NODE_1830299_length_138_cov_5.45783_g1812885_i0	138	TCTTCCGATCTGCATTGCACTTGTTATCAGCAGCTGAGGCAAGAGCAGTCACTACCTACCTAGGCCGGGTCTGACCCATCGGCCTGTAACCCTAGGTCTCTCTCGAAGTGTTGCGGGGGGCCGAAAGTAGGACGTGGC	0	0	0	0	0	0	0	0	0	0	0	0	0	0	0	0	0	0	0	0	0	0	0	0	0	0	0	0	0	0	0	0	0	0	0	0	0	0	0	0	0	0	0	0	0	0
244	NODE_1831302_length_138_cov_4.98795_g1813888_i0	138	GTGCACGATGCTCTTCACCTCCTCGTCCATCAGCGACTTCTCCGTCAGCTCCGCCGCCACCTTCTCCGCCGCGGCCTTGGCCTCCAGCGCCGCATTGCGCTCGCGCATCATCGTCTCCACCTGCTTCTTCAGCCAGGC	0	0	0	0	0	0	0	0	0	0	0	0	0	0	0	0	0	0	0	0	0	0	0	0	0	0	0	0	0	0	0	0	0	0.588014	0	0	0	0	0	0	0	0	0	0	0	0
245	NODE_1837552_length_138_cov_3.3253_g1820138_i0	138	GAATATAATGTTCTACTCATGTCCAATGGCAAAGTGAAAAACAAGATGCAAATAGCAACATTGGGCATGATTCGAACTAGTTAAGAACCATAATATAAAAAACACAAGATATTTGATAAGATCAAATAGCCTCCAAAG	0	0	0	0	0	0	0	0	0	0	0	0	0	0	0	0	0	0	0	0	0	0	0	0	0	0	0	0	0	0	0	0	0	0	0	0	0	0	0	0	0	0	0	0	0	0
246	NODE_1837633_length_138_cov_3.3012_g1820219_i0	138	CGCATCTTCTGCGCCTTTGGCCCCCGTATAGGTCAGGTGCCCGGGAAGGACCCAAGGGCACCCCTGCCCGCCCGGCTGGCTGCCGATGCCAACGCTGCGACGGGCGGGGCGGCAATCAGCAGCGCGGTTGAGGCCTGC	0	0	0	0	0	0	0	0	0	0	0	0	0	0	0	0	0	0	0	0	0	0	0	0	0	0	0	0	0	0	0	0	0	0	0	0	0	0	0	0	0	0	0	0	0	0
247	NODE_1840901_length_138_cov_2.89157_g1823487_i0	138	ACTGGCTTGAGGTTGGGAAAGACGACGAAATGGATGCCGGGATCGTGGAAAATGAAGAAGAATGGGTAGAGTCTAAAGAAACAACAGAAAGTGAAAGCACTGAGAGCGATGGGGATGAATATCTTGCAGATCGGAAGA	0	0	0	0	0	0	0	0	0	0	0	0	0	0	0	0	0	0	0	0	0	0	0	0	0	0	0.67148	0	0	0	0	0	0	0	0	0	0	0	0	0	0	0	0	0	0	0
248	NODE_1844967_length_138_cov_2.21687_g1827553_i0	138	GAGAAAGGCGCTATTGTTGTTTATAAGTCACACTTTGCTCTTAAGCCCGTGGTTATCTGATCTAGGCTGGAAGTTAATACATTATGTATCCTTACTATAGCTTCATTATTGTAGGGAATTGGGGTTGCATGAAGTCAG	0	0	0	0	0	0	0	0	0	0	0	0	0	0	0	0	0	0	0	0	0	0	0	0	0	0	0	0	0	0	0	0	0	0	0	0	0	0	0	0	0	0	0	0	0	0
249	NODE_1844974_length_138_cov_2.21687_g1827560_i0	138	AAATAATTGGAAGACATGCACTGGAGATTCCACATGTACCACTGAAACCCAGTAAGGTACAGAGCACGAGCCATGTTGAAAGGAACAGTGGGACCATTTGTAGCGTCTCTCCACGTAAACAAGGTAGGCTTATTCCGC	0	0	0	1.15894	0	0	0	0	0	0	0	0	0	0	0	0	0	0	0	0	0	0	0	0	0	0	0	0	0	0	0	0	0	0	0	0	0	0	0	0	0	0	0	0	0	0
250	NODE_1844975_length_138_cov_2.21687_g1827561_i0	138	GGAGAGGAGAAGGGAAGGGGCTCACCGGAGATAAGTCCCAGTTGTAGCCGGAGGAGGCGTCCGTCGGCCGCGTCCCCAGGTCGGCGTCCGTGTCGTCGCCTCCGTCCTCGAGAGGCAGGAGCTTGCTTTCTTCCTCCA	0	0	0	0	0	0	0	0	0	0	0	0	0	0	0	0	0	0	0	0	0	0	0	0	0	0	0	0	0	0	0	0	0	0	0	0	0	0	0	0	0	0	0	0	0	0
251	NODE_1845113_length_138_cov_2.21687_g1827699_i0	138	GACGGCGAACGTGGTGCCCGACGCCACCGAGAGCGACGCCGCGATGCTGACGGCGGTCACGGTGGACTGCTCGGAGGCGTTGATGGTCACGTCGCCGGTTGCGGTGACCGAGGTGTCGGTGACGGCTGCGGTGACGGT	0	0	0	0	0	0	0	0	0	0	0	0	0	0	0	0	0	0	0	0	0	0	0	0	0	0	0	0	0	0	0	0	0	0	0	0	0	0	0	0	0	0	0	0	0	0
252	NODE_1845221_length_138_cov_2.21687_g1827807_i0	138	GGCGCTTGCCTTGTAACTTAAAGTATCGACGAACACCTGTTTTCACGTTGTAAAATACCACCATACCGTTGAAAAATCTAGAATCTGAGTCGCAACCCTTGTGCTGGTTGACAATTCTAGGAGGATTCGTGCTTCTTG	0	0	0	0	0	0	0	0	0	0	0	0	0	0	0	1.55932	0	0	0	0	0	0	0	0	0	0	0	0	0	0	0	0	0	0	0	0	0	0	0	0	0	0	0	0	0	0
253	NODE_1851885_length_137_cov_6.13415_g1834471_i0	137	GCGGCCACACGGCAGGGACGCCGAGGGCAGAGGTGGGCGACGCGGCCACACGGCAGGGACGCCGAGGGCAGAGGTGGGTGAGGCGGCCACACGGCAGGGACGCCGAGGGCAGAGGTGGGCGACGCGGCCACACGGCA	0	0	0	0	0	0	0	0	0	0	0	0	0	0	0	0	0	0	0	0	0	0	0	0	0	0	0	0	0	0	0	0	0	0	0	0	0	0	0	0	0	0	0	0	0	0
254	NODE_1859759_length_137_cov_3.43902_g1842345_i0	137	GCAGCTGAACCAGAGGATGGTCTGCGGCCAGGAATGGATGAGCCTGAGCTGGACATTGTCCGTGACGAGATGGAACGGCCAGCGTGCGACAACGAGGGACGGCTCATGTCCGGAGCAGCAGATGGAACTGCGGCCGC	0	0	0	0	0	0	0	0	0	0	0	0	0	0	0	0	0	0	0	0	0	0	0	0	0	0	0	0	0	0	0	0	0	0	0	0	0	0	0	0	0	0	0	0	0	0
255	NODE_1860024_length_137_cov_3.36585_g1842610_i0	137	TGGGCAGGCACCTGATCGTAAGATTGCCGGCAGTAAGGCTTTTATTGGGAAATGGGCAACATCTCTCGGTAGTAAAACTTACTTGCTCATCGCAAGCTTCCTCAAGGATAGGCTGTTCAGCTAATTATTAGAGTCCG	0	0	0	0	0	0	0	0	0	0	0	0	0	0	0	0	0	0	0	0	0	0	0	0	0	0	0	0	0	0	0	0	0	0	0	0	0	0	0	0	0	0	0	0	0	0
256	NODE_1860939_length_137_cov_3.21951_g1843525_i0	137	AGCCACCGCGCCCGGCTGTATTTTAGTTTTCTAAAATTAAATTTAATCTAAGCCCCAAACAAGACACCACCTCGGAAAATCATCCCGTCTGAAAAGGTTGAGGTTTTCAACAATTCAAAACATCAATACACACCTGC	0	0	0	0	0	0	0	0	0	0	0	0	0	0	0	0	0	0	0	0	0	0	0	0	0	0	0	0	0	0	0	0	0	0	0	0	0	0	0	0	0	0	0	0	0	0
257	NODE_1862431_length_137_cov_3.06098_g1845017_i0	137	CCTCGACGGCCGGGTGGTCCTCCCCCGCCGCGCCCTCCTCCTCGCCGAGCACGTGCCCGACGAGCTCGCCGCTGGCGATGCCGATGGCGCGCAGCACCGTCCCGGACCCGACGCCCTCGTGGCCGGTGTCGCGGAAC	0	0	0	0	0	0	0	0	0	0	0	0	0	0	0	0	0	0	0	0	0	0	0	0	0	0	0	0	0	0	0	0	0	0	0	0	0	0	0	0	0	0	0	0	0	0
258	NODE_1862995_length_137_cov_3_g1845581_i0	137	CGGTGCAACAAGCGCGTTGTGTACGGTGATTTCTTCGTATGTGAACGCATCGTTGCCTTCGTCGTCCTCGCCTGCATGCTTGCGTATGGTGAAAACGATATCTTCTTTTAAGTTACAAAGTAGACTTCTCATCTCCA	0	0	0	0	0	0	0	0	0	0	0	0	0	0	0	0	0	0	0	0	0	0	0	0	0	0	0	0	0	0	0	0.648155	0	0	0	0	0	0	0	0	0	0	0	0	0	0
259	NODE_1866003_length_137_cov_2.58537_g1848589_i0	137	GCGTAAGGGGAAATAAAGATAAATAAAAAAGAAGCTTGCCTTCTCTTTGGATGCACTTAAGGCGTGCACTGCCTGTACAAGCTTCTTATCCCTATTGTAGAATGGAGAAAAACCTATGTCAAAATTGACTGATTTTT	0	0	0	0	0	0	0	0	0	0	0	0	0	0	0	0	0	0	0	0	0	0	0	0	0	0	0	0	0	0	0	0	0	0	0	0	0	0	0	0	0	0	0	0	0	0
260	NODE_1866459_length_137_cov_2.5122_g1849045_i0	137	ATCCAAACTCTTCACAAAACTAAAGTAAGCTAAAATCTAACTTTTACTACCACAAGCAACAACATTTGAGAATGCGTAAAAAGTTGAAGCTCCTGTGAGGTAAGTAATTCCCACACCTCACAAACCCAAGAACATTG	0	0	0	0	0	0	0	0	0	0	0	0	0	0	0	0	0	0	0	0	0	0	0	0	0	0	0	0	0	0	0	0	0	0	0	0	0	0	0	0	0	0	0	0	0	0
261	NODE_1867634_length_137_cov_2.2561_g1850220_i0	137	TGTAAAGCCAGATTAAGACCGTTGGGGGCCCTAAAGCCCCACATAATTTAAGGTGAAATGGTTACTCAATCTTAGGTTTGAGAGACTCTTCTGGGTTGGTTTTCTCCAATGATGGCTGTTTCGAGGCTTTGTTTGAG	0	0	0	0	0	0	0	0	0	0	0	0	0	0	0	0	0	0	0	0	0	0	0	0	0	0	0	0	0	0	0	0	0	0	0	0	0	0	0	0	0	0	0	0	0	0
262	NODE_1867706_length_137_cov_2.2439_g1850292_i0	137	CTGGGCAATTGACAAATAAATAGAGAGCATATCATAATGCATATACAAGCCAGTAAGAAAACATGTGAGATTTGATATGGGCATTACATCAAAATACATAGACCGTTATCCAACTGCATCTATGACTAATAATCCAC	0	0	0	0	0	0	0	0	0	0	0	0	0	0	0	0	0	0	0	0	0	0	0	0	0	0	0	0	0	0	0	0	0	0	0	0	0	0	0	0	0	0	0	0	0	0
263	NODE_1867836_length_137_cov_2.2439_g1850422_i0	137	GTGAGCGATTAGTTGAATATTGAAAATATTTAAACTAAAATGGCAAATAGTTGGTGGCAATGGATTGGGAACTATAAGGAATAGATTAACCAGTGATTAAAAAGCACGCGTAAAAGACAGAGCGATGAGGGAGGAGG	0	0	0	0	1.25064	0	0	0	0	0	0	0	0	0	0	0	0	0	0	0	0	0	0	0	0	0	0	0	0	0	0	0	0	0	0	0	0	0	0	0	0	0	0	0	0	0
264	NODE_1867917_length_137_cov_2.2439_g1850503_i0	137	CTTGAGAATAGTTCCTGTTACAGAATTTTTTCTTTCGGCCTCTCTGCCAATTTACTCGTCACTCAGGCGTTAACCTTCATAATTTTCGTTCAGCAGAGTTCGGAACTAACTTGATTTCCTGTTACAGAAACCTGTTC	0	0	0	0	0	0	0	0	0	0	0	0	0	0	0	0	0	1.52851	0	0	0	0	0	0	0	0	0	0	0	0	0	0	0	0	0	0	0	0	0	0	0	0	0	0	0	0
265	NODE_1868559_length_137_cov_2.19512_g1851145_i0	137	CATGTAATCTAAATCTCTAGCCTATTTCTCACTTCCAGACAATTATAATGCGTCATTCTGCATAGACCGGGAAAACTCCGACCACGGAAGCCCCACATCCCCGTGGAGATCGGAGCAGCAGCAGTCCGGCCTCAGTC	0	0	0	0	0	0	0	0	0	0	0	0	0	0	0	0	0	0	0	0	0	0	0	0	0	0	0	0	0	0	0	0	0	0	0	0	0	0	0	0	0	0.622882	0	0	0	0
266	NODE_1872975_length_136_cov_10.1111_g1855561_i0	136	CAATGATTTCGGGCCTTCACTTTGCCTGGTCATGTCGTGAGGTCTCTCCCATTGCACGGCGACGCACGGTCCTCAGGAGAGAAATCACGATTGTGCTCTCTTCGGGGGGTTCATGTCCTGAATACTTGGTCATCGG	0	0	0	0	0	0	0	0	0	0	0	0	0	0	0	0	0	0	0	0	0	1.4172	0	0	0	0	0	0	0	0	0	0	0	0	0	0	0	0	0	0	0	0	0	0	0	0
267	NODE_1872981_length_136_cov_10.0617_g1855567_i0	136	CGATGGTTTCGGGCCTTCACTTTGCCTGGCCATGTCGTGAGGTCCCTCCCATTGCACGGCGACGCACGGTCCTCAGGAGGGAACTTGCGATTGTGCTCTCTTCGGGGGGTTCACGTCCTTAATACTTGGAGATCGG	0	0	0	0	0	0	0	0	0	0	0	0	0	0	0	0	0	0.613626	0	0	0	0	0	0	0	0	0	0	0	0	0	0	0	0	0	0	0	0	0	0	0	0	0	0	0	0
268	NODE_1873059_length_136_cov_9.75309_g1855645_i0	136	TGCGAATGCCACGGTGGCCGATGCGGCGATGAGGACGGCGCAAGCTATCTTCTTCATCTCCATGATCTTCTTCTTTTTCTTTGGAAAAAGGCGAAACACGGAGATGAGAGGAAGAAGAAGGGATTGTTGCTTATTT	0	0	0	0	0	0	0	0	0	0	0	0	0	0	0	0	0	0	0	0	0	0	0	0	0	0	0	0	0	0	0	0	0	0	0	0	0	0	0	0	0	0	0	0	0	0
269	NODE_1874385_length_136_cov_6.98765_g1856971_i0	136	GCCTCACAGTGATCCAGCACTCCGGGCCAAACCAGGACGTGCCGTGGCCGTGGGCGGCCATCGCCTCCGTGTTCGCCTTCGTGGCCTCCTTCTCCATCGGCCTGGGGCCCATCACAGCGCGATCACCATGGGCGGC	0	0	0	0	0	0	0	0	0	0	0	0	0	0	0	0	0	0	0	0	0	0	0	0	0	0	0	0	0	0	0	0	0	0	0	0	0	0	0	0	0	0	0	0	0	0
270	NODE_1883334_length_136_cov_3.40741_g1865920_i0	136	GGCGTTTCTTGAGTTTCTTTGTTTCCTGTTTAATAGATATTAATTCTAAGGGATCATCCACATCTTCAACTGTATTAACCACTGAGGTCAACTCCGAGTGAATCTCACGGAACACTTGTAATTTCTTCCAGTCAAG	0	0	0	0	0	0	0	0	0	0	0	0	0	0	0	0	0	1.53975	0	0	0	0	0	0	0	0	0	0	0	0	0	0	0	0	0	0	0	0	0	0	0	0	0	0	0	0
271	NODE_1883438_length_136_cov_3.38272_g1866024_i0	136	CCTCCATCGGGGGTATCGAACAAAAGGCTGTTGCTGAAGCAGATGCCGCTCCCAAGCTTGCCCATGCCATGATGTCTGACCCCTCGTCCAAGGCCTACATTGACGCAGCTAAAAAGGACATAAAGGAGGGCGAGGC	0	0	0	0	0	0	0	0	0	0	0	0	0	0	0	0	0	0	0	0	0	0	0	0	0	0	0	0	0	0	0	0	0	0	0	0	0	0	0	0	0	0	0	0	0	0
272	NODE_1890711_length_136_cov_2.33333_g1873297_i0	136	CTACTCTAGCACTTACAATACCCTTTCCTACTTTAAGTCGTCTACAAAAGATCTGTTTTAATAATAATTGAAATTATATTCAGTGAATAGATTTCCACCTTTTCCGGTTTGATCTTTTCACCAATCTGAACTTAAG	0	0	0	0	0	0	0	0	0	0	0	0	0	0	0	0	0	0	0	0	0	0	0	0	0	0	0	0	0	0	0	0	0	0	0	0	0	0	0	0	0	0	0	0	0	0
273	NODE_1891077_length_136_cov_2.2716_g1873663_i0	136	CCAACAGCCAGTTCAGGGAGCATCAGGTTTTGTCAGCTCCTTGCTTCCTTGAGGTAAATTAGAGGGAAAAATGTGCTAAATGCAGTATCTGTGGGGAAGTGTCCTGAGGGATGCACACAGAGAGGCTCGGGTACCT	0	0	0	0	0	0	0	0	0	0	0	0	0	0	0	0	0	0	0	0	0	0	0	0	0	0	0	0	0	0	0	0	0	0	0	0	0	0	0	0	0	0	0	0	0	0
274	NODE_1891135_length_136_cov_2.2716_g1873721_i0	136	GGATTGAGTGCCTGTCATCTTCGCCTTCGTTGGCGGCAAGCGGCTTCGCTCGGATTTGCCGCGCTTCGTCTGCGTTGACGGCACACAATCCATAGAACGTTATAGATCGAGAACGATTGAGGCTTCCAAGCCTTTG	0	0	0	0	0	0	0	0	0	0	0	0	0	0	0	0	0	0	0	0	0	0	0	0	0	0	0	0	0	0	0	0	0	0	0	0	0	0	0	0	0	0	0	1.46516	0	0
275	NODE_1891451_length_136_cov_2.25926_g1874037_i0	136	GCATGAGCGACCACTACTTAGATCTGATCATATCTGTGATGCCTTCTGGGTAGGTTGGAGATCTAGTGTGAATGTTCTTATCAATTTGAGCGGTTTTAGTGGTTACTTGTTATTGCGTCTCTGTGTCTCGTGGTCG	0	0	0	0	0	0	0	0	0	0	0	0	0	0	0	0	0	0	0	0	0	0	0	0	0	0	0	0	0	0	0	0	0	0	0	0	0	0	0	0	0	0	0	0	0	0
276	NODE_1891694_length_136_cov_2.23457_g1874280_i0	136	GTTTGGGATCTACATCAATATTTTTAAGTAAGCGGAACACTTTCACGAGCTACTTAACACTTTATTTTATTTTCTCGAAAAGTGGAACATTTTCTTTTGGCTAACTAAACACATAAACTCTACAAGCTAGGTGAAC	0	0	0	0	0	0	0	0	0	0	0	0	0	0	0	0	0	0	0	0	0	0	0	0	0	0	0	0	0	0	0	0	0	0	0	0	0	0	0	0	0	0	0	0	0	0
277	NODE_1896156_length_135_cov_54.1_g1878742_i0	135	TAAGCGCATGTGTCATACGCAGGGGTGGCATGATATGGTGACCGAATTAAACCTAATCCATGGTATTAAGTCGCTTATTGCGCAATGCCTCGCAATTTCAGTCACCAAACCACCGAGCTGGTGTGTCCTGAGATC	0	0	0	0	0	0	0	0	0	0	0	0	0	0	0	0	0	0	0	0	0	0	0	0	0	0	0	0	0	0	0	0	0	0	0	0	0	0	0	0	0	0	0	0	0	0
278	NODE_1896183_length_135_cov_22.7875_g1878769_i0	135	CATGAAGGCACACCAAACGCACGAGCGCCGCGAGGTGTCTCGTGTCGTGGTGGTACCACGTGCGGCATGCACGTGTAGCTTACAAAATCAAGAGTTTATGATTACAGCCACCGCGTAGCTAAACGAGCATATGAC	0	0	0	0	0	0	0	0	0	0	0	0	0	0	0	0	0	0	0	0	0	0	0	0	0	0	0	0	0	0	0	0	0	0	0	0	0	0	0	0	0	0	0	0	0	0
279	NODE_1898002_length_135_cov_7.1125_g1880588_i0	135	ATCTGGGAAGTCTTAGAAGAAAGTATCAAACAAACTATATAGCTAAATTTAAAAAATATTTTTCGTATAGTGAAAAAGATTATATGCAAGATGGACAATTTAAAGCAATATATGCAGAAGCAAGTAAATATTTAG	0	0	0	0	0	0	0	0	0	0	0	0	0	0	0	0	0	0	0	0	0	0	0	0	0	0	0	0	0	1.04016	0	0	0	0	0	0	0	0	0	0	0	0	0	0	0	0
280	NODE_1899576_length_135_cov_5.7375_g1882162_i0	135	GTGGGTTCTGTGGCTGAATTTGGTCGGCCTCCCAGCGGTTTCCCAAGATATGTTTTTGACCCATGTCCTCTTATTTTTGCCTGCTAGCTAGGGTGTGGGTACGTATTGGCGTACCTGCGGTTAGTGTTCGTTCAG	0	0	0	0	0	0	0	0	0	0	0	0	0	0	0	0	0	0	0	0	0	0	0	0	0	0	0	0	0	0	0	0	0	0	0	0	0	0	0	0	0	0	0	0	0	0
281	NODE_1899932_length_135_cov_5.5125_g1882518_i0	135	CTTAAAACGAGAGCACACCCTCCCCACCACACGACCTAGCCTCGTGCATGTGCGGAACGCGCAACGTAGCAACCCCACAACTGGAAAATGATATGATTCCTCATTCCTGTGCAGAGTATGACACGTACTCCTGGT	0	0	0	0	0	0	0	0	0	0	0	0	0	0	0	0	0	0	0	0	0	0	0	0	0	0	0	0	0	0	0	0	0	0	0	0	0	0	0	0	0	0	0	0	0	0
282	NODE_1900045_length_135_cov_5.4625_g1882631_i0	135	ATCCTAGCCCCGAATGAATGCTATAGTTCTGTTTTACACATGCGAGTTTAGCGAGGCATTATTATGTGTCGCAGCAAACGGGTGAGTAATTTTGACTACATAAGGTGTAAGAGTTCAGACTCCGTTGATTAAGAC	0	0	0	0	0	0	0	0	0	0	0	0	0	0	0	0	0	0	0	0	0	0	0	0	0	0	0	0	0	0	0	0	0	0	0	0	0	0	0	0	0	0	0	0	0	0
283	NODE_1914285_length_135_cov_2.3_g1896871_i0	135	TCTTAAAAAAGGAAAGTCCTCAAACAACCGTCCCTTAAACTAGATTCGTACTCCGTACTTATTCTACCTGATTTTCGTTCTTCTGACTAGTTTGCAGAGTTACTCTATTCGATACTATTTTAGCTGCCTTTTCGT	0	0	0	0	0	0	0	0	0	0	0	0	0	0	0	0	0	0	0	0	0	0	0	0	0	0	0	0	0	0	0	0	0	0	0	0	0	0	0	0	0	0	0	0	0	0
284	NODE_1914409_length_135_cov_2.3_g1896995_i0	135	GCCGGCTTAGAAAGGCCACGTATACCACCAACAATGGCAAGAGAGGCACCGCAGGCAAAACCAGCTAGGGCATGTGAAAAGCCCTGTTCCTCAACCTGTTCAACTTTCATCTCACGACGTGCGCGCTGTTCTGCA	0	0	0	0	1.25522	0	0	0	0	0	0	0	0	0	0	0	0	0	0	0	0	0	0	0	0	0	0	0	0	0	0	0	0	0	0	0	0	0	0	0	0	0	0	0	0	0
285	NODE_1914481_length_135_cov_2.3_g1897067_i0	135	CCAACACACAGGACCTAGACCGAGGCCTAGCCAGAACCCGAGATTTAATACGAGTAGACCCACCAAGTCTATCGTTAGCCGCCTAAACAAAGAGAGGGATTTAGGTATTGTTTTGAATTTTCCAACCAAAAACAC	0	0	0	0	0	0	0	0	0	0	0	0	0	0	0	0	0	0	0	0	0	0	0	0	0	0	0	0	0	0	0	0	0	0	0	0	0	0	0	0	0	0	0	0	0	0
286	NODE_1926954_length_134_cov_4.26582_g1909540_i0	134	GTAAAACGGGACCAGGCAAAGAGGATAGGATAAAGTTAACAATAATGGGAGTACTTGAGAACAGAGTGGGGTCAAAAAGTGGGTGGTTAATGGGGGTAGTGTAGTGGCTGGCTGACACCATGATTAAAAAAGCG	0	0	0	0	0	0	0	0	0	0	0	0	0	0	0	0	0	0	0	0	0	0	0	0	0	0	0	0	0	0	0	0	0	0	0	0	0	0	0	0	0	0	0	0	0	0
287	NODE_1927588_length_134_cov_4.12658_g1910174_i0	134	GAACATTTTGAGGACATCTGGCGGGATTGTCAGGAGAAATAACAGGGGAACTCATTTTTTAACTGCCCTGTGGGGTTGTCCCAGACCACCTGACTAGTAGATGGCATAGAGATTTAAATTAAGGTCTTTTTGAG	0	0	0	0	0	0	0	0	0	0	0	0	0	0	0	0	0	0	0	0	0	0	0	0	0	0	0	0	0	1.06867	0	0	0	0	0	0	0	0	0	0	0	0	0	0	0	0
288	NODE_1929079_length_134_cov_3.78481_g1911665_i0	134	GCCAATGGCAAGCGTACAGCTTGACTGCGTCCGTTCATGAAGATTTTGGCGGTTGTTGGGATTGAAGTTGGTGGGCTGGTTTTAGAAGAAATGTGTAAATTTGACATAAGCACTCCTTTTTAGACTGATTATAG	0	0	0	0	0	0	0	0	0	0	0	0	0	0	0	0	0	0	0	0	0	0	0	0	0	0	0	0	0	0	0	0	0	0	0	0	0	0	0	0	0	0	0	0	0	0
289	NODE_1929298_length_134_cov_3.73418_g1911884_i0	134	GGGGCCCATCATCACGCCTCACCCATCATGTCACCCGGATTTACCTAGACAACAGGCCACACGCTTAACCACGGAATAACCACCACCGCAGTCGGCTACAATCCTGTGTCACTCCCATGCTCCCCTACTGCTAA	0	0	0	0	0	0	0	0	0	0	0	0	0	0	0	0	0	0	0	0	0	0	0	0	0	0	0	0	0	0	0	0	0	0	0	0	0	0	0	0	0	0	0	0	0	0
290	NODE_1930158_length_134_cov_3.49367_g1912744_i0	134	AGACAAGGAAAGCGAATAAAACAGTAGACATCATCAAAAAGAAATTTAAAACGAAGAGTCCCAAAAAGAAGATCGATAGCGAAGCATAGTAAATAAAGCGAAAGATAAAAAACGAGGATCGCGAGAAGTATGAA	0	0	0	0	0	0	0	0	0	0	0	0	0	0	0	0	0	0	0	0	0	0	0	0	0	0	0	0	0	0	0	0	0	0	0	0	0	0	0	0	0	0	0	0	0	0
291	NODE_1931549_length_134_cov_3.27848_g1914135_i0	134	CCGGAGAAGCTCAAGCCCCGAGAGTAGAGTATCGAGGTTGGCATGGCTCAAGCCACTGCCTTGCTCCATCTTTCTCTCTCTCGTTTGCTGTGTTGATCTTGCCTACTCAAGATCTATCTAACCCTATCTTTTCT	0	0	0	0	0	0	0	0	0	0	0	0	0	0	0	0	0	0	0	0	0	0	0	0	0	0	0	0	0	0	0	0	0	0	0	0	0	0	0	0	0	0	0	0	0	0
292	NODE_1937493_length_134_cov_2.48101_g1920079_i0	134	GCGCCCGCGAGACACGCCTGACCCCTCTTCTCCGCCCCAACAAGCGCCGCATCTCCGCGCCTACGCGCCAGCGCCGACCCGAGGAGGCGGGCAGAGGAGGGAGAGCCACCGGTCGAGGGCGCGCTGCGGCGGGG	0	0	0	0	0	0	0	0	0	0	0	0	0	0	0	0	0	0	0	0	0	0	0	0	0	0	0	0	0	0	0	0	0	0	0	0	0	0	0	0	0	0	0	0	0	0
293	NODE_1938018_length_134_cov_2.32911_g1920604_i0	134	CAGAAGATTTGTGTCAATAATAATTCGAAATTGTGATTCGAGTCGGAGTATTAACCTGTTCCGGTTTTTTATCCGACCCTCATTCTGAACTTAAGGACAAGCCCTATTCTTTTTCGTTTATTATTGATTGGGAC	0	0	0	0	0	0	0	0	0	1.51343	0	0	0	0	0	0	0	0	0	0	0	0	0	0	0	0	0	0	0	0	0	0	0	0	0	0	0	0	0	0	0	0	0	0	0	0
294	NODE_1938144_length_134_cov_2.32911_g1920730_i0	134	GTCACGGACTGGAGGTCCACGCTTCTCGTGGAGAATTTCTTGTTCCACATGTGTCTGAGGGTGTCGTGCACGAGGGTCTTGATTTGGCGGTCCTGTTGGAGGGAGGGCACTTGGTTTTGCGATTTCTGGCGCTT	0	0	0	1.15894	0	0	0	0	0	0	0	0	0	0	0	0	0	0	0	0	0	0	0	0	0	0	0	0	0	0	0	0	0	0	0	0	0	0	0	0	0	0	0	0	0	0
295	NODE_1938248_length_134_cov_2.32911_g1920834_i0	134	GTTGATTGACCTTCATGTTTCATCTTAAGCATCACTGCCTCTTAGAAGTTCCTGACCATGTCCTCCTTTGCTTTTCTAGCATAATACTTATTGTCCTGAACTGAAATTTGCCTCGACTGGAGTGCCTTCAGGGC	0	0	0	0	0	0	0	0	0	0	0	0	0	0	0	0	0	0	0	0	0	0	0	0	0	0	0	0	0	0	0	0	0	0	0	0	0	0	0	0	0	0	0	0	0	0
296	NODE_1938317_length_134_cov_2.32911_g1920903_i0	134	CGGTCGCCCAGCGCGGAGGCGGCGGCGGCATCCGCGGCACCGAACTCATTTCATTCATCGGTTGGACCCAATCACTTTTATAAAAATCGGCAGTGCGTCGCACCTGTCGGTATATTTCCAAATATATCAACACA	0	0	0	0	0	0	0	0	0	0	0	0	0	0	0	0	0	0	0	0	0	0	0	0	0	0	0	0	0	0.695153	0	0	0	0	0	0	0	0	0	0	0	0	0	0	0	0
297	NODE_1938328_length_134_cov_2.32911_g1920914_i0	134	GTGGCCAAGAAACAGGAGTCGTCAAGCGAAGAGGACAGCTCTGAGGACGAGGCGCCGAAAAAGGCAGCTCCAGTGAAGGCCACTCCGGCCAAGGCAGCTCCAGCTAAGTCAGCTCCGGCAAAGGCTACACCAGC	0	0	0	0	0	0	0	0	0	0	0	0	0	0	0	0	0	0	0	0	0	0	0	0	0	0	0	0	0	0	0	0	0	0	0	0	0	0	0	0	0	0	0	0	0	0
298	NODE_1938375_length_134_cov_2.32911_g1920961_i0	134	GCGGGTATCGAACTTGGGCATTTCACCCTTGCGGATTGCTTCAAGCTTCGGCATCTCAACCATCGGGACGTTGATGACGCGCACGTTCTTCGCTGCAACAGGCTTGCGGACGGGCTTCGTCGCGCGAGTTGGGC	0	0	0	0	0	0	0	0	0	0	0	0	0	0	0	0	0	0	0	0	0	0	0	0	0	0	0	0	0	0	0	0	0	0	0	0	0	0	0	0	0	0	0	0	0	0
299	NODE_1962013_length_133_cov_2.35897_g1944599_i0	133	CACGGGCCCCGTCGCTCACGCGCGTCTGAAGGAGAACCGTAGTGCAGGCACACATCGATATCGACATCGAGGCGCTCCGTGCGCACAGGGCCCCGCGCACGGCGCGGATCCTCTCGATGGCGGAGCGCCACAA	0	0	0	0	0	0	0	0	0	0	0	0	0	0	0	0	0	0	0	0	0	0	0	0	0	0	0	0	0	0	0	0	0	0	0	0	0	0	0	0	0	0	0	1.45966	0	0
300	NODE_1962015_length_133_cov_2.35897_g1944601_i0	133	GCGTCGTTATTGGTCGGTGAATTGGCCTTTTGCGCAGAGGTCTGCGCATGGGCCGCGCCGGCCGTAAGGGCGAGGGCGGCTGCCAGGGCAATTATTCTCATAGGAGCATCTCCTGGAACCGGGCGCGAAATCG	0	0	0	0	0	0	0	0	0	0	0	0	0	0	0	0	0	0	0	0	0	0	0	0	0	0	0	0	0	0	0	0	0	0	0	0	0	0	0	0	0	0	0	1.46516	0	0
301	NODE_1962086_length_133_cov_2.35897_g1944672_i0	133	GGCTCGAGGGCATGCTGGTGGGGTAGGTCATGATGATCTGCGTCTTGGGAATGTTGGCGGCAATGACCGCCAAGCGAGCCGCAGTAGCGTTGTATCCAGTGGTGTTGACAACGATGTGCTCATACAACACGTC	0	0	0	0	0	0	0	0	0	0	0	0	0	0	0	0	0	0	0	0	0	0	0	0	0	0	0	0	0	0	0	0	0	0.588014	0	0	0	0	0	0	0	0	0	0	0	0
302	NODE_1962450_length_133_cov_2.34615_g1945036_i0	133	TGTCAGCCGGGTAGCCCTAGGTTTGCATATTAAGGAAACGGCTCCTGGGGGAGGAGTCGGATATCAGAGTTTACATCTCAAGGTGCGGAGGGAGGGAGTCTGATGTGCTGGAGGGAGATTAAGAACGGATGCC	0	0	0	0	0	0	0	0	0	0	0	0	0	0	0	0	0	0	0	0	0	0	0	0	0	0	0	0	0	0	0	0	0	0	0	0	0	0	0	0	0	0	0	0	0	0
303	NODE_1963527_length_133_cov_2.25641_g1946113_i0	133	GAATCTTTTAAAATATCTCAAATAGATTCAAATTCCCCAGAATATATATGATTTATTTCCAACAATACTTTGAAAATTCAGGTTATTTCTCCATGAGAGTTCTCTGGCCATCATCTATATAGTTTCATATCCC	0	0	0	0	0	0	0	0	0	0	0	0	0	0	0	0	0	0	0	0	0	0	0	0	0	0	0	0	0	0	0	0	0	0	0	0.644758	0	0	0	0	0	0	0	0	0	0
304	NODE_1971336_length_132_cov_5.92208_g1953922_i0	132	TATGCCTACAGCACTAACGAAACTCAAAGCTACATCAAACGATATTTTAAACAATAATATTAATAATATAAATTAAAAAAGAATTATGAAAGAAGTAATTGACACTCAAGAAACAACGAGAAAGAAAAAACA	0	0	0	0	0	0	0.597366	0	0	0	0	0	0	0	0	0	0	0	0	0	0	0	0	0	0	0	0	0	0	0	0	0	0	0	0	0	0	0	0	0	0	0	0	0	0	0
305	NODE_1973591_length_132_cov_4.77922_g1956177_i0	132	AAGGCAGTAACATTTGTTGCTACGAAGATAATAAAAAATCCCCTAAATACATCGTGTATTAGGGGATTTTATTGTTATTTCATTATAATTTTTGTTCAACTTCTATTTCTGTGAATGTTTCAATAATATCTC	0	0	0	0	0	0	0	0	0	0	0	0	0	0	0	0	0	0	0	0	0	0	0	0	0	0	0	0	0	0	0	0	0	0	0	0	0	0	0	0	0	0	0	0	0	0
306	NODE_1977719_length_132_cov_3.7013_g1960305_i0	132	GTTCATACTATTCCCTTATAATAATTCTTATTTCTGTAAAATTAGTGACGACACTCCCTCCTCAATTCTCGACCCCAATAATTTGAGTCCTCTCTCTCCCCTCCCAGTCAGTCTACACAGCCCTAGGGCAAC	0	0	0	0	0	0	0	0	0	0	0	0	0	0	0	0	0	0	0	0	0	0	0	0	0	0	0	0	0	2.02226	0	0	0	0	0	0	0	0	0	0	0	0	0	0	0	0
307	NODE_1978069_length_132_cov_3.58442_g1960655_i0	132	GTTTTATTGGTGGGTATTAATTATTATCTAATAGATAGTAAGTATATCTATCGGAGTTTAATAGATAGCTTGGTATAAACCAAGCTATACGTAACTATATTATTAAATTATGATCCTCTAAGGACTATTGTT	0	0	0	0	0	0	0	0	0	0	0	0	0	0	0	0	0	0	0	0	0	0	0	0	0	0	0	0	0	0	0	0	0	0	0	0	0	0	0	0	0	0	0	0	0	0
308	NODE_1979746_length_132_cov_3.33766_g1962332_i0	132	CGACGACGGCTTCGGCTACGGCGACTTCCCGGACTTCGATCTGAGCGCAGGGTACCCGGCCTTCTGACCGTGTCCCGCGCGCCGTCGGCACGGCGGCGCGCGGGAGCGTGGGCAGGAGGGGCGCATGACGCG	0	0	0	0	0	0	0	0	0	0	0	0	0	0	0	0	0	0	0	0	0	0	0	0	0	0	2.43853	0	0	0	0	0	0	0	0	0	0	0	0	0	0	0	0	0	0	0
309	NODE_1980839_length_132_cov_3.22078_g1963425_i0	132	GGCGGTGATATGGTTTTGCCTCAGGTAATTGATACATAGTATCTACCTTAGGCGTAGGAATATATCATCCAGAAAGTCGAGAGCCAAAGCACCCTCACCGAGCGCCTGCCGAAGCATTTACTCAAGGATCCA	0	0	0	0	0	0	0	0	0	0	0	0	0	0	0	0	0	0	0	0	0	0	0	0	0	0	0	0	0	0	0	0	0	0	0	0	0	0	0	0	0	0	0	0	0	0
310	NODE_1985002_length_132_cov_2.63636_g1967588_i0	132	CCGCCGAACACGGTACGGGCCACCACGATGGCGGTCACGATGGTGGACAGGCCGGGCTTGGTGAGCACGATGTCGGCGGCGGCACGGGCAGCGTCAGTGGCGCCCTGGACGGCCACACCGACGTCGGCGCGC	0	0	0	0	0	0	0	0	0	0	0	0	0	0	0	0	0	0	0	0	0	0	0	0	0	0	0	0	0	0	0	0	0	0	0	0	0	0	0	0	0	0	0	0	0	0
311	NODE_1985997_length_132_cov_2.38961_g1968583_i0	132	TGTAAATTGAAAATATCTAACACTGTTGTCTACAAAATTCAAATTGGCATTCTTTAACATACTAGAGACTGAGATAAATATCTTTGTAGGTGGTGGTTTGGCCAAATATCAACAAGAATTAGAGAAATTGAT	0	0	0	0	0	0	0	0	0	0	0	0	0	0	0	0	0	0	0	0	0	0.767886	0	0	0	0	0	0	0	0	0	0	0	0	0	0	0	0	0	0	0	0	0	0	0	0
312	NODE_1986075_length_132_cov_2.38961_g1968661_i0	132	GCATATTTCTCATACTCTCTTTATGACCTAATCTTATCTTCTTAAGGAGATAGGGTAAGTTTGTACTATCGATAAGTATAGATGATACTTGTCATTAAACTAATATCATATCCTCAATCTTCGGAGTACAAC	0	0	0	0	0	0	0	0	0	0	0	0	0	0	0	0	0	0	0	0	0	0	0	0	0	0	0	0	0	0	0	0	0	0	0	0	0	0	0	0	0	1.24576	0	0	0	0
313	NODE_1986126_length_132_cov_2.38961_g1968712_i0	132	GCAGACTTTGATTCCATGACATCCCTTTCTTTACACGCGCAGCGGCTACCAGGTTTAGTGGCCGTACACCGGTAGACTAACCATTTATGCACAATTCCTCCTCGGCCCCCCAGGTGGGCGTGAAAACCGTCG	0	0	0	0	0	0	0	0	0	0	0	0	0	0	0	0	0	0	0	0	0	0	0	0	0	0	0	0	0	0	0	0	0	0	0	0	0	0	0	0	0	0	0	0	0	0
314	NODE_1986136_length_132_cov_2.38961_g1968722_i0	132	CTGTCCTGTTCACGGCACCCAAAACGGTGACCATTTTGATTGTTGGTTTCGCCACGTCACCATATTTGTGCTTGGTGACGACAATTTAACCGTGTTTTGCGACACTGATGATAATGTACGATTCATGATGAA	0	0	0	0	0	0	0	0	0	0	0	0	0	0	0	0	0	0	0	0	0	0	0	0	0	0	0	0	0	0	0	0	0	0	0	0	0	0	0	0	0	0	0	0	0	0
315	NODE_1986200_length_132_cov_2.38961_g1968786_i0	132	CTTGTATTAGAGGGAGTTGCAAGCCTAGCCGAACTTGCTCTCGGCGGCTCACTTGCACCACTGGCTCTGGTGCACACTGCAGGGGTGGGGGCAGTAAATCTAGACCGTTTGGTCCGCCTCGCTCGATCGCAA	0	0	0	0	0	0	0	0	0	0	0	0	0	0	0	0	0	0	0	0	0	0	0	0	0	0	0	0	0	0	0	0	0	0	0	0	0	0	0	0	0	1.24576	0	0	0	0
316	NODE_1986273_length_132_cov_2.38961_g1968859_i0	132	TACAAGTTCGCCATGGACGCCCTCGCAAAGCAGGACCACCTCACCCTCGCTCCCGCCCTTCCCTGGATCCCCGCCGGTGGCGCCGGCTCCTCCTCCGCCGACCGCTGAGTGAGTGAATGTAAGTGAGTGGGA	0	0	0	0	0	0	0	0	0	0	0	0	0	0	0	0	0	0	0	0	0	0	0	0	0	0	0	0	0	0	0	0	0	0	0	0	0	0	0	0	0	0	0	0	0	0
317	NODE_1986589_length_132_cov_2.36364_g1969175_i0	132	CCGCATGCAGTCGCAGAAGCACCCCGTTTCCTCCTCCGCCGCCGCCGAGCTGATCACCGCCGCGACGACCACCGCCAGCAACCACACAGGCCGCGGGTGCTCTCTTGCCGCCCATGGCAACGGAAGATCGAG	0	0	0	0	0	0	0	0	0	0	0	0	0	0	0	0	0	0	0	0	0	0	0	0	0	0	0	0	0	0	0	0	0	0	0	0	0	0	0	0	0	0	0	0	0	0
318	NODE_1988030_length_132_cov_2.25974_g1970616_i0	132	AGAATATCTACATTCAACATCTTTTATAAAATATCGTTCAAATAACCAAACTCTTATATATACTTAATGACAAGCAAAGGTAAACTTTATTTACACCAACTCTTTCATTATCTTAACACATATTCTTTCTAC	0	0	0	0	0	0	0	0	0	0	0	0	0	0	0	0	0	0	0	0	0	0	0	0	0	0	0	0	0	0	0	0	0	0	0	0	0	0	0	0	0	0	0	0	0	0
319	NODE_1988063_length_132_cov_2.25974_g1970649_i0	132	ATGACCTTAGCCCACTTGCCTTAGGGTGTGGGAGGCTCTCGGATGGAGGGGGAGGCTCTTGCCTTGTGGGAGTGGTCATTTTCTCAAGGTGCATTGTTTCTGCCTTATTGCAGGACGCTCGTGGGAGAGGAC	0	0	0	0	0	0	0	0	0	0	0	0	0	0	0	0	0	0	0	0	0	0	1.52988	0	0	0	0	0	0	0	0	0	0	0	0	0	0	0	0	0	0	0	0	0	0	0
320	NODE_1999194_length_131_cov_4.39474_g1981780_i0	131	CTTGACACAGACCCTAAGCATGCATACGACTCGCAAGGCCAACAGTAAACAAACAAGGGTGATATGACATAACAAAGGTGCTAGATGGGCTGCAAGGATAACATGCGATAGGATTCGGGACACAACTAAAG	0	0	0	0	0	0	0	0	0	0	0	0	0	0	0	0	0	0	0	0	0	0	0	0	0	0	0	0	0	0	0	0	0	0	0	0	0	0	0	0	0	0	0	0	0	0
321	NODE_2000139_length_131_cov_4.17105_g1982725_i0	131	CCTGCATTGTACAGACCTTTCTTGATTTCTCAGTTTTAATTTAACTTCTACGATTTTGCCGTAAAATGAATGCCAAAATCAAACAAAAATCATGCTTAATCTTGAGCAACTCGATTAACTATAACCCGAAC	0	0	0	0	0	0	0	0	0	0	0	0	0	0	0	0	0	0	0	0	0	0	0	0	0	0	0	0	0	0	0	0	0	0	0	0	0	0	0	0	0	0	0	0	0	0
322	NODE_2002179_length_131_cov_3.63158_g1984765_i0	131	CTTAAACTCTCGATAATCATTCATATGTCAAATTAAATATAGAATAATATAAATAAAAAATTGATTGAACACTTTTTAATTCAAATTATTCACAACTCACCGATTGGCATCTGCGGCTCGCATCTTCTTCC	0	0	0	0	0	0	0	0	0	0	0	0	0	0	0	0	0	0	0	0	0	0	0	0	0	0	0	0	0	0	0	0	0	0	0	1.93427	0	0	0	0	0	0	0	0	0	0
323	NODE_2002187_length_131_cov_3.63158_g1984773_i0	131	CACCGATGAAACTTGCTACCTACGTCTAGATCACCGCAAGATTCAAATACATGAAATTTGTCTAATGTGTAATGTTTATATAACAAATTTAGAATGTGTAATGTTTATGTAACAAATTTAGAATATGTAAT	0	0	0	0	0	0	0	0	0	0	0	0	0	0	0	0	0	0	0	0	0	0	0	0	0	0	0	0	0	0	0	0	0	0	0	0	0	0	0	0	0	0	0	0	0	0
324	NODE_2002253_length_131_cov_3.61842_g1984839_i0	131	CTAAATCATCAAAATTGATGTCATCGATATCTAAGGAAGCCAAATCGTCATCACTGATTTCCGACGCATAAGTATCGAACTCACTGAAATCGAAGTCCTCAGCATCCACATCATCGACACCTAAATCATCC	0	0	0	0	0	0	0	0	0	0	0	0	0	0	0	0	0	0	0	0	0	0	0	0	0	0	0	0	0	0	0	0	0	0	0	0	0	0	0	0	0	0	0	1.21911	0	0
325	NODE_2006961_length_131_cov_3_g1989547_i0	131	CGGCCGTGCGGCCACTGACGCGGCCGTATGGGCGACGACGATCAAAGCCACGACGAACAAGATCCTTGCAGTCGCCATTGCTATCTAACTTATTTGGTTGGATAGGAGTTTTTGTATGTCGTAACTTGTGT	0	0	0	0	0	0	0	0	0	0	0	0	0	0	0	0	0	0	0	0	0	0	0	0	0	0	0	0	0	0	0	0	0	0	0	0	0	0	0	0	0	0	0	0	0	0
326	NODE_2010126_length_131_cov_2.42105_g1992712_i0	131	CGGGCGCGGGCGGTCTCCTTAGAAGCTTTTCCCGGCAGTCGAGCGTCAATGCCTTCGTCGCCATCTCTGACAACTCCCACTCAGGTCTCACCTATAAACAGGGGGATTTGCCTCCCCGTCCAGGCTTCGCC	0	0	0	0	0	0	0	0	0	0	0	0	0	0	0	0	0	0	0	0	0	0	0	0	0	0	0	0	0	0	0	0	0	0	0	0	0	0	0	0	0	0	0	0	0	0
327	NODE_2010223_length_131_cov_2.42105_g1992809_i0	131	CTGGGTCGTCCAGAGAGGAGGTCGGGACTGCGAGGCGCGCTCATTTATTGGCGTCTTGAGCTTTGGGTGCATCCCTTGAAAACCATGGTGATCACAGTTGGACGCGTCGGTCTCGTTGTCGTACTCGAAAC	0	0	0	0	0	0	0	0	0	0	0	0	0	0	0	0	0	0	0	0	0	0	0	0	0	0	0	0	0	0	0	0	0	0	0	0	0	0	0	0	0	0	0	0	0	0
328	NODE_2010265_length_131_cov_2.42105_g1992851_i0	131	GCACAGATCTTGGTGGTAGTAGCAGCTATTTGGATGGAAGTGCCTGATCTCATGTTTAACCGCTTGAGGTTAGGGGCTCACTCCAAAGACTGACGTGGAGAAGGTTTCCCCGTGAGCAGCGCTTCCCCGGG	0	0	0	0	0	0	0	0	0	0	0	0	0	0	0	0	0	0	0	0	0	0	0	0	0	0	0	0	0	0	0	0	0	0	0	0	0	0	0	0	0	0	0	0	0	0
329	NODE_2010330_length_131_cov_2.42105_g1992916_i0	131	CGAGTCAACACATTCCATATAACCTGTTTTTCCCAATGGCTTGCTATCTACCGGCTACAACGACATCAATAATGAGCATGTCGAGGTCGAGATTATGATGGTCAACACCTCTTGTTTGTAGCACCACCACC	0	0	0	0	0	0	0	0	0	0	0	0	0	0	0	0	0	0	0	0	0	0	0	0	0	0	0	0	0	0	0	0	0	0	0	0	0	0	0	0	0	0	0	0	0	0
330	NODE_2010733_length_131_cov_2.39474_g1993319_i0	131	GGCGGGTCACCTGGATCCTGGCTCGGGGTCCCAGGTCTGTGCGACCATAAGTCCCGAGGGCACCGGGTCCTTCTAAAGTCTCCCAGGAGGACCCTCCCTCAGTCCCGTTGCTCCCAATTCCCCAGGAGTTG	0	0	0	0	0	0	0	0	0	0	0	0	0	0	1.51232	0	0	0	0	0	0	0	0	0	0	0	0	0	0	0	0	0	0	0	0	0	0	0	0	0	0	0	0	0	0	0
331	NODE_2012547_length_131_cov_2.27632_g1995133_i0	131	GATTTTTCCTATATTTCTTATATTATACGATTTCTTTTGTCTCACACGATACAGAATCTCTCTCATCTGTCCTGTTTACGTTTGCAGTAAACTTCATTAAAATAAATATACAGTTACTATTAGGAAAAATC	0	0	0	0	0	0	0	0	0	0	0	0	0	0	0	0	0	0	0	0	0	0	0	0	0	0	0	0	0	0	0	0	0	0	0	0	0	0	0	0	0	0	0	1.45398	0	0
332	NODE_2013212_length_131_cov_2.23684_g1995798_i0	131	ACGGGACTCAAGCACGTCACCGAAGCGGTGGGCGCAGTAATGCGCGGTAGGAGAGCGTTGTAGTTGCGGTGAAGCGGTACGGACAACGGGCCGTGGAGCGACTACAAGTGACTATGTCGGAACGAGCAGAC	0	0	0	0	0	0	0	0	0	0	0	0	0	0	0	0	0	0	0	0	0	0	0	0	0	0	0	0	0	0	0	0	0	0	0	0	0	0	0	0	0	0	0	0	0	0
333	NODE_2016431_length_131_cov_2.03947_g1999017_i0	131	GACCGGCGCATAGTCCCCACCGAGGTAGGGGTTCTCGCTCGGGCGGGGGGCACGGACTGAAGAGAGCGTGTCGGTCATGTGCCCACAATGGCCCATGAGTGAACACCTGTCAACCCAAATCTCTGCCAGAC	0	0	0	0	0	0	0	0	0	0	0	0	0	0	0	0	0	0	0	0	0	0	0	0	0	0	0	0	0	0	0	0	0	0	0	0	0	0	0	0	0	0	0	0	0	0
334	NODE_2018538_length_130_cov_7.36_g2001124_i0	130	GCCTGTCGTCATCTTGTTTCACCCCGCGGCAACGCGCAGCGCGCGTGTCATGGCTCCAGGCGGCCTGTCCGCCTGCGCCTTGCCCGGCAAGGTTCCGCGATGCCATAGCAAGGGCTTTGCGAACGCCTGC	0	0	0	0	0	0	0	0	0	0	0	0	0	0	0	0	0	0	0	0	0	0	0	0	0	0	0	0	0	0	0	0	0	0	0	0	0	0	0	0.612765	0	0	0	0	0	0
335	NODE_2026437_length_130_cov_3.68_g2009023_i0	130	TGCGAGAGCATCGCAGGAATCTGTAGTTAGTGGGGCAAGTGTGCAGTAAGCTGTGGTTAGGCGAGAGCCTGGTGCTTTAGATCAGAGGCTCTAAAGGGCCTAGGACTCAAGGGAGTCCGCAGCGTGGAGG	0	0	0	0	0	0	0	0	0	0	0	0	0	0	0	0	0	0	0	0	0	0	0	0	0	0	0	0	0	0	0	0	0	0	0	0	0	0	0	0	0	0	0	0	0	0
336	NODE_2027582_length_130_cov_3.48_g2010168_i0	130	CGAAGCTTATCCCTCGCAGTCTGCCTCCTGTCTTTTAAAAGTTATAGCATTCAGAGTTAGTAAGAACACGGTAAGCTTGCGCCCCCAAAATTCCAACTGTGCTTTACCGCCATAACTCATCCGACAAGGC	0	0	0	0	0	0	0	0	0	0	0	0	0	0	0	0	0	0	0	0	0	0	0	0	0	0	0	0	0	0	0	0	0	0	0	0	0	0	0	0	0	0	0	0	0	0
337	NODE_2030977_length_130_cov_3.06667_g2013563_i0	130	CGCCAACTTTCTCCTTCGAAACTACTTGATCCTGACTCACTCAACCCGACAGACTCCTCACGCACACCCTGAAGTGTGACCCGCTCTATAAGATACGGGCTTGCCCTCTAGCGTACGTAAAGGTAATATC	0	0	0	0	0	0	0	0	0	0	0	0	0	0	0	0	0	0	0	0	0	0	0	0	0	0	0	0	0	0	0	0	0	0	0	0	0	0	0	0	0	0	0	0	0	0
338	NODE_2034717_length_130_cov_2.45333_g2017303_i0	130	CCCCACAGAACAATCTGAGCATGAGGATGCATTATCCGTTTGGATCATGGTTCACTCAACCGCACAGCCAGCACGAGAGTCATCGCACCACCGCCACCTCCAGCGCAACGCGAAGTCAAGACACACCCAC	0	0	0	0	0	0	0	0	0	0	0	0	0	0	0	0	0	0	0	0	0	0	0	0	0	0	0	0	0	0	0	0	0	0	0	0	0	0	0	0	0	0	0	0	0	0
339	NODE_2043815_length_129_cov_6.56757_g2026401_i0	129	CTGGACTTCGGTCCAGATACCGCGAGCACGGCCAGTGGGTCTGATGCGCTCCGGCGTAGGATTCCCAAAGCCTGTCTGGTGGAGACACCTTGCAGTCCGCTCACCTTAACGGTGATGCAGAACCGTGCG	0	0	0	0	0	0	0	0	0	0	0	0	0	0	0	0	0	0	0	0	0	0	0	0	0	0	0	0	0	0	0	0	0	0	0	0	0	0	0	0	0	0	0	0	0	0
340	NODE_2048233_length_129_cov_4.44595_g2030819_i0	129	CAGCGATGAGGATAGGTTGTGCGAGCGGAGGGAAACCAAGCGCGGTGCAGCTATAAAAATGGGCGATGTGTTGAGATGTTTTCCGATTGACGTAGCGATACGTACGGTTAGAGGTTGCTCAACATTGAT	0	0	0	0	0	0	0	0	0	0	0	0	0	0	0	0	0	0	0	0	0	0	0	0	0	0	0	0	0	0	0	0	0	0	0	0	0	0	0	0	0	0	0	0	0	0
341	NODE_2050249_length_129_cov_3.91892_g2032835_i0	129	GCCTGATACCTCACTTGAACTGAGGTCAGCCCTATAATTCCTTGGTCATAATTTATAGACTAGCGGTAGCACCTCCGCTATTCGGATTTTGTCGGATACCAAATCCATACTAAAGATATTACATCTCTG	0	0	0	0	0	0	0	0	0	0	0	0	0	0	0	0	0	0	0	0	0	0	0	0	0	0	3.24507	0	0	0	0	0	0	0	0	0	0	0	0	0	0	0	0	0	0	0
342	NODE_2050844_length_129_cov_3.72973_g2033430_i0	129	GCGGCACATAGACCGCCTCGATGCCATCCGCGTCCTCGCGTTCTTCTCCCTAAATTCCCCCATCCGCACCGCACTCCACTTCCCGTCCTCCCTCATCCACTCTTCCTGCGGCCCAGCGCCCTCGACGAC	0	0	0	0	0	0	0	0	0	0	0	0	0	0	0	0	0	0	0	0	0	0	0	0	0	0	0	0	0	0	0	0	0	0	0	0	0	0	0	0	0	0	0	0	0	0
343	NODE_2050979_length_129_cov_3.71622_g2033565_i0	129	GCCGCCACCAACCCCAGCGCGTCCTCGGCAGCCAGTGGCGAGACGGCGGGACCGGCGGTCGGCGGCGAGGGCTAGCGCGAGCCACAGATCGCCGGGCTGACGGATCCGGCTACCTTGCATAGACTCGGC	0	0	0	0	0	0	0	0	0	0	0	0	0	0	0	0	0	0	0	0	0	0	0	0	0	0	0	0	0	0	0	0	0	0	0	0	0	0	0	0	0	0	0	0	0	0
344	NODE_2058904_length_129_cov_2.48649_g2041490_i0	129	TGCAATTACGCGCTACGGACCAGAGCCTCCTCTTCTTCAGTTGAGGCCGGCCTTTAATTTTGATCATTTGTCTGCTACTAGTAACTACTCCTGTTGATCATTGTATCACTTTTATCTATTAACCTTCAC	0	0	0	0	0	0	0	0	0	0	0	0	0	0	0	0	0	0	0	0	0	0	0	0	0	0	0	0	0	0	0	0	0	0	0	0	0	0	0	0	0	0	0	0	0	0
345	NODE_2058942_length_129_cov_2.48649_g2041528_i0	129	GGCAGCTTCATCACGAGTGAATTGTTCTTGTCCCTTTTCGAAAGCGACTTTAATGACCTCTTTCTTTTCAGCACCAGGATTATGACCACCATATGAATATTCTTCAGTATAATCATTCATAAATTCTTC	0	0	0	0	0	0	0	0	0	0	0	0	0	0	0	0	0	0	0	0	0	0	0	0	0	0	0	0	0	0	0	0	0	0	0	0	0	0	0	0	0	1.24576	0	0	0	0
346	NODE_2059018_length_129_cov_2.48649_g2041604_i0	129	AAAAGAAATAGTGCAAGGCAAGGTGACATGAACAAAATAAAGAAGAGTTACAGTAAGAAGTCGCAGCCTAGAAGGAAGTATGAGGCTGGGGCAGCTTGGAATAATTTGGAGAAGTTAACTCAATACGGC	0	0	0	0	0	0	0	0	0	0	0	0	0	0	0	0	0	0	0	0	0	0	0	0	0	0	0	0	0	0	0	0	0	0	0	0	0	0	0	0	0	0	0	0	0	0
347	NODE_2059042_length_129_cov_2.48649_g2041628_i0	129	CCCAGGATGATGGAGCAAATCCGCTGTCGACTGGTGGCGGCGATTTCGCGAGGAGAGCTGCTCATCGAGCTTCTTGAACCCATTCCGATCGATGCCTTTGCACCTCCGCCGGTGTTTTTTGACCCTCGA	0	0	0	0	0	0	0	0	0	0	0	0	0	0	0	0	0	0	0	0	0	0	0	0	0	0	0	0	0	0	0	0	0	0	0	0	0	0	0	0	0	0	0	0	0	0
348	NODE_2059199_length_129_cov_2.48649_g2041785_i0	129	TGAAAAACAGATAAGTTATATACAAAATTATATTAAGAAAAATAGTGACGAAGTTTCGTCTTGTATTAAGTCTTCAATGGTTATGAGCGACAATTTCTCTACGCTTATAAAACAGATTCATAAGAATAC	0	0	0	0	0	0	0	0	0	0	0	0	0	0	0	0	0	0	0	0	0	0	0	0	0	0	0	0	0	0	0	0	0	0	0	0	0	0	0	0	0	0	0	0	0	0
349	NODE_2059245_length_129_cov_2.48649_g2041831_i0	129	TTGTGTCATACCTTTGAATGAGCCGCCTTAAAAGCGAGGACACCCTCGTCTCTTAGTCTAACATCTGACCATTTCGGAAGAAAATTCACCAAAACACTGTGGACGTCAGGGGCCTAGGGGTTACGGTCG	0	0	0	0	0	0.745312	0	0	0	0	0	0	0	0	0	0	0	0	0	0	0	0	0	0	0	0	0	0	0	0	0	0	0	0	0	0	0	0	0	0	0	0	0	0	0	0
350	NODE_2059382_length_129_cov_2.47297_g2041968_i0	129	GGCTGCTCCGAAAGATGAACTTATTTTCTGTCCCTCACTCATCTGACTTCTTGAAAGATTCTGGCGCTCTCTGGAATTGACCTGAGGTAAAATCTCAAACACACGAACGCTCCAAAGTTAAAACCTGAC	0	0	0	0	0	0	0	0	0	0	0	0	0	0	0	0	0	0	0	0	0	0	0	0	0	0	0	0	0	0	0	0	1.42351	0	0	0	0	0	0	0	0	0	0	0	0	0
351	NODE_2062490_length_129_cov_2.28378_g2045076_i0	129	CTTGACTTCGTCAGGGCTTGGGCCTCTCTACTCTTCGCGTTATTCGGAGAGGGGGCTCAAGATTGAAACATGCAGCTCACCCTCCATGCTGTCATTGATGTGAGTTATGCGCGTTAAAGCAAAAACCGT	0	0	0	0	0	0	0	0	0	0	0	0	0	0	0	0	0	0	0	0	0	0	0	0	0	0	0	0	0	0	0	0	0	0	0	0	0	0	0	0	0	0	0	0	0	0
352	NODE_2062885_length_129_cov_2.27027_g2045471_i0	129	TGACAATAAAGTTGGTTTTTCGAAGCAAATATTGAAATGGGCAACAAACAATAAAATGAAAAACTCCACAATGTTTGTTCCAGCTGCAGAAAGAAAAGCTTTTGATGAAGAAATAAGCTTACTTACAAG	0	0	0	0	0	0	0	0	0	0	0	0	0	0	0	0	0	0	0	0	0	0	0	0	0	0	0	0	0	0	0	0	0	0	0	0	0	0	0	0	0	0	0	0	0	0
353	NODE_2065884_length_129_cov_2.02703_g2048470_i0	129	CGGCAATCGTCGCCGGCGCAGCAACCGCTCTGCAGGACAGCGATGATTCTCCAGCCAGAAGCGTGGCAGACCCGGATGCGTGAGCACGAGGAGGCTGCTGAGGAACTCCTTGCGCGCTACCGTCATCCG	0	0	0	0	0	0	0	0	0	0	0	0	0	0	0	0	0	0	0	0	0	0	0	0	0	0	0	0	0	0	0	0	0	0	0	0	0	0	0	0	0	0	0	0	0	0
354	NODE_2070974_length_128_cov_5.0411_g2053560_i0	128	ACGAATGTTTACGGTAACAGCACAGAATCTGTTTTTTGGACAGCAACTACCCCAAATCTTTCTCTCCCTCATTAGAGGTTACTCTTGGCACAAAAAACCAACAAAAAGGATAAGGAGAGGTTATTACA	0	0	0	0	0	0	0	0	0	0	0	0	0	0	0	0	0	0	0	0	0	0	0	0	0	0	0	0	0	0	0	0	0	0	0	0	0	0	0	0	0	0	0	0	0	0
355	NODE_2070995_length_128_cov_5.0274_g2053581_i0	128	CTTACCTCTGAGGGTCTGTGGACCCTTTGGAGATGAAATCCAAATAAATAGCTACTGGTGGGTACACAGGCATGAGTCTATGACTGAGACAATGTGGAAATGCTTTGGGAAAAGGACACCACTTCTAC	0	0	0	0	0	0	0	0	0	0	0	0	0	0	0	0	0	0	0	0	0	0	0	0	0	0	0	0	1.3212	0	0	0	0	0	0	0	0	0	0	0	0	0	0	0	0	0
356	NODE_2075395_length_128_cov_3.78082_g2057981_i0	128	CTGAGGGCGAGGACCCGCGCCCGCCCCGAGCAGCAGCCTGGAAGCCCACCGAGAGGATGGCCGTGACCGCCACCGTTCCGTCCGGCAGCGAGCCCGCCGCCGCACCGCGTGACCCCGAGTGGTTCAAG	0	0	0	0	0	0	0	0	0	0	0	0	0	0	0	0	0	0	0	0	0	0	0	0	0	0	0	0	0	0	0	0	0	0	0	0	0	0	0	0	0	0	0	0	0	0
357	NODE_2075562_length_128_cov_3.73973_g2058148_i0	128	ATCCTATGACCTAACCATGCACAAACGAAGAGAAAATCTCATGGGGCTACCCCCGCCGGAAGAAAATCTAGGGGGTAGACTATCCGGGGCCCGGCGATCAGGGTTTCGTAGGAACGAGCGCTTCGGGG	0	0	0	0	0	0	0	0	0	0	0	0	0	0	0	0	0	0	0	0	0	0	0	0	0	0	0	0	0	0	0	0	0	0	0	0	0	0	0	0	0	0	0	0	0	0
358	NODE_2079992_length_128_cov_3.13699_g2062578_i0	128	GCCTTGATTTAGACTCCGGCTCCCCACTGTCCCGCCCACAAATCAGGGGGAACACCCACCCCCCGGGGCGGACGGAAGGGCCAAGGACCTGTTTATGATGCCAGTGAAGCCAGGAGCCCAGAGCCGCC	0	0	0	0	0	0	0	0	0	0	0	0	0	0	0	0	0	0	0	0	0	0	0	0	0	0	0	0	0	0	0	0	0	0	0	0	0	0	0	0	0	0	0	0	0	0
359	NODE_2082104_length_128_cov_2.80822_g2064690_i0	128	CGTTTTAGAAAAAGGCATAAATAGAGATCACTTCAAAATCAATGACTTGCAGAGATAGCCATCCCTCAATTTGATCGTGATCTAGTACCTTTTCACCAGAGATTCGACTGGTTTACGTCAAGATTACG	0	0	0	0	0	0	0	0	0	0	0	0	0	0	0	0	0	0	0	0	0	0	0	0	0	0	0	0	0	0	0	0	0	0	0	0	0	0	0	0	0	0	0	0	0	0.357504
360	NODE_2083402_length_128_cov_2.52055_g2065988_i0	128	CCTCTTTTACTCTCCCAAATCGTGATTAACGATTTCCTCACAAGTTGAACAACTTTTTGTTTTCAAATCTTGCATTTCCACAAAGAATATCGCATTTCGCTGCGGTCGTCAAAGAGAAGAGATCCAAG	0	0	0	0	0	0	0	0	0	0	0	0	0	0	0	0	0	0	0	0	0	0	0	0	0	0	0	0	0	0	0	0	0	0	0	0	0	0	0	0	0	0	0	0	0	0
361	NODE_2083458_length_128_cov_2.52055_g2066044_i0	128	GTGGGCGGTATCAACCTGGGTATGCACAACAAGGCGGCATTGACGTGCATCAACGCCGCGACCGTCCGGCTACTTACGATAGGTAGTGCACCCGCGAGCGGCGGAGTGTCACGGAATATCGAACCGAG	0	0	0	0	0	0	0	0	0	0	0	0	0	0	0	0	0	0	0	0	0	0	0	0	0	0	0	0	0	1.39031	0	0	0	0	0	0	0	0	0	0	0	0	0	0	0	0
362	NODE_2083463_length_128_cov_2.52055_g2066049_i0	128	GGACGAGATGCCTGAACAATCCAGGGGTCGCCGTGATGGCTGAGGAGTGTGTCTCATTAGAATTATGAGGTGCGCTCTGTGTCAATCCGCATCTTTATTTCTTTATTGGCTGGAAAGAGAAGTGTTGG	0	0	0	0	0	0	0	0	0	0	0	0	0	0	0	0	0	0	0	0	0	0	0	0	0	0	0	0	0	0	0	0	0	0	0	0	0	0	0	0	0	0	0	0	0	0
363	NODE_2083496_length_128_cov_2.52055_g2066082_i0	128	CTGACTACACTTGGATTGGCGGGTTATAGCGCGACCAGAGCACGTTCTTTCCACGAAGCCCTAGCTCTCCAAGGGTCTCTACAAGAGCTCAGCTTAAGTGGTGAATGCATTGAATACCCCGAAGATAT	0	0	0	0	0	0	0	0	0	0	0	0	0	0	0	0	0	0	0	0	0	0	0	0	0	0	0	0	0	0	0	0	0	0	0	0	0	0	0	0	0	0	0	0	0	0
364	NODE_2083517_length_128_cov_2.52055_g2066103_i0	128	CTACATTCAGCACATGGTGCACGACATCAAAACGCAGTCGCATACCATTTATCTTAATTCGGACACCATGCTGCAATCCGCACAGCAGACTGTTGACAAAATTAATGTGCAAACTAAGGAAATTGAAC	0	0	0	0	0	0	0	0	0	0	0	0	0	0	0	0	0	0	0	0	0	0	0	0	0	0	0	0	0	0	0	0	1.42351	0	0	0	0	0	0	0	0	0	0	0	0	0
365	NODE_2083707_length_128_cov_2.52055_g2066293_i0	128	TTGTGCTACAGACGATTACAGTTCCCGCATTAGGTGAAGGTGAGCATTGTTGTATTGTGCGCATGTCGGAAGCCGTAGTGGAACAACTGCTCGATTCCAAGGAAGCAGATGCGCGAGAATACCTGGAG	0	0	0	0	0	0	0	0	0	0	0	0	0	0	0	0	0	0	0	0	0	0	0	0	0	0	0	0	0	0	0	0	0	0	0	0	0	0	0	0	0	0	0	0	0	0
366	NODE_2083721_length_128_cov_2.52055_g2066307_i0	128	CCCCAAGTGACAAACCCCGAGTATGCGCCGATTTCGGCCTTAATAGGGCTTTGCTACTAGGGGTCTGTGCGAAGGGGTGCTCCTGCGGAGCTCGAAAGCTATGCGTACGCGAGGCGCCGCGTGCCGTC	0	0	0	0	0	0	0	0	0	0	0	0	0	0	0	0	0	0	0	0	0	0	0	0	0	0	0	0	0	0	0	0	0	0	0	0	0	0	0	0	0	0	0	0	0	0
367	NODE_2083973_length_128_cov_2.49315_g2066559_i0	128	GGTATTCGGAGAATTCAGCTGCTCCGCGTGCTTTATAATTACTGCTCATTTTCTCATAATCGCCCCCTCTTCTCCTCCTTTGATCGCCGTCCGCGTGTTCACGTCGAGACACGTCTCCCAAGTCGCGC	0	0	0	0	0	0	0	0	0	0	0	0	0	0	0	0	0	0	0	0	0	0	0	0	0	0	0	0	0	0	0	0	0	0	0	0	0	0	0	0	0	0	0	0	0	0
368	NODE_2085414_length_128_cov_2.39726_g2068000_i0	128	GGACGTCTGTGGACTGGTCTACCAGCTGGTCGGGCAGTGATAAAGTCAGGTTGCTAGTCGAAGCCGTTGGAAAGCGGCGCCGTAGACGGTGATAGTCCGGTAGGCGAAAGCGTCTGGCCTGTCTGATG	0	0	0	0	0	0	0	0	0	0	0	0	0	0	0	0	0	0	0	0	0	0	0	0	0	0	0	0	0	0	0	0	0	0	0	0	0	0	0	0	0	0	0	0	0	0
369	NODE_2086337_length_128_cov_2.34247_g2068923_i0	128	GAGATTACAGTAGGGGGATCAAGATGGTGTTGTTGTAGATGGTGATGATGAACACGCCGGAGGGGGGTGGAGCCTACCGGAGGCAATTCTGGCAGTGTTTCCCCCTCCAAACTCCTCCGGCGGCAACC	0	0	0	0	0	0	0	0	0	0	0	0	0	0	0	0	0	0	0	0	0	0	0	0	0	0	0	0	0	0	0	0	0	0	0	0	0	0	0	0	0	0	0	0	0	0
370	NODE_2087005_length_128_cov_2.31507_g2069591_i0	128	GTGCTCTTCCGATCTCTTAAGTTCAGATTGGTCGTGTCGGTGTCTTCAGAAAAGGGGGCACCAAGCGACTTACCATAATTTCAATTATTACTCAAGCAGATCATTTGTAGACGACTTAGAAAGGAGAG	0	0	0	0	0	0	0	0	0	0	0	0	0	0	0	0	0	0	0	0.628148	0	0	0	0	0	0	0	0	0	0	0	0	0	0	0	0	0	0	0	0	0	0	0	0	0	0
371	NODE_2087880_length_128_cov_2.27397_g2070466_i0	128	TGGATGATAAATGAAAAAGTCCAGAGGACTGGTTGCTGAGAGAAAGCATAGGATCATGGGATCATCAGTGTTCGGGTGGAACATCGATGGTCTAACACAGCTACTGATTTTGCTGTGGGGCATCAGAG	0	0	0	0	0	0	0	0	0	0	0	0	0	0	1.27602	0	0	0	0	0	0	0	0	0	0	0	0	0	0	0	0	0	0	0	0	0	0	0	0	0	0	0	0	0	0	0
372	NODE_2093270_length_127_cov_6.38889_g2075856_i0	127	GGGATCCATAGAAGAGTGAGCGTGCAAGCGGATCTCCTCACGAGATGGCATGCATCGGGGCTAGAGGAGCTCTAGCAGCGGCAGAACTAATTGCTCGTTTCCTCCGAGGTATTGAGGGAAGCTCATT	0	0	0	0	0	0	0	0	0	0	0	0	0	0	0	0	0	0	0	0	0	0	0	0	0	0	0	0	0	0	0	0	0	0	0	0	0	0	0	0	0	0	0	0	0	0
373	NODE_2096758_length_127_cov_4.65278_g2079344_i0	127	GGCATGGGGATGGATTTAATGGGTGTTGCATGGACAAGATAGTTCATGTGATATTCTAAGCATGGCATTTGCAGATAAAGATAATAAGTATCCCAGTACTAAACAATCATAGACATGTGTTCCATAT	0	0	0	0	0	0	0	0	0	0	0	0	0	0	0	0	0	0	0	0	0	0	0	0	0	0	0	0	0	0	0	0	0	0	0	0	0	0	0	0	0	0	0	0	0	0
374	NODE_2099725_length_127_cov_3.83333_g2082311_i0	127	GAGGAAGGGAAGGGGAAGGCTAGGGTTGAGCAGGGGGTTCGGCCTCCTCTTTATAGCACTGGGAACGACGGAAAGGAGGCGCCATGGGGACCAGCTCCGTCTTCTGGATACTGAAACCTGACGGAAT	0	0	0	0	0	0	0	0	0	0	0	0	0	0	0	0	0	0	0	0	0	0	0	0	0	0	0	0	0	0	0	0	0	0	0	0	0	0	0	0	0	0	0	0	0	0
375	NODE_2101100_length_127_cov_3.59722_g2083686_i0	127	CATGGATCGTGGTCAAGGCTGCGATCGTGGCATCCACGGGAGTGCGCAGGATTACCAGAGCGGGCATCGGTTCATCCCTTTGCAGCGCAGGCGAACCGAGGCGGCTCCCGGAGATCGGAAGAGCGTC	0	0	0	0	0	0	0	0	0	0	0	0	0	0	0	0	0	0	0	0	0	0	0	0	0	0	0	0	0	0	0	0	0	0	0	0	0	0	0	0	0	0	0	0	0	0
376	NODE_2107160_length_127_cov_2.73611_g2089746_i0	127	GCAAATTGAATGGCTGATTGGATGCAGTTGGGTGGTCGCTTCGTTTGGAGTGTCCAGGAGAGGATTTTCTGGTTATGTAGTCAGGGATTGATTGGAGGTTTGTGGTTGATTAGGTAGATCGGAAGAG	0	0	0	0	0	0	0	0	0	0	0	0	0	0	0	0	0	0	0	0	0	0	0	0	0	0	0	0	0	0	0	0	0	0	0	0	0	0	0	0	0	0.402175	0	0	0	0
377	NODE_2107335_length_127_cov_2.69444_g2089921_i0	127	AAACGATCTACGTAGAAATCGATATCTGGGTCACCATGAAGAAATAATGGCGGGAACGATCACGTGTGTGCAATATGAAAAACACTGACGCATAGCCCGACTATCAATCCGCCAAAGCAGCCACCAG	0	0	0	0	0	0	0	0	0	0	0	0	0	0	0	0	0	0	0	0	0	0	0	0	0	0	0	0	0	0	0	0	0	0	0	0	0	0	0	0	0	0	0	0	0	0
378	NODE_2107818_length_127_cov_2.55556_g2090404_i0	127	CACCGCTGGGAGCGGCGCCGTAGGGGTTGATCGCGCCGTACTGGCCGGAGGAGCCCTGCGCAGCAGGGGCATCCTGGCCGGCGGCATCCTGGCCGGCGAAGGGATCCTGGCCGGCGGAGGGACCCTG	0	0	0	0	0	0	0	0	0	0	0	0	0	0	0	0	0	0	0	0	0	0	0	0	0	0	0	0	0	0	0	0	0	0	0	0	0	0	0	0	0	0	0	0	0	0
379	NODE_2107837_length_127_cov_2.55556_g2090423_i0	127	GGTGAGTCTAGCATTTTAGCGATCGAAGAAAAGAGAGGTGAAGCTCGGATAACTGCGTGAGAGGAGAAGGCGACATACAAGTCAGGGTCCAGCGCCGCAGCAGTGGATCTCGACATCAGCGTCGTCG	0	1.56435	0	0	0	0	0	0	0	0	0	0	0	0	0	0	0	0	0	0	0	0	0	0	0	0	0	0	0	0	0	0	0	0	0	0	0	0	0	0	0	0	0	0	0	0
380	NODE_2107917_length_127_cov_2.55556_g2090503_i0	127	CAAATTCCTAAACAATTAGCATACCCAAGACCAAAAAGAATACTTAACCCAACTTCAAACCGACCATATAACATATAGAAAAAGTATAAAACAACTCTATCTCAACCAAATTACTCTCAACATTAAC	0	0	0	0	0	0	0	0	0	0	0	0	0	0	0	0	0	0	0	0	0	0	0	0	0	0	0	0	0	0	0	0	0	0	0	0	0	0	0	0	0	0	0	0	0	0
381	NODE_2107969_length_127_cov_2.55556_g2090555_i0	127	CAGAACTCATCCATGAGGAAACAATGGCATGAGATGGGGCACTTAGGAGTAGTTCTATATTGTTTCATTAGATGTGCCATAGGAGTTGAGGGGAGGATGGCGGCAGGGTCTGGGGTCATTGAGGTCC	0	0	0	0	0	0	0	0	0	0	0	0	0	0	0	0	0	0	0	0	0	0	0	0	0	0	0	0	0	0	0	0	0	0	0	0	0	0	0	0	0	0	0	0	0	0
382	NODE_2108025_length_127_cov_2.55556_g2090611_i0	127	CTAGATCCTCGGTGGTGCCGCGAGAGTCTTTCAGATCTTTATATCTTTGCTTTATCTTTTCGCAACAAAAGAAAAATCGAAAACTTCTCATTTTCCTTGTTCATCTGTTCTATCTATCTCTTTCTAT	0	0	0	0	0	0	0	0	0	0	0	0	0	0	0	0	0	0	0	0	0	0	0	0	0	0	0	0	0	0	0	0	0	0	0	0	0	0	0	0	0	0	0	0	0	0
383	NODE_2108036_length_127_cov_2.55556_g2090622_i0	127	GAAGAATTTCTGCAATACGGTGTTCCGCAATACCGACATCACTGCGATGGATTCCACTCACTTCAAGGAGCTGTACACCATATTTATGGCTGCTATTCTCAATAAAGCCTGGGGACACATACTCAAC	0	0	0	0	0	0	0	0	0	0	0	0	0	0	0	0	0	0	0	0	0	0	0	0	0	0	0	0	0	0	0	0	0	0	0	0	0	0	0	0	0	0	0	0	0	0
384	NODE_2108061_length_127_cov_2.55556_g2090647_i0	127	GTGTGCCACATTCTCAGCAATGTCCAGATACAAAACTATCCTCTGCATCATAGTTGGAGTTACTGGGCCCTTTTCCAAAGATTTGGATATCAACCGTGATCAGTCCCCAGCCACCCTCTCTTGAACC	0	0	0	0	0	0	0	0	0	0	0	0	0	0	0	0	0	0	0	0	0	0	1.52988	0	0	0	0	0	0	0	0	0	0	0	0	0	0	0	0	0	0	0	0	0	0	0
385	NODE_2108255_length_127_cov_2.54167_g2090841_i0	127	GAGTGAAGGCTCCCACAGGGATGCTTTTATCGTAGTGTAAGTTGTTGGTTTTCTACGGATCTAAATAGTCGCATCATAGAGATGTGTTAATACAGAATTACAATGCAGGTATCAGTAACGTCTAAAG	0	0	0	0	0	0	0	0	0	0	0	0	0	0	0	0	0	0	0	0	0	0	0	0	0	0	0	0	0	0	0	0	0	0	0	0	0	0	0	1.51732	0	0	0	0	0	0
386	NODE_2108285_length_127_cov_2.54167_g2090871_i0	127	GTTGGTATGGTTGGTTAGTGAGCGAGCCGATGCTACACGAAGTGGGCTTCTTTACTCGAGAAGAAGCCAGAGACGTTTCAACCTTCGCACAACGTTTGTGCGGCTATAGGCCACGGACGGACCGTCT	0	0	0	0	0	0	0	0	0	0	0	0	0	0	0	0	0	0	0	0	0	0	0	0	0	0	0	0	0	0	0	0	0	0	0	0	0	0	0	0	0	0	0	0	0	0
387	NODE_2108362_length_127_cov_2.54167_g2090948_i0	127	ACCGACTTCAACCAGATCGTGGGCAAGCCCGGGATCTCGGCGATGCCCGAGCCCGGCACTGGCCAGTCCACCGACATGCAGCTGACCGGGTCCACGAAGCAGGCCCCCGCCCCGCAGCAGGGACAGC	0	0	0	0	0	0	0	0	0	0	0	0	0	0	0	0	0	0	0	0	0	0	0	0	0	0	0	0	0	0	0	0	0	0	0	0	1.64219	0	0	0	0	0	0	0	0	0
388	NODE_2108468_length_127_cov_2.52778_g2091054_i0	127	GAAATCTCCTGAAAGGGAGAAAGAAAGAAAAGGCTGACAGTCAGAAAGAATAAAAGTTCATCAGAACTAAGAGTTAGAGACAAGAAGTCACTTAAGTGGATAGAAGAAGAAACAAGGATGATGAAAG	0	0	0	0	0	0	0	0	0	0	0	0	0	0	0	0	0	0	0	0	0	0	0	0	0	0	0	0	0	0	0	0	0	0	0	0	0	0	0	0	0	0	0	0	0	0
389	NODE_2113516_length_127_cov_2.25_g2096102_i0	127	CACGATGCTCTTCCGATCTGTAGACTCTGACCGGATTCGAACCCGTGACCTGTCCTGCGACTGCTCTACCGCTGAGCTACAGAATCATCCATACGTCCCGGAGAAGAGCGCTCTTCTCCCGTTCGAG	0	0	0	0	0	0	0	0	0	0	0	0	0	0	0	0	0	0	0	0	0	0	0	0	0	0	0	0	0	0	0	0	0	0	0	0	0	0	0	0	0	0	0	0	0	0
390	NODE_2113521_length_127_cov_2.25_g2096107_i0	127	GTTGGAAGTGTTCTTCTGTACAGCAGTTAGGAAAATAATATCTTTCACTTTAAAATTGTGTTAGAAAGAAATTAAGTTTGATGGAGAGCTAATGACAGCCTGTGGTCTCTGAAAGGTAGTAGTCATA	0	0	0	0	0	0	0	0	0	0	0	0	0	0	0	0	0	0	0	0	0	0	0	0	0	0	0	0	0	0	0	0	0	0	0	0	0	0	0	0	0	0	0	0	0	0
391	NODE_2118064_length_126_cov_6.47887_g2100650_i0	126	GCCGGGTCAAACCTAGGCACTGAGTGATGTGACCAGTGTCCGTGTCCTGCCGATTGCACACTGCCCTGGCTGGAATGGGAAACGTCGATTTCAACACCTTGACTCCAAGCAGTCCATTGGGCTGCA	0	0	0	0	0	0	0	0	0	0	0	0	0	0	0	0	0	0	0	0	1.60164	0	0	0	0	0	0	0	0	0	0	0	0	0	0	0	0	0	0	0	0	0	0	0	0	0
392	NODE_2124413_length_126_cov_3.88732_g2106999_i0	126	CCAGAAGTGAAGCAAGATTAAAACAAATAATATTTATAGATAACAGGCTTCTGTATTTGTTATGCAGAAGCCTGTATTTTATTGTGCTGAATTAATGTGCATTTCGCGAAATCTAGTCAATACACT	0	0	0	0	0	0	0	0	0	0	0	0	0	0	0	0	0	0	0	0	0	0	0	0	0	0	0	0	0	0	0	0	0	0	0	0	0	0	0	0	0	0	0	0	0	0
393	NODE_2132733_length_126_cov_2.59155_g2115319_i0	126	CTGAATCCTGCCCTCCCTCGAAGTCGTTCTAGGATCCCTTGATAGACTCTCCCCTTGAGTTATAATCCAAGTGAGAGTGAAAGGTTACATGCTACAGGTAGAGTTTATACAGACTATGAATCATTG	0	0	0	0	0	0	0	0	0	0	0	0	0	0	0	0	0	0	0	0	0	0	0	0	0	0	0	0	0	0	0	0	0	0	0	0	0	0	0	0	0	0	0	0	0	0
394	NODE_2132943_length_126_cov_2.59155_g2115529_i0	126	CGGAGACCGTCCAGCGGGCGGTGCCGCTGCTCGCCGCCGCCGGTCAGGCGCTGGCCGCCGACCTGAGCTGACCCGAGCACCTGAGCCGACCCGAGCACATCAGCCGACCCGAGCCGGGGAAGATCC	0	0	0	0	0	0	0	0	0	0	0	0	0	0	0	0	0	0	0	0	0	0	0	0	0	0	0	0	0	0	0	0	0	0	0	0	0	0	0	0	0	0	0	0	0	0
395	NODE_2133005_length_126_cov_2.59155_g2115591_i0	126	CCGCTGTTTTGAGAAATATCTCTTCGTAACCGTATCTGTTTTGACTGTTTGAATGAGCTGTTCACAGACCCGACTTTGTAACACCAAGATGCCACTGGCTTGCTCAGACACTTGCATGGCTTAACC	0	0	0	0	0	0	0	0	0	0	0	0	0	0	0	0	0	0	0	0	0	0	0	0	0	0	0	0	0	0	0	0	0	0	0	0	0	0	0	0	0	0	0	0	0	0
396	NODE_2133068_length_126_cov_2.59155_g2115654_i0	126	CGATCCGACGCGGGCAGCGCCGCTCACACAAAAGGATCCTCCAGAGCACGTATCGTTCCGGGCAATGGAGGTCGTGAGTAGTCCCCAACGTGTACATGCGAAAGGGACCTGCCAAGACCAAACGCG	0	0	0	0	0	0.745312	0	0	0	0	0	0	0	0	0	0	0	0	0	0	0	0	0	0	0	0	0	0	0	0	0	0	0	0	0	0	0	0	0	0	0	0	0	0	0	0
397	NODE_2133129_length_126_cov_2.57746_g2115715_i0	126	CCAACAGCATCTCCAACCCTAGAACCACCACAATTTACTAGATATCAAAAACATAAAACATGAATGACATGTTCCACTTCAATCTCATTAGCCACATACCACAATAAAGACCCCACATAATTCCAC	0	0	0	0	0	0	0	0	0	0	0	0	0	0	0	0	0	0	0	0	0	0	0	0	0	0	0	0	0	0	0	0	0	0	0	0	0	0	0	0	0	0	0	0	0	0
398	NODE_2133254_length_126_cov_2.57746_g2115840_i0	126	CCCACTTCTGTCCATTTTCCTTTTTCTCGGGTCTTCCTCATTTGTCTCTCTTCTTTACTTCATCCTCTGTATCCACTGCTTATCTTTCTCTCTTTCCTTTACTAATCTTCCTCTTTTTCCTTCCTC	0	0	0	0	0	0.745312	0	0	0	0	0	0	0	0	0	0	0	0	0	0	0	0	0	0	0	0	0	0	0	0	0	0	0	0	0	0	0	0	0	0	0	0	0	0	0	0
399	NODE_2133323_length_126_cov_2.56338_g2115909_i0	126	CTATCATTGAGTTTGAATAATTCTGCTGCAATCAACACACTAAGTCTTCAGTTTCCATGGGTATAAACTGAAAGGGTGTTTACTGGAATTACAGTGGCAGAGGGAATTTTTCGAACTCAATGATAG	0	0	0	0	0	0	0	0	0	0	0	0	0	0	0	0	0	0	0	0	0	0	0	0	0	0	0	0	0	0	0	0	0	0	0	0	0	0	0	0	0	0	0	0	0	0
400	NODE_2135962_length_126_cov_2.40845_g2118548_i0	126	CCGCTTCCTCCGACTCGACCGACGCCATGGCCGTCGACCCCGAGCCTTCCACTTCTTCCTCCTCGACCCCTGCTCCCGCGACATCAGCAGCGACGAAGAAGAAGGAGGAGGAGGCCAAGGCGGGCG	0	0	0	0	0	0	0	0	0	0	0	0	0	0	0	0	0	0	0	0	0	0	0	0	0	0	0	0	0	0	0	0	0	0	0	0	0	0	0	0	0	0	0	0	0	0
401	NODE_2137367_length_126_cov_2.35211_g2119953_i0	126	ACGGCGACGCGTGGACAGCGTGGTGCGACAGCGGCGCGAGCTGCGGGTGAGCTGAGGGCTGCGCGCCGTCGAGCTGCCGGTCGGCCGACAGCTTCTCGTACTCGGTCTTAAGCGCCAAGTAGGCCT	0	0	0	0	0	0	0.780716	0	0	0	0	0	0	0	0	0	0	0	0	0	0	0	0	0	0	0	0	0	0	0	0	0	0	0	0	0	0	0	0	0	0	0	0	0	0	0
402	NODE_2138905_length_126_cov_2.26761_g2121491_i0	126	AAGTGGATCTCCTATAGCATCCGCGCTCACATTTGTTGGCTTGACCACCGTCTTTTCAGTATTAGCCGCTGGGTCTCCAGGTAAGGCATCGGCAGTGCATGATTGTAAAACAATACTAAAAACAAA	0	0	0	0	0	0	0	0	0	0	0	0	0	0	0	0	0	0	0	0	0	0	0	0	0	0	0	0	0	0	0	0	0	0	0	0	0	0	0	0	0	0	0	0	0	0
403	NODE_2139777_length_126_cov_2.1831_g2122363_i0	126	CTAGGGCTGTGTAGACTGACTAGGAGAAAAGAGAGAAGACTCAAATTGTTGAAGTCGAGAATTAAAGAGGGAATATCATCGCTAATTTTGCAGAAATAAAAATTATTATAAGGGAATGGTATGAAC	0	0	0	0	0	0	0	0	0	0	0	0	0	0	0	0	0	0	0.621766	0	0	0	0	0	0	0	0	0	0	0	0	0	0	0	0.640127	0	0	0.454826	0	0	0	0	0	0	0	0
404	NODE_2139897_length_126_cov_2.15493_g2122483_i0	126	TGTGAAGCCGTGGGCCCCAGTTTGGTATTCTTGGAGTGTAGATCGCTGTGATATGCAGCCCTCGGCTTGGTTCCTTGGGCTGCCCCAACAATTTGGTGTAGCGCTGGAATCGGGTTTTCTTCTGTG	0	0	0	0	0	0	0	0	0	0	0	0	0	0	1.51232	0	0	0	0	0	0	0	0	0	0	0	0	0	0	0	0	0	0	0	0	0	0	0	0	0	0	0	0	0	0	0
405	NODE_2140610_length_126_cov_2_g2123196_i0	126	GTTCATACCATTCCCTTATAATAATTCTTATTTCTGTAAAATTAGCGATGATATTCCCTCCCTAATTCTCGATTTCAACAATTTGAGTCTTCTCTCTTTCTTCTCAGTCAGTCTACACAGCCCTAG	0	0	0	1.03937	0	0	0	0	0	0	0	0	0	0	0	0	0	0	0	0	0	0	0	0	0	0	0	0	0	0	0.616456	0	0	0	0	0	0	0	0	0	0	0	0	0.552344	0	0
406	NODE_2145217_length_125_cov_5.25714_g2127803_i0	125	ACTCAACAAGAATTTCTAGGTCTTGTTGATGACTTCTTTGAAGACTTTTTCGTGGACTCGCTAGGCGAGTGCTGCACTACCCAAGTGAACGAACAATTTGTACAAACATGTGGTCAAGAACTGGA	0	0	0	0	0	0	0	0	0	0	0	0	0	0	0	0	0	0	0	0	0	0	0	0	0	0	0	0	2.65276	0	0	0	0	0	0	0	0	0	0	0	0	0	0	0	0	0
407	NODE_2145979_length_125_cov_4.95714_g2128565_i0	125	CGCACGCAAGACTCTCCCAAGATTAATTTTGTACAACAAGTCAATATATATGTTTCTGCGATCGGTCGAAGCGCTTTCTTACAGATTCCTTTGCAGAAGGAATGGCGAGTGGGGTCCATCTCGAT	0	0	0	0	0	0	0	0	0	0	0	0	0	0	0	0	0	0	0	0	0	0	0	0	0	0	0	0	0	0	0	0	0	0	0	0	0	0	0	0	0	0	0	0	0	0
408	NODE_2149515_length_125_cov_3.94286_g2132101_i0	125	GCCTTGACGACGGCAACGACGACCACGACGGCAGAGACAGATGGCGCAGCGAACCTCGCCGCCTTGCCGCGACATGTGGTCGCGCGGTTGAGGAAGAAGAGCGCGGCGTTGAACCTTGATGAACC	0	0	0	0	0	0	0	0	0	0	0	0	0	0	0	0	0	0	0	0	0	0	0	0	0	0	0	0	0	0	0	0	0	0	0	0	0	0	0	0	0	0	0	0	0	0
409	NODE_2151313_length_125_cov_3.64286_g2133899_i0	125	TCGGCGCTCAGGCTCGGGTTGTCGAGCGCCAGCACGACCTGGCCCGCCGCCACGGCCGCACCGCGCTCGACGCCGGCCGAGCGGACCTGCCCCGCCACCGGCGCGCGGACGATGGCTTCATCGGG	0	0	0	0	0	0	0	0	0	0	0	0	0	0	0	0	0	0	0	0	0	0	0	0	0	0	0	0	0	0	0	0	0	0	0	0	0	0	0	0	0	0	0	0	0	0
410	NODE_2154277_length_125_cov_3.25714_g2136863_i0	125	GCGATGTACGGGTATGCGCCGCCGCCTATGGCTGCCGCCCCGGCGAGGCATCGGGGAGGGATGGGCATGGGTCTAGGCCTCGGGCTCCTCGGTGGCGCGGTCGGAGGGATGATGCACTAGTGGAC	0	0	0	0	0	0	0	0	0	0	0	0	0	0	0	0	0	0	0	0	0	0	0	0	0	0	0	0	0	0	0	0	0	0	0	0	0	0	0	0	0	0	0	0	0	0
411	NODE_2155992_length_125_cov_3_g2138578_i0	125	GCTCCCTAAACTCACATGTACTCCTCTCATGTGCCGTCCACAGCAGGCATACCTTATTGAAGGGTATGCGCCAGTCGATTAGTTGTAGGCATCAATCGAGAAATGCCAGCTTTTTACTAAAAAAT	0	0	0	0	0	0	0	0	0	0	0	0	0	0	0	0	0	0	0	0	0	0	0	0	0	0	0	0	0	0	0	0	0	0	0	0	0	0	0	0	0	0.338848	0	0	0	0
412	NODE_2157264_length_125_cov_2.74286_g2139850_i0	125	ATGATGATAGGTAGCGTATCAACATGATCTCTGGCCCCCGTGCTTTATTGCATTGATACTTCAACGAGAGATCTGCGCTCTTCTGCTTGTTGAGGTCGCGGACTGAGGTTCTCATCGAGCTTCCG	0	0	1.91932	0	0	0	0	0	0	0	0	0	0	0	0	0	0	0	0	0	0	0	0	0	0	0	0	0	0	0	0	0	0	0	0	0	0	0	0	0	0	0	0	0	0	0
413	NODE_2157652_length_125_cov_2.62857_g2140238_i0	125	ATGCTGCATTCATCCCATGCCCATTCATCCTGACGACTTTAGCCAGTAACTTTATTTAAGCTTTCGGAAGGCAATATTAGGACGCAATATTGCCATAGCTGGAAGGGTGAGTAAGCCAGCTGTGA	0	0	0	0	0	0	0	0	0.687359	0	0	0	0	0	0	0	0	0	0	0	0	0	0	0	0	0	0	0	0	0	0	0	0	0	0	0	0	0	0	0	0	0	0	0	0	0
414	NODE_2157830_length_125_cov_2.62857_g2140416_i0	125	TGCGTTAGTTTAGCCATCTGTACTCTGATACATTACCGCTAATTGCTAGTAACATGAAATTGTACTTCCTTCTTCCTGGGTGTTTGTCACATGTTATTAGTACTCGTGCCTAAACATATCTACCA	0	0	0	0	0	0	0	0	0	0	0	0	0	0	0	0	0	0	0	0	0	0	0	0	0	0	0	0	0	0	0	0	0	0	0	0	0	0	0	0	0	0	0	0	0	0
415	NODE_2157902_length_125_cov_2.62857_g2140488_i0	125	ACCACCTTCTCTAGGTCTCTGCTTGCTGTAATATCTGTCACTTACCCGCGGAGGTAAAGGCCTTGTTACGATTTCTGAATGTTACTCCGGCGTAGTGTAGGCGCTGGGGTGCCATTGCCATAGGC	0	0	0	0	0	0	0	0	0	0	0	0	0	0	0	0	0	0	0	0	0	0	0	0	0	0	0	0	0	0	0	0	0	0	0	0	0	0	0	0	0	0	0	0	0	0
416	NODE_2158294_length_125_cov_2.6_g2140880_i0	125	ATTTTCTTTTCCGGAAACTCCACGGCCCCTCGCGACGCCGCTTCAACGCATACCGGAATGCTCCCCTACCAGTCATATTGCTATGAATCCAAAGCTTCGGTACTGTGCTTGATGCCCGGTTATTT	0	0	0	0	0	0	0	0	0	0	0	0	0	0	0	0	0	0	0	0	0	0	0	0	0	0	0	0	0	0	0	0	0	0	0	0	0	0	0	0	0	0	0	0	0	0
417	NODE_2162834_length_125_cov_2.35714_g2145420_i0	125	GGAGGGCGTGGCAGGTGGGCGCTACACGCCGGGCTGCTTCGTGCCAGATTCAACGCGACCATCACCTTCGGCGGCGAGGACCAAAGCTCTTTTCCTCCAGTGTCGGACGAGGAGGGGCGTCACCG	0	0	0	0	0	0	0	0	0	0	0	0	0	0	0	0	0	0	0	0	0	0	0	0	0	0	0	0	0	0	0	0	0	0	0	0	0	0	0	0	0	0	0	0	0	0
418	NODE_2164564_length_125_cov_2.22857_g2147150_i0	125	CTCTCGGCCGCCTCTGCACACCATTTCGGGAACAAAGCGCCCTCACCCTTTCGGGACGCCCGCAACTAATCGGGCGCTGGCGATTCGAAGTGCGTCACTCCAGGATAACACAGACACGGTGCCGG	0	0	0	0	0	0	0	0	0	0	0	0	0	0	0	0	0	0	0	0	0	0	0	0	0	0	0	0	0	0	0	0	0	0	0	0	0	0	0	0	0	0	0	0	0	0
419	NODE_2165450_length_125_cov_2.1_g2148036_i0	125	CTAGATTACAATCTCATATGTCACCTAGAGATCATATCATAAAAGAGAGAGATGTGAACCACATAGCTTCAGTAGAGCCCTAAACCTCAAGGAGAACTACTCCCTCCTCATCATGGAAGAAGAAC	0	0	0	0	0	0	0	0	0	0	0	0	0	0	0	0	0	0	0	0	0	0	0	0	0	0	0	0	0	0	0	0	0	0	0	0	0	0	0	0	0	0	0	0	0	0
420	NODE_2166312_length_124_cov_12.2609_g2148898_i0	124	CTGGAAACTCTAAATATAGAAGCGAACACAGTGAGTTGAAACATCTTCTTAGCTGTCGTAATTGCAGTAGCGGGCTGCCTGGTAGTGGCGAACGAAGGGTGGTTTCTGTTTGCGTGTGCTGTGT	0	0	0	0	0	0	0	0	0	0	0	0	0	0	0	0	0	0	0	0	0	0	0	0	0	0	0	0	0	0	0	0	0	0	0	0	0	0	0	0	0	0	0	0	0	0
421	NODE_2169828_length_124_cov_5.57971_g2152414_i0	124	TGTGCTCTTCCGATCTACGTGGTTAGCCACTAAAACCCTGATATATAATCAAGCATTGATCCTGCGTGTGAGCTTGTTGTGCGCGTGATACGCTTTACCACTTCGACATGGTAGATCGGAAGAG	0	0	0	0	0	0	0	0	0	0	0	0	0	0	0	0	0	0	0	0	0	0	0	0	0	0	0	0	0	0	0	0	0	0	0	0	0	0	0	0	0	0	0	0	0	0
422	NODE_2174671_length_124_cov_3.95652_g2157257_i0	124	CGGGTTCGGCCGAGTGGTCAGCGCTCGCCGGACGATTCCTCTCTGCGGACAGTTCTCTCGGGGTGACCCGCACCGGCTCGTGCACCACCGGCGCGTAGGACGCGTAGCGTCGAGCTGACCGCCG	0	0	0	0	0	0	0	0	0	0	0	0	0	0	0	0	0	0	0	0	0	0	0	0	0	0	0	0	0	0	0	0	0	0	0	0	0	0	0	0	0	0	0	0	0	0
423	NODE_2177401_length_124_cov_3.5942_g2159987_i0	124	TAACATGGCAAGATGAATAGAAACATACTTAGCAACCATGCTATAATCATGACAAGTGACACAAACAAAAGATCATGAATAACAGTTCATTGAAAGTCACAAGTTTGCATTAACAACAAAGCAT	0	0	0	0	0	0	0	0	0	0	0	0	0	0	0	0	0	0	0	0	0	0	0	0	0	0	0	0	0	0	0	0	0	0	0	0	0	0	0	0	0	0	0	0	0	0
424	NODE_2179151_length_124_cov_3.33333_g2161737_i0	124	CTGAGAAGCAGTAGGCTTGGCTTGCGCAGAATCAACAGTCGAAGAATTAGATTGGGAAGAAGTAGACGGCTCAGCTGAGGCAGACGGCTCAGTTGGGGTAAGCTGCACGGTTGGAACAGGCGGC	0	0	0	0	0	0	0	0	0	0	0	0	0	0	0	0	0	0	0	0	0	0	0	0	0	0	0	0	0	0	0	0	0	0	0	0	0	0	0	0	0	0	0	0	0	0
425	NODE_2182079_length_124_cov_2.86957_g2164665_i0	124	CTCCCCTTCCAGAAAAATCATCTAATGATGGTGGTCCAGGATTCCAAATTTGTGTTTGTAATCACAAACATGGATCTGTGGTAGATTAGAGTGCCACTCAGAGAGAACTGGATCAGAATTATGC	0	0	0	0	0	0	0	0	0	0	0	0	0	0	0	0	0	0	0	0	0	0	0	0	0	0	0	0	0	0	0	0	0	0	0	0	0	0	0	0	0	0	0	0	0	0
426	NODE_2182855_length_124_cov_2.66667_g2165441_i0	124	CGCGGCGTCAGAGCTTTGTTTAACATATTCTGTAGCATGGGCTGACTAGACCCAACTACCTTAGGCCCGATCTTGGGCTGTTGGCGCTTGCCTTTAACAGGCGATTTGCGTTTGATGACTTTCT	0	0	0	0	0	0	0	0	0	0	0	0	0	0	0	0	0	0	0	0	0	0	0	0	0	0	0	0	0	0	0	0	0	0	0	0	0	0	0	0	0	0	0	0	0	0
427	NODE_2182925_length_124_cov_2.66667_g2165511_i0	124	ATCGTGACAGCCGAGTACGTTAAATTGAAGGTTACCATAGAGGATTCCTAAGTAAGTTGGGAGACGGCAAACTTCCTTCCGAATTTGGGGTGACCACACTCCAAGACTAAATACCAAACAAGAG	0	0	0	0	1.25016	0	0	0	0	0	0	0	0	0	0	0	0	0	0	0	0	0	0	0	0	0	0	0	0	0	0	0	0	0	0	0	0	0	0	0	0	0	0	0	0	0
428	NODE_2182995_length_124_cov_2.66667_g2165581_i0	124	CTGACGGGCCTGTCCGTGGGGGCTCCAGGTGGCCCCAGGACTAAGTGACAACAGGACTGTGGCATGCAGCCCAAGGCGGAGACCCCAGGGAAGGCAGAAAGTGTGGCCTCAGGCCAGACCCAGG	0	0	1.37882	0	0	0	0	0	0	0	0	0	0	0	0	0	0	0	0	0	0	0	0	0	0	0	0	0	0	0	0	0	0	0	0	0	0	0	0	0	0	0	0	0	0	0
429	NODE_2183005_length_124_cov_2.66667_g2165591_i0	124	CTTGCTTTCATTTCTATTTCTCAACTTGTCACTTAATTCAGCAGTCTCTATGTTGAACCATCCCTTTTTGTTTAGTCTTATATCATAGTTCAAGTTCAACATATAGCCTTGTAAAGAGTTTATC	0	0	0	0	0	0	0	0	0	0	0	0	0	0	0	0	0	0	0	0	0	0	0	0	0	0	0	0	0	0	0	0	0	0	0	0	0	0	0	0	0	0	0	0	0	0
430	NODE_2183056_length_124_cov_2.66667_g2165642_i0	124	GAAGCCCTTCTGACATGAACAAATATTTTGCGATCTGCCCGCGCGGGCTGGAAGAACTGCTGCTCGAAGAACTGCGCGGCGTCGGCGGCGAAGAGTTGCGGTCGACGCCCGGCGGCGTGTTTTT	0	0	0	0	0	0	0	0	0	0	0	0	0	0	0	0	0	0	0	0	0	0	0	0	0	0	0	0	0	0	0	0	0	0	0	0	0	0	0	0	0	0	0	0	0	0
431	NODE_2183136_length_124_cov_2.66667_g2165722_i0	124	CGCTACTCATACCAACAGTATCACTAGTGCCAACTCCAGCATTCTTTTCAGTATGCCTTCAACGCATAGCACTACGCTCCCCTACCCCTTAATTATCCGAAGATAATTAAAGCCATGAATTCGG	0	0	0	0	0	0	0	0	0	0	0	0	0	0	0	0	0	0	0	0	0	0	0	0	0	0	0	0	0	0	0	0	0	0	0	0	0	0	0	0	0	1.24576	0	0	0	0
432	NODE_2183168_length_124_cov_2.66667_g2165754_i0	124	GGTGGTAGTGAAGATGGCTCTGGTTTAGATTCGAGTTTGCCTATAGCTGATTTCGATTCTAATTTAAAAAAGGCTAATGAGGGTTTTCTTGATTTCTATAATAAATATATAGGCAAATTTAATG	0	0	0	0	0	0	0	0	0	0	0	0	0	0	0	0	0	0	0	0	0	0	0	0	0	0	0	0	0	0	0	0	0	0	0	0	0	0	0	0	0	0	0	0	0	0
433	NODE_2183279_length_124_cov_2.65217_g2165865_i0	124	GAAGGACTGACCGCTTGTCCCGATCGAAACTAATAGCGATTAGCTCAGATTAAGCCTGTTAGGCCGGCGTTTTGTGAGCGAAACTCAAAAGACCTGACTAAGTATGTAGGACTCGTTATATAGG	0	0	0	0	0	0	0	0	0	0	0	0	0	0	0	0	0	0	0	0	0	0	0	0	0	0	0	0	0	0	0	0	0	0	0	0	0	0	0	0	0	0	0	0	0	0
434	NODE_2183291_length_124_cov_2.65217_g2165877_i0	124	CTTGCAGATTTTAAGTTATATGACGCGGTTTCTGAGGATTCATCTGCTTTTGTTGTTTCGATTGTGTTTCTGCTATGTGATGATTTAACTGGTGATTCTAAGGATGCAGAGACTGAATTTGTGC	0	0	0	0	0	0	0	0	0	0	0	0	0	0	0	0	0	0	0	0	0	0	0	0	0	0	0	0	0	0	0	0	0	0	0	0	0	0	0	0	0	0	0	0	0	0
435	NODE_2183343_length_124_cov_2.65217_g2165929_i0	124	GTCTTGCTCTGTGAGCTGGGCTGGAGTGCAGTGGCACAATTCACAGCTCGCTGCGGCCTCAACCTCTCGGGCTCGGGGGATTCTTCCGCCTCGGCCTCCCGGGTTGCTGGAATTGCAGACGCAC	0	0	0	0	0	0	0	0	0	0	0	0	0	0	0	0	0	0	0	0	0	0	0	0	0	0	0	0	0	0	0	0	0	0	0	0	0	0	0	0	0	0	0	0	0	0
436	NODE_2187232_length_124_cov_2.42029_g2169818_i0	124	TGGAAAAGAGAAAGGGCGTGCAGATCAGGTGAGACCAAAACCTCACGCTGCTAGGGTAACACGCGAAACAAAAGGGCGAGAAATCAAGCAACAAGAGAGAAGGCGCAGAAGATGAACCAAGAGA	0	0	0	0	0	0	0	0	0	0	0	0	0	0	0	0	0	0	0	0	0	0	0	0	0	0	0	0	0	0	0	0	0	0	0	0	0	0	0	0	0	0	0	0	0	0
437	NODE_2188335_length_124_cov_2.37681_g2170921_i0	124	GTCGCCGCGGCACCCTGATCCTTTCGGGGTACGGGTTCCCGGCCCTCCGCTCACGCACGCTCGACGGCGACCGCGCCGTCAGGCAGTGCGACGCCCCATCGTGCACGGTGGGTGCACCATGGAG	0	0	0	0	0	0	0	0	0	0	0	0	0	0	0	0	0	0	0	0	0	0	0.740263	0	0	0	0	0	0	0	0	0	0	0	0	0	0	0	0	0	0	0	0	0	0	0
438	NODE_2191004_length_124_cov_2.02899_g2173590_i0	124	ATCTATTCACCCATCGGCTGTTTACTCATTTTGCCTCTCTGAGACAGGTCTCTTGCCCTCGCGGGGTACAGCAGGTCTGCAAGCATGCAGCTGGGGGATGCTTTGGTAGATGGTATGATGGGTG	0	0	0	0	0	0	0	0	0	0	0	0	0	0	0	0	0	0	0	0	0	0	0	0	0	0	0	0	0	0	0	0	0	0	0	0	0	0	0	0	0	0	0	0	0	0
439	NODE_2191120_length_124_cov_2_g2173706_i0	124	GCCGGCCACTACCGAGAAGCCGAATTCCTCAAATCGCCCCCGCAGGCGGCGGCCCAAGCGCTGGAGATCGCTGCGCAGGTCGGGGCCTTCTGGCTCGCCTAGGGTAAGGCTCGCGGTGTCCATG	0	0	0	0	0	0	0	0	0	0	0	0	0	0	0	0	0	0	0	0	0	0	0	0	0	0	0	0	0	0	0	0	0	0	0	0	0	0	0	0	0	0	0	0	0	0
440	NODE_2191247_length_124_cov_2_g2173833_i0	124	CGACCTATTTCATCCAGATCCTGCAGGGCCTGCTGGTCACCCTCGGCGTTTCGCTGGGCGCTCTGCTGGTGGCTGCCGCGCTTGGCCTGGCCGGCGCGGCGGCCAAACTGTCTCCCTACCGCTG	0	0	0	0	0	0	0	0	0	0	0	0	0	0	0	0	0	0	0	0	0	0	0	0	0	0	0	0	0	0	0	0	0	0	0	0	0	0	0	0	0	0	0	0	0	0
441	NODE_2198003_length_123_cov_4.66176_g2180589_i0	123	GCTCTTCCGATCTAGGTTAGGCAACCGGTTTACAATCAGCCGGGCCAGGCGCCCGCTGAGACCCGTTTAGTATTTCGCAGAATACTAAACACCCTGCGAGGGTTTTATTTCCAGAAACCGCAT	0	0	0	0	0	0	0	0	0	0	0	0	0	0	0	0	0	0	0	0	0	0	0	0	0	0	0	0	0	0	0	0	0	0	0	0	0	0	0	0	0	0	0	0	0	0
442	NODE_2198277_length_123_cov_4.57353_g2180863_i0	123	GGCTCCTTCTGCATCGCTTACCGACGCGGCTCCGGAATCGGAAGGCGGCGCGACGACGCGCGGGTCCGGGCGTGAAAGTGGGGAACTTGTCCCCTGCCCTGGAAGCCTTCTCGAAGGTTCCGG	0	0	0	0	0	0	0	0	0	0	0	0	0	0	0	0	0	0	0	0	0	0	0	0	0	0	0	0	0	0	0	0	0	0	0	0	0	0	0	0	0	0	0	1.4473	0	0
443	NODE_2199903_length_123_cov_4.04412_g2182489_i0	123	GTAGAAACGTGGTCGCCAGGCCAAAACGAAGCTAAAACTGCTAAACCGAACGGCCGAATGTCGGGTTTGGGATAAAAACGTGAAACGGAAAAACAGGCAACAACCCGACTAGATGGAACTGGT	0	0	0	0	0	0	0	0	0	0	0	0	0	0	0	0	0	0	0	0	0	0	0	0	0	0	0	0	0	0	0	0	0	0	0	0	0	0	0	0	0	0	0	0	0	0
444	NODE_2199919_length_123_cov_4.04412_g2182505_i0	123	GTTGATCTTTCTGCGGTGCCTTTCGACATGGGCTACACTCTTGTTCACGAATTGGGCCACTTTTTTGGTTTGTTCCATACCTTCGGTACTGGCGAGGGATCATGCCTTGACACTGACTCGGCC	0	0	0	0	0	0	0	0.645453	0	0	0	0	0	0	0	0	0	0	0	0	0	0	0	0	0	0	0	0	0	0	0	0	0	0	0	0	0	0	0	0	0	0	0	0	0	0
445	NODE_2204166_length_123_cov_3.47059_g2186752_i0	123	ATTTTGTCTAAAGAAAATCACAAACAAGTAAACAGCGACATTTAACGGACTTTACTGCTCGTTCTACAGTCGCTGAAGTTGGTGGATGTCAGCTGTAACTTCTTGGTGTCTTTGAGAAATAGG	0	0	0	0	0	0	0	0	0	0	0	0	0	0	0	0	0	0	0	0	0	0	0	0	0	0	0	0	0	0	0	0	0	0	0	0	2.71695	0	0	0	0	0	0	0	0	0
446	NODE_2205961_length_123_cov_3.16176_g2188547_i0	123	GGCAGCATGTACCTAGAGGCCACTTTCAATAATCCAAACTGACAGTCTATGTCCCCAGAGTTCCTAGGCAGCTTACATTTAATGCGACCACCAACATGGCTGAGTTCAAATCTGCCATCTTAC	0	0	0	0	0	0	0	0	0	0	0	0	0	0	0	0	0	0	0	0	0	0	0	0	0	0	0	0	0	0	0	0	0	0	0	0	0	0	0	0	0	0	0	0	0	0
447	NODE_2206900_length_123_cov_3_g2189486_i0	123	GTTATCTTTGGCTGCCTTTTCCTCTCATCCCGGGGGAAATTTTGCCCCGAAAAAACTTCTTGCGCTTCATATCAATTCAAGGGGGCAAAATTTTCTCTCGCGCCTCCAGCTGAAGGAAACCGC	0	0	0	0	0	0	0	0	0	0	0	0	0	0	0	0	0	0	0	0	0	0	0	0	0	0	0	0	0	0	0	0	0	0	0	0	0	0	0	0	0	0	0	0	0	0
448	NODE_2208039_length_123_cov_2.70588_g2190625_i0	123	CCGAAGTAACAGTAGAAGCAGGGGGCCCGATAGTTACTCGGGTCCTGCTCATTGTACTGGGAGTGTAGGAAAGATGGTTATTTTCGCGGTGTCTAGCTGTCATGAGATGGTGCCTCGTGTTAA	0	0	0	0	0	0	0	0	0	0	0	0	0	0	0	0	0	0	0	0	0	0	0	0	0	0	0	0	0	0	0	0	0	0	0	0	0	0	0	0	0	1.24576	0	0	0	0
449	NODE_2208052_length_123_cov_2.70588_g2190638_i0	123	CCCAACCTAATCTAACTCGCGTTAGCAATCTTCAACCTCAGTGAAAATGGACCTAGGGGCCCACTCATCACTGAACCCAGCAACAGCCATCTCGTCATAGTATTTCTCCAAGCAGACTTGTTC	0	0	0	0	0	0	0	0	0	0	0	0	0	0	0	0	0	0	0	0	0	0	0	0	0	0	0.812844	0	0	0	0	0	0	0	0	0	0	0	0	0	0	0	0	0	0	0
450	NODE_2208096_length_123_cov_2.70588_g2190682_i0	123	GTCGTCTGCAAGGGATTCGGCTCTGGTGTATGTCGTGAAATTGCAATGCGTGGGCAAGCCGGGACGGCGCTATAGGCCACCCCCGCCGGCGCCCACCTGCTATGGTTCTCAGCCGGGCCCGAG	0	0	0	0	0	0	0	0	0	0	0	0	0	0	0	0	0	0	0	0	0	0	0	0	0	0	0	0	0	0	0	0	0	0	0	0	0	0	0	0	0	0	0	0	0	0
451	NODE_2208207_length_123_cov_2.70588_g2190793_i0	123	GAATTATTGACAGAAAACAAGAGAATAATGAAAGATTATGGGACGAACAGGAGCAACAGCAAGGTCGTAGCAGAAAGCACAAAACCAACAACAAAATGAAGAAAACAAAGAAGAAGATGTATG	0	0	0	0	0	0	0	0	0	0	0	0	0	0	0	0	0	0	0	0	0	0	0	0	0	0	0	0	0	0	0	0	0	0	0	0	0	0	0.663107	0	0	0	0	0	0	0
452	NODE_2208301_length_123_cov_2.70588_g2190887_i0	123	GTTTATCGTACATAAAGTGTAAAGTGTATGCAGATCGTGAAATCTTAAATTCACTGAGAAAAATAACAATCACTTCCATGGATAATAGTAAAATTAAAATAAGGTGAATGGTAATGCTTTTTC	0	0	0	0	0	0	0	0	0	0	0	0	0	0	0	0	0	0	0	0	0	0	0	0	0	0	0	0	0	0	0	0	0	0	0	0	0	0	0	0	0	0	0	0	0	0
453	NODE_2208391_length_123_cov_2.70588_g2190977_i0	123	CTGGTTTTCCACCAGGAGCGCCTGCTGGAGGCGGACTGCTTGATTGCAGGGCATTTAAGTCGAAGGCAACCGACCGGGTCACTCCCGATGCAAAATGTGCAAAGTCCTAAGGGCAAAACTGAC	0	0	0	0	0	0	0	0	0	0	0	0	0	0	1.50617	0	0	0	0	0	0	0	0	0	0	0	0	0	0	0	0	0	0	0	0	0	0	0	0	0	0	0	0	0	0	0
454	NODE_2208412_length_123_cov_2.70588_g2190998_i0	123	AATCAGTCACGGTGTCGTCTGTAGGGGAGATGGGTTGAGCTTGGAAAATGGTGCGTCGCTTAGAACCTCGCATACCATCCTTGCCATCTTCTCCGACTTCGGGAACCCTATGGTGATATGGGC	0	0	0	0	0	0	0	0	0	0	0	0	0	0	0	0	0	0	0	0	0	0	0	0	0	0	0	0	0	0	0	0	0	0	0	0	0	0	0	0	0	0	0	0	0	0
455	NODE_2208558_length_123_cov_2.69118_g2191144_i0	123	TTTAAATATATGTGGTAATATTTAGATATATAAGTTAATCATAATTAAAAGTATACTTTTAATTTTATAATGTACAATTTTAAGTCTTCTAGTAGCCACATATGGCTCACATTTACCTATCAG	0	0	0	0	0	0	0	0	0	0	0	0	0	0	0	0	0	0	0	0	0	0	0	0	0	0	0	0	0	0	0	0	0	0	0	0	0	0	0	0	0	0	0	0	0	0
456	NODE_2215730_length_123_cov_2.23529_g2198316_i0	123	CAATAGTCATTTTTGCTAACCGCCTTTTTACTTTCTTTTTGCAATAATTTGATAACTTTTGTCTCTATTCCACTTCATTCTTTCTAATCAATTTGGATTTTGGATTTTTGTAGGCTTTTTGAT	0	0	0	0	0	0	0	0	0	0	0	0	0	0	0	0	0	0	0	0	0	0	0	0	1.42282	0	0	0	0	0	0	0	0	0	0	0	0	0	0	0	0	0	0	0	0	0
457	NODE_2215946_length_123_cov_2.19118_g2198532_i0	123	GACTAAACTGACCGTCCTGAGTGAGTCTCTTCTGCTCTCTCCTGAGCGCCTGCCTTGCCTCAGCCGGTCCTTACATCTAGGCAACTCTCATCAAAGGGGCGGGGGACGACTTGAAGTGGCCTG	0	0	0	0	0	0	0	0	0	0	0	0	0	0	0	0	0	0	0	0	0	0	0	0	0	0	0	0	0	0	0	0	0	0	0	0	0	0	0	0	0	0	0	0	0	0
458	NODE_2216817_length_123_cov_2.02941_g2199403_i0	123	GTGACATTCGGTGGGCGGCTGGGGACGCGATGAAGGGCATCAATCATAGCGAGTGGTCCAAGTAACCTTCTCAACAGTACTTTGCTGCCCATGCTCGTGCATGTACTGACACCTGGGAATGGG	0	0	0	0	0	0	0	0	0	0	0	0	0	0	0	0	0	0	0	0	0	0	0	0	0	0	0	0	0	0	0	0	0	0	0	0	0	0	0	0	0	0	0	0	0	0
459	NODE_2218224_length_122_cov_9.32836_g2200810_i0	122	CTCGACTTCGGTCTTGAGAGATCGCTGGCACGGCGAAGGGTGGGGCAACTCATCCATGCCTCGGCGAACCGGTGACGGTAGCTGTAGTTTGATCGGGCTTGCTCGATCTAACCGTGCAGATC	0	0	0	0	0	0	0	0	0	0	0	0	0	0	0	0	0	0	0	0	0	0	0	0	0	0	0	0	0	0	0	0	0	0	0	0	0	0	0	0	0	0	0	0	0	0
460	NODE_2221461_length_122_cov_5.49254_g2204047_i0	122	TTCCAGTCAGTACAATCCGAAGAAATGTGCGATGGACTCGTCTGATTTTACTGCAGGTTGTTTACCAGATCCAAGCAGAAGCTCCTACGGTCGGCAATTTTGCTTCGGAACGTCTATCCGAC	0	0	0	0	0	0	0	0	0	0	0	0	0	0	0	0	0	0	0	0	0	0	0	0	0	0	0	0	0	0	0	0	0	0	0	0	0	0	0	0	0	0	0	0	0	0
461	NODE_2223388_length_122_cov_4.80597_g2205974_i0	122	GTTCGGCTATCTCTATATATAGAGGACTCCTTGGGTTATAATAATTATTAAGCAATGAAGCAATCTCACATTGCTTTCTCTATTCTTTCACTCCCTTCTCCTAGCTGACCGCTACACTAACC	0	0	0	0	0	0	0	0	0	0	0	0	0	0	0	0	0	0	0	0	0	0	0	0	0	0	0	0	0	0	0	0	0	0	0	0	0	0	0	0	0	0	0	0	0	0
462	NODE_2225556_length_122_cov_4.10448_g2208142_i0	122	CTTAAAATCGATCCAGAACAAACTACTTTATTCCTTCAAATCAAAGATTTTAACGTCCTCCTACTTATCACTTCATAATTTTTGAAATGATAGTAAAGTATCGGTATTACGCTTTAGCGCCA	0	0	0	0	0	0	0	0	0	0	0	0	0	0	0	0	0	0	0	0	0	0	0	0	0	0	0	0	0	0	0	0	0	0	0	0	0	0	0	0	0	0	0	0	0	0
463	NODE_2225688_length_122_cov_4.07463_g2208274_i0	122	CTCCCACTGTCCTCCCGACCGTGTCACTTGCTCCCACCAGAACTCCCACGGTGATTCCTACTGTGTCGCCGACTACGAGGACGCCGACCGCTCTCCCGACTGTATCGGCTGCTCCCACCACC	0	0	0	0	0	0	0	0	0	0	0	0	0	0	0	0	0	0	0	0	0	0	0	0	0	0	0	0	0	0	0	0	0	0	0	0	0	0	0	0	0	0	0	0	0	0
464	NODE_2225916_length_122_cov_4.01493_g2208502_i0	122	GTCAAAGAGATTCGCGCAACGATCGATGAATGGACCGGCCAACGCGAACTTGTGACGATCGCTCGCCGCCGTGTGGAAGTCGAAACCGAGCGAGTTCGCGATCTGCGTTCGTCAAAAATCGG	0	0	0	0	0	0	0	0	0	0	0	0	0	0	0	0	0	0	0	0	0	0	0	0	0	0	2.43187	0	0	0	0	0	0	0	0	0	0	0	0	0	0	0	0	0	0	0
465	NODE_2230784_length_122_cov_3.34328_g2213370_i0	122	GCTGAATGGGTCGCTCCTTCCTCTTCCGCCGCTGAATCTTCGTCGTCTCCTTACGTCGCGGCCGCCGCCGTCGAGACCTCGTCTTACGTCGAGCCTACCACTTCTACCTGGGTCGCTCCTAC	0	0	0	0	0	0	0	0	0	0	0	0	0	0	0	0	0	0	0	0	0	0	0	0	0	0	0	0	0	0	0	0	0	0	0	0	0	0	0	0	0	0	0	0	0	0
466	NODE_2233742_length_122_cov_2.74627_g2216328_i0	122	TCGGTGGGTGGACTTCTGGGGGTGGCGGAGGGGGATTTTCTAATGAATTAGAGAGTTGTGGTTGTTTGGTTTTCTCATGTCAGTAAGTCTCTGTAATAGGTAGGTATGGTCTTGTAGTGGGG	0	0	0	0	0	0	0	0	0	0	0	0	0	0	0	0	0	0	0	0	0	0	0	0	0	0	0	0	0	0	0	0	0	0	0	0	0	0	0	0	0	0	0	0	0	0
467	NODE_2233805_length_122_cov_2.74627_g2216391_i0	122	GCTACTATCCAAGCATACGCCCGCAGCCCACCGGTGTTTCACCGTCTATGCTCGCCCGCTCCAGGGCAGCTTGGCCGCTAGCAATGCACACCCACAACTCCTTTCGGATTCAGGCCTGGCTC	0	0	0	0	0	0	0	0	0	0	0	0	0	0	0	0	0	0	0	0	0	0	0	0	0	0	0	0	0	0	0	0	0	0	0	0	0	0	0	0	0	0	0	0	0	0
468	NODE_2233863_length_122_cov_2.74627_g2216449_i0	122	GTGCTGACGAACTACGGCGTGTTGGGCGACGATATCGACGCCGCCCGGGCCGAGTCTGCGCGTGAGCGCGCATCGGTGCTGATCTCTGAGCGCAAGTCCGACACGGACATGGCGCTGGCGCG	0	0	0	0	0	0	0	0	0	0	0	0	0	0	0	0	0	0	0	0	0	0	0	0	0	0	0	0	0	0	0	0	0	1.17603	0	0	0	0	0	0	0	0	0	0	0	0
469	NODE_2234001_length_122_cov_2.74627_g2216587_i0	122	ACCGCCGGTCGAACCAAACTGGATCGAAATCCCGGTCTCGCCGCCGCGCGAGATCGGTCGAGAGACCAGCTGGCAGTGGGAGCATGACCGCTCCTTCAGCCGCTGGTTATTCAGTTAAACGG	0	0	0	0	0	0	0	0	0	0	0	0	0	0	0	0	0	0	0	0	0	0	0	0	0	0	1.62569	0	0	0	0	0	0	0	0	0	0	0	0	0	0	0	0	0	0	0
470	NODE_2234191_length_122_cov_2.74627_g2216777_i0	122	CTCGGGAACGCGGAAGTGAAACCGGGACTCGTCGTCGCTTTAGGAGACCGACTGGGGACCGAGGACGGGAGAGAGGAAGTTAACGCACTCGGGATAGTGGACGGCAGAGAGGAAGATAACAC	0	0	0	0	0	0	0	0	0	0	0	0	0	0	0	0	0	0	0	0	0	0	0	0	0	0	0	0	0	0	0	0	0	0	0	0	0	0	0	0	0	0	0	0	0	0
471	NODE_2234298_length_122_cov_2.73134_g2216884_i0	122	GAGCGTTCTTGCGCGGAAAATACTCGGGCATCAAGATAAATACCGAAGCTTTGGATTCAGTAGAAGACTACTGAGTGGTAGGGGAGCATTCTGATACTGACGAAGTTTTACTGTGAGGTAAG	0	0	0	0	0	0	0	0	0	0	0	0	0	0	0	0	0	0	0	0	0	0	0	0	0	0	0	0	0	0	0	0	0	0	0	0	0	0	0	0	0	0	0	0	0	0
472	NODE_2235735_length_122_cov_2.62687_g2218321_i0	122	CTCCGACTAAAGAGTATGTAAAGCCGCACCGAAAGGAACTCTCGAACGCGCGGAGAAAGTCGTTCTTGCGCACCGTTTCCCCGATACCGTGACACCATTGATTTATAGGCAAGACACGTCGT	0	0	0	0	0	0	0	0	0	0	0	0	0	0	0	0	0	0	0	0	0	0	0	0	0	0	0	0	0	0	0	0	0	0	0	0	0	0	0	0	0	0	0	0	0	0
473	NODE_2241615_length_122_cov_2.25373_g2224201_i0	122	GTGGTGGCCGCGGTGACCAGACAGGCTCGACCGGCCCATCGCCAAGCTCGCCAACGAGCCCAGGTGGTGAGCGTGGAGACGTGACGAACTCGACCGGCCCATCGCCAAGCTCGCCAACGAGC	0	0	0	0	0	0	0	0	0	0	0	0	0	0	0	0	0	0	0	0	0	0	0	0	0	0	0	0	1.32638	0	0	0	0	0	0	0	0	0	0	0	0	0	0	0	0	0
474	NODE_2243017_length_122_cov_2.02985_g2225603_i0	122	TGCCTAGGCGTTGCAGAGCAGTGCCTCTCAAAGCACTGATGTGCACACCAATCATCAGGGAGCCCGCCAGAACTCAAAATCTGACCCAGCGGGTCTGGAGTGGGGTCCGAGATTCAACAAGC	0	0	0	0	0	0	0	0	0	0	0	0	0	0	0	0	0	0	0	0	0	0	0	0	0	0	0	0	0	0	0	0	0	0	0	0	0	0	0	0	0	0	0	0	0	0
475	NODE_2248285_length_121_cov_5.25758_g2230871_i0	121	CGCCGGGCCAATCTGCGCGGCCAGCGCCGCCTGCTGCGCGGGGTTGTTCACGGCGGCCCGCTGCGAAGCGCTCAGCAGCAGCGAGGGCAACGCTTGCCCTGTGGACGAGCGAACCTGGCCG	0	0	0	0	0	0	0	0	0	0	0	0	0	0	0	0	0	0	0	0	0	0	0	0	0	0	0	0	0	0	0	0	0	0	0	0	0	0	0	0	0	0	0	0	0	0
476	NODE_2251127_length_121_cov_4.39394_g2233713_i0	121	CCGATCTGAATAATACAGGTTTAAGAGATTTTTCTAATCTTGAAAAAATAATTTTATATAATTATAATGTAACAATAATGAAATAAAGCAGAACAGGCGACCGCGGCCTAATTTATTAGGG	0	0	0	0	0	0	0	0	0	0	0	0	0	0	0	0	0	0	0	0	0	0	0	0	0	0	0	0	0	0	0	0	0	0	0	0	0	0	0	0	0	0	0	0	0	0
477	NODE_2251573_length_121_cov_4.21212_g2234159_i0	121	AGAAGATCGCCTTCGCCGCCCTCGTCGTCGCCGCCTCGGCCACCGCCGTCGTGGCCAACGAGGCACCTGCCACCAGCGAGGCCTCCGGCGTCGCAGTCGCCCCCGTCGCCCTCGTCGCCCC	0	0	0	0	0	0	0	0	0	0	0	0	0	0	0	0	0	0	0	0	0	0	0	0	0	0	0	0	0	0	0	0	0	0	0	0	0	0	0	0	0	0	0	0	0	0
478	NODE_2251640_length_121_cov_4.18182_g2234226_i0	121	CTTGGTAATAGAGAGACATCTTCTCGCAACATGTCAAAAATGATGATATGAATTTCCGTGGGAAGCTGGGTCAAAAACATCTTATAGATAGGGCTAGCTTTCCAGCTGCAGACAAACCAGA	0	0	0	0	0	0	0	0	0	0	0	1.37207	0	0	0	0	0	0	0	0	0	0	0	0	0	0	0	0	0	0	0	0	0	0	0	0	0	0	0	0	0	0	0	0	0	0
479	NODE_2251677_length_121_cov_4.18182_g2234263_i0	121	CTGGAGCATGTTGGAAGAATTTTATCTATGATATTCATACAACAACTATTATATATTTATGCCACTAATGTCACCTCTCAGAAACGAGATGGGAGAAAAAGTCTTGTGTTGAAGTTTTTTG	0	0	0	0	0	0	0	0	0	0	0	0	0	0	0	0	0	0	0	0	0	0	0	0	0	0	0	0	0	0	0	0	0	0	0	0	0	0	0	0	0	0	0	0	0	0
480	NODE_2256318_length_121_cov_3.51515_g2238904_i0	121	AACGGGCATCAAGCCTTGTGCCGAAGCGATGGAAGTAGAAATACTTGGTAGGGGAGCATTCTCATGGCAGAGAAGGTGTGCCGGCAAGGCATGCTGGAGCGATGAGAAAAGCAAATGTAGG	0	0	0	0	0	0	0	0	0	0	0	0	0	0	0	0	0	0	0	0	0	0	0	0	0	0	0	0	0	0	0	0	0	0	0	0	0	0	0	0	0	0	0	0	0	0
481	NODE_2259921_length_121_cov_2.78788_g2242507_i0	121	GCGGTATAATGACTTCTTCACTAATTAACAAATTTCCAAAGTCAACGATGTACAGGTTTGTAAGCCTGGACTACCATTAAAGAGAGAAGAAATCTACTCCGTCTTCATATTGAGACCACTT	0	0	0	0	0	0	0	0	0	0	0	0	0	0	0	0	0	0	0	0	0	0	0	0	0	0	0	0	0	0	0	0	0	0	0	0	0	0	0	0	0	0	0	0	0	0
482	NODE_2260020_length_121_cov_2.78788_g2242606_i0	121	CCGAGAAAGCGCTTTACGCATTTACATGAACATATCAGGAAACATAGACCTGTACCCATTTGTGTCCTGGGAAAAGAATGGTGCTTGCAAAAAACAACACTAAGTTACATTAGGACTCAGC	0	0	0	0	0	0	0	0	0	0	0	0	0	0	0	0	0	0	0	0	0	0	0	0	0	0	0	0	0	0	0	0	0	0	0	0	0	0	0	0	0	0	0	0	0	0
483	NODE_2260073_length_121_cov_2.78788_g2242659_i0	121	CATCAGTAGTGCGTAGTGTATCGACAAGTGAGCGCGCGTGTGGCCACCCTCTGGGATCAGCGTGGGCTTCACCGGTACAAGAGCGCCAGGCACGCACGAACATCCGACTGACGTGCAAGGG	0	0	0	0	0	0	0	0	0	0	0	0	0	0	0	0	0	0	0	0	0	0	0	0	0	0	0	0	0	0	0	0	0	0	0	0	0	0	0	0	0	0	0	0	0	0
484	NODE_2260129_length_121_cov_2.78788_g2242715_i0	121	GTCAAGCCGGCGGCCGGCCACCACGGCGTGCACGGGCACGGCAAGCCGAGCTCCCCGCCGTCCCCGTCCGCGGCGCCGACCACGAGCCGGCTGGGCGCGGGCGCTGGTACGCGGATGGGCG	0	0	0	0	0	0	0	0	0	0	0	0	0	0	0	0	0	0	0	0	0	0	0	0	0	0	0	0	0	0	0	0	0	0	0	0	0	0	0	0	0	0	0	0	0	0
485	NODE_2260236_length_121_cov_2.78788_g2242822_i0	121	CAACGGTTTCCCGGCGTGGCTACTCCCCCCAATCAGGACCCGCGGTAAGCAACTGCGGCCAAGGCCAGCAATGAGTCAGGCCTTCGCCTCACCGGTCGCGGCGCCGGAAGGTGACGACCAG	0	0	0	0	0	0	0	0	0	0	0	0	0	0	0	0	0	0	0	0	0	0	0	0	0	0	0	0	0	0	0	0	0	0	0	0	0	0	0	0	0	0	0	0	0	0
486	NODE_2260239_length_121_cov_2.78788_g2242825_i0	121	GCAGTAGTCAGAGTGCTTGCAGACAGGTCGTTGTCACCTGAAGATCCAGCTTGTGTAAGAGCTGTGGTAACTGCTAGACCTGAAGCGTTAGTTACTTCAAACTTCAGCTGGCCGTAGCTTG	0	0	0	0	0	0	0	0	0	0	0	0	0	0	0	0	0	0	0	0	0	0	0	0	0	0	0	0	0	0	0	0	0	0	0	0	0	0	0	0	0	0	0	0	0	0
487	NODE_2260361_length_121_cov_2.78788_g2242947_i0	121	GGGAAAGGAAATTTCACTCAAGAGAAGTAAAGAGCAAGAGGAGAATATGATAGTCGTGCAGAAAATATAGAAGGTGGTCAGAAGATCAGAAGAAAAAATATTGTGACAATTTTGATCGTGG	0	0	0	0	0	0	0	0	0	0	0	0	0	0	0	0	0	0	0	0	0	0	0	0	0	0	0	0	0	0	0	0	0	0	0	0	0	0	0	0	0	0	0	0	0	0
488	NODE_2260412_length_121_cov_2.77273_g2242998_i0	121	AGCCTTTGGACGACCAATTTTTGGCGACTCCGAAGACGAGGAAGATGAGGAGCACAGGTATGTGTGTTTTTGAGTATGATATGAGAATTTTTGTGCTGTCACATATTTGTGCTGACCGTCC	0	0	0	0	0	0	0	0	0	0	0	0	0	0	0	0	0	0	0	0	0	0	0	0	0	0	0	0	0	0	0	0	0	0	0	0	0	0	0	0	0	0	0	0	0	0
489	NODE_2260692_length_121_cov_2.75758_g2243278_i0	121	ATTTTTTATGGTGACATTAAATTTGTACTTTCAGATTGACAATTGAAATATTAGAAAGAGTTCTCTTTTCTTTTTAAAAGGGTGAAGTGGCCGAACTCGTGTCGGCCACGTGAACGTTTGG	0	0	0	0	0	0	0	0	0	0	0	0	0	0	0	0	0	0	0	0	0	0	0	0	0	0	0	0	0	0	0	0	0	0	0	0	0	0	0	0	0	0	0	0	0	0
490	NODE_2260723_length_121_cov_2.75758_g2243309_i0	121	GTCTTGCACGTCTTTAAACTTTTATCTCTGCTCCTTTTTTCTTCCTTCTCTTTTGGATTTTAAATTCTATTATATCATAGCTTTTTCTATTCTGTTCTTCCTATTTGTTCCTATCTTCCGC	0	0	0	0	0	0	0	0	0	0	0	0	0	0	0	0	0	0	0	0	0	0	0	0	0	0	0	0	0	0	0	0	0	0	0	0	0	0	0	0	0	0	0	0	0	0
491	NODE_2267765_length_121_cov_2.33333_g2250351_i0	121	GTCCATAATAGTTCTAAATCAGTTGTTTCGCGTGGGCGGTTCGACATCGCTGCCAAGCCACGGGCGGCGACGCAGGGCGTTGCGCAGCGGTCCCAAGCACGAGTTGCCCCGCACCCAGGTC	0	0	0	0	0	0	0	0	0	0	0	0	0	0	0	0	0	0	0	0	0	0	0	0	0	0	0	0	0	0	0	0	0	0	0	0	0	0	0	0	0	0	0	0	0	0
492	NODE_2268155_length_121_cov_2.25758_g2250741_i0	121	CACAAGTATAGTTAAAAGTACATGACTGCTGATAATTATAACTATAGTCCTCCATGTGTTGGCACGTCACGGCCTGAATAAACATATGCACTCATCCCGCCGATGTGGCGAGGCAACTGCA	0	0	0	0	0	0	0	0	0	0	0	0	0	0	0	0	0	0	0	0	0	0	0	0	0	0	0	0	0	0	0	0	0	0	0	0	0	0	0	0	0	0	0	0	0	0
493	NODE_2268229_length_121_cov_2.24242_g2250815_i0	121	GGTCCGGAGGACTGGTTGCTGAGAGAAGGCATGGGATCATGGAATCATCAGTGTTCAGGTGGGGCATCGGTGGTCTAGCACAGCTACTGATTTTGCTGTGGGGCATCGGAGCTGGAGAGGC	0	0	0	0	0	0	0	0	0	0	0	0	0	0	0	0	0	0	0	0	0	0	0	0	0	0	0	0	0	0	0	0	0	0	0	0	0	0	0	0	0	0	0	0	0	0
494	NODE_2269477_length_121_cov_2.06061_g2252063_i0	121	TGTATTTTTGTGCCCGAACTAACACACTGGAATAATTCATACATATTGCATATATATGGAGAATGTATCTGTTTTAACTTGCAGCTCATTTGTAAACGATCAGCCGGCTGACAAAAATACA	0	0	0	0	0	0	0	0	0	0	0	0	0	0	0	0	0	0	0	0	0	0	0	0	0	0	0	0	0	0	0	0	0	0	0	0	0	0	0	0	0	0	0	0	0	0
495	NODE_2270984_length_120_cov_13.5692_g2253570_i0	120	ATGCGCCGAAGGTAATCAGGTGACAATGATTTTAGCCTGGATCATTGTTTTTAGTTGCTTATTGTGCTGTGCCGCACAATCGGCCACCGTCTCACCGTTTGGTGTGCTCAGATCGGAAGA	0	0	0	0	0	0	0	0	0	0	0	0	0	0	0	0	0	0	0	0	0	0	0	0	0	0	0	0	0	0	0	0	0	0	0	0	0	0	0	0	0	0	0	0	0	0
496	NODE_2274385_length_120_cov_5.66154_g2256971_i0	120	GGCAGAGCTACTCGTTGTAACCAGCACACATATTATCATCAGTGATTTATAGCAGGAGTAGGGCTAGACCACCGTCGTTTAGTCTGAACCTGGGTACCTCATGTGTGTTACTCGTTCCCG	0	0	0	0	0	0	0	0	0	0	0	0	0	0	0	0	0	0	0	0	0	0	0	0	0	0	0	0	0	0	0	0	0	0	0	0	0	0	0	0	0	0	0	0	0	0
497	NODE_2278201_length_120_cov_4.24615_g2260787_i0	120	GCGTTGTCGGCCGCACCTCCCACGCGAATGGCTCCAACGAGACCTATCATCTCGGAAACGTCTGCTCCCGTCCTTGCTGTCGCCACGGCCAAGACAACCACCACAGCCACCAGCTCGGAT	0	0	0	0	0	0	0	0	0	0	0	0	0	0	0	0	0	0	0	0	0	0	0	0	0	0	0	0	0	0	0	0	0	0	0	0	0	0	0	0	0	0	0	0	0	0
498	NODE_2278206_length_120_cov_4.24615_g2260792_i0	120	GTCCCCCTCCCTTTGCGTTTCCTGAACCGGAACCGGCGGCTTGGGTTGGCTGTTTGTGGTGGTTCCTTCTTCGGCCCTGCGGCTTTTGCTGCTGCGGCGCGGGGGCGGTGCGGGCGTGCG	0	0	0	0	0	0	0	0	0	0	0	0	0	0	0	0	0	0	0	0	0	0	0	0	0	0	0	0	0	0	0	0	0	0	0	0	0	0	0	0	0	0	0	0	0	0
499	NODE_2278234_length_120_cov_4.24615_g2260820_i0	120	TAAGATTATTGTTGGGGACATATTTTAGTGCAATTGGCACCACCATGCCTTACTCTGATGGTGAATGATGAAGAGTGAATTTATTGTTAGGGTCATGAGTCTCCACTCAACATTTATTGC	0	0	0	0	0	0	0	0	0	0	0	0	0	0	0	0	0	0	0	0	0	0	0	0	0	0	0	0	0	0	0	0	0	0	0	0	0	0	0	0	0	0	0	0	0	0
500	NODE_2278450_length_120_cov_4.2_g2261036_i0	120	TCTGGCCGCGCACCCGGCGGTCCTGGCCTTGCAGCGCGAGCTGGAGCTGGCGCGCCGCGGCGCCGCCGTGGCCGCCAGAGAACGCAGGCCGAACTGGACCTGGGAGGTTTCCTACGGCCA	0	0	0	0	0	0	0	0	0	0	0	0	0.770224	0	0	0	0	0	0	0	0	0	0	0	0	0	0	0	0	0	0	0	0	0	0	0	0	0	0	0	0	0	0	0	0	0
501	NODE_2281025_length_120_cov_3.83077_g2263611_i0	120	GGCATTCGGCGTGCCGGAAAAGATAAGGAGGCCGCATGGCTGGCATGCGGCCTCCTTTGGGTGACGGCTGTTCAATGACACAACAGCAGGGGCAACGGCGCGTGGCCCAGGACATGGCGG	0	0	0	0	0	0	0	0	0	0	0	0	0	0	0	0	0	0	0	0	0	0	0	0	0	0	0	0	0	0	0	0	0	0	0	0	0	0	0	0	0	0	0	0	0	0
502	NODE_2285884_length_120_cov_3_g2268470_i0	120	CTTTCATCCATGTGAGGGCGCGGCGTTCCTCTCCTCTGGGGGATGTGGCAGCGGGGCTCCCCTTGGAGGCAGAGGGCGGCCCTCGCCGCACGCCTGGACCTGCCAGCACCTTTGTCGTGG	0	0	0	0	0	0	0	0	0	0	0	0	0	0	0	0	0	0	0	0	0	0	0	0	0	0	0	0	0	0	0	1.29631	0	0	0	0	0	0	0	0	0	0	0	0	0	0
503	NODE_2286443_length_120_cov_2.83077_g2269029_i0	120	TGGATAGATCGAGGAATAGGATAAAGGTTTACATTTGGAGGATATAGAAGTCGCATAGAGATTTGAGATCTAGATGGAACACAGTTAACGGATGCTTTGACGTGTGTAATGGAATGCGAT	0	0	0	0	0	0	0	0	0	0	0	0	0	0	0	0	0.650991	0	0	0	0	0	0	0	0	0	0	0	0	0	0	0	0	0	0	0	0	0	0	0	0	0	0	0	0	0
504	NODE_2286445_length_120_cov_2.83077_g2269031_i0	120	GTTCGTGCTAATCGTGTAGTAATCCTGGTAGTGTTTGTAATCGTGGTTGATAATCGTATCGAGGCGGTCGATCGCTGCAGTGTCGCTCGTCAGGAAGGTGTGCTCCAGGGCACGTTGCTC	0	0	0	0	0	0	0	0	0	0	0	0	0	0	0	0	0	0	0	1.56996	0	0	0	0	0	0	0	0	0	0	0	0	0	0	0	0	0	0	0	0	0	0	0	0	0	0
505	NODE_2286448_length_120_cov_2.83077_g2269034_i0	120	GCACGATGAGATTTGTCCTGTTTTTATACTTTTGGCACACAGAAGGTGTGGTCACCGACAGCAAAGCTGAAAAAACAGCTTGTCCATAATGATTCAGGAATTTTATCCGGCGACCTGCTG	0	0	0	0	0	0	0	0	0	0	0	0	0	0	0	0	0	0	0	0	0	0	0	0	0	0	0	0	0	0	0	0	0	0	0	0	0	0	0	0	0	0	0	0	0	0
506	NODE_2286547_length_120_cov_2.83077_g2269133_i0	120	CCCCTTTCTCAGCTAGGATTCAAACTGAACCACTCCAGCCCTTTGTACCGCCAGGTGAGAAGTGAAAAAACACTGCCTCCATTTTCTTATCTGCAAGTTTACAGCAGAGGAATGTGTCAT	0	0	0	0	0	0	0	0	0	0	0	0	0	0	0	0	0	0	0	0	0	0	0	0	0	0	0	0	0	0	0	0	0	0	0	0	0	1.50811	0	0	0	0	0	0	0	0
507	NODE_2286672_length_120_cov_2.83077_g2269258_i0	120	ATCTGCTCTCTTTTTATCATTTTCAATCCCTCACAATCACTCTCACTGCTTTGCAATCAAGTAAGTGTCGTTATTGTTTGCTTGACTTCTTTTGTTCAGCAGCACTAGACGCTGTTGAAG	0	0	0	0	0	0	0	0	0	0	0	0	0	0	0	0	0	0	0	0	0	0	0	0	0	0	0	0	0	0	0	0	0	0	0	0	0	0	0	0	0	1.24576	0	0	0	0
508	NODE_2286703_length_120_cov_2.83077_g2269289_i0	120	GCTTCTTCTGGCAGTGGAAAGGAGGATCAGAGGAAAGGTTGAGAAAATTGCGAAAGAGGAAGAGTCATTCATATTGATTAAGTAGGATGGATCATTGGAGGTGATAATAAAGTATATAAA	0	0	0	0	0	0	0	0	0	0	0	0	0	0	0	0	0	0	0	0	0	0	0	0	0	0	0	0	0	0	0	0	0	0	0	0	0	0	0	0	0	0	0	0	0	0
509	NODE_2286776_length_120_cov_2.83077_g2269362_i0	120	CTGGGAATGAAGTTTGTAAGATTCCTGGCATCCGACTAATAAAAATCCACTCAGAGGAAGACAAAGTAAACTACTCCGCAACAGTGCAGACTCAGTGGAAAAAAGTACTTACGATTGATC	0	0	0	0	0	0	0	0	0	0	0	0	0	0	0	0	0	0	0	0	0	0.767886	0	0	0	0	0	0	0	0	0	0	0	0	0	0	0	0	0	0	0	0	0	0	0	0
510	NODE_2286878_length_120_cov_2.81538_g2269464_i0	120	GTGTGGGTAGCGAAAGTCGAGGGCATTGATGCCTATAGAGACATTTGGGTTATGCTGTGATGACAGTGTAACTCGATGTCACTGCAATCTACTTTGGACCATAGCGGAAGTCGAGGGAAG	0	0	0	0	0	0	0	0	0	0	0	0	0	0	0	0	0	0	0	0	0	0	0	0	0	0	0	0	0	0	0	0	0	0	0	0	0	0	0	0	0	0	0	0	0	0
511	NODE_2294551_length_120_cov_2.32308_g2277137_i0	120	CATAGATAGTCAACGTAAGATCTAATCGAACCATGAATATATAGGATAAAAGTGTCGACTGACTTACTTTCTCATGATTTGTCGAATAACAACAAGTGAAAAAGTCAAATGAACTAATAT	0	0	0	0	0	0	0	0	0	0	0	0	0	0	0	0	0	0	0	0	0	0	0	0	0	0	0	0	0	0	0	0	0	0	0	0	0	0	0	0	0	0	0	0	0	0
512	NODE_2297872_length_119_cov_226.203_g2280458_i0	119	CATCATAGTGTCCAAGTGTGCGCTCACCCACCCTCATCATAGTGGCCCAGTGTGCGCTCAACTAGACTCATCATAGTGCCCCAGTGTGCGCTGACCTACCCTCTTCATAGTGTCCCAGT	0	0	0	0	0	0	0	0	0.877971	0	0	0	0	0	0	0	0	0	0	0	0	0	0	0	0	0	0	0	0	0	0	0	0	0	0	0	0	0	0	0	0	0	0	0	0	0
513	NODE_2300029_length_119_cov_6.79688_g2282615_i0	119	GTGCTCTTCCGATCTCTTTAATGTGGAGCACACCCGATCCAACATGTGCGGCAAGTACAACGTAGCAACCCTAACTGGAAAATGTTGAATTCCTAGATGCGATAGATCGGAAGAGCGTC	0	0	0	0	0	0	0	0	0	0	0	0	0	0	0	0	0	0	0	0	0	0	0	0	0	0	0	0	0	0	0	0	0	0	0	0	0	0	0	0	0	0	0	0	0	0
514	NODE_2302024_length_119_cov_5.45312_g2284610_i0	119	ATGGGATTCAGGGTGGGTGGCGGTAGTAATCAGGCGAGCGTTTCGCGACGATCGCTGCACTTATTGCCGTCGCCGGTCAACATCGGTGCGCGGAGCGGCAAGAGGTTCGCAGGAAAGAT	0	0	0	0	0	0	0	0	0	0	0	0	0	0	0	0	0	0.720767	0	0	0	0	0	0	0	0	0	0	0	0	0	0	0	0	0	0	0	0	0	0	0	0	0	0	0	0
515	NODE_2305452_length_119_cov_4.3125_g2288038_i0	119	CTCGTCGCCAGGGCGGCGGTGGGCGGTGACCCGCGCACGGGTGGCCCGGCCGAGCCAGGACGTCTCACCGGTTGCGACGTCGAAGTACTTCATGGCGGTTGGTCCTTCGGCTCCTGCAG	0	0	0	0	0	0	0	0	0	0	0	0	0	0	0	0	0	0	0	0	0	0	0	0	0	0	0	0	0	0	0	0	0	0	0	0	0	0	0	0	0	0	0	0	0	0
516	NODE_2309716_length_119_cov_3.71875_g2292302_i0	119	ATTAGCAGTAAGTTTTGCCGGGGTTTGGTTCCAGCTGTTCACAGGGAGATATCAAGGACCGCATGACGGGGTTGCCAGATGAAATACAGAGCGCCAGTTGGGTTTGAATTTCAGACAAA	0	0	0	0	0	0	0	0	0	0	0	0	0	0	0	0	0	0	0	0	0	0	0	0	0	0	0	0	0	2.64041	0	0	0	0	0	0	0	0	0	0	0	0	0	0	0	0
517	NODE_2312602_length_119_cov_3.20312_g2295188_i0	119	CAAGAACAAAATATGGAAAGCGTTGATGCTTATAAAAAGGAGGAAACACCAATTTACGAATCAAAAGAATCGCAAGTTGAATCTCCTTTATTAAAACAAGAACCAATGATGAATCCAAC	0	0	0	0	0	0	0	0	0	0	0	0	0	0	0	0	0	0	0	0	0	0	0	0	0	0	0	0	0	0	0	0	0	0	0	0	0	0	0	0	0	0	0	0	0	0
518	NODE_2312859_length_119_cov_3.15625_g2295445_i0	119	GCCAGAGGCTGCCCTGCTGGACGGCAGATATAGGATATTTCCGTCATCACCGGGGGTTCTGGAGCATTTGAAATACTGACTGCTTCATTGTCTAATAATGAATGTGCTGCGTTTTCTCA	0	0	0	0	0	0	0	0	0	0	0	0	0	0	0	0	0	0	0	0	0	0	0	0	0	0	0	0	0	0	0	0	0	0	0	0	0	0	0	0	0	0	0	0	0	0
519	NODE_2313896_length_119_cov_2.875_g2296482_i0	119	CGCTAATGTTACTCAACCCCGACCATCTTGATGATGCGATTGAGGAACTTGATGTGGGGATGCTCCGACACCGCGGCAGCGGCATAGGATCGGCGTGAGGCGCCACGAGACGAGAGGCA	0	0	0	0	0	0	0	0	0	0	0	0	0	0	0	0	0	0	0	0	0	0	0	0	0	0	0	0	0	0	0	0	0	0	0	0	0	0	0	0	0	0	0	0	0	0
520	NODE_2314020_length_119_cov_2.875_g2296606_i0	119	CAGGCCTCTTCCCCCCAAGGAAGTCATTTTGATTTAGAAATCTTAAAAGTTAGCCACAAGCTAGCTCCCTGTGGAAGAACTTCCCCTCCTCTATAACTAACCTGGGAGTGAAGTTTGTT	0	0	0	0	0	0	0	0	0	0	0	0	0	0	0	0	0	0	0	0	0	0	0	0	0	0	0	0	0	0	0	0	1.42351	0	0	0	0	0	0	0	0	0	0	0	0	0
521	NODE_2314026_length_119_cov_2.875_g2296612_i0	119	CTCATTTTGCCCTTTACTAAGAGACACTGTTCAAGCAACTCTCTTTGTTAGCCTTTTGAAGTGCTTAACTAAGATCTATGCTTTTCCATTAGTCCCTTAATAAAGCATTTCTCTTCTAC	0	0	0	0	0	0	0	0	0	0	0	0	0	0	0	0	0	0	0	0	0	0	0	0	0	0	0	0	0	0	0	0	0	0	0	0	0	0	0	1.51732	0	0	0	0	0	0
522	NODE_2314036_length_119_cov_2.875_g2296622_i0	119	GCCTGATTGACTCTAGTGCGTGTCCTCGGTCAACACTGGTGCGTGTCTTCAGTCAACAGCGGCCGGGCAAGGGCTCCAAAAGCTCCTCCCTCCTTCCTCCTGAGCCCAGTGACGCCGGG	0	0	0	0	0	0	0	0	0	0	0	0	0	0	0	0	0	0	0	0	0	0	0	0	0	0	0	0	0	0	0	0	0	0	0	0	0	0	0	0	0	1.24053	0	0	0	0
523	NODE_2314134_length_119_cov_2.875_g2296720_i0	119	GTTCATAGTGCCTCCGTACCTGATTAGCTATAGGTGTGACTACGAGCCGAGATTACTCTAGCACGACCTAAACGCAGCCTGTACGAAATTTCTAGGAAAGGTCTAAACAGCTCCGCCCG	0	0	0	0	0	0	0	0	0	0	0	0	0	0	0	0	0	0	0	0	0	0	0	0	0	0	0	0	0	0	0	0	0	0	0	0	0	0	0	0	0	0	0	0	0	0
524	NODE_2314203_length_119_cov_2.875_g2296789_i0	119	CTACTGCTACCTAACTATCAGTGTGTTATACAAATAAAGTTATGTTAGTAGAGAAATGCATTATAACCTACACGAGTTCAACAGAGTCCGTCTTCACTCCTTTTGCAAACTGAGCATCC	0	0	0	0	0	0	0	0	0	0	0	0	0	0	0	0	0	0	0	0	0	0	0	0	0	0	0	0	0	0	0	0	0	0	0	0	0	0	0	0	0	0	0	0	0	0
525	NODE_2314217_length_119_cov_2.875_g2296803_i0	119	CAATAATTATTTTAATACGAATACTCAATAACACTTTTATAGGTAATACCACGCACTACGTCCCCCTATCGCTCCACCTTGCCTGAGGCGGGCACAGCCGACGGCAGGGCGTGATCGAT	0	0	0	0	0	0	0	0	0	0	0	0	0	0	0	0	0	0	0	0	0	0	0	0	0	0	0	0	0	0	0	0	0	0	0	0	0	0	0	0	0	0	0	0	0	0
526	NODE_2314219_length_119_cov_2.875_g2296805_i0	119	GTACGAGCTAGTTCCGAAAGGAACCGGCAAGTCCCTGGCACCTGAGCGGTCACGAAAGGCCTAACGAGCTAGTGCACCAACGCCCGTACCGGACACCGACACAGGTGGATTGGTTGAGC	0	0	0	0	0	0	0	0	0	0	0	0	0	0	0	0	0	0	0	0	0	0	0	0	0	0	0	0	0	0	0	0	0	0	0	0	0	0	0	1.51732	0	0	0	0	0	0
527	NODE_2314226_length_119_cov_2.875_g2296812_i0	119	AGGCCTTCTTCAGCAGCTCGGATGTCATTGTAGTGTCTCAGGTCCTCCGGGAAGATATCGTAATCCGTGTAAGCAGCGTCTCCACCTCCGGCCGCCTCCAGAGCAGCGGCAGCGGCAAA	0	0	0	0	0	0	0	0	0	0	0	0	0	0	0	0	0	0	0	0	0	0	0	0	0	0	0	0	0	0	0	0	0	0	0	0	0	0	0	0	0	0	0	0	0	0
528	NODE_2314246_length_119_cov_2.875_g2296832_i0	119	GCAGAAAATAAACAGCAAGAACTTCTAGTAATCTAGCTGATCAAGATAAATCCGCAGGATTTCTGCTCTGTTCAGGAAACACATTGCAAGAACTCTGGCAAGACTATAAAACTGTCAAA	0	0	0	0	0	0	0	1.29091	0	0	0	0	0	0	0	0	0	0	0	0	0	0	0	0	0	0	0	0	0	0	0	0	0	0	0	0	0	0	0	0	0	0	0	0	0	0
529	NODE_2314295_length_119_cov_2.875_g2296881_i0	119	GTTTTAAAGCATCTCTTTCCAGCTTATAGAAGCCTAGATTCGAAACCATTTGAAAGTACCACTTTCAAAACCATTGGTTTTTTCATTAAATATAACTTTTGGGTCAAAGTGAATATAAG	0	0	0	0	0	0	0	0	0	0	0	0	0	0	0	0	0	0	0	0	0	0	0	0	0	0	0	0	0	0	0	0	0	0	0	0	0	0	0	0	0	0	0	0	0	0
530	NODE_2314329_length_119_cov_2.875_g2296915_i0	119	GTATCAAAGTTTGTTAAATTTTAAATGGAAAAGTTGCAGTAGTTCATGGATAAGCATGTAGCTAAAAATTGTTAAGTGATAATTGAATCTGACATTGGCTAACCAGAAGAGCTTGACCA	0	0	0	0	0	0	0	0	0	0	0	0	0	0	0	0	0	0	0	0	0	0	0	0	0	0	0	0	0	0	0	0	0	0	0	0	0	0	0	0	0	0	0	0	0	0
531	NODE_2322688_length_119_cov_2.375_g2305274_i0	119	CTTGTTTCTTCTAGAGAGGAGCCATAAATAGGTGCAACCGTGTAACTGTGCTACACCCCTACTGATTGATTCCAAGACCGTTTCTATGCAAGCAAGGGAGTTATTTAGACATACAGTCC	0	0	0	0	0	0	0	0	0	0	0	0	0	0	0	0	0	0	0	0	0	0	0	0	0	0	0	0	0	0	0	0	0	0	0	0	0	0	0	0	0	0	0	0	0	0
532	NODE_2323659_length_119_cov_2.15625_g2306245_i0	119	CAGCAGCTGCTTCACTGCCGCTGTAAGTGTCCATCCTTTATCATAACCTCTGTGGTTTGGTCTTGGATGGAAATACCCATTTGCACCGGCTTGATTCAGTTGTGTGCGTGATTTTAAAC	0	0	0	0	0	0	0	0	0	0	0	0	0	0	0	0	0	0	0	0	0	0	0	0	0	0	0	0	0	0	0	0	0	0	0	0	0	0	0	0	0	0	0	0	0	0
533	NODE_2323667_length_119_cov_2.15625_g2306253_i0	119	CTTGATCGTCGCTCTAAAACTCAGATATTCGACGTGGTTACTGGAACATCCAATCAGTTGTCAAAGAACTGAACCAATCCCGCACGCGAACCGGATTTCTCCGATAGACGGGGCACTGG	0	0	0	0	0	0	0	0	0	0	0	0	0	0	0	0	0	0	0	0	0	0	0	0	0	0	0	0	0	0	0	0	0	0	0	0	0	0	0	0	0	1.36092	0	0	0	0
534	NODE_2333923_length_118_cov_4.38095_g2316509_i0	118	CTGAAGACATTCTGTCGTCAGGATTTAATCTACAGGAGTCTTCTATGCGATTCCGACTTAGGATCGCTCGGAAGAGGGTGCCTACTCATGTAGGTTAAATCCTGAAGACATTCTGTCG	0	0	0	0	0	0	0	0	0	0	0	0	0	0	0	0	0	0	0	0	0	0	0	0	0	0	0	0	0	0	0	0	0	0	0	1.93427	0	0	0	0	0	0	0	0	0	0
535	NODE_2333983_length_118_cov_4.38095_g2316569_i0	118	AAATTTTTGATTTTCCGATTTTGACATAAAAAACTCCAATTCTGTTATTAAAAGTTATAGGCATTAATGCAAAATCATTATACAATTTATTCTAAATAAAAAGAAATGTAAAATGTGT	0	0	0	0	0	0	0	0	0	0	0	0	0	0	0	0	0	0	0	0	0	0	0	0	0	0	0	0	0	0	0	0	0	0	0	0	0	0	0	0	0	0	0	0	0	0
536	NODE_2334024_length_118_cov_4.36508_g2316610_i0	118	GACGCCACCACCCGCACCTCGGTCTACGGCCGCGTGGGCTATAACCGCGCCACCCGCACCGTCAACGACATCGACCTGACGCCGCAAAAGCTGGCGACGGCGGCGCTGGGTCTCAGCC	0	0	0	0	0	0	0	0	0	0	0	0	0	0	0	0	0	0	0	0	0	0	0	0	0	0	0	0	0	0	0	0	0	0	0	0	0	0	0	0	0	0	0	0	0	0
537	NODE_2334329_length_118_cov_4.28571_g2316915_i0	118	AGCCATAAAGCCATTCTTTTGGTTTGTTCTAAAGTCTTAGTATCAAATGCATCGTTGAGGGAATTGTTGGCCCTGGAGGATTTGTTCTTCTTTGTTTTGGTATTGTGCAGTTTTTTCT	0	0	0	0	0	0	0	0	0	0	0	0	0	0	0	0	0	0	0	0	0	0	0	0	0	0	0	0	0	0	0	0	0	0	0	0	0	0	0	0	0	0	0	0	0	0
538	NODE_2336148_length_118_cov_4.03175_g2318734_i0	118	GGTAGCCTATGTCAGATCTGAGATCTGGGAAAGGAACTTGCTGATGCTGCAAGAAAATGTAAAATTCTTGCTCAGTCTGCTGAAGCAGATACAACAATGCTGTACAACATATACTACC	0	0	0	0	0	0	0	0	0	0	0	0	0	0	0	0	0	0	0	0	0	0	0	0	0	0	0	0	0	0	0	0	0	0	0	0	0	0	0	0	0	0	0	0	0	0
539	NODE_2338772_length_118_cov_3.68254_g2321358_i0	118	TGAAGATGCCGTCGTAGTAGTGACCTTCAACGATAGAACCAGCTTCGGTGGGTGCGGGGGAGATAACGGAAGAAGTAGACAAGTCGACAGGTGCGGTCGCGACGATTGCAGGCTCTGC	0	0	0	0	0	0	0	0	0	0	0	0	0	0	0	0	0	0	0	0	0	0	0	0	0	0	0	0	0	0	0	0	0	0	0	0	0	0	0	0	0	0	0	0	0	0
540	NODE_2342679_length_118_cov_2.92063_g2325265_i0	118	GCTTGATAAGTATGAATGAAGCCACCGCTATAGTCACAATATAATGAGAGTTTGATAAATCTGTTTAACCTGACAAGACAAAATTACAGAAGAAGTATGCCTGGATTGTGAGTTACCT	0	0	0	0	0	0	0	0	0	0	0	0	0	1.29653	0	0	0	0	0	0	0	0	0	0	0	0	0	0	0	0	0	0	0	0	0	0	0	0	0	0	0	0	0	0	0	0
541	NODE_2342681_length_118_cov_2.92063_g2325267_i0	118	GGGCATCATTCTCATGCTTTCCTTTGGTTCCTTAGACATAGTTTCCCTTAGTTCCCTGAACACATCTCAAATAATTGATTCATACCCTTTGTCTTGCAAGTGCAATGTCCCTGTTTCC	0	0	0	0	0	0	0	0	0	0	0	0	0	0	0	0	0	0	0	0	0	0	0	0	0	0	0	0	0	0	0	0	0	0	0	0	0	0	0	0	0	0	0	0	0	0
542	NODE_2342702_length_118_cov_2.92063_g2325288_i0	118	CCACGTTCCAGTGAGCTTCGTCTGCCTGTGCGCGGAAACATCCCAAAGGCCCTTGCCCTACAATTCCACCGCTTCCGGTTACTTACGCGGCAGATTCAAATGGGATAGGCTTCTCCCG	0	0	0	0	0	0	0	0	0	0	0	0	0	0	0	0	0	0	0	0	0	0	0	0	0	0	0	0	0	0	0	0	0	0	0	0	0	0	0	0	0	0	0	0	0	0
543	NODE_2342834_length_118_cov_2.92063_g2325420_i0	118	CCCCGCTCCTCCCGGTCAGCGTCGACAACAACTCGCCGCAGCCCGCCTCCTCGTCATCGTCTAGCCACGGTGGAGAGCAGCTCCCGCTCTCGCTCCCCTTCAACTCGTCGAAGGCCGG	0	0	0	0	0	0	0	0	0	0	0	0	0	0	0	0	0	0	0	0	0	0	0	0	0	0	0	0	0	0	0	0	0	0	0	0	0	0	0	0	0	0	0	0	0	0
544	NODE_2342857_length_118_cov_2.92063_g2325443_i0	118	GTGACCTCGAGGCGGAAGCCGTCGTCGAGGCGGCCTCCACCCGCACCGGGCGTCGTTCTCCGCTCGTGTAGGCGTGCTCGACGGCGTTGGCGATCGCCTCGTTGGCCGCCAGCAGCAG	0	0	0	0	0	0	0	0	0	0	0	0	0	0	0	0	0	0	0	0	0	0	0	0	0	0	0	0	0	0	0	0	0	0	0	0	0	0	0	0	0	0	0	0	0	0
545	NODE_2342984_length_118_cov_2.92063_g2325570_i0	118	GGCCGGTGTTATCATATTACGTGTAGAGAAAGGAGCGGATCTGAGAAATTTTTGGTAAGTGCTTCTTGAGTTTTGTGTGCTCTTGGCTTTCTCTTTCTCGAGGATTGGGGGTTTCTGG	0	0	0	0	0	0	0	0	0	0	0	0	0	0	0	0	0	0	0	0	0	0	0	0	0	0	0	0	0	0	0	0	0	0	0	0	0	0	0	0	0	0	0	0	0	0
546	NODE_2343041_length_118_cov_2.92063_g2325627_i0	118	GGACACGCGGTTGATGGCTACTACGCGCTCGACGTACGCGGACTTCTCCTCGCGGGGAGTGCGCTCCTTGCGCTCCCGGCGATCGCCGGCGCCACCACTGCGGCGCGACGTTTCTGAC	0	0	0	0	0	0	0	0	0	0	0	0	0	0	0	0	0	0	0	0	0	0	0	0	0	0	0	0	0	0	0	0	0	0	0	0	0	0	0	0	0	0	0	0	0	0
547	NODE_2343055_length_118_cov_2.92063_g2325641_i0	118	GGCACGCACGATTGATGTATGAATGATGTCTCGAAGGAAATACTCCCTACTTGCACACAGATGATACAAGTGTTTGCTTCTTTTTATCATGGAAAAAGTCAGGCGCGGCACATAGTCC	0	0	0	0	0	0	0	0	0	0	0	0	0	0	0	0	0	0	0	0	0	0	0	0	0	0	0	0	0	0	0	0	0	0	0	0	0	0	0	0	0	0	0	0	0	0
548	NODE_2343078_length_118_cov_2.92063_g2325664_i0	118	CACACAGAAGGATAAGGACAATTGAATCCATTGAGTGAAAAGGAAAAATACTCCCAGCAAAGTGAGAAGGGCTCCTGCCAACAGGCCCCCCTCTCACAGACTGAATCCCAGATCATCA	0	0	0	0	0	0	0	0	0	0	0	0	0	0	0	0	0	0	0	0	0	0	0	0	0	0	0	0	0	0	0	0	0	0	0	0	0	0	0	0	0	0	0	0	0	0
549	NODE_2343155_length_118_cov_2.90476_g2325741_i0	118	GTGAGAAGCACCGCTGTTGGGGACAGAGGTGACGGAGGCAGAGGCGGCAGGGGCAGTGGACTTGTGCTCCTCGGACTGAGTGGCAGAGGGCTTTCGGACAGTGCTGATGGTGGTGCCG	0	0	0	0	0	0.745312	0	0	0	0	0	0	0	0	0	0	0	0	0	0	0	0	0	0	0	0	0	0	0	0	0	0	0	0	0	0	0	0	0	0	0	0	0	0	0	0
550	NODE_2343406_length_118_cov_2.88889_g2325992_i0	118	AGGAGCTTCACCACCGCACTCGCCGCCTCCGCCCTCGGGGTCGCCGCCGTTCCCACTCTCTCCGCCTGCGGCGGCTCAGCGGGCGGCTCGGGCGACGGCACCTCCCTGGTCATCTGGC	0	0	0	0	0	0	0	0	0	0	0	0	0	0	0	0	0	0	0	0	0	0	0	0	0	0	0	0	0	0	0	0	0	0	0	0	0	0	0	0	0	0	0	0	0	0
551	NODE_2348575_length_118_cov_2.61905_g2331161_i0	118	GAAGACAGGTTGATATTCCTGTACTATTATGTCGTCGTTATACGAAGGAGTGACGGAGAAGGTTAGAGACGCGGACTGAAGAGAATAGTCCGTCTAAGCATCAAGTTGAGTATGTAGG	0	0	0	0	0	0	0	0	0	0	0	0	0	0	0	0	0	0	0	0	0	0	0	0	0	0	0	0	0	0	0	0	0	0	0	0	0	0	0	0	0	0	0	0	0	0
552	NODE_2352739_length_118_cov_2.19048_g2335325_i0	118	GTCCAACCAAATCTCCACCTGTCTGTCTAGTGACAGTAGAACAACGAAGGGATCTTCATCCACACCTCAACCCAGTAGGCCCTCATCAACCCGTGACTGCTTCAGAAGTCAACCTAAG	0	0	0	0	0	0	0	0	0	0	0	0	0	0	0	0	0	0	0	0	0	0	0	0	0	0	0	0	0	0	0	0	0	0	0	0	0	0	0	0	0	0	0	0	0	0
553	NODE_2364098_length_117_cov_4.93548_g2346684_i0	117	CAGCCGCATTGGTGGCAGGAGTGGCGGCCGGGGCGCCATCGTTGGTTGACGCGTTGTCCCCGCGCGGCGTCTTTGGTGGCGCCGGTGGGTCGGCCTCTGCCGCCGCGTCGGCCGCGG	0	0	0	0	0	0	0	0	0	0	0	0	0	0	0	0	0	0	0	0	0	0	0	0	0	0	0	0	0	0	0	0	0	0	0	0	0	0	0	0	0	0	0	0	0	0
554	NODE_2367077_length_117_cov_4.45161_g2349663_i0	117	GTTCATTCCGACACTGGATCTATCTCACAATCCCCAGTGAAGCTGGTCTTCTCGCGACCAACGCCCTATAATTTCAACACCGCATAGGGATTGCGGGATCGAGTGAGGATCAGCTTC	0	0	0	0	0	0	0	0	0	0	0	0	0	0	0	0	0	0	0	0	0	0	0	0	0	0	0	0	0	0	0	0	0	0	0	0	0	0	0	0	0	0	0	0	0	0
555	NODE_2374662_length_117_cov_3.70968_g2357248_i0	117	TAATTACTTGCGCACAAACGGTAAGTGCGTTAAAGCTGTAAGGCGAGAGTACACAAAACCTACGGGTGCTGTGATAAGAGTGAGAACAACTTCCAAGAAAAGCGAGTTATGCTACCC	0	0	0	0	0	0	0	0	0	0	0	0	0	0	0	0	0	0	0	0	0	0	0	0	0	0	0	0	0	0	0	0	0	0	0	0	0.821093	0	0	0	0	0	0	0	0	0
556	NODE_2381132_length_117_cov_2.96774_g2363718_i0	117	ACTGGGTCTCCAGGTCTTTTCAACCAAAATATCACAAAAGTTGCACAAATGATACAATGGCTCTAAAACCTCACGATTAATTGAGACAGAGGCACTGACGTTCCATATCCATTTTGG	0	0	0	0	0	0	0	0	0	0	0	0	0	0	0	0	0	0	0	1.57653	0	0	0	0	0	0	0	0	0	0	0	0	0	0	0	0	0	0	0	0	0	0	0	0	0	0
557	NODE_2381600_length_117_cov_2.96774_g2364186_i0	117	CTGCGGCTTGCAACTTGCTTGCGTTAGCTTGTCCTCAAACGGATCTCTAGGGCGGCTTATAAAGGCGCCAGCCCCAGAGCGTACAATTCGAGTCTTAGTCAGATACAACTAGAAACC	0	0	0	0	0	0	0	0	0	0	0	0	0	0	0	0	0	0	0	0	0	0	0	0	0	0	0	0	0	0	0	0	0	0	0	0	0	0	0	0	0	0	0	0	0	0
558	NODE_2386169_length_117_cov_2.96774_g2368755_i0	117	TCATAAACTTTTGTAGTTTTCCGGAAGGTATGTTTGTTGAGCTTTCTCCTTTCTCAAAACAGAAGGGTGAATTGCCATTAAACTGAGAATTAAAAACCAAAACACAACAGTTCATGA	0	0	0	0	0	0	0	0	0	0	0	0	0	0	0	0	0	0	0	0	0	0	0	0	0	0	0	0	0	0	0	0	0	0	0	0	0	0	0	0	0	0	0	0	0	0
559	NODE_2386366_length_117_cov_2.96774_g2368952_i0	117	GCCAGCTTCGCAGCCGCATGCCCTGACTTTCGATGCCTGGATCTGCTGCGTGCTAAAACCTTGGCCCCCGTGGCGCGCAGTGATGCCGCGGCCTGGAGGTAGTCATGGAGTTCTCGG	0	0	0	0	0	0	0	0	0	0	0	0	0	0	0	0	0	0	0	0	0	0	0	0	0	0	0	0	0	0	0	0	0	0	0	0	0	0	0	0	0	0	0	0	0	0
560	NODE_2388024_length_117_cov_2.96774_g2370610_i0	117	GTGCGGTTCGCTGCCCCCTGTCCAATGAGCTGGGGTTCTCCCTCTCCTCCACTCTCCAGGGCCTTGATGCCTCCTAGCGTCACCACCTCTCACCTGGGGAGCAACCATGAATCGTTA	0	0	0	0	0	0	0	0	0	0	0	0	0	0	0	0	0	0	0	0	0	0	0	0	0	1.32791	0	0	0	0	0	0	0	0	0	0	0	0	0	0	0	0	0	0	0	0
561	NODE_2388877_length_117_cov_2.96774_g2371463_i0	117	CTCCACGTCGCAACGTCCTTGAACACAGACCGGCAAGTGGCACGGCGATACGGGTCGACACCCGCTGCCGCGCAGGGCGAACCGTCGATCGCCAGGGCCTGAAATCCGGCCCTGCAC	0	0	0	0	0	0	0	0	0	0	0	0	0	1.29653	0	0	0	0	0	0	0	0	0	0	0	0	0	0	0	0	0	0	0	0	0	0	0	0	0	0	0	0	0	0	0	0
562	NODE_2390103_length_117_cov_2.96774_g2372689_i0	117	CTGTATCTTCTCCGCCGCGTCGTCCTCCAGGAGCGGCTGCCGTTTGCTGCGCAGGGCCGCCTGCACCTCGCGCTCGTGCTGCACCTCCCGCGTCACGGCAGCATGCCGCTTGGCCTC	0	0	0	0	0	0	0	0	0	0	0	0	0	0	0	0	0	0	0	0	0	0	0	0	0	0	0	0	0	0	0	0	0	0	0	0	0	0	0	0	0	0	0	0	0	0
563	NODE_2408458_length_117_cov_2.22581_g2391044_i0	117	CGGCCTTTGGCTGGGGCGGCGACTTTGCGTTTATGCTTAGCTTTTGCGGTTGTCATGTACGCCTCGCCGCAGAGGGACTGTTCATCGTGTTTGGGCTGGGGCCGTGCAGTCTCTTGG	0	0	0	0	0	0	0	0	0	0	0	0	0	0	0	0	0	0	0	0	0	0	0	0	0	0	0	0	0	0	0	0	0	0	0	0	0	0	0	0	0	0	0	0	0	0
564	NODE_2409125_length_117_cov_2.20968_g2391711_i0	117	GTGCTCTTCCGATCTGCTGTGTAGACTGACTGGGAAAAAAGAGAGAAGACTCAAATTGTTGAAATCGAGAATTAAGGAGGGAATATCGTCGCTAATTTTACAGAAATAAGAATTATT	0	0	0	0	0	0	0	0	0	0	0	0	0	0.515286	0	0	0	0	0	0	0	0	0	0	0	0	0	0	0.572497	0	0	0	0	0	0	0	0	0	0	0	0	0	0	0	0	0
565	NODE_2409303_length_117_cov_2.19355_g2391889_i0	117	GCCGAGCCGGGGGCGACCGGCGGCTGCGCGGAGGCGGTGCCCTTGCTCGCGGCGTTGCCGTTCGCGGCCGACGCAGAGGTGTCGCCCTCCTGCTCCTCCCCGGGGAAGGGCTTGGTG	0	0	0	0	0	0	0	0	0	0	0	0	0	0	0	0	0	0	0	0	0	0	0	0	0	0	0	0	0	0	0	0	0	0	0	0	0	0	0	0	0	0	0	0	0	0
566	NODE_2411136_length_117_cov_2.09677_g2393722_i0	117	GCTCTGCAAGGAGCGCCCAAGGGGCTTGGCTGCCCCTTGCCAGCTCTCCAGATAGACATCATCCATCCCGACAACTCCAGTATCACCCACTGGCCCCGTCAAACTCTCTGATATGCA	0	0	0	0	0	0	0	0	0	0	0	0	0	0	0	0	0	0	0	0	0	0	0	0	0	0	0	0	0	0	0	0	0	0.784019	0	0	0	0	0	0	0	0	0	0	0	0
567	NODE_2419204_length_116_cov_5.39344_g2401790_i0	116	CTTTATTTTTGTTGCTCCTTACATGACAAGCTATAGCTAGCTTGAATCATTTTGGCTACTGTGGTAGGCTCAGGAGACAGTGGGATTCAATCCAGTAGGTATATACACAAATAAAG	0	0	0	0	0	0	0	0	0	0	0	0	0	0	0	0	0	0	0	0	0	0	0	0	0	0	0	0	0	0	0	0	0	0	0	0	0	0	0	0	0	0	0	0	0	0
568	NODE_2421085_length_116_cov_4.86885_g2403671_i0	116	GAGCCCCGCTGCGTACCCGACGGCGCCGGGCTCGTATCAGGTCGGGCCGGCGTCCGGCGCGATGGGCGGCAACAGCGCGACGGGGCAGTTGACCATCCAGGCGTTTCCGCAGCCCG	0	0	0	0	0	0	0	0	0	0	0	0	0	0	0	0	0	0	0	0	0	0	0	0	0	0	0	0	0	0	0	0	0	0	0	0	0	0	0	0	0	0	0	0	0	0
569	NODE_2422134_length_116_cov_4.52459_g2404720_i0	116	GCGTCAAGCGCAAGCGCGCGGCGGCTGCCGCGGCTAAGGGTGGCGATGATGCCGAGGAGGCTGAGGAGGACGAGTAAATCCGCACGCCTGGTGCAACTTTCGCGTCTGTTTTTTGC	0	0	0	0	0	0	0	0	0	0	0	0	0	0	0	0	0	0	0	0	0	0	0	0	0	0	0	0	0	0	0	0	0	0	0	0	0	0	0	0	0	0	0	0	0	0
570	NODE_2422179_length_116_cov_4.52459_g2404765_i0	116	GTTATCACCACAATTTGTAACTCTCCTCAACTAAATGACGTTATTGCCCTACAACCCCATTCATGTAAACACGAATGGTTTGGGCTCTTCCCCTTTTCGCTCGCCGCTACTAAGGG	0	0	0	0	0	0	0	0	0	0	0	0	0	0	0	0	0	0	0	0	0	0	0	0	0	0	0	0	0	0	0	0	0	0	0	0	0	0	0	0	0	0	0	0	0	0
571	NODE_2422222_length_116_cov_4.52459_g2404808_i0	116	CCTCGTTGGTGGGAGTTTGCTTCTTTTGGTTGCGAGGCCTGTTCCACCCGAAGGGCTTGCGGTTGCGGGGGTTACGTCGGCCCTTGTTCCGGCCTGTGTGTCGGACGGTGTCGTTG	0	0	0	0	0	0	0	0	0	0	0	0	0	0	0	0	0	0	0	0	0	0	0	0	0	0	0	0	0	0	0	0	0	0	0	0	0	0	0	0	0	0	0	0	0	0
572	NODE_2422242_length_116_cov_4.52459_g2404828_i0	116	GATTTTCCTGCGGCCTTCTGCACAGCGGGGCCTGCGGTTGCCTCCCCTCCTCCCGGGGGTGCTTCTGTGGTTGAGATGAAGTAGAAGCAATTAGACAATAAATGCGAATTGCTGGC	0	0	0	0	0	0	0	0	0	0	0	0	0	0	0	0	0	0	0	0	0	0	0	0	0	0	0	0	0	0	0	0	0	0	0	0	0	0	0	0	0	0	0	0	0	0
573	NODE_2422417_length_116_cov_4.52459_g2405003_i0	116	CGACAATCCTGAGAGGCGATGAGGAGGACGCTTGCGTCCACAAACTCGGTGATCGTCCGCTTCCAAGAAAAGCCTCGGTAGAGTTAACTGCTAGGGCGACCGTACCGCAAACCGAC	0	0	0	0	0	0	0	0	0	0	0	0	0	0	0	0	0	0	0	0	0	0	0	0	0	0	0	0	0	0	0	0	0	0	0	0	0	0	0	0	0	0	0	0	0	0
574	NODE_2435932_length_116_cov_3.01639_g2418518_i0	116	CCAGTTTTGATTTATTTTGCAGAAGATTTTGTTTGACTCTTCTTGCAAATGCTTCATCGCTTGGGGGGAGTCACAACACTTCGTCAGTGTTGTCTAAATCAGAGCGCGTATTCTAC	0	0	0	0	0	0	0	0	0	0	0	0	0	0	0	0	0	0	0	0	0	0	0	0	0	0	0	0	0	0	0	0	0	0	0	0	0	0	0	0	0	0	0	0	0	0
575	NODE_2438287_length_116_cov_3.01639_g2420873_i0	116	CGGGGAACCCGTCACTGTCCCGCCAAGGTCTGTATACGACAGCAGAGCATAATTGCTAGAACTATTAGTCGCATTTCCAGTAACCGTAACATACTGAGTCAACACCCCCATCGTGG	0	0	0	0	0	0	0	0	0	0	0	0	0	0	0	0	0	0	0	0	0	0	0	0	0	0	0	0	0	0	0	0	0	0	0	0	0	0	0	0	0	0	0	0	0	0
576	NODE_2438411_length_116_cov_3.01639_g2420997_i0	116	CTTTGATTTCTTCGTAGTGGTCGGGTGGTGGGGACGGCCCTTGGTTCTGTTCCGACGTCTGGTGACGGAACTTGCGCTGGGGCCTGGGCTAGGGGCGCGTACGGTTTCGCTTTGCG	0	0	0	0	0	0	0	0	0	0	0	0	0	0	0	0	0	0	0	0	0	0	0	0	0	0	0.812844	0	0	0	0	0	0	0	0	0	0	0	0	0	0	0	0	0	0	0
577	NODE_2439644_length_116_cov_3.01639_g2422230_i0	116	GAGATTCCTATACCCGGCCGCGGTGGGCCGTATCGCTTCCCTATGCCGCCTTCGTCATCCTGGTGAGGACGAGACGGAAGGGAGAGAGGCGATGCTCGACGCTCTGGCGATCCTGG	0	0	0	0	0	0	0	0	0	0	0	0	0	0	0	0	0	1.54543	0	0	0	0	0	0	0	0	0	0	0	0	0	0	0	0	0	0	0	0	0	0	0	0	0	0	0	0
578	NODE_2440255_length_116_cov_3.01639_g2422841_i0	116	CCATCCTTTGCACCATCCACAATACCCACGCGCCGTTTTGGCAGTGGCGCCCTATTGCTCCCGCCAGAACACCAGCAACGCCCTCCATTTTCATCAATTTTTGACGGATTCTCGAC	0	0	0	0	0	0	0	0	0	0	0	0	0	0	0	0	0	0	0	0	0	0	0	0	0	0	0	0	0	0	0	0	0	0	0	0	0	0	0	0	0	0	0	0	0	0
579	NODE_2442755_length_116_cov_3_g2425341_i0	116	CACAAGTGCCAACGACAACGACGCACTCGCCATTGCCGCCTAAGGGTCCGTCATCCCTCACCGGATGACTACCTTGGACGGACAGCGCCGCCGGACCGGGCGGGGCAACAGAACCC	0	0	0	0	0	0	0	0	0	0	0	0	0	0	0	0	0	0	0	0	0	0	0	0	0	0	0	0	1.32638	0	0	0	0	0	0	0	0	0	0	0	0	0	0	0	0	0
580	NODE_2442844_length_116_cov_3_g2425430_i0	116	CCAAAAATACAGGTATAGAATAAAGTAAAAAGACAAACAAAGAGGCCGAATTGAGAAGTTAAAATAGGGTAAAAACAGAAATCTTGTTAAAAGATCGGAAAGGGGGAGTAATAAGA	0	0	0	0	0	0	1.56143	0	0	0	0	0	0	0	0	0	0	0	0	0	0	0	0	0	0	0	0	0	0	0	0	0	0	0	0	0	0	0	0	0	0	0	0	0	0	0
581	NODE_2444677_length_116_cov_2.96721_g2427263_i0	116	CTTGCTTCGTAGCACCGCCGCCGCTGGTTTGGAAAGCGCCGTCGCTTGTAGCCAACAGTACCGCTGGTGCTGCCGCTGGTAGCACCTCTGCCCACGGCTTGCAGCATCGACGGCCA	0	0	0	0	0	0	0	0	0	0	0	0	0	0	0	0	0	0	0	0	0	0	0	0	0	0	0	0	0	0	0	0	0	0	0	0	0	0	0	0	0	0	0	0	0	0
582	NODE_2455223_length_116_cov_2.57377_g2437809_i0	116	CACTTGTATTGTATCAGTCGTGAGCACACATATTCTATAAAGGAATTTAAATCATTAGACGTGATTCAGTATGGAGCCTGCAGCCTACTATAGACACTAGAGATACAAGACAAGTG	0	0	0	0	0	0	0	0	0	0	0	0	0	0	0	0	0	0	0	0	0	0	0	0	0	0	0	0	0	0	0	0	0	0	0	0	0	0	0	0	0	0	0	0	0	0
583	NODE_2457169_length_116_cov_2.47541_g2439755_i0	116	CCGCCGACCTGAGGGTCGAGCTTCCGCCTCCGGACACCACGCCCTACCTGCGGCTGGCGCTGGCGCTGTCGCTGGGGGCGGCGGTGTCGCTGGGCATCACCCGCTTTGCCTACGGC	0	0	0	0	0	0	0	0	0	0	0	0	0	0	0	0	0	0	0	0	0	0	0	0	0	0	0	0	0	0	0	0	0	0	0	0	0	0	0	0	0	0	0	0	0	0
584	NODE_2458777_length_116_cov_2.2623_g2441363_i0	116	CCCACGTACAGGGAATCGGTCACAGTCATTTCCAAAGCAACGACGCGTTCAGAAGGCCACTATCAAGGCCGCAGGAGGCGAAGTTTATGGACATAAACGAGCCGACGAGAACGCAG	0	0	0	0	0	0	0	0	0	0	0	0	0	0	0	0	0	0	0	0	0	0.959857	0	0	0	0	0	0	0	0	0	0	0	0	0	0	0	0	0	0	0	0	0	0	0	0
585	NODE_2460889_length_116_cov_2.14754_g2443475_i0	116	GTGAAAAGTACTTGAAATCGCTGGGCGCCAAGGGTTTGGGAGCCCCGCCAATCCAGTTCTCTGAGCTGGTACTAATCGGTTAAGTTGGGAAGTCCCGGTTGTCTGCCGAGCACTTC	0	0	0	0	0	0	0	0	0	0	0	0	0	0	0	0	0	0	0	0	0	0	0	0	0	0	0	0	0	0	0	0.575517	0	0	0	0	0	0	0	0	0	0	0	0	0	0
586	NODE_2466258_length_115_cov_7.66667_g2448844_i0	115	TTCATCTGTAATGTAAAATCCACAATAATGTAAACTATCTTTCCTAGCGATGCGTAAAAGCAACACTAATTACCAGACTGATAACTTCCCCCGAATTCCACAATTTCATTGAAAG	0	0	0	0	0	0	0	0	0	0	0	0	0	0	0	0	0	0	0	0	0	0	0	0	0	0	0	0	0	0	0	0	0	0	0	0	0	0	0	0	0	0	0	0	0	0
587	NODE_2477863_length_115_cov_4.21667_g2460449_i0	115	GAGCAGGCGAAAATTCCTGCACCGCTCATGAAGCGATAAAGACACAGTGGAGGGACGCGGAAGGGTAGTCCTAGGCCCTGACGGATTGGGCCGCGAGACTTGTAGGTGGAGAGCT	0	0	0	0	0	0	0	0	0	0	0	0	0	0	0	0	0	0	0	0	0	0	0	0	0	0	0	0	0	0	0	0	0	0	0	0	0	0	0	0	0	1.7549	0	0	0	0
588	NODE_2481083_length_115_cov_3.9_g2463669_i0	115	AGGAGCGTCCAAGGGGCTTGGCTGTCTCTTGCCAGCTCTCCAGACAGACATCACCCATCCTGACAACTTTAGTATCACCCACTGGCTCTGTCAAACTTTCCGAGATCGGAAGAGC	0	0	0	0	0	0	0.549895	0	0	0	0	0	0	0	0	0	0	0	0	0	0	0	0	0	0	0	0	0	0	0	0	0	0	0	0	0	0	0	0	0	0	0	0	0	0	0
589	NODE_2481534_length_115_cov_3.83333_g2464120_i0	115	GTTTTACCATTCTCCATTTTGGGAGAAATGTTATCAGGACAAATTATTTCGGATTGGTAGCCCTCATCTCCTCCCATCAGAGTAAGAATTTGTTGTTTTCCAGGGGTTGATCGAC	0	0	0	0	0	0	0	0	0	0	0	0	0	0	0	0	0	0	0	0	0	0	0	0	0	0	0	0	0	0	0	0	0	0	0	0	0	0	0	0	0	0	0	0	0	0
590	NODE_2486210_length_115_cov_3.25_g2468796_i0	115	CGCTCTTCCGATCTCTTCCATGCCTAGATCCGGGCCCTCCTCGATGGAGCGTGTACTTCTCGTTTACGGAGTTTGTCGATGAGCGGCGGAGGAGGCCGTCCAGATCGGAAGAGCA	0	0	0	0	0	0	0	0	0	0	0	0	0	0	0	0	0	0	0	0	0	0	0	0	0	0	0	0	0	0	0	0	0	0	0	0	0	0	0	0	0	0	0	0	0	0
591	NODE_2487186_length_115_cov_3.06667_g2469772_i0	115	GTTAAATAACCCCGTTTACTGCGAAAATTTGCAGTAGAATTAATGAAATGTTAGTTTTTTAGTGAAACCCTGCAAACCTGCATGCGTTACAGTCGCGGACTTCGCCTGTAATCAC	0	0	0	0	0	0	0	0	0	0	0.637954	0	0	0	0	0	0	0	0	0	0	0	0	0	0	0	0	0	0	0	0	0	0	0	0	0	0	0	0	0	0	0	0	0	0	0
592	NODE_2488700_length_115_cov_3.06667_g2471286_i0	115	CGTAAAACAACGAAAACCTATAGGAGGAAAGAAGAATATAGGGAATCCAGAGGGTGAAAACCCAAGGGTGAAGAACCCATCAAGAAACTCTGCGAACTGAAACATCTAAGTAGCG	0	0	0	0	0	0	0	0	0	0	0	0	0	0	0	0	0	0	0	0	0	0	0	0	0	0	0	0	0	0	0	0	0	0	0	0	0	0	0	0	0	1.24576	0	0	0	0
593	NODE_2488998_length_115_cov_3.06667_g2471584_i0	115	TACCGGTTTAGACGCGTATAGCCAAAACGCGCTCGAGCTACCACACCGTGTCATGCCATCGCTCTCACCTGGGATCAGATCCGGGACTCGACCGGCTTGCGCCGGCCAACCTCCG	0	0	0	0	0	0	0	0	0	0	0	0	0	0	0	0	0	0	0	0	0	0	0	0	0	0	0	0	0	0	0	0	0	0	0	0	0	0	0	0	0	0	0	0	0	0
594	NODE_2491590_length_115_cov_3.06667_g2474176_i0	115	TAGGCGCCGATGCCGGCGAAGGCCGCCTGGCCGAAGGAGGTGAGCCCGCCGACGCCCGTCAGCAGCACCAGGCCCAGCACGACGAGGGAGAACAGGCCGATGTAGTTGAGCTGCG	0	0	0	0	0	0	0	0	0	0	0	0	0	0	0	0	0	0	0	0	0	0	0	0	0	0	0	0	0	0	0	0	0	0	0	0	0	0	0	0	0	0	0	0	0	0
595	NODE_2491693_length_115_cov_3.06667_g2474279_i0	115	ACCGCTGTTCCCGAAAATCTCCACCCCGATGAAATCTCTTAACAAAGTTAGCACAGAAGACACAAGTGCCGGGATCCTTAGTAGTCGTTACAACCTGTACAACCATCCCAGAGAC	0	0	0	0	0	0	0	0	0	0	0	0	0	0	0	0	0	0	0	0	0	0	0	0	0	0	0	0	0	0	0	0	0	0	0	0	0	0	0	0	0	0	0	0	1.61083	0
596	NODE_2492414_length_115_cov_3.06667_g2475000_i0	115	AGAAGGAGCTGCGCGAGGCCTGGGAGAAGCTCAAGAAGGAGAACGAGGACCTCAAGAACAAGCTCGCCCCCCGCGACACCACCATCCGCGCCCTCGAGCTCAAGCTGGGCCAGGC	0	0	0	0	0	0	0	0	0	0	0	0	0	0	0	0	0	0	0	0	0	0	0	0	0	0	0	0	0	0	0	0	0	0	0	0	0	0	0	0	0	0	0	0	0	0
597	NODE_2494128_length_115_cov_3.06667_g2476714_i0	115	GCTAAATTCGGATGAATAAATCCAACGGACTCAAGAGCAATTTCCTTGACGAAAATACAACAGAAATGGGTGCCCACACCTTGAACAGTTCCACTTCTACCACTACCTTACGTTC	0	0	0	0	0	0	0	0	0	0	0	0	0	0	0	0	0	0	0	0	0	0	0	0	0	0	0	0	0	0	0	0	0	0	0	0	0	0	0	0	0.658745	0	0	0	0	0
598	NODE_2496365_length_115_cov_3.06667_g2478951_i0	115	GTTATTTCGGGTTATTTCCCAAAAATGTAGGATACTTAAGCTATAAGCCAAGATACTTAGTTTTGTATAGAATGTTAGTGCAATCTACTAAAAGTGAAATGATTCACGATCTAAA	0	0	0	0.564355	0	0	0	0	0	0	0	0	0	0	0	0	0	0	0	0	0	0	0	0	0	0	0	0	0	0	0	0	0	0	0	0	0	0	0	0	0	0	0	0	0	0
599	NODE_2497436_length_115_cov_3.05_g2480022_i0	115	CTCGGTTTCCGTCTTGGGAATGCCCGCATCGCCGCCCAGATTGAAAAATTCGGCTATCGAGTGTAGCGTTTGGTACGACGCTACCGCGTCCTCGTCTGCCGGGAGCCATTTGACA	0	0	0	0	0	0	0	0	0	0	0	0	0	0	0	0	0	0	0	0	0	0	0	0	0	0	0	0	0	0	0	0	0	0	0	0	0	0	0	0	0	0	0	0	0	0
600	NODE_2497921_length_115_cov_3.05_g2480507_i0	115	GTTTGTCGCACTGCTGGAAGAGGAAACCGCCGCATCCGCCGAAGACGAAGAGCACATGATGATCCTCGCAAGCCTGGCTGAGTTGTATGCGTGGAATGTGATACGTCCAAAACGT	0	0	0	0	0	0	0	0	0	0	0	0	0	0	0	0	0	0	0	0	0	0	0	0	0	0	0	0	0	0	0	0	0	0	0	0	0	0	0	0	0	0	0	0	0	0
601	NODE_2499550_length_115_cov_3.03333_g2482136_i0	115	ATCGAGGCCGCGACGCCTCGCCTCGCGTCTGCCTTCGGCCCCTCTTAGCCCTCAGGCGCCGCCGGGCGTTGCCCCGCAGCCACGGCCCGGGCGGCTCGCAGACGTTCACGCTCGC	0	0	0	0	0	0	0	0	0	0	0	0	0	0	0	0	0	0	0	0	0	0.767886	0	0	0	0	0	0	0	0	0	0	0	0	0	0	0	0	0	0	0	0	0	0	0	0
602	NODE_2501127_length_115_cov_3_g2483713_i0	115	GGGCAACGGCTTATAGCCGAGCTTCGGGTTTAGAACAGGTCAAGTTTGAAACTGCGGAAGGGCCATCTAGGGCGCCTGCGGCGAATGGAAGCCCCTTCGCCGCCTGACATTTCCG	0	0	0	0	0	0	0	0	0	0	0	0	0	0	0	0	0	0	0	0	0	0	0	0	0	0	0	0	0	0	0	0	0	0	0	0	0	0	0	0	0	0	0	0	0	0
603	NODE_2501202_length_115_cov_3_g2483788_i0	115	GGGGGAGAGCTCACCGGAGCCGGCGGTGGAGGGGATCTCACCGGTGGCTGTGGCGATTTGACGGGTGGCGGAGGAGAGCTCACTGGCGCCGGTGGTGGTGGAGATTTGACTGGTG	0	0	0	0	0	0	0	0	0	0	0	0	0	0	0	0	0	0	0	0	0	0	0	0	0	0	0	0	0	0	0	0	0	0	0	0	0	0	0	0	0	0	0	0	0	0
604	NODE_2512224_length_115_cov_2.65_g2494810_i0	115	CTTGCGTGTGTTCTTGGTTACATCATTTATTTATTTTTTCCTATTTCCTTCTTGCATTCTAATACATGTTGCACGATAATGCTTTAAATTATCATACTGCGTGTCAGCTTGTGGG	0	0	0	0	0	0	0	0	0	0	0	0	0	0	0	0	0	0	0	0	0	0	0	0	0	0	0	0	0	0	0	0	0	0	0	0	0	0	0	0	0	0	0	0	0	0
605	NODE_2514056_length_115_cov_2.61667_g2496642_i0	115	GGCACTGGTCTGCTGGCCGGCGGCGGCCTGCCCCGCCTCGAATAAGCGCCTGCCCCCTTGGCAGGGTCACAGCAAATACTGTATAAATGCACAGTATTTGTTGAGGAGCCTGCCA	0	0	0	0	0	0	0	0	0	0	0	0	0	0	0	0	0	0	0	0	0	0	0	0	0	0	0	0	0	0	0	0	0	0	0	0	0	0	0	0	0	0	0	0	0	0
606	NODE_2518854_length_115_cov_2.26667_g2501440_i0	115	CATCCCCTTTCCATTATTCTGCGCTTAGTGTTGACTATATCCCTCTGGAAAAAGTTATAACTAATTCAGCTTCTCCTAGTTATGGTGTTCCTACAGTTGTTAATATGGGTGAGAC	0	0	0	0	0	0	0	0	0	0	0	0	0	0	0	0	0	0	0	0	0	0	0	0	0	0	0	0	0	0	0	0	0	0	0	0	0	0	0	0	0	0	0	0	0	0
607	NODE_2520206_length_115_cov_2.2_g2502792_i0	115	CTGGGAGTGGTGTTGTGCACCCGCAATTCCAGCCACTTGGGAGACCGAGGCATTAAGAACCGCCCGAGCCCAGGAGGCAGAGGCCGCAGCAAGCCGAGATCATGACACTGCACTC	0	0	0	0	0	0	0	0	0	0	0	0	0	0	0	0	0	0	0	0	0	0	0	0	0	0	0	0	0	0	0	0	0	0	0	0	0	0	0	0	0	0	0	0	0	0
608	NODE_2521036_length_115_cov_2.16667_g2503622_i0	115	CACGGCCTTCTTCACTTGCTGGGCTCCAAATTAGCTATCCAAGATGAAACATTGTGGAGCATGAAAGCAAGACACAGCCAGGCTGAGAAACTGCTGCTCACAGAATTAGGCCGTG	0	0	0	0	0	0	0	0	0	0	0	0	0	0	0	0	0	0	0	0	0	0	0	0	0	0	0	0	0	0	0	0	0	0	0	0	0	0	0	0	0	0	0	0	0	0
609	NODE_2526225_length_114_cov_9.32203_g2508811_i0	114	GTCGGTGACCTTCACCCCGTCGGCCAGCCCGCTGGGCGCGCCCATCAGCGAGTTCGTGCTGCGCAACAGCACGGGCGGAGTGGTGGCTGACCTCACGCTGGCGCAGCTCATTGC	0	0	0	0	0	0	0	0	0	0	0	0	0	0	0	0	0	0	0	0	0	0	0	0	0	0	0	0	0	0	0	0	0	0	0	0	0	0	0	0	0	0	0	0	0	0
610	NODE_2533872_length_114_cov_4.67797_g2516458_i0	114	GGCTCGGCTTGCAGAAACATGCCATATGAGGACCCCTCTTGATGCCCAGGCCATTCGAGGATGTAAAGGCCAAATACAACAGAAACACATTGAAAGGGGGGAAGAAGATGAGGC	0	0	0	0	0	0	0	0	0	0	0	0	0	0	0	0	0	0	0	0	0	0	0	0	0	0	0	0	0	0	0	0	0	0	0	0	0	0	0	0	0	0	0	0	0	0
611	NODE_2533887_length_114_cov_4.67797_g2516473_i0	114	AGCTGCTGGTGCTGCGACCGGGCGCGAGCGTGCGACGCCGCCGCCGCCGCAAAGTCGTACGCGACCGTGGAGCCCGTGGAGCGCGGCGTGGGGCGGTCGAGCAGGCCGTAGCGC	0	0	0	0	0	0	0	0	0	0	0	0	0	0	0	0	0	0	0	0	0	0	0	0	0	0	0	0	0	0	0	0	0	0	0	0	0	0	0	0	0	1.86864	0	0	0	0
612	NODE_2533995_length_114_cov_4.67797_g2516581_i0	114	TTTGGTAATTGTGACTGCTAGTAGAATCAAGTCTTGGTTTTTTAAATTATTTTCTCCTATATATCTTGCACTAACTACAGGCTACAGTGCATCACAAACAGTCTCACATCCAGC	0	0	0	0	0	0	0	0	0	0	0	0	0	0	0	0	0	0	0	0	0	0	0	0	0	0	0	0	0	0	0	0	0	0	0	0	0	0	0	0	0	0	0	0	0	0
613	NODE_2542515_length_114_cov_3.59322_g2525101_i0	114	GGTTGTACAAGAGATTAGGATTGCTGTGTGTTTAACTGTGCACGTATAACATACACCTCAGTATTTACGCGTGCCTTTGCAGTGTTGCCGTCGCATATATAGTATGTGCATGCC	0	0	0	0	0	0	0	0	0	0	0	0	0	0	0	0	0	0	0	0	0	0	0	0	0	0	0	0	0	0	0	0	0	0	0	0	0	0	0	0	0	0	0	0	0	0
614	NODE_2549279_length_114_cov_3.11864_g2531865_i0	114	ATAATATCTGATAACAGTAGGAAACAGCTTTCTAAAGAAGACTAACTTGCCCATAAAAATAAGCAGTAACATATTTATAAACAATATATAAAAAGGACGACAAGACATGAAAAC	0	0	0	0	0	0	0	0	0	0	0	0	0	0	0	0	0	0	0	0	0	0	0	0	0	0	0	0	0	0	0	0	0	0	0	0	0	0	0	0	0	0	0	0	0	0
615	NODE_2550709_length_114_cov_3.11864_g2533295_i0	114	GGCCAGCAAAGCTAAAAGTACTACTTCACCCTCCACAGAAAATGTTCATTGGCCCATGGCCCAAAATCCGAGGGATTCAGCAGTCCCCGTCCCAGCTGCTGCACTGGGAATCTC	0	0	0	0	0	0	0	0	0	0	0	0	0	0	0	0	0	0	0	0	0	0	0	0	0	0	0	0	0	0	0	0	0	0	0	0	0	0	0	0	0	0	0	0	0	0
616	NODE_2550875_length_114_cov_3.11864_g2533461_i0	114	GTCGTCATTCCCCACTGCGATGACTCGCCATGCGATGTGACCAACGGAGGATTGTACACCATGGAAATGACCTTCACAATGCCCTACGCCTCAAGCGCCCTCACCAACGTTGCC	0	0	0	0	0	0	0	0	0	0	0	0	0	0	0	0	0	0	0	0	0	0	0	0	0	0	0	0	0	0	0	0	0	0	0	0	0	0	0	0	0	0	0	0	0	0
617	NODE_2551609_length_114_cov_3.11864_g2534195_i0	114	TAATCATCAAGTAGCAAAGACCAAAAAATAGGCAAGATATATAGGAATAGATGAGAGGAGATAGATTTGAATAACAAAGGTGCTAGAAGTGGAACAAGGGAAAGAAACACAAAG	0	0	0	0	0	0	0	0	0	0	0	0	0	0	0	0	0	0	0	0	0	0	0	0	0	0	0	0	0	0	0	0	0	0	0	0	0	0	0	0	0	0	0	0	0	0
618	NODE_2551697_length_114_cov_3.11864_g2534283_i0	114	TATTGCTGGTATGGTCAAGCCGTTGGTGAATTCAAAGGGCATAGTGAGATATAATTTTCTCTTACATATCAAAAGTGCTATTCTAAATTTGACGGATTATAATTTAGGTTGCCT	0	0	0	0	0	0	0	0	0	0	0	0	0	0	0	0	0	0	0	0	0	0	0	0	0	0	0	0	0	0	0	0	0	0	0	0	0	0	0	0	0	0	0	0	0	0
619	NODE_2551911_length_114_cov_3.11864_g2534497_i0	114	GCTCACCGTCACCGGCGGCGTGACCGTCTGGTCGGGCGGAGTGCACGTCACTGGCGGCATGACGGTCACTGCGGGCGGTATGAAGGTGCAGAGCGGAGGCATGCAACTCACCGG	0	0	0	0	0	0	0	0	0	0	0	0	0	0	0	0	0	0	0	0	0	0	0	0	0	0	0	0	0	0	0	0	0	0	0	0	0	0	0	0	0	0	0	0	0	0
620	NODE_2552643_length_114_cov_3.11864_g2535229_i0	114	TCAGATTGTTAGTAGTACATATGAGTAGCTTTTAGTGTGATGTCAAGTTTGAAGGACATGTCCTGGGTTTAATTTAAATCACAGTTTTTGATCTCACAAAAGGTTGAAGTGCAT	0	0	0	0	0	0	0	0	0	0	0	0	0	0	0	0	0	0	0	0	0	0	0	0	0	0	0	0	0	0	0	0	0	0	0	0	0	0	0	0	0	0	0	0	0	0
621	NODE_2554336_length_114_cov_3.11864_g2536922_i0	114	CTAGGGCTGTGTAGACTGACTAGGAAAAAAGAGAGAAGACTCAGGTTGTTGAGATCGAGAATTGAAGAGGGAATATCGTCGCTAATTTTACAGAGATAAGAATTATTATAAGGG	0	0	0	0	0	0	0	0	0	0	0	0	0	0	0	0	0	0	0	0	0	0	0	0	0	0	0	0	0	0	0	0	0	0	0	0	0	0	0	0	0	0	0	0	0	0
622	NODE_2554368_length_114_cov_3.11864_g2536954_i0	114	TTCCTACTGGCCGCGTTGGCAGGCCGGGCGTGGGCATCACCACGCCGCTGTTTGGCCAGCACTGGTCCACACCGGGCATGCAGGAGCTGGGCTTCGCGGTGCCCGGCTCGCCCG	0	0	0	0	0	0	0	0	0	0	0	0	0	0	0	0	0	0	0	0	0	0	0	0	0	0	0	0	0	0	0	0	0	0	0	0	0	0	0	0	0	0	0	0	0	0
623	NODE_2556237_length_114_cov_3.08475_g2538823_i0	114	CTTCAAGGATATAGACTGAATCAGTACGGATTGAATGCGAAGTAGCTTGGGTAACCAGGTGAACGTAGTTTGACCATAAGAATTAGGTAATTTTACTAATTCTACAGATCCCAG	0	0	0	0	0.589071	0	0	0	0	0	0	0	0	0	0	0	0	0	0	0	0	0	0	0	0	0	0	0	0	0	0	0	0	0	0	0	0	0	0	0	0	0	0	0	0	0
624	NODE_2556247_length_114_cov_3.08475_g2538833_i0	114	CCGTCAGGCAGGTTGAGCTGGCGGCGCTCGCCGATCTCTGTGCGCAGGCCGGGCCGCAACAGGTCGCCGCGGACGGCGAACGCGCCGACGCCGGCGATCCCGGCGGCCGCTGCG	0	0	0	0	0	0	0	0	0	0	0	0	0	0	0	0	0	0	0	0	0	0	0	0	0	0	0	0	0	0	0	0	0	0	0	0	0	0	0	0	0	0	0	0	0	0
625	NODE_2559608_length_114_cov_2.9322_g2542194_i0	114	CCGACCACGATGGAGGAAGCCGATTGCTCCGGCGAGAAGCAGCGGAACGGGCGCCGACAGCGGCGCGAGGAAGTGCTGCACGAGAGCCCCCTTTTAAGACAATGACTGTTCGGG	0	0	0	0	0	0	0	0	0	0	0	0	0	0	0	0	0	0	0	0	0	0	1.52317	0	0	0	0	0	0	0	0	0	0	0	0	0	0	0	0	0	0	0	0	0	0	0
626	NODE_2568500_length_114_cov_2.66102_g2551086_i0	114	ATGCATCATCACTTGTATCCGCTCCAATGCTCCTCACGGTACATCTTCTACGCAAATACAACGCTCTTCTACCGCTCAAATTTTACAATTTGAACCCGTGACTTCGGTTCTAGA	0	0	0	0	0	0	0	0	0	0	0	0	0	0	0	0	0	0	0	0	0	0	0	0	0	0	0	0	0	0	0	0	0	0	0	0	0	0	0	0	0	0	0	0	0	0
627	NODE_2568757_length_114_cov_2.62712_g2551343_i0	114	CGACCAACCAAGCTGTCACGGCGGCACTCATCGTCTCGGGCGACCCGATCAGCATCGCTCGCAACCAAACCACTCTCGGCAGTTTGAACGACTCAGCTACCGACACCCGCACGC	0	0	0	0	0	0	0	0	0	0	0	0	0	0	0	0	0	0	0	0	0	0	0	0	0	0	0	0	0	0	0	0	0	0	0	0	0	0	0	0	0	0	0	0	0	0
628	NODE_2569550_length_114_cov_2.52542_g2552136_i0	114	TAGTTAAGCAGAAGCCAAAAAATACAAAAATTATGAGTTACAAAAAGTTAGATAATTTTAACGCTTTAGAGTGGATTAAATATCAAAAATATTGTGACCAATTCAATAAATAAA	0	0	0	0	0	0	0	0	1.37472	0	0	0	0	0	0	0	0	0	0	0	0	0	0	0	0	0	0	0	0	0	0	0	0	0	0	0	0	0	0	0	0	0	0	0	0	0
629	NODE_2577574_length_114_cov_2.0339_g2560160_i0	114	GCCTCTGGTCCCGGATGCTCGGGGGGCTGAGGCGGGGGGATCAGCTTGGGCCCGGGAGGTTGGGGCTGCACTGAGCCGTGATCGTGCCGCTGCACTCCGGCCCGGGTGACGGAG	0	0	1.37882	0	0	0	0	0	0	0	0	0	0	0	0	0	0	0	0	0	0	0	0	0	0	0	0	0	0	0	0	0	0	0	0	0	0	0	0	0	0	0	0	0	0	0
630	NODE_2580595_length_113_cov_6.34483_g2563181_i0	113	CAGAACCTGAAAGTTGTTTGGTAGCATTCATGGACGATGGTGCACCCTTCAAGGCCTTGATCTCACGCTGCGCAGCCTCCAGCATTAGTTCTGACTGTTGCCTAACAAGCTCC	0	0	0	0	0	0	0	0	0	0	0	0	0	0	0	0	0	0	0	0	0	0	0	0	0	0	0	0	0	0	0	0	0	0	0	0	0	0	0	0	0	0	0	0	0	0
631	NODE_2584732_length_113_cov_4.75862_g2567318_i0	113	AGGTTTTTCACGAGTGACGGGCCGAAGGTTGAGCTGCCCGAAGCATGCGCAGGACTCGCCGCACTTGTTGTGACAGGCATCGTCTCAGCCGAGTACGAGTGTGCGAGACGAGG	0	0	0	0	0	0	0	0	0	0	0	0	0	0	0	0	0	0	0	0	0	0	0	0	0	0	0	0	0	0	0	0	0	0	0	0	0	0	0	0	0	0	0	0	0	0
632	NODE_2585853_length_113_cov_4.74138_g2568439_i0	113	CCCCGCAGCAGGAGGACCAGCAGCCCGGCCCAGGCGGCGCCCGTGGCGAGCAGCAGGAGGTCGAGGCCCCGCGTGGCGGCACCCGCCGGCAGGCCGGCGCGCCGCCAGAGCCC	0	0	0	0	0	0	0	0	0	0	0	0	0	0	0	0	0	0	0	0	0	0	0	0	0	0	0.812844	0	0	0	0	0	0	0	0	0	0	0	0	0	0	0	0	0	0	0
633	NODE_2585918_length_113_cov_4.74138_g2568504_i0	113	CGGCAGGACGCCGGGAAGAGCTTCAGATCCCTCCCGAGCTAGGGACGGCGATGGCGGCGGCTACGGAACTCTTCTGGTAATTTGGCTTGGGTGTTTAGGGTTTTCCCGTCGAG	0	0	0	0	0	0	0	0	0	0	0	0	0	0	0	0	0	0	0	0	0	0	0	0	0	0	0	0	0	0	0	0	0	0	0	0	0	0	0	0	0	0	0	0	0	0
634	NODE_2585927_length_113_cov_4.72414_g2568513_i0	113	CGCCTTGGGTGCTTGGGGCTTCATCGGCCGTAGCCTCCGCCCTGGTTTGCGTTGCCGCCTTGGTGGGGGCATCATCGGCCGTAGCCTCAGCCCTAACTAGTGTTGCCGCCTTG	0	0	0	0	0	0	0	0	0	0	0	0	0	0	0	0	0	0	0	0	0	0	0	0	0	0	0	0	0	0	0	0	0	0	0	0	0	0	0	0	0	0	0	0	0	0
635	NODE_2585963_length_113_cov_4.72414_g2568549_i0	113	CTCTTCCGATCTGGGGTCCTGCGCCGACAATGAACGGGACTAAGCATGATACCTAAGCGGTGGGCACAGTAATGTGCTGTAGGAGAGCGTTGCGTTTGCGGAGATCGGAAGAG	0	0	0	0	0	0	0	0	0	0	0	0	0	0	0	0	0	0	0	0	0	0	0	0	0	0	0	0	0	0	0	0	0	0	0	0	0	0	0	0	0	0	0	0	0	0
636	NODE_2591620_length_113_cov_3.96552_g2574206_i0	113	TGGATGATCCGTTAATATTCGGATACTACCTGTTTAGCGTTACCAACTTATTGGGGACGCAAGAGGCTAAACAAGCGCACTGCTGGATATGTGCGTACAAACCTGTAGCCATG	0	0	0	0	0	0	0	0	0	0	0	0	0	0	0	0	0	0	0	0	0	0	0	0	0	0	0	0	0	0	0	0	0	0	0	0	0	0	0	0	0	0	0	0	0	0
637	NODE_2594203_length_113_cov_3.51724_g2576789_i0	113	AAGTATGTGAAGAAAATGCTACCTTACAAAGATGTGTGTTTTCAAAAGGAAATGCATATCGGAGGGTTTGGCGGGGCCAGTGGGTGATACTGGAGTTGTCGGGATGGGTGATG	0	0	0	0	0	0	0	0	0	0	0	0	0	0	0	0	0	0	0	0	0	0	0	0	0	0	0	0	0	0	0	0	0	0	0	0	0	0	0	0	0	0	0	0	0	0
638	NODE_2596215_length_113_cov_3.17241_g2578801_i0	113	GTTAACAGGTCCTTTTTGGTGAGAATACCGCTTTCCGGAAGTTAAGCTCTGTTCAGTTCCTCCGGTCTGTGGGCATCCCGGGCCGAAACCCGGACACCATACACAGCCTTTGG	0	0	0	0	0	0	0	0	0	0	0	0	0	0	0	0	0	0	0	0	0	0	0	0	0	0	0	0	0	0	0	0	0	0	0	0	0	0	0	0	0	0	0	0	0	0
639	NODE_2599767_length_113_cov_3.17241_g2582353_i0	113	CCGCCACCAGACGTTTGCCGGACCTCCTCAACCACCATCAACTCATCGCCTCCAACTCTTGCTCCCCCTGCACCGCCCTCCGGGCGATCTCCCAATCACCAATCCAGTAATTC	0	0	0	0	0	0	0	0	0	0	0	0	0	0	0	0	0	0	0	0	0	0	0	0	0	0	0	0	0	0	0	0	0	0	0	0	0	0	0	0	0	0	0	0	0	0
640	NODE_2600315_length_113_cov_3.17241_g2582901_i0	113	GCCCAGTTATTTAGCTGAACTTGCCTAGCTCACTCTACAAGCGTGCTTGCTCTCCTACCCTTCTCTTTTCTCTCTCCCTCTGTAGACTTCTATGTTGCAAATCATCATTTCTG	0	0	0	0	0	0	0	0	0	0	0	0	0	0	0	0	0	0	0	0	0	0	0	0	0	0	0	0	0	0	0	0	0	0	0	0	0	0	0	0	0	0	0	0	0	0
641	NODE_2600854_length_113_cov_3.17241_g2583440_i0	113	GCCTAATGGTTTTTCTAATAAGGCTTTACATTTGGAGTATCTCTGTGTTTGAGATGTTAGGTCAGGTCAATTCCAATGACTCCCAGATTCATTCAAAAAGTCAGATCAGCAAG	0	0	0	0	0	0	0	0	0	0	0	0	0	0	0	0	0	0	0	0	0	0	0	0	0	0	0	0	0	0	0	0	0	0	0	0	0	0	0	0	0	0	0	0	0	0
642	NODE_2601701_length_113_cov_3.17241_g2584287_i0	113	TTGGAGCTGCACCCCGCAGCCCCTCTCTCTTCTACCTCTAATCTCACTTGTATTTGTCTCACAAGAACACACGCACACACACTAGCCAAGGAAGAAGAAGGCTTTGCCAATAC	0	0	0	0	0	0	0	0	0	0	0	0	0	0	0	0	0	0	0	0	0	0	0	0	0	0	0	0	0	0	0	0	0	0	0	0	0	0	0	0	0	0	0	0	0	0
643	NODE_2606863_length_113_cov_3.15517_g2589449_i0	113	GCCTCACTGTCCCGCTCCTTTATTTCTTTGTAACCCAAATTCCACTTTTCAAAGAATCAGCTCCGGTTGAGCCGCATCCAGTTGGCTTCTGATTTTGCCTAGGCAAAAGCGGT	0	0	0	0	0	0	0	0	0	0	0	0	0	0	0	0	0	0	0	0	0	0	0	0	0	0	0	0	0	0	0	0	0	0	0	0	0	0	0	0	0	0	0	0	0	0
644	NODE_2608472_length_113_cov_3.10345_g2591058_i0	113	CCCATCTGAGGGTTCGCGGGTTGTCCCCAACCCCACTACTAGCCCAGCCTGATGAAGCTTAACTTCGCAGTTCGAGATGGGATGCGGTGCTTTCTTCATAGAGATCGGAAGAG	0	0	0	0	0	0	0	0	0	0	0	0	0	0	0	0.408559	0	0	0	0	0	0	0	0	0	0	0	0	0	0	0	0	0	0	0	0	0	0	0	0	0	0	0	0	0	0
645	NODE_2619431_length_113_cov_2.68966_g2602017_i0	113	CTGGAACTGGTACCCTCCACGGGCGGAAGTGGATCGCTGGACGAAGAACCCAGTATGCCCGTCTTCACGGAGGCCTTGGTTGATGTACGTTTGTTCTTGGACGAGAACTCGAC	0	0	0	0	0	0	0	0	0	0	0	0	0	0	0	0	0	0	0	0	0	0	0	0	0	0	0	0	0	0	0	0	0	0	0	0	0	0	0	0	0	0	0	0	0	0
646	NODE_2627500_length_113_cov_2.12069_g2610086_i0	113	CTCTTCCGATCTCACGTTCGTATTCACGTTTGATACTGCGTTCGCTATTCTCTTGTGATGTTCACGGTTGCGTTCCTGTTCACGGTTGCGTTCTTGTTCCCAGATCGGAAGAG	0	0	0	0	0	0	0	0	0	0	0	0	0	0	0	0	0	0	0	0	0	0	0	0	0	0	0	0	0	0	0	0	0	0	0	0	0	0	0	0	0	0	0	0	0	0
647	NODE_2627549_length_113_cov_2.12069_g2610135_i0	113	CCTCCGCGGGCGACTCCCGCCGCGTCGTCGCGTGGTTCGCCACAGCCACTGGGCATGTCGCCGCGCAAGGGCTACCCTCGCGCCCTTGACCGCTCGGCGGCGGCTAGTGCGGG	0	0	0	0	0	0	0	0	0	0	0	0	0	0	0	0	0	0	0	0	0	0	0	0	0	0	0	0	0	0	0	0	0	0	0	0	0	0	0	0	0	0	0	0	0	0
648	NODE_2630835_length_112_cov_6.45614_g2613421_i0	112	GTAAACTGGAGGCCGAACGGCAAAATGAATGGCCGAACGACCAAAACTATGAAAAAACGGCTTAAACGTGAAACGGACACACGGGCGACGGACCGACTGGGCGGAACGGCTA	0	0	0	0	0	0	0	0	0	0	0	0	0	0	0	0	0	0	0	0	0	0	0	0	0	0	0	0	0	0	0	0	0	0	0	0	0	0	0	0	0	0	0	0	0	0
649	NODE_2630993_length_112_cov_6.4386_g2613579_i0	112	CAGTTGCCGACCACCTGCTTGATCTCGGCGTTGAAGGTCTTGTCCGGATGGGCAGCGGCAATGGCCGCGGCGTCGGCAAGGAAGGGTGGCGCCTCATCGGTTGCTCGGCCGT	0	0	0	0	0	0	0	0	0	0	0	0	0	0	0	0	0	0	0	0	0	0	0	0	0	0	0	0	0	0	0	0	0	0	0	0	0	0	0	0	0	0	0	0	0	0
650	NODE_2632402_length_112_cov_5.78947_g2614988_i0	112	GGGAGACTCAGTATTTACCTAGTAACATAAATCAAACAAACCTACTTGAGGTTCAAATGATTCTAGTTGTTGAGTACAGCGCCACTGTTAGGAGGTCACTGGTCGATAAGTC	0	0	0	0	0	0	0	0	0	0	0	0	0	0	0	0	0	0	0	0	0	0	0	0	0	0	0	0	0	0	0	0	0	0	0	0	0	0	0	0	0	1.81859	0	0	0	0
651	NODE_2634753_length_112_cov_4.84211_g2617339_i0	112	GGTGGTGCTGTGCAGACCAGCCGGAGAGACGGCAGGGGCGGGAGGAGCCACCGCGGCCATGAGGGAGGGGTTCACATTTGGCACCGTAATGTTGCCCACCTGACCGTTTCTG	0	0	0	0	0	0	0	0	0	0	0	0	0	0	0	0	0	0	0	0	0	0	0	0	0	0	0	0	0	0	0	0	0	0	0	0	0	0	0	0	0	0	0	0	0	0
652	NODE_2635318_length_112_cov_4.84211_g2617904_i0	112	GAAGCAATAGAACTCGACAATCTTGTCTCTTGAGAAAATTCAAGGACCGCGACACACGCATACACACATCAAAGCGATAGATTTTCGTCTTCGATCACCATGAGTAACCAAC	0	0	0	0	0	0	0	0	0	0	0	0	0	0	0	0	0	0	0	0	0	0	0	0	0	0	0	0	0	0	0	0	0	0	0	0	0	0	0	0	0	0	0	0	0	0
653	NODE_2639462_length_112_cov_4.36842_g2622048_i0	112	ATTTGATCAATTTCTTTCATCAAGATCAGCTCCTATTTCAGACTCCAGACATGACTTTGGCCAGAGAAACCTATTAACATCTGCCTTACCTGGGTTATTGGCTTAATTTGTG	0	0	0	0	0	0	0	0	0	0	0	0	0	0	0	0	0	0	0	0	0	0	0	0	0	0	0	0	0	0	0	0	0	0	0	0	0	0	0	0	0	0	0	0	0	0
654	NODE_2639538_length_112_cov_4.36842_g2622124_i0	112	GACGACTGTATTGAGATTCCCAATCCATTCTTACTTGATTCACCGTCCGTGTGCTCAGAAGAGGAGATTATCGAGGCTGCCCCCTTAGCCTCAAGGGGTGATCCCAAGCCCC	0	0	0	0	0	0	0	0	0	0	0	0	0	0	0	0	0	0	0	0	0	0	0	0	0	0	0	0	0	0	0	0	0	0	0	0	0	0	0	0	0	0	0	0	0	0
655	NODE_2644799_length_112_cov_3.22807_g2627385_i0	112	CTGTTCGCAAGCACTCCGACAAATAACCTCGCACATAGTTAAGTAAAATCCCTCGCAAATTTATCTCAAGGTGAATTTGCGGGGGATTTTGGTTTCATGCTTCTGCGAACAG	0	0	0	0	0	0	0	0	0	0	0	0	0	0	0	0	0	0	0	0	0	0	0	0	0	0	0	0	0	0	0	0	0	0	0	0	0	0	0	0	0	0	0	0	0	0
656	NODE_2645817_length_112_cov_3.22807_g2628403_i0	112	GTCTGATTAAGGTACGGATTGTGATGACGATAGTAAGTCAGCAGGTGGAAGCACTTGTACTGGTTACTGCAGCCTCACATACATGAATGACTGATGTAGAGTTCGGTTGGAG	0	0	0	0	0	0	0	0	0	0	0	0	0	0	0	0	0	0	0	0	0	0	0	0	0	0	0.798329	0	0	0	0	0	0	0	0	0	0	0	0	0	0	0	0	0	0	0
657	NODE_2650487_length_112_cov_3.22807_g2633073_i0	112	TGGAGGATTATAGCATTGGGGACAGAGCTGTAGTATGGACACAGTGGTGTCCGGGGGAATTGGTTCTCATCCAAGAGAATTTAGGAGGGGATGAGCCAAAACAGTCCAGGTG	0	0	0	0	0	0	0	0	0	0	0	0	0	0	0	0	0	0	0	0	0	0	0	0	0	0	0	0	0	0	0	0	0	0	0	0	0	0	0	0	0	0	0	0	0	0
658	NODE_2651912_length_112_cov_3.22807_g2634498_i0	112	GGGAACCTGTGTCGGTATTACAAACAGAGGATTTCTTGCAGACAATGAACATAATTCTCTATCTGTGATAGCACGGTACTATTAGGCAAGTGGGTCACGAGGGGAATCGGCC	0	0	0	0	0	0	0	0	0	0	0	0	0	0	0	0	0	0	0	0	0	0	0	0	0	0	0	0	0	0	0	0	0	0	0	0	0	0	0	0	0	0	0	0	0	0
659	NODE_2651935_length_112_cov_3.22807_g2634521_i0	112	GTAAAGTCGGGGGCGAAGATGCCCCGCTGGTGGTATGTACATGACGTTCTCCTCAACACGGGTGAGGGGATGGTGGATGGAGGCCGCGTCTCGGCTACGTTGCGGCAATCAG	0	0	0	0	0	0	0	0	0	0	0	0	0	0	0	0	0	1.54543	0	0	0	0	0	0	0	0	0	0	0	0	0	0	0	0	0	0	0	0	0	0	0	0	0	0	0	0
660	NODE_2652184_length_112_cov_3.22807_g2634770_i0	112	CGAAGCTGCGCGCCGCAACACCAAGCGCCGCAACTGCACGCCCCAGCTCAACGCTGCAAGGGCAAACGGTGCAGCCCAGCGCGGCACAGCAACAAACGCTGCAGCCCAGCGC	0	0	0	0	0	0	0	0	0	0	0	0	0	0	0	0	0	0	0	0	0	0	0	0	0	0	0	0	0	0	0	0	0	0	0	0	0	0	0	0	0	0	0	0	0	0
661	NODE_2652295_length_112_cov_3.22807_g2634881_i0	112	GTATCACACTAGGTAGAGGCTAGGGCACACTTTACTGTACTAGATAGTAAGTGGTTCAAACGATGTTGGTACAGGTGCATTCCGGCGGGACGATGAGCGTGCATTATGCCGA	0	0	0	0	0	0	0	0	0	0	0	0	0	0	0	0	0	0	0.621766	0	0	0	0	0	0	0	0	0	0	0	0	0	0	0	0	0	0	0	0	0	0	0	0	0	0	0
662	NODE_2652487_length_112_cov_3.22807_g2635073_i0	112	CTTTCTTCTATTCCGTGAATATTTGTTATTATGATTATTCTATCCAGCGCGATTTTGGCCTGATCTCAAAGCGTATCAGTCTTTCTTTTTTCCCGCATTGGTTACTTGGTTT	0	0	0	0	0	0	0	0	0	0	0	0	0	0	0	0	0	0	0	0	0	0	0	0	0	0	0	0	0	0	0	0	0	0	0	0	0	0	0	0	0	0	0	0	0	0
663	NODE_2652539_length_112_cov_3.22807_g2635125_i0	112	CCGGCGGCGTGTGCGAGGGCAGGCATTGTCCCCCAAAGCGCGGTGTGGCAACACTCCCGCGTGAGAGCGGACAAAATCCCGGATCGCAGCGGCGGGTCAAACCGCCGGCGAC	0	0	0	0	0	0	0	0	0	0	0	0	0	0	0	0	0	0	0	0	0	0	0	0	0	0	0	0	0	0	0	0	0	0	0	0	0	0	0	0	0	0	0	0	0	0
664	NODE_2652963_length_112_cov_3.22807_g2635549_i0	112	GTGAAGTGGCCCCTCACAGAGGCTGCATAGGCTCTGGTGCACAGCCGCTGCAACCAGTACTCCGACTAAAATCTGAGACCCAATCCTCCTAATCATCAAAGTTGAACCGAGA	0	0	0	0	1.25522	0	0	0	0	0	0	0	0	0	0	0	0	0	0	0	0	0	0	0	0	0	0	0	0	0	0	0	0	0	0	0	0	0	0	0	0	0	0	0	0	0
665	NODE_2653896_length_112_cov_3.22807_g2636482_i0	112	CTAAGCTCCACTTAGGAATTTCACTAATTAAAACCCTCACTTCACCCGGAGGAATAGGTTTACAACTAACCCGAACAACCGAACGGGATTTCTTGCCTCAACTACCGAAGAG	0	0	0	0	0	0	0	0	0	0	0	0	0	0	0	0	0	0	0	0	0	0	0	0	0	0	0	0	0	0	0	0	0	0	0	0	0	0	0	0	0	0	0	0	0	0
666	NODE_2654160_length_112_cov_3.22807_g2636746_i0	112	GTGTCACCGAGTGCCAGGCCTTTCCAGACCCTTCGTCTATACCCTCGATTTCTTACTCCGCACCGGCGTGGTAGCACCGGTACACACACTCCCACAACCCCTCGCCTGCAAC	0	0	0	0	0	0	0	0	0	0	0	0	0	0	0	0	0	0	0	1.57653	0	0	0	0	0	0	0	0	0	0	0	0	0	0	0	0	0	0	0	0	0	0	0	0	0	0
667	NODE_2654660_length_112_cov_3.22807_g2637246_i0	112	CCTTTATGTAGGGCCAGATTGAGACCGTTGGGGGCCCTAAAGCCCCACATGGTTTGGAATAAAGTGATTGCTCAATCTTAGGTTTGGGAAACTCTTGTGGGTTGGTTTTCTC	0	0	0	0	0	0	0	0	0	0	0	0	0	0	0	0	0	0	0	0	0	0	0	0	0	0	0	0	0	0	0	0	0	0	0	0	0	0	0	0	0	0	0	0	0	0
668	NODE_2654678_length_112_cov_3.22807_g2637264_i0	112	AAAACTTGGTGACCCAGAAGTAAATGCCGGTCACCAGAAAATGAACTAAAAAACTGACCAAAAGATGAATCATTGGGTTTGAGAGGAGATAGGATTCATGGGGGAAACGGGG	0	0	0	0	0	0	0	0	0	0	0	0	0	0	0	0	0	0	0	0	0	0	0	0	0	0	0	0	0	0	0	0	0	0	0	0	0	0	0	0	0	0	0	0	0	0
669	NODE_2655247_length_112_cov_3.22807_g2637833_i0	112	AAAAGTTTGGATAACCGAACTAATTGTTGAGCTAATACATGTGAAAGGGGGAGGGAGCAATCTCTTCTCAGTGGTATTCAGCAGTATAAAAAGCCTATGGATTATAGGTGAG	0	0	0	0	0	0	0	0	0	0	0	0	0	0	0	0	0	0	0	0	0	0	0	0	0	0	0.812844	0	0	0	0	0	0	0	0	0	0	0	0	0	0	0	0	0	0	0
670	NODE_2657386_length_112_cov_3.19298_g2639972_i0	112	ATCAAGAGGAGGCGGAGAACGAGCAGAGGGGGAGGGACCCCCTCCGCCGCCCCCACGCCCGTTAGGGCAGCAGCCCCGCGACGCCCTGCCGACGACCCTCGCCGAAGAGGAG	0	0	0	0	0	0	0	0	0	0	0	0	0	0	0	0	0	0	0	0	0	0	0	0	0	0	0	0	0	0	0	0	0	0	0	0	0	0	0	0	0	0	0	0	0	0
671	NODE_2657953_length_112_cov_3.15789_g2640539_i0	112	CCTGGAGGAGGCCGTTCTCGACGGAACCCGGCAGCGTCTGGCCCAGGCCGGCATTGAGGGCGAGGCCGCCACGGCAGCTGTGGCCGACGCCGGTGAGCGGGTGAGACAGGTG	0	0	0	0	0	0	0	0	0	0	0	0	0	0	0	0	0	0	0	0	0	0	0	0	0	0	0	0	0	0	0	0	0	0	0	0	0	0	0	0	0	0	0	0	0	0
672	NODE_2666831_length_112_cov_2.84211_g2649417_i0	112	GCGCGTCCAGAAAGCAAAGCGCGTACAGCGGTCGACGCAGCCCGGCAAGAAAGGCGTCTCGTCTGCAGGTAGCGGCCCTCGCAAGAAGCGATAAATTCTTTTTTCCCTTCGC	0	0	0	0	0	0	0	0	0	0	0	0	0	0	0	0	0	0	0	0	0	0	0	0	0	0	0	0	0	0	0	0	0	0	0	0	0	0	0	0	0	0	0	0	0	0
673	NODE_2668004_length_112_cov_2.73684_g2650590_i0	112	GGTTCGTGTCCGCAGTTCCACTGACTCGTCTGGAAGTGCTGCCCGCATTGCTGGCCCTAGTTGTGCAGAATCTAGAAGCACTTTGTGAGGGCTGGTTCGAGATTCAAACGGG	0	0	0	0	0	0	0	0	0	0	0	0	0	0	0	0	0	0	0	0	0	0	0	0	0	0	0	0	0	0	0	0	0	0	0	0	0	0	0	0	0	0	0	0	0	0
674	NODE_2668911_length_112_cov_2.59649_g2651497_i0	112	CGGACCCGTGGTGAGGCCGACGGACCGCACCCGGCCGGCAGATCGGAGCACGACGGACCTGCTCCTCAGGGCGACCTGAGGAGTCCTCGACGGGGCGACCCCGAGAGCTGTG	0	0	0	0	0	0	0	0	0	0	0	0	0	0	0	0	0	0	0	0	0	0	0	0	0	0	0	0	0	0	0	0	0	0	0	0	0	0	0	0	0	0	0	0	0	0
675	NODE_2669420_length_112_cov_2.50877_g2652006_i0	112	TATTACAAAGTCGAGCTAGTATTTGCAAATACAGCCGGTACGTTTCAAAGTAGATCCGAAGCGAGAATTCATTCAATAACTGCGCTATTGCTTATCGGATCCGCACTTCCTT	0	0	0	0	0	0	0	0	0	0	0	0	0	0	0	0	0	0	0	0	0	0	0	0	0	0	0	0	0	0	0	0	0	0	0	0	0	0	0	0	0	0	0	0	0	0
676	NODE_2669966_length_112_cov_2.42105_g2652552_i0	112	CCCGTCATATTTCCATATTTTCCAAGGGATGGGTGCATTAAGCAACTAAATTTTATAGTATCAGTAGTATCTGCAGTAGACCACGTTGTTGAAGTCAAGTATGCATCTCTTT	0	0	0	0	0	0	0	0	0	0	0	0	0	0	0	0	0	0	0	0	0	0	0	0	0	0	0	0	0	0	0	0	0	0	0	0	0	0	0	0	0	0	0	0	0	0
677	NODE_2678913_length_111_cov_6.57143_g2661499_i0	111	CCGAGGCGCGAGTTACCGGCGCCTCTGATGCCGATGATCCAGACGGGCTATGACCCTGATGGACGCTGTGTGCGTTACGAACGCGGAGCCGCCGTCGAGCCCGAATCTCCG	0	0	0	0	0	0	0	0	0	0	0	0	0	0	0	0	0	0	0	0	0	0	0	0	0	0	0	0	0	0	0	0	0	0	0	0	0	0	0	0	0	0	0	0	0	0
678	NODE_2682149_length_111_cov_4.92857_g2664735_i0	111	CAGTTGCCCAGCATGGCCAACCCGAAAGTCAACGACTTTAACAGTCCCTGAATAGTACCATGACGATCTCTGGCCACTTAGTAGGGCCCCACCCAGTAGACTGTTTCTGCC	0	0	0	0	0	0	0	0	0	0	0	0	0	0	0	0	0	0	0	0	0	0	0	0	0	1.99186	0	0	0	0	0	0	0	0	0	0	0	0	0	0	0	0	0	0	0	0
679	NODE_2683046_length_111_cov_4.92857_g2665632_i0	111	CTTCCACTGCTAGACGAACCGCCGGTTTCGTCGGACTTGCCCATACTTTTATGTGCACGATCAAATGTCGATAGAGCAGTGAAGATTCACGACGTTTAGTCTAAATCCAAT	0	0	0	0	0	0	0	0	0	0	0	0	0	0	0	0	0	0	0	0	0	0	0	0	0	0	0	0	0	0	0	0	0	0	0	0	0	0	0	0	0	0	0	0	0	0
680	NODE_2683329_length_111_cov_4.91071_g2665915_i0	111	ACCGTAACCGCCAACAACTTCGGTCGCGTAATTCCCAGGCGCAAAGCTTCTTCCTGTGCGGCCGCCGCCGCCTGTTCCATCATTTCACGGCCTCCCGCACTGTGTACGGTC	0	0	0	0	0	0	0	0	0	0	0	0	0	0	0	0	0	0	0	0	0	0	0	0.65623	0	0	0	0	0	0	0	0	0	0	0	0	0	0	0	0	0	0	0	0	0	0
681	NODE_2683390_length_111_cov_4.91071_g2665976_i0	111	GGCTCATTATGCACTGATCACGAAACTGATCATACACTGATTTCGTGACTGTGCATGCACTGATCACTTGGCTGATCTTGCACTGTTCATGTGGCTGATCATGCACTGATC	0	0	0	0	0	0	0	0	0	0	0	0	0	0	0	0	0	0	0	0	0	0	0	0	0	0	0	0	0	0	0	0	0	0	0	0	0	0	0	0	0	0	0	0	0	0
682	NODE_2683482_length_111_cov_4.91071_g2666068_i0	111	CTAAATAATTCGTTAAATTTAGGACACGGGTTCCGTGAGGATACCGTCGTTTTGACTTTTGTTCCGATTCTAACCGATCAGAACGAATGACCCTGGTGGGGTCCTTCTCAG	0	0	0	0	0	0	0	0	0	0	0	0	0	0	0	0	0	0	0	0	0	0	0	0	0	0	0	0	0	0	0	0	0	0	0	0	0	0	0	0	0	0	0	0	0	0
683	NODE_2689684_length_111_cov_3.875_g2672270_i0	111	CTCTTTTTTCTTTTAAAGCATTATTAATGCTTTAGCCATTTGCATTCAACATTTTGATAACTCATAAGTTTTGAAATTCGTATCAATTATCGCACTTTTCTGCGGTCTTCA	0	0	0	0	0	0	0	0	0	0	0	0	0	0	0	0	0	0	0	0	0	0	0	0	0	0	0	0	0	0	0	1.90359	0	0	0	0	0	0	0	0	0	0	0	0	0	0
684	NODE_2692759_length_111_cov_3.28571_g2675345_i0	111	TCTCGCATTAGCATGGCAATCAAGGGGTATCTCGTGTCTTACAACACCACGCTGCTCGTCGGCGCGGCGGTCATCGCGCTCGCCAGCGCTTTCCCGGCCGCTCAGGCGGTC	0	0	0	0	0	0	0	0	0	0	0	0	0	0	0	0	0	0	0	0	0	0	0	0	0	0	0	0	0	0	0	0	0	0	0	0	0	0	0	0	0	0	0	0	0	0
685	NODE_2693206_length_111_cov_3.28571_g2675792_i0	111	GTCGGAGGGAGAAGGAGGAGAGGAGGAAAAAGAATGGGGCTCTTAATATAAAATCTTCCTTGTGGTCGGTGTTTTATCCCAAAGATCTTGGGGTCGCACAGAGGGTCAAAG	0	0	0	0	0	0	0	0	0	1.51343	0	0	0	0	0	0	0	0	0	0	0	0	0	0	0	0	0	0	0	0	0	0	0	0	0	0	0	0	0	0	0	0	0	0	0	0
686	NODE_2693618_length_111_cov_3.28571_g2676204_i0	111	GCATGATGTCCAGCCAGAACGGCTCGGTTTGAATGTTGTGCATATGGGCTCCAAAGGTTTGGTGCGTACGGCGTTCGCATGTTCGGCCCGGTTGGGCCGTCGAGGGTGGCT	0	0	0	0	0	0	0	0	0	0	0	0	0	0	0	0	0	0	0	0	0	0	0	0	0	0	0	0	0	0	0	0	0	0	0	0	0	0	0	0	0	0	0	0	0	0
687	NODE_2696010_length_111_cov_3.28571_g2678596_i0	111	CATCGGTGTCGTCGAGAAGCCCTTCGAGCCCTTCGAGCCCTGGCAATCCAGCGAAGCCGGGCAGGCTGGCCAGTTCGGCGAGTTCGGGGAAATCGGTGCCTTCGCCGAGGA	0	0	0	0	0	0	0	0	0	0	0	0	0	0	0	0	0	0	0	0	0	0	0	0	0	0	0	0	0	0	0	0	0	0	0	0	0	0	0	0	0	0	0	0	0	0
688	NODE_2697832_length_111_cov_3.28571_g2680418_i0	111	GGTGGAGCAGTTTCGTAGTCATCCTCAGACGCGCATTTTGGTATATCGTACATATCTGTTTTCTTACTAAGGATTGATTCATTTATGAAGCAACGTATTACAACCGTGGCG	0	0	0	0	0	0	0	0	0	0	0	0	0	0	0	0	0	0	0	0	0	0	0	0	0	0	0	0	0	0	0	0	0	0	0	0	0	0	0	0	0	0	0	0	0	1.21478
689	NODE_2697967_length_111_cov_3.28571_g2680553_i0	111	CGGCGTTAATGTCTTCTCGTTTGTCCCATAAAGGGTCCTAAGAAAACCGCCTACTGGTTTGAACCAAGCGGTCCACGCTTTGGCTCAGCTACCCTTCTCCGTCACTCCTAC	0	0	0	0	0	0	0	0	0	0	0	0	0	0	0	0	0	0	0	0	0	0	0	0	0	0	0	0	0	0	0	0	0	0	0	0	0	0	0	0	0	0	0	0	0	0
690	NODE_2698810_length_111_cov_3.28571_g2681396_i0	111	TGCATGTAATGAATACAACATTTCTTGAGTCATTAACTATTTAAGAGAAGGCATTGCTTTCTCCTTATCACTCTTGGACAACTTGTGCCAACCTTATATTCATTACATGCA	0	0	0	0	0	0	0	0	0	0	0	0	0	0	0	0	0	0	0	0	0	0	0	0	0	0	0	0	0	0	0	0	0	0	0	0	0	0	0	0	0	0	0	0	0	0
691	NODE_2699066_length_111_cov_3.28571_g2681652_i0	111	AACTAAATAGCACGTTGAGCTGAAGGCTCCGGACTAGACGTAAGGATTGCGTCTGATGTGGTCACCAATGTCCGGTGTCGTCCTATAGGGACAGGCTAGTGGTGAAACCGC	0	0	0	0	0	0	0	0	0	0	0.637954	0	0	0	0	0	0	0	0	0	0	0	0	0	0	0	0	0	0	0	0	0	0	0	0	0	0	0	0	0	0	0	0	0	0	0
692	NODE_2700438_length_111_cov_3.28571_g2683024_i0	111	GCGAAATGGAAAGAGCCTAAAACTTAGCTGCGTGATAGCTTACAGGCGTTGTAGTTAGGTGGTTGTGGGACATTTTATGGAGTACTGTAATGCTCCGACAGAGTAAGAAAA	0	0	0	0	0	0	0	0	0	0	0	0	0	0	0	0	0	0	0	0	0	0	0	0	0	0	0	0	0	0	0	0	0	0	0	0	0	0	0	0	0	0	0	0	0	0
693	NODE_2701879_length_111_cov_3.26786_g2684465_i0	111	TGCTCGTGGTTAGTTTCCCGTTCTGGCTGAAACTGGTGTGCACTGTTTGGTCAAACCTCATTGTACATTTGAATTAGTTAGGGCGGTTCCTCTGGCTGCGAGTAGGTCAGC	0	0	0	0	0	0	0	0	0	0	0	0	0	0	0	0	1.30198	0	0	0	0	0	0	0	0	0	0	0	0	0	0	0	0	0	0	0	0	0	0	0	0	0	0	0	0	0
694	NODE_2703441_length_111_cov_3.26786_g2686027_i0	111	ATTTTATCGTCATATACGTCTAAAGCATGCAAATTTTTTGATATGTGCGCGCTGACTAAGGGGTTGGCGGCGCAGAAGCGGTTCTGGGGCGGGGTTGGGCTCTGAGTCGAG	0	0	0	0	0	0	0	0	0	0	0	0	0	1.29653	0	0	0	0	0	0	0	0	0	0	0	0	0	0	0	0	0	0	0	0	0	0	0	0	0	0	0	0	0	0	0	0
695	NODE_2703747_length_111_cov_3.26786_g2686333_i0	111	GTAGCGCGTATCTCACCCGAATCGATAAGCGATTATATTCCGCTTTATCATTCGGGGTAAGGGTGAGACTATAAAGTTTTCTAACTACATTTCTTGATGCATCACGGTCAG	0	0	0	0	0	0	0	0	0	0	0	0	0	0	0	0	0	0	0	0	0	0	0	0	0	0	0	0	0	0	0	0	0	0	1.42754	0	0	0	0	0	0	0	0	0	0	0
696	NODE_2703758_length_111_cov_3.26786_g2686344_i0	111	GGAAAACCATTAGTATTAATAAGAAAACCACAAGTCTGTTGTAACACAAGATAAGTATTACAAAAGGCAATATGTGCAGTAAGGCGGATACATTACTAAGCAAATCCAAGT	0	0	0	0	0	0	0	0	0	0	0	0	0	0	0	0	0	0	0	0	0	0	0	0	0	0	0	0	0	0	1.32775	0	0	0	0	0	0	0	0	0	0	0	0	0	0	0
697	NODE_2704497_length_111_cov_3.25_g2687083_i0	111	GGCCAAAGTGACCGGGGACTCAGGAGCTTCCTCGAGCTCCGGGAGTTGGAAGAAGGTATCGGACGCGTCCTGATCCTCTCCCCACACGTTCTGCAAGAACGGGTCTGCTTC	0	0	0	0	0	0	0	0	0	0	0	0	0	0	0	0	0	0	0	1.57653	0	0	0	0	0	0	0	0	0	0	0	0	0	0	0	0	0	0	0	0	0	0	0	0	0	0
698	NODE_2704617_length_111_cov_3.23214_g2687203_i0	111	TCTTCCGATCTCCTCTCTCCCCGCCGGCACCCTGCCCCTTCCGGACCCGTCGTCCTCCTCGCTTGCGCCCCGCCGGGGGGCCTCGCCGCGCTCTACCTTACAGATCGGAAG	0	0	0	0	0	0	0	0	0	0	0	0	0	0	0	0	0	0	0	0	0	0	0	0	0	0	0	0	0	0	0	0	0	0	0	0	0	0	0	0	0	0	0	0	0	0
699	NODE_2705517_length_111_cov_3.17857_g2688103_i0	111	ATACGGTCTGCGACATGGCGCGGGAGCCGGTCGGTCTTGCTGCGGACGGCGAGGCGGTTGCCGCGCGGGAGCGATCGGGGAATTCGGAGGCGGGGAACGGGCGGAGGGAGG	0	0	0	0	0	0	0	0	0	0	0	0	0	0	0	0	0	0	0	0	0	0	0	0	0	0	0	0	0	0	0	0	0	0	0	0	0	0	0	0	0	0	0	0	0	0
700	NODE_2716435_length_111_cov_2.46429_g2699021_i0	111	GTCGGGCGGTGCTTCAATCGCGGTGATTATCTCCTGTGCATATGTAGAAATTTCGTATGCTTTCACCAACTCCGCATGTTTAAGATGTGACTCTGTTCCACCTTCTCGAAG	0	0	0	0	0	0	0	0	0	0	0	0	0	0	0	0	0	0	0	0	0	0	0	0	0	0	0	0	0	0	0	0	0	0	0	0	0	0	0	0	0	0	0	0	0	0
701	NODE_2722322_length_111_cov_2.10714_g2704908_i0	111	TTCTGATTCGGTTGGTCCGTTTTGGAGCCTGGGATTCTGCATTTCCGATCTATTTCTAGGTGGTGTTGATGCTGCCAGTCCAGGGGCCTACTTTGAGTAGCAGGATGCGAG	0	0	0	0	0	0	0	0	0	0	0	0	0	0	0	0	0	0	0	0	0	0	0	0	0	0	0	0	0	0	0	0	0	0	0	0	0	0	0	0.526278	0	0	0	0	0	0
702	NODE_2726195_length_110_cov_6.67273_g2708781_i0	110	GTAGTACCACTTATCTTAGAATTAATAGCTTACGCTACTAACTTCATATCCCTTCTAACAGCCACGACACAAAGTCGTCAACAATAAATTAAAACCAGCAAATACTAATC	0	0	0	0	0	0	0	0	0	0	0	0	0	0	0	0	0	0	0	0	0	0	0	0	0	0	0	0	0	0	0	0	0	0	0	0	0	0	0	0	0	0	0	0	0	0
703	NODE_2728495_length_110_cov_5.01818_g2711081_i0	110	ATCGTAGCCCACTGCAGCCTCAAACCCCCGGGCCCAAGCACTCCCGCCACCTCCAGCCTCCCAAGCAGCTAGGACTGTGTCAGCCAGGCCGTGCCTGAATAGTGAGACTC	0	0	0	0	0	0	0	0	0	0	0	0	0	0	0	0	0	0	0	0	0	0	0	0	0	0	0	0	0	0	0	0	0	0	0	0	0	0	0	0	0	0	0	2.19775	0	0
704	NODE_2730435_length_110_cov_5_g2713021_i0	110	GTCTCCAGTCAACCCAACCTGAGGCGCCTCTCCGAGGTTCTCACTCATGCGCATCCGCTCCGTCGCGGGCGCCGGCGTCGTTGCCGCGCTCGCGCTCCTGTCCTCGTTCG	0	0	0	0	0	0	0	0	0	0	0	0	0	0	0	0	0	0	0	0	0	0	0	0	0	0	0	0	0	0	0	0	0.711753	0	0	0	0	0	0	0	0	0	0	0	0	0
705	NODE_2737215_length_110_cov_3.54545_g2719801_i0	110	CTGACCGTAAATACCACTGGAGGGCAATGTTGTAGAAGGAATTGTGAGGCCGGGACTGCAAGAGTGTGAGTTCACAAGTTTTTTGCTGATGACAAGTAGAAACAAGAAGA	0	0	0	0	0	0	0	0	0	0	0	0	0	0	0	0	0	0	0	0	0	0	0	0	0	0	0	0	0	0	0	0	0	0	0	0	0	0	0	0	0	0	0	0	0	0
706	NODE_2737555_length_110_cov_3.41818_g2720141_i0	110	ATTTCACTTTGTTGCCCAGGTAGGCAGCATTGTTCCCGGGTGAAAATAGACATAGCAAAATCAGTAGAGGGAGCATGGACTTTTTGGGGTTCCAGCTCCAGTTGTCCCAC	0	0	0	0	0	0	0	0	0	0	0	0	0	0	0	0	0	0.75164	0	0	0	0	0	0	0	0	0	0	0	0	0	0	0	0	0	0	0	0	0	0	0	0	0	0	0	0
707	NODE_2739957_length_110_cov_3.34545_g2722543_i0	110	GCTGTGTAGACTGGCTGGGAAAAAAGGAGAGAAGACTCAAATTGTTGAGGTCAAGGATTAGAGAGGGAATGTCATCGCTAATTTTACAGAAATGAAAATTATTATAAGGG	0	0	0	0	1.25522	0	0	0	0	0	0	0	0	0	0	0	0	0	0	0	0	0	0	0	0	0	0	0	0	0	0	0	0	0	0	0	0	0	0	0	0	0	0	0	0	0
708	NODE_2740445_length_110_cov_3.34545_g2723031_i0	110	CCGACCAGCTTAACGGACAAGCTCGCACCTGCGGGCGTACCCGCCCGGTTCTCTGTGGTGTGTCCAGGCAGCTGCCGTTGTTGTCAGACGCGTCACAAACTTTGATACAG	0	0	0	0	0	0	0	0	0	0	0	0	0	0	0	0	0	0	0	0	0	0	0	0	0	0	0	0	0	0	0	0	0	0	0	0	0	0	0	0	0	0	0	0	0	0
709	NODE_2743729_length_110_cov_3.34545_g2726315_i0	110	ATTCCATCTCTATTATGAGATACAATCCAAATAATAGTACCTGCTTTCTGGAAACATTATTTGAAATCCGCCTTCACCAAAATTATCATAACTCTGCCCAGTCTTCATAT	0	0	0	0	0	0	0	0	0	0	0	0	0	0	0	0	0	0	1.24353	0	0	0	0	0	0	0	0	0	0	0	0	0	0	0	0	0	0	0	0	0	0	0	0	0	0	0
710	NODE_2745248_length_110_cov_3.34545_g2727834_i0	110	GTGGTGATGTTGTAGCCGGTGTTCCAGAGGTCGGCGAGCGCGGTGAGCTGCTCGTTCGCGGCCGCAGGCGCTGCCGGGTCGCCGGCGGGCGTGTCGGTCAGGAACGTCGC	0	0	0	0	0	0	0	0	0	0	0	0	0	0	0	0	0	0	0	0	0	0	0	0	0	0	0	0	0	0	0	0	0	0	0	0	0	0	0	0	0	0	0	0	0	0
711	NODE_2745857_length_110_cov_3.34545_g2728443_i0	110	GTCTTGGATGCGCCCGATGTTGTGTTAGCTTATGCGTGCGGGTCGTTGTGATATTACTACGGCTTTGCGCGGCACGTTGCACCAATCATGCGTAACGTGCGGGCAACATC	0	0	0	0	0	0	0	0	0	0	0	0	0	0	0	0	0	0	0	0	0	0	0	0	0	0	0	0	0	0	0	0	0	0	0	0	0	0	0	0	0	0	0	0	0	0
712	NODE_2746387_length_110_cov_3.34545_g2728973_i0	110	GTGGCAGTGGCGTTGGAGGCAGAGTAGTAGATGGTCTGGTTCACATACTCAACGACTTTGCAGGAGCCGTCGGCATTACCAAGGTTACCGTACGAAGCTGAGAGGTTGAC	0	0	0	0	0	0	0	0	0	0	0	0	0	0	0	0	0	0	0	0	0	0	0	0	0	0	0	0	0	0	0	0	0	0	0	0	0	0	0	0	0	0	0	0	0	0
713	NODE_2749421_length_110_cov_3.34545_g2732007_i0	110	CCTGCGGCCGCCCGGCCGGTGTCGCGGGGCTCATGGCCAGCAATCATGGAGGAACCAGCGCCCGGTGTGACGGAGGATGGACCCGCTCAGTCCAGTCGGGGCAAGGTCGG	0	0	0	0	0	0	0	0	0	0	0	0	0	0	0	0	0	0	0	0	0	0	0	0	0	0	0	0	0	0	0	0	0	0	0	0	0	0	0	0	0	0	0	0	0	0
714	NODE_2750361_length_110_cov_3.34545_g2732947_i0	110	GCGGTACATTTCAACTTGAATTGAAATTAATATGTATGCAAGGGAGGCTATACTCACACCGCCATATCTGTACAAGCAGATGAACTTATGGGGGATACAGAAAAACGCGA	0	0	0	0	0	0	0	0	0	0	0	0	0	0	0	0	0	0	0	0	0	0	0	0	0	0	0	0	0	0	0	0	0	0	0	0	0	0	0	0	0	0	0	0	0	0
715	NODE_2750875_length_110_cov_3.32727_g2733461_i0	110	GCTTACCGGTCGAGTGTTTTAGCACTGATAATGATCGGAAGTAAGCCAGGCACCGAAGCAGCGGATTGGCGCAAGCCAGTGGTAGAAGAGCGTTCCATATCAGATACAAG	0	0	0	0	0	0	0	0	0	0	0	0	0	0	0	0	0	0	0	0	0	0	0	0	0	0	0	0	0	0	0	0	0	0	0	0	0	0	0	0	0	0	0	0	0	0
716	NODE_2753547_length_110_cov_3.21818_g2736133_i0	110	GCCTCATAATATTTAGCAGCTTTTCTCGCCGGTGTAGATTCATGTACTTCACTTCTCTATTCCGTTCCCCATCACAGCTCAACCTTATGGCTTGCGTACTTCAATACAAG	0	0	0	0	0	0	0	0	0	0	0	0	0	0	0	0	0	0	0	0	0	0	0	0	0	0	0	0	0	0	0	0	0	0	0	0	0	0	0	0	0	0	0	0	0	0
717	NODE_2757088_length_110_cov_3.12727_g2739674_i0	110	GCATCCTCGGGCACACACACTTCCACTCTTGGACAATCATCTCCCTCAGGTAGATCCACAAAGGGGGACCACTGGGCCAAAGGGTATATAACCCGTAATTTAATTTCTCT	0	0	0	0	0	0	0	0	0	0	0	0	0	0	0	0	0	0	0	0	0	0	0	0	0	0	0	0	0	0	0	0	0	0	0	0	0	0	0	0	0	0	0	0	0	0
718	NODE_2760328_length_110_cov_3_g2742914_i0	110	TGAAATGGCTTCCGAAGTGCCCTGGGCAACACACCTTGTACTGGAAAGAGCCTTCGTCAATTGTCAGAGAGGCATTTCTTGTGTAGGAGGGAGTTTAAGCGGAACCAGTC	0	0	0	0	0	0	0	0	0	0	0	0	0	0	0	0	0	0	0	0	0.804008	0	0	0	0	0	0	0	0	0	0	0	0	0	0	0	0	0	0	0	0	0	0	0	0	0
719	NODE_2761598_length_110_cov_2.81818_g2744184_i0	110	ATGAGTTCAACTAACAACTTCTACCAAATTCCCAACTGCAAGGCCCCTTCTTCACCCCCTTCTTCACCCCTGGCCTAGAGTTCCCCCCTGTTTAGAGGGGGGATTGAGAG	0	0	0	0	0	0	0	0	0	0	0	0	0	0	0	0	0	0	0	0	0	0	0	0	0	0	0	0	0	0	0	0	0	0	0	0	0	0	0	0	0	0	0	0	0	0
720	NODE_2761932_length_110_cov_2.76364_g2744518_i0	110	CTTCCGATCTTGTGCCAAGTGCTGGGTGTACATGCATTTCCAGCACAATTCCTGCCCTCATGGGGCTCGCATCTGAGACCAGGAGACAAGGGATAAACAAGAGATCGGAA	0	0	0	0	0	0	0	0	0	0	0	0	0	0.459678	0	0	0	0	0	0	0	0	0	0	0	0	0	0	0	0	0	0	0	0	0	0	0	0	0	0	0	0	0	0	0	0
721	NODE_2763158_length_110_cov_2.56364_g2745744_i0	110	TTCCGATCTGGTAAGGTAGAGCGCGGCGAGGCCCCGGCCGGCCGTCCGGGGGCCTCGCGAGGACGGGATCCTCGGCGCCCCACAAGCGAGGAGGACGGCGGAGATCGGAA	0.345035	0	0	0.258128	0	0.352329	0	0	0	0	0	0	0	0	0	0	0	0.379332	0	0	0	0	0	0	0	0	0	0	0	0.74571	0.639735	0	0	0	0	0	0	0	0	0	0	0	0	0	0	0
722	NODE_2773072_length_109_cov_9.44444_g2755658_i0	109	GGCGATGCCGAACGCGGCGCCGCTGAGGTCCGACAGCCGCGCGGCGAGCGCGGTGCCGATGACACCGATGCCGATGCCGAGCAGCAGTTCCAGCAGAAGCGGCCAGGTC	0	0	0	0	0	0	0	0	0	0	0	0	0	0	0	0	0	0	0	0	0	0	0	0	0	0	0	0	0	0	0	0	0	0	0	0	0	0	0	0	0	0	0	0	0	0
723	NODE_2773849_length_109_cov_6.81481_g2756435_i0	109	GTTTGCAGAAAGTTTGCGAGGTCGATAATGTCCATGTATTGATTGTAATTTTATCTCTTGGCAAAGGTAATTAGAAATCGCTAACATTGAGACAAGTGCAGTAGTTTCC	0	0	0	0	0	0	0	0	0	0	0	0	0	0	0	0	0	0	0	0	0	0	0	0	0	0	0	0	0	0	0	0	0	0	0	0	0	0	0	0	0	0	0	0	0	0
724	NODE_2774054_length_109_cov_6.81481_g2756640_i0	109	GGAAGGAGTAGTTTAAATTTTTATTTTGAACTAGACATCCAAGCTCTACAAAAATATATGTCGACATGAATGTATACTATCTTCTGTGAGTTTGCCATTGTTTGTTTTG	0	0	0	0	0	0	0	0	0	0	0	0	0	0	0	0	0	0	0	0	0	0	0	0	0	0	0	0	0	0	0	0	0	0	0	0	0	0	0	0	0	0	0	0	0	0
725	NODE_2776494_length_109_cov_5.11111_g2759080_i0	109	GGAATAGAGAGGGTGAATAACTCCAAAAGGCAAAAACAAGATCGTTGGGAACACGGAACAGTGGAACACAACCTCCCACATCTAGACCACTTGCATTACAGAAAATATT	0	0	0	0	0	0	0	0	0	0	0	0	0	0	0	0	0	0	0	0	0	0	0	0	0	0	0	0	0	0	0	0	0	0	0	0	0	0	0	0	0	0	0	0	0	0
726	NODE_2777245_length_109_cov_5.11111_g2759831_i0	109	ATTTATTACTATTCTTTCAAGGATGGGACGGTATTTCTTAAAGTGAATTTAGAATCAATACGCCCCTGGTTTGCGTTGGCAGTCCTTTTAATAAGAAAAGATAACTCTT	0	0	0	0	0	0	0	0	0	0	0	0	0	0	0	0	0	0	0	0	0	0	0	0	0	0	0	0	0	0	0	0	0	0	0	0	0	0	0	0	0	1.86864	0	0	0	0
727	NODE_2778301_length_109_cov_5.03704_g2760887_i0	109	GTCCAGCACGGAGGATGCATTTTGCGCATAATTTTTAACGACTATGCACCTCACTCTCGGAGGCGATCTTTTCACTGCACTAATTGTTGCCCGTGTGCACTTATCGGTG	0	0	0	0	0	0	0	0	0	0	0	0	0	0	0	0	0	0	0	0	0	0	0	0	0	0	0	0	0	0	0	0	0	0	0	0	0	0	0	0	0	0	0	0	0	0
728	NODE_2783896_length_109_cov_3.61111_g2766482_i0	109	GGCAGGAGTGTTCCTCTCGTACTAACTCATGCAGCCAAATACACCTTCTGCGTGGAGAGCATTTTATCAGAAAGGGCCCAGCTAACCCTTGCTTCCACCATCTGCGGAT	0	0	0	0	0	0	0	0	0	0	0	0	0	0	0	0	0	0	0	0	0	0	0	0	0	0	0	0	0	0	0	0	0	0	0	0	0	0	0	0	0	0	0	0	0	0
729	NODE_2786846_length_109_cov_3.40741_g2769432_i0	109	GCTCGTCACAAGCTCTTCGTCTCGCTCTGCTACCTCACCAGCGCTTGCGCAAAGAAAACCTACCTCCTCCCTCCAGACCCGCCAGTTCAGCCTAACATCCCGCTTTAAT	0	0	0	0	0	0	0	0	0	0	0	0	0	0	0	0	0	0	0	0	0	0	0	0	0	0	0.812844	0	0	0	0	0	0	0	0	0	0	0	0	0	0	0	0	0	0	0
730	NODE_2787503_length_109_cov_3.40741_g2770089_i0	109	GGGTCCGCCACGGCTCGCTCCTCAGGGGTGGGCGCGGCACTGTGGGTGTGTTCAGCCCACGTCAGTACCAGCTCCGCGCCGCGGAGCCGCCCCGGAACCTCCGTCCGGG	0	0	0	0	0	0	0	0	0	0	0	0	0	0	0	0	0	0	0	0	0	0	0	0	0	0	0	0	0	0	0	0	0	0	0	0	0	0	0	0	0	0	0	0	0	0
731	NODE_2791930_length_109_cov_3.40741_g2774516_i0	109	CCCTTTTCCATTCAAGTGGTTTGCAAAAGATTCTGCCAACCTTCTCGGATATTGTCGAGCTCTTCTCAAGAGCCCTCCACCTCAAATATTGCTATTATCTTTGATTTCC	0	0	0	0	0	0	0	0	0	0	0	0	0	0	0	0	0	0	0	0	0	0	0	0	0	0	0	0	0	0	0	0	0	0	0	0	0	0	0	0	0	0	0	0	0	0
732	NODE_2793215_length_109_cov_3.40741_g2775801_i0	109	GCCAACACCAGGAAATACTCCCATCACAGCAGCACCAGTCACCACCCTTCCAGTCTCTGCTACTCCAAGCAGCACTGGGCTGCCTTTGACACCAATCACTCCAGCACCC	0	0	0	0	0	0	0	0	0	0	0	0	0	0	0	0	0	0	0	0	0.804008	0	0	0	0	0	0	0	0	0	0	0	0	0	0	0	0	0	0	0	0	0	0	0	0	0
733	NODE_2793543_length_109_cov_3.40741_g2776129_i0	109	GCCTTGGTAAATCAACTGGGTAAACTTGTGGCGCGGAAATCAAGTATGTCTACCCAGAGGATCGAAATTCTGGAGGGTGTACCTCATAGCCTTGAAACCGAGGGTGTAA	0	0	0	0	0	0	0	0	0	0	0	0	0	0	0	0	0	0	0	0	0	0	0	0	0	0	0	0	0	0	0	0	0	0	0	0	0	0	0	0	0	0	0	0	0	0
734	NODE_2794895_length_109_cov_3.40741_g2777481_i0	109	ATTCTCAGTGTCATTGAAGCATGGAACCACAGTGAGTTTTCTAGGTTTCAGGTTAAGGGCATGACACCCGAAGAACAGTTCACTCGCATCATGGAACACACGAATGAGG	0	0	0	0	0	0	0	0	0	0	0	0	0	0	0	0	0	0	0	0	0	0	0	0	0	0	0	0	0	0	0	0	0	0	0	0	0	0	0	0	0	0	0	0	0	0
735	NODE_2796062_length_109_cov_3.40741_g2778648_i0	109	ACCAACCATACCATGACCAATTACAACGATTTTCATGTCATTTTTCCTTTATGTATGGTTCAGATTAAGCAACTTGCTGTTTGTTAAAATCACTGTTTGTCCGAATGGC	0	0	0	0	0	0	0	0	0	0	0	0	0	0	0	0	0	0	0	0	0	0	0	0	0	0	0	0	0	0	0	0	0	0	0	0	0	0	0	0	0	0	0	0	0	0
736	NODE_2796301_length_109_cov_3.40741_g2778887_i0	109	CTTCTGAAAAAGTTATTGAAATAGAGCCAAAATCACGCAATCCACAAGTGAGCAAGAAAATATCAATCATAGTTCCCGCTCTGCAAGGAGCGCCCAAGGGGCTCGGCCG	0	0	0	0	0	0	0	0	0	0	0	0	0	0	0	0	0	0	0	0	0	0	0	0	0	0	0	0	0	0	0	0	0	0	0	0	0	0	0	0	0	0	0	0	0	0
737	NODE_2799264_length_109_cov_3.31481_g2781850_i0	109	GTCCTCGGCGCGGGCCACGTCCGTCGCCGACAGCAGCAGCACCGCCAGCAGGAGGACGGCCCCCGCCGCCGCCGTGCCGCCGCGCATGGTCGTCGCCATCGAAAAGATC	0	0	0	0	0	0	0	0	0	0	0	0	0	0	0	0	0	0	0	0	0	0	0	0	0	0	0	0	0	0	0	0	0	0	0	0	0	0	0	0	0	0	0	0	0	0
738	NODE_2799265_length_109_cov_3.31481_g2781851_i0	109	ATTGTCTCACAGGACGATACCTTGTGGCTAATTTTTAAGGCTGCTAAATCAAAGTAAGTTCATTGGAGGAGAGAGCTTTGTTGACCTTTCAGGGAGGTCTCTGTCACGG	0	0	0	0	0	0	0	0	0	0	0	0	0	0	0	0	0	0	0	0	0	0	0	0	0	0	0	0	0	0	0	0	0	0	0	0	0	0	0	0	0	0	0	0	0	0
739	NODE_2805191_length_109_cov_3.03704_g2787777_i0	109	AATGCCGAGAATGCGCCGCATGAACCCCGTTGCCGCCCCGCCCCAGCGCCGTGCGCCGGCCGGCCCCAAGGCCGAGCAGCGGGTGCGCGACATCCTGCGCGTCGGCCGC	0	0	0	0	0	0	0	0	0	0	0	0	0	0	0	0	0	0	0	0	0	0	0	0	0	0	0	0	0	0	0	0	0	0	0	0	0	0	0	0	0	0	0	0	0	0
740	NODE_2805326_length_109_cov_3_g2787912_i0	109	GGAGTGCCTTCCAAAATAAGCTAGGCACAGAGAAACTGGTGCCGCATGGTCTTGCTTCCATGTGAGATCTAGAACGGTTGAACTCGTGGAGGTAGAGAGTGGAAGGGTG	0	0	0	0	0	0	0	0	0	0	0	0	0	0	0	0	0	0	0	0	0	0	0	0	0	0	0	0	0	0	0	0	0	0	0	0	0	0	0	0	0	0	0	0	0	0
741	NODE_2807458_length_109_cov_2.59259_g2790044_i0	109	ATGGGGCAACTAACACCTAACTTGAACCAAGACCACGGGTCTTTGTCTCCATCCCTAGAAGAGGTAATTGCTGCCTGCTGTACCCCTCGTGCAGCTCAACCTGCCACAT	0	0	0	0	0	0	0	0	0	0	0	0	0	0	0	0	0	0	0	0	0	0	0	0	0	0	0	0	0	0	0	0	0	0	0	0	0	0	0	0	0	0	0	0	0	0
742	NODE_2807712_length_109_cov_2.55556_g2790298_i0	109	CTCCCTTTCGAAGAGCCCCTCTCCCCGGCTCTCTTTGCTGCCCTCTAAGTTGCCTCCAAGACTCTGGACCAAGACTCTGGACCCGAGACCCCGACAAACTGAGTCTCCC	0	0	0	0	0	0	0	0	0	0	0	0	0	0	0	0	0	0	1.24353	0	0	0	0	0	0	0	0	0	0	0	0	0	0	0	0	0	0	0	0	0	0	0	0	0	0	0
743	NODE_2807872_length_109_cov_2.55556_g2790458_i0	109	GCCGAATATGTCTATAGTGTGATAAATGATATCACGGTAGGGTCTTTAATTGTGTAGAGTAAGTTCGAACAAAGGGTTTGTTATGAGGGGGAGGCGGGCTCTCTAGTCG	0	0	0	0	0	0	0	0	1.58912	0	0	0	0	0	0	0	0	0	0	0	0	0	0	0	0	0	0	0	0	0	0	0	0	0	0	0	0	0	0	0	0	0	0	0	0	0
744	NODE_2812568_length_109_cov_2.2963_g2795154_i0	109	AACTGCTTTACTATGCATAGAAATGTGATAACTTGCTAGCTCATCAGTAATGTTACACAGCTGAGCACCACGAGCTGTTATGGGCAGCTTCCTGCATTTTAAAGCAGTT	0	0	0	0	0	0	0	0	0	0	0	0	0	0	0	0	0	0	0	0	0	0	0	0	0	0	0	0	0	0	0	0	0	0	0	0	0	0	0	0	0	0	0	0	0	0
745	NODE_2819937_length_108_cov_5.4717_g2802523_i0	108	CCGATCTGGAATGGAAAAAGAGGATCAGAGGTTAAACTTTGAAGACTGGTTTCTGTTAACAAATACACGCTCTATTAGACCATGAATCGCGAGGATGGAAGAGATCGG	0	0	0	0	0	0	0	0	0	0	0	0	0	0	0	0	0	0	0	0.5839	0	0	0	0	0	0	0	0	0	0	0	0	0	0	0	0	0	0	0	0	0	0	0	0	0	0
746	NODE_2821448_length_108_cov_5.20755_g2804034_i0	108	CACAAACCTTTGATATCGCTCAACTACTTTTCGGGCGGGCTCTCAGATTCCTGGTGCTTTTACTGGCGGCCCGATACCAACAGGCGTGATTTACATCGGTGAAGTTTG	0	0	0	0	0	0	0	0	0	0	0	0	0	0	0	0	0	0	0	0	0	0	0	0	0	0	0	0	0	0	0	0	0	0	0	0	0	0	0	0	0	0	0	0	0	0
747	NODE_2827357_length_108_cov_3.66038_g2809943_i0	108	CCGATCTCGGGTGAGGAGGAGGAGAAAAAAGAGGATCAGAAAGAATAACTGTTGGGTGCTGGACTCAGTGCCTGGGTGACAAAATGGTTGGTACAACAAACAGATCGG	0	0	0	0	0	0	0	0	0	0	0	0	0	0	0	0	0	0	0	0	0	0	0	0	0	0	0	0	0	0	0	0	0	0	0	0	0	0	0	0	0	0	0	0	0	0
748	NODE_2828174_length_108_cov_3.4717_g2810760_i0	108	CACTTTTAGTGTGCGCGTTAGGAGAGCGTTCCTAGGCGAGTGAAGCGGCGGCGTAAGCCAGCCGTGGACGCCTTGGAAGTGAGAATGCCGGCATGAGTAATGAAAGAG	0	0	0	0	0	0	0	0	0	0	0	0	0	0	0	0	0	0	0	0	0	0	0	0	0	0	0	0	0	0	0	0	0	0	0	0	0	0	0	0	0	0	0	0	0	0
749	NODE_2830494_length_108_cov_3.4717_g2813080_i0	108	CTCAAATTCGTTAAAACAACCTTAACCCTAATGCAGTCTACCTTCCCTTGTGTCATTCTTGACACCTACGGATTCTTGTCGTACTAAGTTGATAGATCTAGAGCCAGC	0	0	0	0	0	0	0	0	0	0	0	0	0	0	0	0	0	0	0	0	0	0	0	0	0	0	0	0	0	0	0	0	0	0	0	0	0	0	0	0	0	0	0	0	0	0
750	NODE_2832500_length_108_cov_3.4717_g2815086_i0	108	AAAATTTTGAACTCAAAATGGAAGTTGGAAAATGAGAGTTTTGGCATAAATGCAAATTTCCTTTGATGGTGAACACATGTATGATCCTGGAGAATTTTCCCATAGCTG	0	0	0	0	0	0	0	0	0	0	0	0	0	0	0	0	0	0	0	0	0	0	0	0	0	0	0	0	0	0	0	0	0	0	0	0	0	0	0	0	0	0	0	0	0	0
751	NODE_2832504_length_108_cov_3.4717_g2815090_i0	108	GAAGTGGGCAGAATCTCTTGTAAGCCCTACCCATGCAGAAGGCCGAGCTAATGTTGTAAGTGCCGCAACACTTAGCTTAAAATATACGAGAAATTCCTACAAAAGATT	0	0	0	0	0	0	0	0	0	0	0	0	0	0	0	0	0	0	0	0	0	0	0	0	0	0	0	0	0	0	0	0	0	0	0	0	0	0	0	0	0	0	0	0	0	0
752	NODE_2832941_length_108_cov_3.4717_g2815527_i0	108	GAGAAACAAGAGAGGATTAGTAATAAATCAATTAATTCTTTCATCAAAGGATCCATATAATTTGTCCTTGATATCCATAATGCTCAAATGCCAAGAACAAGATAACAG	0	0	0	0	0	0	0	0	0	0	0	0	0	0	0	0	0	0	0	0	0	0	0	0	0	0	0	0	0	0	0	0	0	0	0	0	0	1.49414	0	0	0	0	0	0	0	0
753	NODE_2836127_length_108_cov_3.4717_g2818713_i0	108	GTTAAATAGAAGAGGTATGTTGACAGTTGTTGAATGACGTTTCTGATGACGTCATTTATGCTGATGCTTCCGCTACCACAGCAACCAATCTAAACACATGGTTTTCAT	0	0	0	0	0	0	0	0	0	0	0	0	0	0	0	0	0	0	0	0	0	0	0	0	0	0	0	0	0	0	0	0	0	0	0	0	0	0	0	0	0	1.24576	0	0	0	0
754	NODE_2836248_length_108_cov_3.4717_g2818834_i0	108	GTCCAGTCCCTGAGCAGCCCCCTGGCTCTCTAGCCCTGCCAGTTCCAGGTGTGGTTGTCGTCAGGGGGTGTCAGATTGTGGTGGAAACAGTGGCTACGACCGAGCGGG	0	0	0	0	0	0	0	0	0	0	0	0	0	0	0	0	0	0	0	0	0	0	0	0	0	0	0	0	0	0	0	0	0	0	0	0	0	0	0	0	0	0	0	0	0	0
755	NODE_2836408_length_108_cov_3.4717_g2818994_i0	108	CCTTACTCAGGTACCCGTGTCACACGTCAGAAAAGAGTTAGCCTACGGGGCTCTCACCCGCTCCGGCGGACAGTTCCAGGTCGCTTCGACTCCCCTCTCCTGATCGTG	0	0	0	0	0	0	0	0	0	0	0	0	0	0	0	0	0	0	0	0	0	0	0	0	0	0	0	0	0	0	0	0	0	0	0	0	0	0	0	0	0	0	0	0	0	0
756	NODE_2837025_length_108_cov_3.4717_g2819611_i0	108	GGACCCCTCGACCTTCCTGGGTCGCCAGAAGCACGACAAGAAGCTGTGGTCCGAGCAGTACCACCAGAAGCAGATCGCTCTGCCCGGTAAGTTCACGTTCCCCATGGC	0	0	0	0	0	0	0	0	0	0	0	0	0	0	0	0	0	0	0	0	0	0	0	0	0	0	0	0	0	0	0	0	0	0	0	0	0	0	0	0	0	0	0	0	0	0
757	NODE_2838586_length_108_cov_3.4717_g2821172_i0	108	CAGGAATTCTCGTTGAGGTTTGAGCATTCTACTGGCGTGCGGTTGCCTTGCTCTTAACAGTAGCGCTTTGCGATCAAGTTCTTCTAGAACTAGATCAGATTTTGTGCG	0	0	0	0	0	0	0	0	0	0	0	0	0	0	0	0	0	0	0	0	0	0	0	0	0	0	0	0	0	0	0	0	0	0	0	0	0	0	0	0	0	0	0	0	0	0
758	NODE_2840994_length_108_cov_3.4717_g2823580_i0	108	GGGTCGAGTGCTGCGGGTTCGCCTCGACCTGCGCCTCCCAGCGGGTGGCTCGCCGGGCCGGCGTGCCGCTCGCCCGGTCCGGGCCGCCGGTGTCGTCCGCGCTCATCG	0	0	0	0	0	0	0	0	1.37472	0	0	0	0	0	0	0	0	0	0	0	0	0	0	0	0	0	0	0	0	0	0	0	0	0	0	0	0	0	0	0	0	0	0	0	0	0
759	NODE_2841689_length_108_cov_3.45283_g2824275_i0	108	CGCTCCCGCAGCGGCCGCCTCCAGGATCCTTTCGACCACATGCGCCGGCTGCTGGATCAGGACAGCCGCGAGGCCGCCGGCAGCAAGGGCGATCACGAGCGCATCGGG	0	0	0	0	0	0	0	0	0	0	0	0	0	0	0	0	0	0	0	0	0	0	0	0	0	0	0	0	0	0	0	0	0	0	0	0	0	0	0	0	0	0	0	0	0	0
760	NODE_2848291_length_108_cov_3.15094_g2830877_i0	108	CTTCATACACATAATTAGACTCAAGGTCAGATGACTCTCCAGTTCCATCAGGAGAGTAGTTGGTCAAACAGAAAAGAACGGCTGAATCAAAACAAGGACAAGGGCATG	0	0	0	0	0	0	0	0	0	0	0	0	0	0	0	0	0	0	0	0	0	0	0	0	0	0	0	0	0	0	0	0	0	0	0	0	0	0	0	0	0	0	0	0	0	0
761	NODE_2848748_length_108_cov_3.0566_g2831334_i0	108	GGTCACTAGGGAGTATTTAGGCTTAGAGAGTGGTCTCTCCAGATTCCACGAGATTTCACGGGCCACGTGCTACTTGGGATACCTCTCGGGAGGTCACGTCATTTCGTC	0	0	0	0	0	0	0	0	0	0	0	0	0	0	0	0	0	0	0	0	0	0	0	0	0	0	0	0	0	0	0	0	0	0	0	0	0	0	0	0	0	0	0	0	0	0
762	NODE_2848957_length_108_cov_3.01887_g2831543_i0	108	GCTGTGTAGACTGGCTAAGAAAAAGGAGAGAGGACTCAAATTGTTGGAATCGAGAATTAAGGAGGGAATATCGTCACTGATTTTGCAGAAATAAAAATTATTATAAGG	0	0	0	0	0	0	0	0	0	0	0	0	0	0	0	0	0	0	0	0	0	0	0	0	0	0	0	0	0	0	0	0	0	0	0	0	0	0	0	0	0	0	0	0	0	0
763	NODE_2850801_length_108_cov_2.66038_g2833387_i0	108	CTTATACTTGACCGTTAAGATAAAAATGCAAAATCTTAACGAGTAGGAGGACGTATTGATAGTATTGAAGGTTTACTGTAAAGTTGACTGAAACTATCTTTAGTGCAG	0	0	0	0	0	0	0	0	0	0	0	0	0	0	0	0	0	0	0	0	0	0	0	0	0	0	0	0	0	0	0	0	0	0	0	0	0	0	0	0	0	0	0	0	0	0
764	NODE_2855368_length_108_cov_2.45283_g2837954_i0	108	GGGGGATGTAAATTGTAGTGCTACTCACGTTACTCCACGGAGACCGCGGGGATGCCAGCTTTGGCTAGTGTAGTGGTCCCACCTATTGATTGGAGTCAAAAGTAAAGC	0	0	0	0	0	0	0	0	0	0	0	0	0	0	0	0	0	0	0	0	0	0	0	0	0	0	0	0	0	0	0	0	0	0	0	0	0	0	0	0	0	0	0	0	0	0
765	NODE_2856314_length_108_cov_2.32075_g2838900_i0	108	GTTCATTTTGATACGTCTCTTTTTTAACGTTGAGCTACAATGGTACCCAATCTCCTCGGTGCATTCACCAATCATCTCTCCTACCTTTACCATGCTTGCAGCGGTCTG	0	0	0	0	1.21454	0	0	0	0	0	0	0	0	0	0	0	0	0	0	0	0	0	0	0	0	0	0	0	0	0	0	0	0	0	0	0	0	0	0	0	0	0	0	0	0	0
766	NODE_2856591_length_108_cov_2.26415_g2839177_i0	108	ACCGGACTTGGTGAACACAAAGAGATTAATTGCAAGTGTGTTTGGAATATGATTGCAGAAAGTAAAGAAAGTAATATTGCAAGAGAACAGTAATGATGCTAAGATGGT	0	0	0	0	0	0	0	0	0	0	0	0	0	0	0	0	0	0	0	0	0	0	0	0	0	0	0	0	0	0	0	0	0	0	0	0	0	0	0	0	0	0	0	0	0	0
767	NODE_2857299_length_108_cov_2.15094_g2839885_i0	108	ATCTAACGAAAGCTCCCAAAGAGCTACGACAACTATCTCAGATCTCATAGAGAAGGGAAATAATACGTTCGCAAATATACGAAAGATATCTATTCTGCCACTCTACGG	0	0	0	0	0	0	0	0	0	0	0	0	0	0	0	0	0	0	0	0	0	0	0	0	0	0	0	0	0	0	0	0	0	0	0	0	0	0	0	0	0	0	0	0	0	0
768	NODE_2861435_length_107_cov_7.07692_g2844021_i0	107	CGCTACTTGGCTGTTTGATAGATGCTAAAGGAATCCAAGATAAAATATAAACTAGTTGTGTCCGTTGTTTTTGAGCGTCGTCTATTTTATGGTGCGCTTGGTAGATG	0	0	0	0	0	0	0	0	0	0	0	0	0	0	0	0	0	0	0	0	0	0	0	0	0	0	0	0	0	0	0	0	0	0	0	0	0	0	0	0	0	0	0	0	0	0
769	NODE_2862617_length_107_cov_5.61538_g2845203_i0	107	GGTGTTTTAGCTCTAGCTCGATTGCCGCATTCTGATGTGGAAAGCATCATCGATGGCTGATGATTCCGGTTCATATGTACGAGTCATTTGTCTCGAATAAAAAGGGG	0	0	0	0	0	0	0	0	0	0	0	0	0	0	0	0	0	0	0	0	0	0	0	0	0	0	0	0	0	0	0	0	0	0	0	0	0	0	0	0	0	0	0	0	0	0
770	NODE_2864560_length_107_cov_5.30769_g2847146_i0	107	CTCTCTGATACTCCATTCCAGGAGACTTCTCCCTAGGACTTGCATTGGTATGACCCTTTCACAATACAACTTGAATACCCCATTCCTTTGGATACCCAATTTTCATT	0	0	0	0	0	0	0	0	0	0	0	0	0	0	0	0	0	0	0	0	0	0	0	0	0	0	0	0	0	0	0	0	0	0	0	0	0	0	0	0	0	0	0	0	0	0
771	NODE_2864950_length_107_cov_5.26923_g2847536_i0	107	AACCCCCGGGAAACACTTCCACACCACCAGCAAACATCCCGACTAGTCAAAGTGAGGCCCGCCACCAAAAGGAAGCCAGGATTCATCCACCCCTACCACGACCCCCC	0	0	0	0	0	0	0	0	0	0	0	0	0	0	0	0	0	0	0	0	0	0	0	0	0	0	0	0	0	0	0	0	0	0	0	0	0	0	0	0	0	0	0	0	0	0
772	NODE_2866812_length_107_cov_4.86538_g2849398_i0	107	GCGAGAGAAGCGGGTCCAGGACCGAGACCGAGGCTTGGAAGGTTGCAGCGCTCTTCGGAGCGCAGCGCATTCGAAGCGGAGGCGAGGACCAGGACCGTCGGAGCCGG	0	0	0	0	0	0	0	0	0	0	0	0	0	0	0	0	0	0	0	0	0	0	0	0	0	0	0	0	0	0	0	0	0	0	0	0	0	0	0	0	0	0	0	0	0	0
773	NODE_2866874_length_107_cov_4.84615_g2849460_i0	107	CCTGACTCTATTAAGGGTACAGAGGATTGACTGGGCATGGTGGTGGACAGCTGTGGTCTCGGGAGGCTGAGGCGGGAGGGCCGCTTGGGCCTGGGGGGTGGAGGCTG	0	0	0	0	0	0	0	0	0	0	0	0	0	0	0	0	0	0	0	0	0	0	0	0	0	0	0	0	0	0	0	0	0	0	0	0	0	0	0	0	0	0	0	2.19775	0	0
774	NODE_2866896_length_107_cov_4.82692_g2849482_i0	107	GGGGCAGGCCACACAAAAGGAGGAACATTGGTGCCTGGACATTCACCCAAAGAGATTCAACCGAAGAGGAGGCCCAGGAGGCTGCCAAGGAGAGAGGACTGTTGGAC	0	0	0	0	0	0	0	0	0	0	0	0	0	0	0	0	0	0	0	0	0	0	0	0	0	0	0	0	0	0	0	0	0	0	0	0	0	0	0	0	0	0	0	0	0	0
775	NODE_2870104_length_107_cov_3.53846_g2852690_i0	107	CTCCTAACATAGACAACCCTTTCTTCAAGGAAACCACTTTCAAGACACTGAGGTCCTGGAGCCCCCCTAAGCCCCTGCCAGGACGGCAGTCACCGTTTATGGGCAAC	0	0	0	0	0	0	0	0	0	0	0	0	0	0	0	0	0	0	0	0	0	0	0	0	0	0	0	0	0	0	0	0	0	0	0	0	0	0	0	0	0	0	0	0	0	0
776	NODE_2870421_length_107_cov_3.53846_g2853007_i0	107	CCGCGACCTCGAGGCTTGCCGCCGCGCGGTTCACAGTGGGGTGTGAGCCTATCAGAACGAAATGCAGAAGCGGCAAGGCGAAGTCACACCTCCTAGAAGAAAACAAA	0	0	0	0	0	0	0	0	0	0	0	0	0	0	0	0	0	0	0	0	0	0	0	0	0	0	0	0	0	0	0	0	0	0	0	0	0	0	0	0	0	1.24576	0	0	0	0
777	NODE_2870904_length_107_cov_3.53846_g2853490_i0	107	GCAGCACGACATGATCTGTCTGTCCTGCAACCGCATCGTTACCTACCTACTGGGCCACGTGTCGGCCAACATCAAGTCCATCACTCTCCAGGTCATCTTCGACCCCC	0	0	0	0	0	0	0	0	0	0	0	0	0	0	0	0	0	0	0	0	0	0	0	0	0	0	0	0	0	0	0	0	0	0	0	0	0	0	0	0	0	1.24576	0	0	0	0
778	NODE_2870979_length_107_cov_3.53846_g2853565_i0	107	GTGATATTTGAAGTAAGTTACTTAAGGAATCTCGGTGGCTATATGTCGGTTTTCAGTTTCGAGCAGAGTAAACTCTACTCAAATCTCGGTGGCTGGATGTCGGTTTT	0	0	0	0	0	0	0	0	0	0	0	0	0	0	0	0	0	0	0	0	0	0	0	0	0	0	0	0	0	0	0	0	0	0	0	0	0	0	0	0	0	0	0	0	0	0
779	NODE_2871996_length_107_cov_3.53846_g2854582_i0	107	GCAAGTCACCGACCTCAAGAATATGATGCAACAGGAATTTTCCCTTTTGGGTCAACTGGTCAACATTTATGACTCGTCAAACAGGGCTACCTGGAAATGTACACAAC	0	0	0	0	0	0	0	0	0	0	0	0	0	0	0	0	0	0	1.24353	0	0	0	0	0	0	0	0	0	0	0	0	0	0	0	0	0	0	0	0	0	0	0	0	0	0	0
780	NODE_2872504_length_107_cov_3.53846_g2855090_i0	107	CTTTCGAGCAAAGTAGTACTGGGGGTCCGCGGTTTCTTGTCAACTATTTAACACCAAACAAGCATCTGTCACTCGTCCAGCCTGGGCTCCAGCTTTCGCTATTCTAC	0	0	0	0	0	0	0	0	0	0	0	0	0	0	0	0	0	0	0	0	0	0	0	0	0	0	0	0	0	0	0	0	0	0	0	0	0	0	0	0	0	0	0	0	0	0
781	NODE_2874749_length_107_cov_3.53846_g2857335_i0	107	CGATCTGGGGTGCCGGTTCAAGGTGCCAGAATGTAGCTGGTTCTGAGGGGTCAAAAGATCACTTCCTTCGGGAGTGATGGACACTTATTCCATGATTGAACAGATCG	0	0	0	0	0	0	0	0	0	0	0	0	0	0	0	0	0	0	0	0	0	0	0	0	0	0	0	0	0	0	0	0	0	0	0.453611	0	0	0	0	0	0	0	0	0	0	0
782	NODE_2876396_length_107_cov_3.53846_g2858982_i0	107	CTGGAGAAGGTGCACGTGGAGGCCCGCGGTCGTCTTAGTGGCCATTTCTCTACCACAAACCTGCTCTATCAGTATTCTTTCCAAGATGTCTGGGAGGAAGTCGGTCG	0	0	0	0	0	0	0	0	0	0	0	0	0	0	0	0	0	0	0	0	0	0	0	0	0	0	0	0	0	0	0	0	0	0	0	0	0	0	0	0	0	0	0	0	0	0
783	NODE_2877110_length_107_cov_3.53846_g2859696_i0	107	TCCTGTGCCTCGTGGCGATCGGGGTCTGCAGCCTCATGTCGAGCGCAGCGGGTGCCGCGTTGGGGACGCTCGGACGTCTGGGGGTCGGGATGATCTCCGGGATCACC	0	0	0	0	0	0	0	0	0	0	0	0	0	0	0	0	0	0	0	0	0	0	0	0	0	0	0	0	0	0	0	0	0	0	0	0	0	0	0	0	0	0	0	0	0	0
784	NODE_2878116_length_107_cov_3.53846_g2860702_i0	107	GGTCGGGGCATGGGACCCACGGGTCATCGGCGGGTTAGAAGTCCCAGTTCTTGCCTTCTCAGAACGCCCAGTCGCCGTCCTCCCTGGTGAGAGGCGATAAATCCTGC	0	0	0	0	0	0	0	0	0	0	0	0	0	0	0	0	0	0	0	0	0	0	0	0	0	0	0	0	0	0	0	0	0	0	0	0	0	0	0	0	0	0	0	0	0	0
785	NODE_2878668_length_107_cov_3.53846_g2861254_i0	107	CCGCTTCTCTTGCCCTTGTTTCCTCCTTCGTCAGCATGGATTGTCTCTTATTCTTTTACCGCCCGTTTGTTCTCCTCGCCGGTCGTGTCCCTAGGGCGTTCCTCCCT	0	0	0	0	0	0	0	0	0	0	0	0	0	0	0	0	0	0	0	0	0	0	0	0	0	0	0	0	0	0	0	0	0	0	0	0	0	0	0	0	0	0	0	0	0	0
786	NODE_2878879_length_107_cov_3.53846_g2861465_i0	107	TAAAATTCTCTATCAGCTGCAAAAAGATTCAATGAATTCCAACGGTTAGATCTCCGTGGATGACTCGAACACTGAAGCCCTGTTAGAATCTGACGGAACTCCGCGCG	0	0	0	0	0	0	0	0	0	0	0	0	0	0	0	0	0	0	0	0	0	0	0	0	0	0	0	0	0	0	0	0	0	0	0	0	0	0	0	0	0	0	0	0	0	0
787	NODE_2880955_length_107_cov_3.53846_g2863541_i0	107	GTTGATCTCTAGACACTACTAATTATAGGGAATTGGTTAATCACTACATATTAGCTTGGTACGGGATTAGCATATCATAAAGACTTAGCTTTCCCCGTTTAGATAGG	0	0	0	0	0	0	0	0	0	0	0	0	0	0	0	0	0	0	0	0	0	0	0	0	0	0	0	0	0	0	0	0	0	0	0	0	0	0	0	0	0	0	0	0	0	0
788	NODE_2881511_length_107_cov_3.53846_g2864097_i0	107	CTGTTTGAAACGGGAAGACCATAGATAGAGCATTCAAGATGCGAGCGAGAGATCAGAGCAGAGTGTGACTTCTGATAGAAGGGGCCCCAAGCGGTGGAGGGGTGAGA	0	0	0	0	0	0	0	0	0	0	0	0	0	0	0	0	0	0	0	0	0	0	0	0	0	0	0	0	0	0	0	0	0	0	0	0	0	0	0	0	0	0	0	0	0	0
789	NODE_2882833_length_107_cov_3.53846_g2865419_i0	107	TGGAGAACTAGCCCATTATCGGACATGTCTGCCGATAAGGCTGTCATATCGCTGGACACACCACCGATATCATTTTGTACGCCTGTCGCACCCTCTGAAAAGGGCAC	0	0	0	0	0	0	0	0	0	0	0	0	0	0	0	0	0	0	0	0	0	0	0	0	0	0	0	0	0	0	0	0	0	0	0	0	0	0	0	0	0	0	0	0	0	0
790	NODE_2882964_length_107_cov_3.53846_g2865550_i0	107	CCATTTCTAGACCTATAGCCTCGTAGAGGCATTTCCGTCTGGCAGTTCCTCGTCTCTAATTATTTTGCCCGGTTTCATTTCCGGAGGAACACTTCCAACTTTATTTC	0	0	0	0	0	0	0	0	0	0	0	0	0	0	0	0	0	0	0	0	0	0	0	0	0	0	0	0	0	0	0	0	0	0	0	0	0	0	0	0	0	0	0	0	0	0
791	NODE_2883328_length_107_cov_3.51923_g2865914_i0	107	GTATGAATTTTCATAAGCTCAATCTCTCTAAATTATGTCTTGAGCAACTTGATATAGTTGCTATACTCAAAAAGTTTCATGCTATTGTCTTTAAAACTCAATACCTC	0	0	0	0	0	0	0	0	0	0	0	0	0	0	0	0	0	0	0	0	0	0	0	0	0	0	0	0	0	0	0	0	0	0	0	0	0	0	0	0	0	0	0	0	0	0
792	NODE_2883904_length_107_cov_3.5_g2866490_i0	107	CACAAACAAGATCCAAAAAGCAAATGAGAAGATATGGAACTTGATTGAGCAACATGCCACATAGGAATAAGATTATTGACAATATCAATTCTAGGTGGCAATACCTC	0	0	0	0	0	0	0	0	0	0	0	0	0	0	0	0	0	0	0	0	0	0	0	0	0	0	0	0	0	0	0	0	0	0	0	0	0	0	0	0	0	0	0	0	0	0
793	NODE_2889709_length_107_cov_3.09615_g2872295_i0	107	GGGTTCTGGTTGGCCCGCCCAAAATGACACGATACTCAACATGACCCAAACTACATAGGAAAAAATGTATATAAAAAATTCCACATGCACGGGTTGCGAGTGTAGAG	0	0	0	0	0	0	0	0	0	0	0	0	0	0	0	0	0	0	0	0	0	0	0	0	0	0	0	0	0	0	0	0	0	0	0	0	0	0	0	0	0	0	0	0	0	0
794	NODE_2890046_length_107_cov_3.03846_g2872632_i0	107	GCCCTGGGTATCAGAAAGACTTCAGAACCCTCTGAATATTTGCCTGGCCTTCGAGATCCCCCCGGACCCAGGCAGAATGCTCCCGACCCCGAGAAGCAGTAACAATT	0	0	0	0	0	0	0	0	0.687359	0	0	0	0	0	0	0	0	0	0	0	0	0	0	0	0	0	0	0	0	0	0	0	0	0	0	0	0	0	0	0	0	0	0	0	0	0
795	NODE_2890579_length_107_cov_2.92308_g2873165_i0	107	AATCCCTAATCCTACTTTACCCCTTAAGCTAAGTTGTATTTTTCTTTGACCTACTAATTTAATTCTACGGGTACAAAATCTTTGAAAAGTTATTCCTCGGATTGTTG	0	0	0	0	0	0	0	0	0	0	0	0	0	0	0	0	0	0	0	0	0	0	0	0	0	0	0	0	0	0	0	0	0	0	0	0	0	0	0	0	0	0	0	0	0	0
796	NODE_2891729_length_107_cov_2.67308_g2874315_i0	107	GCTCCGATGGGTCACACCTCCCCGCATGCCCCACTCTCCCCCCTCTGGCTGGACACCCGTGCCCCCTGGGGAAATCGCGTGGTGTCAGAGAACCCTGTGGACTTTCA	0	0	0	0	0	0	0	0	0	0	0	0	0	0	0	0	0	0	0	0	0	0	0	0	0	0	0	0	0	0	0	0	0	0	0	0	0	0	0	0	0	0	0	0	0	0
797	NODE_2895562_length_107_cov_2.48077_g2878148_i0	107	CAAATTACTCATTGCTGTTCTCCTTCAACTTTTGCCCGGGCACAAGGACTCCATTACCATAAATGAAAGTTGTATGGTACGTACAGTAATTTGAGCTTGATTTTACA	0	0	0	0	0	0	0	0	0	0	0	0	0	0	0	0	0	0	0	0	0	0	0	0	0	0	0	0	0	0	0	0	0	0	0	0	0	0	0	0	0	0	0	0	0	0
798	NODE_2896252_length_107_cov_2.36538_g2878838_i0	107	CCTGCGGGCGCACTGTCTCCAGGACCACAGGTGCAAGCACTGGCGAGACCCCGGCCCCACCGCCCCCAGCCTCCTGTGTCCCGTAGGTCCCTCTGGCGCTGCGCCCC	0	0	0	0	0	0	0	0	0	0	0	0	0	0	0	0	0	0	0	0	0	0	0	0	0	0	0	0	0	0	0	0	0	0	0	0	0	0	0	0	0	0	0	0	0	0
799	NODE_2898277_length_107_cov_2.01923_g2880863_i0	107	CTCCACGCCAGGGAGAACCCAAACCCCCGCCAGACCGAGAACACCGGCGGGGGCGGCCGGAGACCCCAGCCAAAAGGACCCCCACCGGACAGGATCCCGCGAACTAC	0	0	0.515448	0	0	0	0	0	0	0	0	0	0	0	0	0	0	0	0	0	0	0	0	0	0	0	0	0	0	0	0	0	0	0	0	0	0.537164	0	0	0	0	0	0	0	0	0
800	NODE_2900446_length_106_cov_7.21569_g2883032_i0	106	GAAGAAGGAGCTCGTCGACGCCATCCAGAAGGCGAGCACCAAGAAGACGGCCGACGCCCGGAAGAAGAAGTAGGACCTCAGCAGGAGGGGACGACGACGAGCTCGG	0	0	0	0	0	0	0	0	0	0	0	0	0	0	0	0	0	0	0	0	0	0	0	0	0	0	0	0	0	0	0	0	0	0	0	0	0	0	0	0	0	0	0	0	0	0
801	NODE_2900631_length_106_cov_7.19608_g2883217_i0	106	CGGGTCTTGCCGTCGGCCTCGGTAGTGGCCGGGTCGGTGCCTGCCGTGCTGACGGTGCCGCCCTTCTGGCTCGACGCGTCGGGATCGTGGCCCTCCTCGGCGATGG	0	0	0	0	0	0	0	0	0	0	0	0	0	0	0	0	0	0	0	0	0	0	0	0	0	0	0	0	0	0	0	0	0	0	0	0	0	0	0	0	0	0	0	0	0	0
802	NODE_2901342_length_106_cov_6.19608_g2883928_i0	106	GAGCAGCTCGTCCACGGCGGCCTCGGCATCGCTGTCGGGATCGGCGGGCCCATCTGCATCCGCGTCTTTTGGCGTCGCCGCGCGCAGGCGGCGCTCGATGCTGAGC	0	0	0	0	0	0	0	0	0	0	0	0	0	0	0	0	0	0	0	0	0	0	0	0	0	0	0	0	0	0	0	0	0	0	0	0	0	0	0	0	0	0	0	0	0	0
803	NODE_2901520_length_106_cov_5.92157_g2884106_i0	106	GCCCGAGCAGGACAAGGCCGACGGTTTCTTCGCCGCCGCCGCCGCCTTTGGAACGTTCGTGTTCGCTGCCCTCATGGACGGGGAATACTTCGGGTGGTGTCAGGAG	0	0	0	0	0	0	0	0	0	0	0	0	0	0	0	0	0	0	0	0	0	0	0	0	0	0	0	0	0	0	0	0	0	0	0	0	0	0	0	0	0	0	0	0	0	0
804	NODE_2901743_length_106_cov_5.41176_g2884329_i0	106	CAGGCATAGTTAAACAATGTATTAAACATTATTCTGGTCTCCCAGAATTAATGACGTACCTTGTTTTACACAACTTTTCGGACCTTCCTTGCACTTTGACAGTAAG	0	0	0	1.73841	0	0	0	0	0	0	0	0	0	0	0	0	0	0	0	0	0	0	0	0	0	0	0	0	0	0	0	0	0	0	0	0	0	0	0	0	0	0	0	0	0	0
805	NODE_2901794_length_106_cov_5.41176_g2884380_i0	106	TGCGCAAGGAAATGGGCAATATGAAGCGCGCTGTGGGAGAATCCTTCGCCGCGCTTCATTTGAAACGATCATGCTCAGAGAGCATTCTTTGCAAAAAGAACACGGG	0	0	0	0	0	0	0	0	0	0	0	0	0	0	0	0	0	0	0	0	0	0	0	0	0	0	0	0	0	0	0	0	0	0	0	0	0	0	0	0	0	0	0	0	0	0
806	NODE_2902688_length_106_cov_5.41176_g2885274_i0	106	GAACGACAACGGCAACAACTGGGGTCCCGAGGCCCAGCTCGCTGTCGGTAACGTCGCCGCCATCATCTCCGCCGTCCCCGTTGCTGCTCCTTCCGTTGGCGCCGCC	0	0	0	0	0	0	0	0	0	0	0	0	0	0	0	0	0	0	0	0	0	0	0	0	0	0	0	0	0	0	0	0	0	0	0	0	0	0	0	0	0	0	0	0	0	0
807	NODE_2902732_length_106_cov_5.41176_g2885318_i0	106	CACCGGTGCGTGCCTATGCATTCAACACCAGTCGTCGCGATACGCTGGCCGTGAGTCCCACCGACGATGGTGGGCATAGCCCCCGCAACCGTCCCATCACCCCGAC	0	0	0	0	0	0	0	0	0	0	0	0	0	0	0	0	0	0	0	0	0	0	0	0	0	0	0	0	0	0	0	0	0	0	0	0	0	0	0	0	0	0	0	0	0	0
808	NODE_2903937_length_106_cov_5.37255_g2886523_i0	106	GTCGTCTAAGCCGTTGCCGGAAGACGAGGGCGGCGCCGCGTTGGAGGCGGGAGCACCTCCGAAGGAGCCAAAGCCTGAACCCGCTGGCGGTCGCGCTTGCTGGCCG	0	0	0	0	0	0	0	0	0	0	0	0	0	0	0	0	0	0	0	0	0	0	0	0	0	0	0	0	0	0	0	0	0	0	0	0	0	0	0	0	0	0	0	0	0	0
809	NODE_2904585_length_106_cov_5.27451_g2887171_i0	106	AGTAAGAGCTCTCCAAATGGTCACTATTAAAGCCCAGCTCTACCATCACACTACACCTCAAGACCATCTTTGCTGGCTGCCCTCTTATATCTTTGGTTCACAACTG	0	0	0	0	0	0	0	0	0	0	0	0	0	0	0	0	0	0	0	0	0	0	0	0	0	0	0	0	0	0	0	0	0	0	0	0	0	0	0	0	0	0	0	0	0	0
810	NODE_2905201_length_106_cov_5.13725_g2887787_i0	106	ACCGCACGAGGCTCCGAGCACCATCGCCTGACGGGGCGAGCGGGCCCGGACCGCGGGTGGGAGCAACCACTGGGGAGGCAACGGAGTCGAGAGCTGCACCGCCGGG	0	0	0	0	0	0	0	0	0	0	0	0	0	0	0	0	0	0	0	0	0	0	0	0	0	0	0	0	0	0	0	0	0	0	0	1.93427	0	0	0	0	0	0	0	0	0	0
811	NODE_2905227_length_106_cov_5.11765_g2887813_i0	106	GCACCACCACAAAGACTTCCAAATGCCTAGAATAGAATTGAATTAAACCGACTCCAATGTAGATTTATGGCTGAAACAAATACGTGCTCTGCTGCATATAATCTTT	0	0	0	0	0	0	0	0	0	0	0	0	0	0	0	0	0	0	0	0	0	0	0	0	0	0	0	0	0	0	0	0	0	0	0	0	0	0	0	0	0	0	0	0	0	0
812	NODE_2909327_length_106_cov_3.60784_g2891913_i0	106	CTTAGATAACACTCTTTAATTTGTATTAGCTTAATGTTAGTATCTCTACATCTCGTTACTTGCCCTCAATTTTACACTACAGTGTTCCGGTTTTATATTATCTTTG	0	0	0	0	0	0	0	0	0	0	0	0	0	0	0	0	0	0	0	0	0	0	0	0	0	0	0	0	0	0	0	0	0	0	0	0	0	0	0	0	0	0	0	0	0	0
813	NODE_2911809_length_106_cov_3.60784_g2894395_i0	106	GGCCTTGGCACGCTCGCCGGACCTGTCATCGGCTGCTTCCTCATGCTGATGCTGGCGACCCAACTCGGGACGTTGGGGCAGGGGGGAAGCGTGAGCTGGACCGACC	0	0	0	0	0	0	0	0	0	0	0	0	0	0	0	0	0	0	0	0	0	0	0	0	0	0	0	0	0	0	0	0	0	0	0	0	0	0	0	0	0	1.24576	0	0	0	0
814	NODE_2915889_length_106_cov_3.60784_g2898475_i0	106	GACGCGTAAAGGCTGCGGGCTGACGAATGTGCCCGTTAAAGTGCGTAGGCTTCGAGAGAAGTAGGCAAATCCGCTTCTTGAGCTGAAACACGATAGTATGAGAAGC	0	0	0	0	0	0	0	0	0	0	0	0	0	0	0	0	0	0	0	0	0	0	0	0	0	0	0	0	0	0	0	0	0	0	0	0	0	0	0.663107	0	0	0	0	0	0	0
815	NODE_2918018_length_106_cov_3.60784_g2900604_i0	106	GCTGGCCAGGTGCGTTCGGAGCTGTTCCTCAACTTCAGATCGCAGGATCCGCACATCACTGAACATATCACGAGGCAGCTGTGTCCTTCATCAAAACCTGGCCCGG	0	0	0	0	0	0	0	0	0	0	0	0	0	0	0	0	0	0	0	1.57653	0	0	0	0	0	0	0	0	0	0	0	0	0	0	0	0	0	0	0	0	0	0	0	0	0	0
816	NODE_2918376_length_106_cov_3.60784_g2900962_i0	106	ATAAGGGTTCTTGAGGGTTAAGCAGCGGAAGGGAGAGGATGGTAAGACAAGGCGAGAAAAAACAGTGCATAAGAGGGCGAATAACAGAAGAGGGGAAGAAAAAGGG	0	0	0	0	0	0	0	0	0	0	0	0	0	0	0	0	0	0	0	0	0	0	0	0	0	0	0	0	0	0	0	0	0	0	0	0	0	0	0	0	0	0	0	0	0	0.610139
817	NODE_2919249_length_106_cov_3.60784_g2901835_i0	106	CGCCACCACTGGTAATTACGCACAGGGTGGATATATCCAATCAGGTCCAACAACCTACGTGCAGCCAAGCAATAGCTACGTACAATCCGGATCAACCTATGTGCAT	0	0	0	0	0	1.49062	0	0	0	0	0	0	0	0	0	0	0	0	0	0	0	0	0	0	0	0	0	0	0	0	0	0	0	0	0	0	0	0	0	0	0	0	0	0	0	0
818	NODE_2919796_length_106_cov_3.60784_g2902382_i0	106	ATAGCATAAGTGCATCAACAAACAGGCAAAATATCCTCAAGACAAACACCTCAAAATCTGGTGGCTATTACTTATTACATGATCAATCCTATCCAATTCCCATCCA	0	0	0	0	0	0	0	0	0	0	0	0	0	0	0	0	0	0	0	0	0	0	0	0	0	0	0	0	0	0	0	0	0	0	0	0	0	0	0	0	0	0	0	0	0	0
819	NODE_2921192_length_106_cov_3.58824_g2903778_i0	106	ATTAATCTCTTTGTGTTCAGCAAGACCGGTGAGCCTGACGAACTCACTGTACCGTTGGGACAAAGTAAGTTGGTTGTGTTGTGTAGGTTCCAGTTGCTATTGACAC	0	0	0	0	0	0	0	0	0	0	0	0	0	0	0	0	0	0	0	0	0	0	0	0	0	0	0	0	0	0	0	0	0	0	0	0	0	0	0	0	0	0	0	0	0	0
820	NODE_2921546_length_106_cov_3.58824_g2904132_i0	106	CTCACACAAATTGCGACATTCTGAGCCATAATGAAGAGGAAGTACTTCATCTTCTTGCCCGCACTGAAGCTGTCGCCATTTTCGGCTTCAGAGGCTTATCATCCTG	0	0	0	0	0	0	0	0	0	0	0	0	0	0	0	0	0	0	0	0	0	0	0	0	0	0	0	0	0	0	0	0	0	0	0	0	0	0	0	0	0	0	0	0	0	0
821	NODE_2921901_length_106_cov_3.58824_g2904487_i0	106	GTGTCTTCTTCATCGACGTCTTCTTCTTCTTCAACCGTCTCTTCCAAAGGAGTTGGTACAGTCAACGGAACCTCTCCGGTCTCCATTATTGTCTGATACAAATCGG	0	0	0	0	0	0	0	0	0	0	0	0	0	0	0	0	0	0	0	0	0	0	0	0	0	0	0	0	0	0	0	0	0	0	0	0	0	0	0	0	0	0	0	0	0	0
822	NODE_2923102_length_106_cov_3.54902_g2905688_i0	106	GCCGTCTATCAGTGTGCGAGAGATGAGAACGTGTTTTCGAGGAGGTTTTTGGAGAGGTTATTATTCCTCTTCTGGGATTTCGATCTCTGGGGCCATGGCACCCCGG	0	0	0	0	0	0	0	0	0	0	0	0	0	0	0	0	0	0.772714	0	0	0	0	0	0	0	0	0	0	0	0	0	0	0	0	0	0	0	0	0	0	0	0	0	0	0	0
823	NODE_2927185_length_106_cov_3.21569_g2909771_i0	106	GGCGAGGACAATGGCCCGCGGCGGCGACGACGCCGGCGTGGGCGACGGCATGGAGCTCAGCCTCTGCCTCAGAACCCCTCCGCCGCCGCCGCGGAGGAACGACCAC	0	0	0	0	0	0	0	0	0	0	0	0	0	0	0	0	0	0	0	0	0	0	0	0	0	0	0	0	0	0	0	0	0	0	0	0	0	0	0	0	0	0	0	0	0	0
824	NODE_2927553_length_106_cov_3.13725_g2910139_i0	106	ATTCCGCGCACGGTACCGCCCCTCCTCCTCTCGTCCGTAGACGGAGGAGTTCAAAGGAACGGAACTCTAGCTGAGCTGGGTTAAGTTCGCACTGAGTGCTTCTTCA	0	0	0	0	0	0	0	0	0	0	0	0	0	0	0	0	0	0	0	0	0	0	0	0	0	0	0	0	0	0	0	0	0	0	0	0	0	0	0	0	0	0	0	0	0	0
825	NODE_2929046_length_106_cov_2.78431_g2911632_i0	106	CTCTCAAGAGGGTCCCGGAGCAGCCGGGGGGACTCAGGAGGGTGCCTTGAGACCTCATGGCCACACAGACGAGGGGCCACGACTCCATATGTTTCTTCCTCTTGAG	0	0	0	0	0	0	0	0	0	0	0	0	0	0	0	0	0	0	0	0	0	0	0	0	0	0	0	0	0	0	0	0	0	0	0	0	0	0	0	0	0	0	0	0	0	0
826	NODE_2929523_length_106_cov_2.70588_g2912109_i0	106	CTCAAATGCTAAATTACAACCCAAGGAGCGAAGGCGACGCGGAGGGCCGAAGAGGCCCGTGAGCCATTATTACCTAAGAAGGGTATGCTAGACTGCTAGACTAACG	0	0	0	0	0	0	0	0.645453	0	0	0	0	0	0	0	0	0	0	0	0	0	0	0	0	0	0	0	0	0	0	0	0	0	0	0	0	0	0	0	0	0	0	0	0	0	0
827	NODE_2932606_length_106_cov_2.58824_g2915192_i0	106	GCGTGTCAACAGCGCCGACCCTTCTCTCCCCGTCTTATCTCGACCATGCCGAGTCAAACGAGATTTCCGACCGGTGCAAACCGCTCGTCTTTGTCAGATGCTTGCC	0	0	0	0	0	0	0	0	0	0	0	0	0	0	0	0	0	0	0	0	0	0	0	0	0	0	0	0	0	0	0	0	0	0	0	0	0	0	0	0	0	0	0	0	0	0
828	NODE_2933280_length_106_cov_2.4902_g2915866_i0	106	CCGATAGTCAGATACTTGCATGTTGGGCTTTGTCGAGGGCCGTTATCGAGCCGTCCCAGGAGCGTGGCTAACCAAATATTTTTCGCTCCAGGTTGTGCACGTTATG	0	0	0	0	0	0	0	0	0	0	0	0	0	0	0	0	0	0	0	0	0	0	0	0	0	0	0	0	0	0	0	0	0	0	0	0	0	0	0	0	0	0	0	0	0	0
829	NODE_2934506_length_106_cov_2.23529_g2917092_i0	106	AGAGTATTAAATATTAATTTTAACTTGTTTAAGTGTAATGGATAATTTGGTAAGCAGAAAAAGCTCCAAATATTTATAATAGACAAATTGATAGGCTGGCTATTTT	0	0	0	0	0	0	0	0	0	0	0	0	0	0	0	0	0	0	0	0	0	0	0	0	0	0	0	0	0	0	0	0	0	0	0	0	0	0	0	0	0	0	0	0	0	0
830	NODE_2934909_length_106_cov_2.15686_g2917495_i0	106	TGTGTATCCAATGCTTAGCTCCCACCCATGAGAACACACAGCATTTGGCCCTCTGCTTCTGTGCCAATCTGCCCAGGACAATTGCCTACACCTGCTGATTAAAGGT	0	0	0	0	0	0	0	0	0	0	0	0	0	0	0	0	0	0	0	0	0	0	0	0	0	0	0	0	0	1.39031	0	0	0	0	0	0	0	0	0	0	0	0	0	0	0	0
831	NODE_2934947_length_106_cov_2.15686_g2917533_i0	106	AAGTTCGAAACAACTGATTTGTTGGTGGCTAAGTACTGAACTTCTTTGGCATCTCGATCTTACTGAGTTTAGTCTCCGTACGGACTATCAGTGCTAGATCATTGTG	0	0	0	0	0	0	0	0	0	0	0	0	0	0	0	0	0	0	0	0	0	0	0	0	0	0	0	0	0	0	0	0	0	0	0	0	0	0	0	0	0	0	0	0	0	0
832	NODE_2935750_length_106_cov_2_g2918336_i0	106	GGAGCAGCCTGCTGCACGGAGGTGGACTGCGGGGCCACGGAAGCGGCCGAGGCGGAACCGGCAGCGTCGGCCGAGGTCAGACCCAGCTTGGCGGAGCATGCGGGCC	0	0	0	0	0	0	0	0	0	0	0	0	0	0	0	0	0	0	0	0	0	0	0	0	0	0	0	0	0	0	0	0	0	0	0	0	0	0	0	0	0	0	0	0	0	0
833	NODE_2936732_length_105_cov_9.2_g2919318_i0	105	ATTAGCTTGATAGCCAAGACCTTGCTTACCATTTCTTTGCTTTTGGATACCCTCGAGTTTATCAAGGGCATCCTCACATTGAGCTACGGAGACCTTAGCAAGCTC	0	0	0	0	0	0	0	0	0	0	0	0	0	0	0	0	0	0	0	0	0	0	0	0	0	0	0	0	0	0	0	0	0	0	0	0	0	0	0	0	0	0	0	0	0	0
834	NODE_2936853_length_105_cov_8.78_g2919439_i0	105	GTCGGGGTCGCCGACAGCAGGCTTTCCTGAAGGCGGAGTGACCGCGCTGGACGGGAATTGATTCGTGGACACTCGGAAGTCGGCAGTTTGCCGGTCAATCGTTGG	0	0	0	0	0	0	0	0	0	0	0	0	0	0	0	0	0	0	0	0	0	0	0	0	0	0	0	0	0	0	0	0	0	0	0	0	0	0	0	0	0	0	0	0	0	0
835	NODE_2938203_length_105_cov_5.52_g2920789_i0	105	CTTCGGCCCGAGGCATCGGAAGCGATGCGGCATCTGCGGAGAAGGCAATGTCGAGCGCGAGCCCCGTTGACGGGACCGGCCGTGAGGGAACGTACCCACCCGGGC	0	0	0	0	0	0	0	0	0	0	0	0	0	0	0	0	0	0	0	0	0	0	0	0	0	0	0	0	0	0	0	0	0	0	0	0	0	0	0	0	0	0	0	0	0	0
836	NODE_2938234_length_105_cov_5.52_g2920820_i0	105	GTACGTGGTTAGCAAATAAAACCTGATATATAATCATGCATTGAAACCGCGTATCATGCAAAGTCGCAGCTATCTGCTGTACCCATGGTATGCATTAACACTCCG	0	0	0	0	0	0	0	0	0	0	0	0	0	0	0	0	0	0	0	0	0	0	0	0	0	0	0	0	0	0	0	0	0	0	0	0	0	0	0	0	0	0	0	0	0	0
837	NODE_2938328_length_105_cov_5.52_g2920914_i0	105	CCCTTTTCGTCTCTCTTTGATTTCTCTTTTTGTCTTGCTATTAGTTTGTATTTCATTGTGCTTTATTTTCCCTTTTCGTCTCTCTTTGATTTCTCTTCTGCTTCC	0	0	0	0	0	0	0	0	0	0	0	0	0	0	0	0	0	0	0	0	0	0	0	0	1.42282	0	0	0	0	0	0	0	0	0	0	0	0	0	0	0	0	0	0	0	0	0
838	NODE_2938353_length_105_cov_5.52_g2920939_i0	105	ATCAAGTCTAGCGACTCATTAGTATCACTCAGCTAACACGCCTTGCAGCGTTTACACATGTGACCTATCAAGGACGTAGTCTGCATCGTGTCGCATTATAGCTTC	0	0	0	0	0	0	0	0	0	0	0	0	0	0	0	0	0	0	0	0	0	0	0	0	0	0	0	0	0	0	0	0	0	0	0	0	0	0	0	0	0	0	0	0	0	0
839	NODE_2939264_length_105_cov_5.52_g2921850_i0	105	CTTCGGTCAGCTTCTTGCTGGCCCGCGTGGCAGAGGCCGCAGCGGCGCCCTTCAGGATGGTGGCCTCGGCTTCGAGCTGCTCGGCGAGAGATCGCCGCGTCGAAG	0	0	0	0	0	0	0	0	0	0	0	0	0	0	0	0	0	0	0	0	0	0	0	0	0	0	0	0	0	0	0	0	0	0	0	0	0	0	0	0	0	0	0	0	0	0
840	NODE_2939615_length_105_cov_5.52_g2922201_i0	105	GGTCTGCCACAACCCGGCCTGAGGACGCCGAGGCGCCATGCGCGCCGCCACTGTCATTGCTGCTGCTCGGCCGAGCGCGCCAGCGCGTCAGCAGCCGCCGGCTCC	0	0	2.06823	0	0	0	0	0	0	0	0	0	0	0	0	0	0	0	0	0	0	0	0	0	0	0	0	0	0	0	0	0	0	0	0	0	0	0	0	0	0	0	0	0	0	0
841	NODE_2942988_length_105_cov_4.2_g2925574_i0	105	CCCACACAAACCCAGATGGTATAACTTGGCTACCTGGCACAGCCTATTGCTCCCAGGCCACAGACCTGTAGAGCATGCCACTGTTCTGAACACTGGAGGCAACCG	0	0	0	0	0	0	0	0	0	0	0	0	0	1.94479	0	0	0	0	0	0	0	0	0	0	0	0	0	0	0	0	0	0	0	0	0	0	0	0	0	0	0	0	0	0	0	0
842	NODE_2944946_length_105_cov_3.68_g2927532_i0	105	GCGCGATGGCCCACCTCGACACTAACAGGAATGTGATCAATTTGCTCACAGTCATTGCTGGTGTTATGGGTGTTGCTTCATACTGTGACGCCAAACAGAAACCCC	0	0	0	0	0	0	0	0	0	0	0	0	0	0	0	0	0	0	0	0	0	0	0	0	0	0	0	0	0	0	0	0	0	0	0	0	0	0	0	0	0	0	0	0	0	0
843	NODE_2946950_length_105_cov_3.68_g2929536_i0	105	CCAATGGTGTGCTGGTGTAACATATATCCGCCCAAGTGGCGTCAAAAGAAACTATTAAAAACCCATAACCGCCCAAGTGGCGTCAAAAGAAATTATAAAAACCCA	0	0	0	0	0	0	0	0	0	0	0	0	0	0	0	0	0	0	0	0	0	0	0	0	0	0	0	0	0	0	0	0	0	0	0	0	0	0	0	0	0	0	0	0	0	0
844	NODE_2947258_length_105_cov_3.68_g2929844_i0	105	ATCTCCCTAAAGCCCCACATAATTTAAAATGGGGTAATTGCTCAATCTTGAGTTTGAGAAACTCTTCTAGGTTGGTTTTCTCCAATGATGACTGTTTCGAGAGAT	0	0	0	0	0	0	0	0	0	0	0	0	0	0	0	0	0	0	0	0	0	0	0	0	0	0	0	0	0	0	0	0	0	0	0	0	0	0	0	0	0	0	0	0	0	0
845	NODE_2947436_length_105_cov_3.68_g2930022_i0	105	GCAACTTAGAAAAGGAAGTAAGCATGTTAATACTAGCTTTCATGGATCCCCCTCTCTGAGAAACACCCCTTTCTAAGAAATTCACATTGCTGGGGCATCCCCTAC	0	0	0	0	0	0	0	0	0	0	0	0	0	0	0	0	0	0	0	0	0	0	0	0	0	0	0	0	0	0	0	0	0	0	0	0	0	0	0	0	0	0	0	0	0	0
846	NODE_2948084_length_105_cov_3.68_g2930670_i0	105	CTTATTTTCACAGTGACAACATTTGTATTGTTTAAAGAGAGTTTGATGTGGTGAACTAAGAATTATATTCCGTATAATCCCTGTGCTCTGATCTTTTTTAAAGCC	0	0	0	0	0	0	0	0	0	0	0	0	0	0	0	0	0	0	0	0	0	0	0	0	0	0	0	0	0	0	0	0	0	0	0	0	0	0	0	0	0	0	0	0	0	0
847	NODE_2948339_length_105_cov_3.68_g2930925_i0	105	CTGGTTTTGCATAGCTGTCACAAGCAAATGTGGAAAACTTATTCAAAAGCAAACATCACTTTAATGCATTATAATTCTGGCTATTCAAATTTTTGTTCAAGTTCA	0	0	0	0	0	0	0	0	0	0	0	0	0	0	0	0	0	0	0	0	0	0	0	0	0	0	0	0	0	0	0	0	0	0	0	0	0	0	0	0	0	0	0	0	0	0
848	NODE_2949582_length_105_cov_3.68_g2932168_i0	105	CTCTATAGCCACCTCTGCATTCAAACACCAAAACCACTTCTCCAGAAAGCACAGGCTTCCAATGCTCTCCATGATGAAACAGTGCCTGCATGCATTTGGTTTTTC	0	0	0	0	0	0	0	0	0	0	0	0	0	0	0	0	0	0	0	0	0	0	0	0	0	0	0	0	0	0	0	0	0	0	0	0	0	0	0	0	0.658745	0	0	0	0	0
849	NODE_2950594_length_105_cov_3.68_g2933180_i0	105	ATTCAATAGAAGTGTAAAAATACAATCTAAGACCTATGAAACGTAAAGTGAAAAAATATTTATAATTCTAATTTGATTCAATAAAATGTTAGAGGTCTACCTTCT	0	0	0	0	0	0	0	0	0	0	0	0	0	0	0	0	0	0	0	0	0	0	0	0	0	0	0	0	0	0	0	0	0	0	0	0	0	0	0	0	0	0	0	0	0	0
850	NODE_2950625_length_105_cov_3.68_g2933211_i0	105	CCTTTTTTCTCACATCCTCCTACTGATTTAGGCAAATCAGGTTAGACCTCTCAAATGCTGCATGAACAAATAAGTGACTTGGAGGCATTTCTGGTCTGAAAAGTG	0	0	0	0	0	0	0	0	0	0	0	0	0	0	0	0	0	0	0	0	0	0	0	0	0	0	0	0	0	0	0	0	0	0	0	0	0	0	0	0	0	0	0	0	0	0
851	NODE_2953062_length_105_cov_3.68_g2935648_i0	105	CCATCACCTGCCAAACCCAGTCACCTGTTCTGCAGACCCCCCAAACTCTGGGCTTCGCTGACCACACTCCTGCGGCAGAGCCCAATTAACACGCCCACCCATCCA	0	0	0	0	0	0	0	0	0	0	0	0	0	0	0	0	0	0	0	0	0	0	0	0	0	0	0	0	0	0	0	0	0	0	0	0	0	0	0	0	0	0	0	0	0	0
852	NODE_2956499_length_105_cov_3.66_g2939085_i0	105	CATGACCCTGCTTGGAGTGTGACTGCTGGATTCTTGTACAGCATTGATCTTGGCCCCAGGACCCTCCAAAGAGAGTAAGATCAGGTTGATATTCAAATATCTTGG	0	0	0	0	0	0	0	0	0	0	0	0	0	0	0	0	0	0	0	0	0	0	0	0	0	0	0	0	0	0	0	0	0	0	0	0	0	0	0	0	0	0	0	0	0	0
853	NODE_2961682_length_105_cov_3.28_g2944268_i0	105	CAAAGCCTTAGCCACCATTCTGAAGGTGAAGGTTCGAGACCATTCGGCCCCGATCCGAGCTGTGCGTTCTGTTGTTGCTCTCCAAGACCTACGTTTCATCCCAAC	0	0	0	0	0	0	0	0	0	0	0	0	0	0	0	0	0	1.53807	0	0	0	0	0	0	0	0	0	0	0	0	0	0	0	0	0	0	0	0	0	0	0	0	0	0	0	0
854	NODE_2961932_length_105_cov_3.22_g2944518_i0	105	GCAACAATGTGAAAAGCACTAAACAAAGATACTGGGCACTATGCCTCTAACAATCTGATGTCTATTACATGAACAAATCTCATCCAAACCCTACCATCCCCTCAC	0	0	0	0	0	0	0	0	0	0	0	0	0	0	0	0	0	0	0	0	0	0	0	0	0	0	0	0	0	0	0	0	0	0	0	0	0	0	0	0	0	0	0	0	0	0
855	NODE_2963462_length_105_cov_2.8_g2946048_i0	105	CCTGTCTGGGCGGTGTCGCGTGCCTGCGTGGCGTTGTGAGCCACTAGGCGGCATGGTGAACCGCCCGGCACGCGTGCACCTGGTTCGACGCCGGGGCGGTGCAGC	0	0	0	0	0	0	0	0	0	0	0	0	0	0	0	0	0	0	0	0	0	0	0	0	0	0	0	0	0	0	0	0	0	0	0	0	0	0	0	0	0	0	0	0	0	0
856	NODE_2963463_length_105_cov_2.8_g2946049_i0	105	GTGGCTGGAATTGTAGGGAAGAATATGAGATTCGCGTGGGGGCTGGAGTTGCTCATATGACAACAGCAGCTTATGGGGCCCAGTTCTATTGCTCTTGCGTCTGTC	0	0	0	0	0	0	0	0	0	0	0	0	0	0	0	0	0.650991	0	0	0	0	0	0	0	0	0	0	0	0	0	0	0	0	0	0	0	0	0	0	0	0	0	0	0	0	0
857	NODE_2969411_length_105_cov_2_g2951997_i0	105	ATCTCTGCAGATGAGCGCCGCTCGCATGGCGTTCCTGCCCATCCGAATTTACTTGCGGGCCTACGAGCCGAATCGCATCGCAACGCGACATGCGCTTGAAGAGAT	0	0	0	0	0	0	0	0	0	0	0	0	0	0	0	0	0	0	0	0	0	0	0	0	0	0	0	0	0	0	0	0	0	0	0	0	0	0	0	0	0	0	0	0	0	0
[truncated: 75 more columns]

## Sheet: Linsley2014
	contig	length	fasta	SRR1551036	SRR1551081	SRR1551012	SRR1551091	SRR1551002	SRR1551026	SRR1551022	SRR1551006	SRR1551095	SRR1551016	SRR1551085	SRR1551032	SRR1551103	SRR1551062	SRR1551046	SRR1550996	SRR1551056	SRR1550986	SRR1551113	SRR1551072	SRR1551076	SRR1551052	SRR1550982	SRR1551099	SRR1551042	SRR1550992	SRR1551089	SRR1551066	SRR1551107	SRR1551071	SRR1551110	SRR1551029	SRR1551055	SRR1550985	SRR1551045	SRR1550995	SRR1551061	SRR1551100	SRR1551039	SRR1551104	SRR1551065	SRR1551041	SRR1550991	SRR1551019	SRR1551051	SRR1550981
0	NODE_36642_length_334_cov_0.903010_g35923_i0	334	CCCGGACTCTTTCACCTCTGTCCCAGACTGCACCAACTGCATCTCGGCATANNNNNNNNNNNNNNNNNNNNNNNNNNNNNNNNNNNNNNNNNNNNNNNNNNNNNNNNNNNNNNNNNNNNNNNNNNNNNNNNNNNNNNNNNNNNNNNNNNNNNNNNNNNNNNNNNNNNNNNNNNNNNNNNNNNNNNNNNNNNNNNNNNNNNNNNNNNNNNNNNNNNNNNNNNNNNNNNNNNNNNNNNNNNNNNNNNNNNNNNNNNNNNNNNNNNNNNNGGCGAGGATGGCGGTTGGCCCCATGGTGGGGGAGGACAGAAAATGAAGCCCTGAGATTCCAGCTGGG	0	0	0	0	0	0	0	0	0	0	0	0	0.171272	0	0	0	0	0	0	0	0	0	0	0	0	0	0	0	0.263354	0	0	0	0	0	0	0	0	0	0	0	0	0	0	0	0	0
1	NODE_37611_length_327_cov_0.565068_g36892_i0	327	TTCACCATTTCCAGGGACAACGCCAACAAGTTACTGTTTCTGCAAATGGANNNNNNNNNNNNNNNNNNNNNNNNNNNNNNNNNNNNNNNNNNNNNNNNNNNNNNNNNNNNNNNNNNNNNNNNNNNNNNNNNNNNNNNNNNNNNNNNNNNNNNNNNNNNNNNNNNNNNNNNNNNNNNNNNNNNNNNNNNNNNNNNNNNNNNNNNNNNNNNNNNNNNNNNNNNNNNNNNNNNNNNNNNNNNNNNNNNNNNNNNNNNNNNNNNNNNNNNNNNNGCCGTCTATTACTGTGCGAGATGCCACACCACAAATGCCTTGAATTCCGATCTTTGG	0	0	0	0	0	0	0	0	0	0	0	0	0	0	0	0	0	0	0	0	0	0	0	0	0	0	0	0	0	0	0	0	0	0	0	0	0	0.154804	0	0	0	0	0	0	0	0
2	NODE_37839_length_325_cov_0.672414_g37120_i0	325	CTCAGGGACAGTGGCCACCTTGATCATCAGTGGGGCCCAAGTGGAGGATGAANNNNNNNNNNNNNNNNNNNNNNNNNNNNNNNNNNNNNNNNNNNNNNNNNNNNNNNNNNNNNNNNNNNNNNNNNNNNNNNNNNNNNNNNNNNNNNNNNNNNNNNNNNNNNNNNNNNNNNNNNNNNNNNNNNNNNNNNNNNNNNNNNNNNNNNNNNNNNNNNNNNNNNNNNNNNNNNNNNNNNNNNNNNNNNNNNNNNNNNNNNNNNNNNNNNNNNNNNTACTACTGTTACTCCACAGACAGTACTGGTGATTTTGGAGTGTTCGGCGGAGGGAC	0	0	0	0	0	0	0	0	0	0	0	0	0	0	0	0	0	0	0	0	0	0	0	0	0	0	0	0	0	0	0	0	0	0	0	0	0	0.155757	0	0	0	0	0	0	0	0
3	NODE_38177_length_322_cov_0.574913_g37458_i0	322	TCCAAAACAACAATCTGTTCTTAATTGTCCATCTCTAACTGTGATGTTGCCCNNNNNNNNNNNNNNNNNNNNNNNNNNNNNNNNNNNNNNNNNNNNNNNNNNNNNNNNNNNNNNNNNNNNNNNNNNNNNNNNNNNNNNNNNNNNNNNNNNNNNNNNNNNNNNNNNNNNNNNNNNNNNNNNNNNNNNNNNNNNNNNNNNNNNNNNNNNNNNNNNNNNNNNNNNNNNNNNNNNNNNNNNNNNNNNNNNNNNNNNNNNNNNNNNNNNNNNNNNNNCGACTCTAACGAGAGTCACAAGGTTGTCAGACATTGCACCCCGGTGCTAC	0	0	0	0	0	0	0	0	0	0	0	0	0	0	0	0	0	0	0	0	0	0	0	0	0	0	0	0	0	0	0	0	0	0	0	0	0	0.156893	0	0	0	0	0	0	0	0
4	NODE_38289_length_321_cov_0.629371_g37570_i0	321	TGGGGGAAGGGGGAGCAGGGCCTGGGGCTTTCTCTGGGGGTCATGAAAAAGNNNNNNNNNNNNNNNNNNNNNNNNNNNNNNNNNNNNNNNNNNNNNNNNNNNNNNNNNNNNNNNNNNNNNNNNNNNNNNNNNNNNNNNNNNNNNNNNNNNNNNNNNNNNNNNNNNNNNNNNNNNNNNNNNNNNNNNNNNNNNNNNNNNNNNNNNNNNNNNNNNNNNNNNNNNNNNNNNNNNNNNNNNNNNNNNNNNNNNNNNNNNNNNNNNNNNNNNNNNNACTGGTCATGATGCTGCATGACGCTGAACACATGGAGCACCACTGAGATC	0	0	0	0	0	0	0	0	0	0	0	0	0	0	0	0	0	0	0	0	0	0	0	0	0	0	0	0	0	0	0	0	0	0	0	0	0	0.189237	0	0	0	0	0	0	0	0
5	NODE_38302_length_321_cov_0.510490_g37583_i0	321	GAGCATTTCCCCTAGTCCCAGCTGACTAGGGGTTTTGTCTTGTCTGTACGNNNNNNNNNNNNNNNNNNNNNNNNNNNNNNNNNNNNNNNNNNNNNNNNNNNNNNNNNNNNNNNNNNNNNNNNNNNNNNNNNNNNNNNNNNNNNNNNNNNNNNNNNNNNNNNNNNNNNNNNNNNNNNNNNNNNNNNNNNNNNNNNNNNNNNNNNNNNNNNNNNNNNNNNNNNNNNNNNNNNNNNNNNNNNNNNNNNNNNNNNNNNNNNNNNNNNNNNNNNNNGTGGAACCTTTCCCTACTTCCCTTGATCATCTTTGAAACTAAAATTTATT	0	0	0	0	0	0	0	0	0	0	0	0	0	0	0	0	0	0	0	0	0	0	0	0	0	0	0	0	0	0	0	0	0	0	0	0	0	0	0	0	0	0	0	0	0	0
6	NODE_38304_length_321_cov_0.479021_g37585_i0	321	TCCTCGTCTTACATCCAGCATTGTCGGCCATCTCCGACAAAGCGAGTACTNNNNNNNNNNNNNNNNNNNNNNNNNNNNNNNNNNNNNNNNNNNNNNNNNNNNNNNNNNNNNNNNNNNNNNNNNNNNNNNNNNNNNNNNNNNNNNNNNNNNNNNNNNNNNNNNNNNNNNNNNNNNNNNNNNNNNNNNNNNNNNNNNNNNNNNNNNNNNNNNNNNNNNNNNNNNNNNNNNNNNNNNNNNNNNNNNNNNNNNNNNNNNNNNNNNNNNNNNNNNNCCTTACGGCTCCTAAAAGGTTCCGCAGCCTCGTACTTCCCCCTCGAGGCC	0	0	0	0	0	0	0	0	0	0	0	0	0	0	0	0	0	0	0	0	0	0	0	0	0	0	0	0	0	0	0	0	0	0	0	0	0	0	0	0	0	0	0	0	0	0
7	NODE_38386_length_320_cov_1.140351_g37667_i0	320	TACATCATTGCACAACTTATAACGTAGCCCACATTTTTCAACAAGACTACNNNNNNNNNNNNNNNNNNNNNNNNNNNNNNNNNNNNNNNNNNNNNNNNNNNNNNNNNNNNNNNNNNNNNNNNNNNNNNNNNNNNNNNNNNNNNNNNNNNNNNNNNNNNNNNNNNNNNNNNNNNNNNNNNNNNNNNNNNNNNNNNNNNNNNNNNNNNNNNNNNNNNNNNNNNNNNNNNNNNNNNNNNNNNNNNNNNNNNNNNNNNNNNNNNNNNNNNNNNNAGACTACGTTTTGATTCATTTCTGCCTATAACAGTTACACAAGATGCCAC	0	0	0	0	0	0	0	0	0	0	0	0	0	0	0	0	0	0	0	0	0	0	0	0	0	0	0	0	0	0	0	0	0	0	0	0	0	0.363521	0	0	0	0	0	0	0	0
8	NODE_38399_length_320_cov_0.964912_g37680_i0	320	TCACCTGTCACCGTGATCGGACCGACCTTGCGCTCGACGACGCCGTCGTCNNNNNNNNNNNNNNNNNNNNNNNNNNNNNNNNNNNNNNNNNNNNNNNNNNNNNNNNNNNNNNNNNNNNNNNNNNNNNNNNNNNNNNNNNNNNNNNNNNNNNNNNNNNNNNNNNNNNNNNNNNNNNNNNNNNNNNNNNNNNNNNNNNNNNNNNNNNNNNNNNNNNNNNNNNNNNNNNNNNNNNNNNNNNNNNNNNNNNNNNNNNNNNNNNNNNNNNNNNNNCTCGACCTCGGCCATGCCGGCGAGGGCCTCCCCGACGGAGACATGCTCGT	0	0	0	0	0	0	0	0	0	0	0	0	0	0	0	0	0	0	0	0	0	0	0	0	0	0	0	0	0	0	0	0	0	0	0	0	0	0.312268	0	0	0	0	0	0	0	0
9	NODE_38401_length_320_cov_0.947368_g37682_i0	320	TTCTTTAAATGTCATCGGTAATGATTCACATTTTGGTTTGTTGATCCTAANNNNNNNNNNNNNNNNNNNNNNNNNNNNNNNNNNNNNNNNNNNNNNNNNNNNNNNNNNNNNNNNNNNNNNNNNNNNNNNNNNNNNNNNNNNNNNNNNNNNNNNNNNNNNNNNNNNNNNNNNNNNNNNNNNNNNNNNNNNNNNNNNNNNNNNNNNNNNNNNNNNNNNNNNNNNNNNNNNNNNNNNNNNNNNNNNNNNNNNNNNNNNNNNNNNNNNNNNNNNGCGTCTGATAATATGAAATCTAAATCTCGTTCCATACCGCTAATTTCCAT	0	0	0	0	0	0	0	0	0	0	0	0	0	0	0	0	0	0	0	0	0	0	0	0	0	0	0	0	0	0	0	0	0	0	0	0	0	0.284743	0	0	0	0	0	0	0	0
10	NODE_38402_length_320_cov_0.947368_g37683_i0	320	GGTTGAGATACGAGTGTCTATGCAGGAGGGAAGTCTTCTCGCGAGGACCCNNNNNNNNNNNNNNNNNNNNNNNNNNNNNNNNNNNNNNNNNNNNNNNNNNNNNNNNNNNNNNNNNNNNNNNNNNNNNNNNNNNNNNNNNNNNNNNNNNNNNNNNNNNNNNNNNNNNNNNNNNNNNNNNNNNNNNNNNNNNNNNNNNNNNNNNNNNNNNNNNNNNNNNNNNNNNNNNNNNNNNNNNNNNNNNNNNNNNNNNNNNNNNNNNNNNNNNNNNNNTGAGGGAGCAAGACAGTCTCCCTCCAAGTCTAGTATGGACTCTCTAGTTG	0	0	0	0	0	0	0	0	0	0	0	0	0	0	0	0	0	0	0	0	0	0	0	0	0	0	0	0	0	0	0	0	0	0	0	0	0	0.284743	0	0	0	0	0	0	0	0
11	NODE_38404_length_320_cov_0.947368_g37685_i0	320	TCTTTTATAGCAACGGATTGTTACCATCTTCTGCATAAATCCCTGCAAACNNNNNNNNNNNNNNNNNNNNNNNNNNNNNNNNNNNNNNNNNNNNNNNNNNNNNNNNNNNNNNNNNNNNNNNNNNNNNNNNNNNNNNNNNNNNNNNNNNNNNNNNNNNNNNNNNNNNNNNNNNNNNNNNNNNNNNNNNNNNNNNNNNNNNNNNNNNNNNNNNNNNNNNNNNNNNNNNNNNNNNNNNNNNNNNNNNNNNNNNNNNNNNNNNNNNNNNNNNNNTTGTGTATGTAGTCCTAGCGCATAAATGTTCCTCCTTTATCGTTATAATG	0	0	0	0	0	0	0	0	0	0	0	0	0	0	0	0	0	0	0	0	0	0	0	0	0	0	0	0	0	0	0	0	0	0	0	0	0	0.284743	0	0	0	0	0	0	0	0
12	NODE_38417_length_320_cov_0.894737_g37698_i0	320	CTATATCCCTACAATTATCTAAGCAGGGTCTCTCTGCTTACACAGTGTTGNNNNNNNNNNNNNNNNNNNNNNNNNNNNNNNNNNNNNNNNNNNNNNNNNNNNNNNNNNNNNNNNNNNNNNNNNNNNNNNNNNNNNNNNNNNNNNNNNNNNNNNNNNNNNNNNNNNNNNNNNNNNNNNNNNNNNNNNNNNNNNNNNNNNNNNNNNNNNNNNNNNNNNNNNNNNNNNNNNNNNNNNNNNNNNNNNNNNNNNNNNNNNNNNNNNNNNNNNNNNTTAAGCACAATATTGGTTTCAATCCCTCTCCCTCGCAAAGTTTGCAAAGC	0	0	0	0	0	0	0	0	0	0	0	0	0	0	0	0	0	0	0	0	0	0	0	0	0	0	0	0	0	0	0	0	0	0	0	0	0	0.28411	0	0	0	0	0	0	0	0
13	NODE_38421_length_320_cov_0.863158_g37702_i0	320	GTAAAAGATGAAGAGAATGAAGATAATTGGGATTCTGCAACTGGTCAACANNNNNNNNNNNNNNNNNNNNNNNNNNNNNNNNNNNNNNNNNNNNNNNNNNNNNNNNNNNNNNNNNNNNNNNNNNNNNNNNNNNNNNNNNNNNNNNNNNNNNNNNNNNNNNNNNNNNNNNNNNNNNNNNNNNNNNNNNNNNNNNNNNNNNNNNNNNNNNNNNNNNNNNNNNNNNNNNNNNNNNNNNNNNNNNNNNNNNNNNNNNNNNNNNNNNNNNNNNNNGGTCAACAATATACTACTGTAACCCAAGAATTAGCTTTACTTAAAGGAGC	0	0	0	0	0	0	0	0	0	0	0	0	0	0	0	0	0	0	0	0	0	0	0	0	0	0	0	0	0	0	0	0	0	0	0	0	0	0.277466	0	0	0	0	0	0	0	0
14	NODE_38427_length_320_cov_0.842105_g37708_i0	320	CCCCGCCCTCCCCGACCACCATCTCCCCAAGCCATCAACCTAACGGCCCTNNNNNNNNNNNNNNNNNNNNNNNNNNNNNNNNNNNNNNNNNNNNNNNNNNNNNNNNNNNNNNNNNNNNNNNNNNNNNNNNNNNNNNNNNNNNNNNNNNNNNNNNNNNNNNNNNNNNNNNNNNNNNNNNNNNNNNNNNNNNNNNNNNNNNNNNNNNNNNNNNNNNNNNNNNNNNNNNNNNNNNNNNNNNNNNNNNNNNNNNNNNNNNNNNNNNNNNNNNNNGGACTTAAAGTTAGGCCAGAACCCAGGCCTCAACTTCATGGTGCTATGTT	0	0	0	0	0	0	0	0	0	0	0	0	0	0	0	0	0	0	0	0	0	0	0	0	0	0	0	0	0	0	0	0	0	0	0	0	0	0.252788	0	0	0	0	0	0	0	0
15	NODE_38436_length_320_cov_0.842105_g37717_i0	320	TGGGCATTTGAGCTCATCTCCGGAGGTCGACCATTGCTGAGCCAGCGCGCNNNNNNNNNNNNNNNNNNNNNNNNNNNNNNNNNNNNNNNNNNNNNNNNNNNNNNNNNNNNNNNNNNNNNNNNNNNNNNNNNNNNNNNNNNNNNNNNNNNNNNNNNNNNNNNNNNNNNNNNNNNNNNNNNNNNNNNNNNNNNNNNNNNNNNNNNNNNNNNNNNNNNNNNNNNNNNNNNNNNNNNNNNNNNNNNNNNNNNNNNNNNNNNNNNNNNNNNNNNNGGGTAAATGTCCGCAAACCACCCCGATCGGCTGTTTGCCTGGTGTCTGGC	0	0	0	0	0	0	0	0	0	0	0	0	0	0	0	0	0	0	0	0	0	0	0	0	0	0	0	0	0	0	0	0	0	0	0	0	0	0.253105	0	0	0	0	0	0	0	0
16	NODE_38438_length_320_cov_0.838596_g37719_i0	320	TATTCATGTGTTTTATTTTATATAAAAATAAAACATAATCAATTGGTCTGNNNNNNNNNNNNNNNNNNNNNNNNNNNNNNNNNNNNNNNNNNNNNNNNNNNNNNNNNNNNNNNNNNNNNNNNNNNNNNNNNNNNNNNNNNNNNNNNNNNNNNNNNNNNNNNNNNNNNNNNNNNNNNNNNNNNNNNNNNNNNNNNNNNNNNNNNNNNNNNNNNNNNNNNNNNNNNNNNNNNNNNNNNNNNNNNNNNNNNNNNNNNNNNNNNNNNNNNNNNNGTAAATACAAAATTGAAAAGTTATGCAGGAAGAACGTGCTATGTGAAATT	0	0	0	0	0	0	0	0	0	0	0	0	0	0	0	0	0	0	0	0	0	0	0	0	0	0	0	0	0	0	0	0	0	0	0	0	0	0	0	0	0	0	0	0	0	0
17	NODE_38439_length_320_cov_0.838596_g37720_i0	320	TAGCCTTCTACCTGAGGCAGCAAGAGTCAACTATCATCCAAAGGGCTATTNNNNNNNNNNNNNNNNNNNNNNNNNNNNNNNNNNNNNNNNNNNNNNNNNNNNNNNNNNNNNNNNNNNNNNNNNNNNNNNNNNNNNNNNNNNNNNNNNNNNNNNNNNNNNNNNNNNNNNNNNNNNNNNNNNNNNNNNNNNNNNNNNNNNNNNNNNNNNNNNNNNNNNNNNNNNNNNNNNNNNNNNNNNNNNNNNNNNNNNNNNNNNNNNNNNNNNNNNNNNCAAGACCTTATCGAGGATTTGAGCGAATTTCTAAACAAATGTTCGCCGCA	0	0	0	0	0	0	0	0	0	0	0	0	0	0	0	0	0	0	0	0	0	0	0	0	0	0	0	0	0	0	0	0	0	0	0	0	0	0.252155	0	0	0	0	0	0	0	0
18	NODE_38440_length_320_cov_0.838596_g37721_i0	320	TCTCGGAGACGGCTCTCACAGACTCTCAGCATAGGGGCGTCCTTTCGTTANNNNNNNNNNNNNNNNNNNNNNNNNNNNNNNNNNNNNNNNNNNNNNNNNNNNNNNNNNNNNNNNNNNNNNNNNNNNNNNNNNNNNNNNNNNNNNNNNNNNNNNNNNNNNNNNNNNNNNNNNNNNNNNNNNNNNNNNNNNNNNNNNNNNNNNNNNNNNNNNNNNNNNNNNNNNNNNNNNNNNNNNNNNNNNNNNNNNNNNNNNNNNNNNNNNNNNNNNNNNCGTTATTTGAATTGGTGAAGGCTCTCGATAAGCGGGGCTTAAGACGCAAT	0	0	0	0	0	0	0	0	0	0	0	0	0	0	0	0	0	0	0	0	0	0	0	0	0	0	0	0	0	0	0	0	0	0	0	0	0	0.283794	0	0	0	0	0	0	0	0
19	NODE_38443_length_320_cov_0.828070_g37724_i0	320	CAAGAAGTGAGAGGAAGGATAGATGATGGTGATGACGAGTGATGGGATGANNNNNNNNNNNNNNNNNNNNNNNNNNNNNNNNNNNNNNNNNNNNNNNNNNNNNNNNNNNNNNNNNNNNNNNNNNNNNNNNNNNNNNNNNNNNNNNNNNNNNNNNNNNNNNNNNNNNNNNNNNNNNNNNNNNNNNNNNNNNNNNNNNNNNNNNNNNNNNNNNNNNNNNNNNNNNNNNNNNNNNNNNNNNNNNNNNNNNNNNNNNNNNNNNNNNNNNNNNNNAAAGGTGGTTCATGATCAGATCCATGGATCACCGAGACTCGTGCTTCTTT	0	0	0	0	0	0	0	0	0	0	0	0	0	0	0	0	0	0	0	0	0	0	0	0	0	0	0	0	0	0	0	0	0	0	0	0	0	0.250574	0	0	0	0	0	0	0	0
20	NODE_38452_length_320_cov_0.800000_g37733_i0	320	TTCGGCAGCCTCGACCTGCGCCTTGGCAACAGCAAGTTCGGCGCGCGATGNNNNNNNNNNNNNNNNNNNNNNNNNNNNNNNNNNNNNNNNNNNNNNNNNNNNNNNNNNNNNNNNNNNNNNNNNNNNNNNNNNNNNNNNNNNNNNNNNNNNNNNNNNNNNNNNNNNNNNNNNNNNNNNNNNNNNNNNNNNNNNNNNNNNNNNNNNNNNNNNNNNNNNNNNNNNNNNNNNNNNNNNNNNNNNNNNNNNNNNNNNNNNNNNNNNNNNNNNNNNTTGCGTTCTGGGAGCGATGCCACGTTGAGCAAGACTTTGGAACCTGGCAT	0	0	0	0	0	0	0	0	0	0	0	0	0	0	0	0	0	0	0	0	0	0	0	0	0	0	0	0	0	0	0	0	0	0	0	0	0	0.252472	0	0	0	0	0	0	0	0
21	NODE_38454_length_320_cov_0.789474_g37735_i0	320	GTGTTCTTGTAATAATATGTAGTTGTTTTATAAAAGAAGAACATATTTAGNNNNNNNNNNNNNNNNNNNNNNNNNNNNNNNNNNNNNNNNNNNNNNNNNNNNNNNNNNNNNNNNNNNNNNNNNNNNNNNNNNNNNNNNNNNNNNNNNNNNNNNNNNNNNNNNNNNNNNNNNNNNNNNNNNNNNNNNNNNNNNNNNNNNNNNNNNNNNNNNNNNNNNNNNNNNNNNNNNNNNNNNNNNNNNNNNNNNNNNNNNNNNNNNNNNNNNNNNNNNACTCAATAAGCTGTCAGATATCACAGACAGCTTGTTTCGTCAAACCGACA	0	0	0	0	0	0	0	0	0	0	0	0	0	0	0	0	0	0	0	0	0	0	0	0	0	0	0	0	0	0	0	0	0	0	0	0	0	0.252788	0	0	0	0	0	0	0	0
22	NODE_38466_length_320_cov_0.743860_g37747_i0	320	GGAAGGGACAAAGAGAAAGGAAGGGAAGTAGAACGAGCATCTTATGATTTNNNNNNNNNNNNNNNNNNNNNNNNNNNNNNNNNNNNNNNNNNNNNNNNNNNNNNNNNNNNNNNNNNNNNNNNNNNNNNNNNNNNNNNNNNNNNNNNNNNNNNNNNNNNNNNNNNNNNNNNNNNNNNNNNNNNNNNNNNNNNNNNNNNNNNNNNNNNNNNNNNNNNNNNNNNNNNNNNNNNNNNNNNNNNNNNNNNNNNNNNNNNNNNNNNNNNNNNNNNNCAGTTGTGGCACTGCACATGTAGGGGTGGCTTTGGCCCATCAGACACAGG	0	0	0	0	0	0	0	0	0	0	0	0	0.178765	0	0	0	0	0	0	0	0	0	0	0	0	0	0	0	0	0	0	0	0	0	0	0	0	0	0	0	0	0	0	0	0	0
23	NODE_38471_length_320_cov_0.736842_g37752_i0	320	TGGTGTTTAATAATTTTGTCTTGAAGTTAGACTGGAGAGTATCTAGCGAGNNNNNNNNNNNNNNNNNNNNNNNNNNNNNNNNNNNNNNNNNNNNNNNNNNNNNNNNNNNNNNNNNNNNNNNNNNNNNNNNNNNNNNNNNNNNNNNNNNNNNNNNNNNNNNNNNNNNNNNNNNNNNNNNNNNNNNNNNNNNNNNNNNNNNNNNNNNNNNNNNNNNNNNNNNNNNNNNNNNNNNNNNNNNNNNNNNNNNNNNNNNNNNNNNNNNNNNNNNNNCGCTTTCCAAATTTAGGTAACGACCCAAAAATTGCAGTCAGAGAAGGGTA	0	0	0	0	0	0	0	0	0	0	0	0	0	0	0	0	0	0	0	0	0	0	0	0	0	0	0	0	0	0	0	0	0	0	0	0	0	0.221467	0	0	0	0	0	0	0	0
24	NODE_38472_length_320_cov_0.736842_g37753_i0	320	CCAATCAGAGCAACGTAGTACGACCATAACGTAGACCATAGGGCCAGCTGNNNNNNNNNNNNNNNNNNNNNNNNNNNNNNNNNNNNNNNNNNNNNNNNNNNNNNNNNNNNNNNNNNNNNNNNNNNNNNNNNNNNNNNNNNNNNNNNNNNNNNNNNNNNNNNNNNNNNNNNNNNNNNNNNNNNNNNNNNNNNNNNNNNNNNNNNNNNNNNNNNNNNNNNNNNNNNNNNNNNNNNNNNNNNNNNNNNNNNNNNNNNNNNNNNNNNNNNNNNNCATTAAACTTTTACCGGATCCCGTAGGAAGGACGGCAAAAACATCTTTTC	0	0	0	0	0	0	0	0	0	0	0	0	0	0	0	0	0	0	0	0	0	0	0	0	0	0	0	0	0	0	0	0	0	0	0	0	0	0.221467	0	0	0	0	0	0	0	0
25	NODE_38473_length_320_cov_0.736842_g37754_i0	320	GGCCTGTGCCAGTTGCGTGTTCAGCCGCCAGGTGTCGACGTGGTGGCGCGNNNNNNNNNNNNNNNNNNNNNNNNNNNNNNNNNNNNNNNNNNNNNNNNNNNNNNNNNNNNNNNNNNNNNNNNNNNNNNNNNNNNNNNNNNNNNNNNNNNNNNNNNNNNNNNNNNNNNNNNNNNNNNNNNNNNNNNNNNNNNNNNNNNNNNNNNNNNNNNNNNNNNNNNNNNNNNNNNNNNNNNNNNNNNNNNNNNNNNNNNNNNNNNNNNNNNNNNNNNNGCGCGGCAGTTGGTCGATGCTGTACAGATAGGGCGCCACCGCGATGCGGG	0	0	0	0	0	0	0	0	0	0	0	0	0	0	0	0	0	0	0	0	0	0	0	0	0	0	0	0	0	0	0	0	0	0	0	0	0	0.22115	0	0	0	0	0	0	0	0
26	NODE_38477_length_320_cov_0.736842_g37758_i0	320	GGAGCTTTCTGCATTGGCTGAAGTCATACCGTGAGGAGTGGTGGACGATGNNNNNNNNNNNNNNNNNNNNNNNNNNNNNNNNNNNNNNNNNNNNNNNNNNNNNNNNNNNNNNNNNNNNNNNNNNNNNNNNNNNNNNNNNNNNNNNNNNNNNNNNNNNNNNNNNNNNNNNNNNNNNNNNNNNNNNNNNNNNNNNNNNNNNNNNNNNNNNNNNNNNNNNNNNNNNNNNNNNNNNNNNNNNNNNNNNNNNNNNNNNNNNNNNNNNNNNNNNNNGCGAGAAATGAGTGAGAATCTCATTGGTCGAAAACCTAAGGTTCCTGAGG	0	0	0	0	0	0	0	0	0	0	0	0	0	0	0	0	0	0	0	0	0	0	0	0	0	0	0	0	0	0	0	0	0	0	0	0	0	0.220834	0	0	0	0	0	0	0	0
27	NODE_38479_length_320_cov_0.736842_g37760_i0	320	TCCGGATCCCTTCAAAGTTTCCATTACGAAATGTCTAAATTCGTCATCTGNNNNNNNNNNNNNNNNNNNNNNNNNNNNNNNNNNNNNNNNNNNNNNNNNNNNNNNNNNNNNNNNNNNNNNNNNNNNNNNNNNNNNNNNNNNNNNNNNNNNNNNNNNNNNNNNNNNNNNNNNNNNNNNNNNNNNNNNNNNNNNNNNNNNNNNNNNNNNNNNNNNNNNNNNNNNNNNNNNNNNNNNNNNNNNNNNNNNNNNNNNNNNNNNNNNNNNNNNNNNATGGTCCCGAACCTTCCAGTTGATGGGTGTTCGGTATTCTTTCGTCCACA	0	0	0	0	0	0	0	0	0	0	0	0	0	0	0	0	0	0	0	0	0	0	0	0	0	0	0	0	0	0	0	0	0	0	0	0	0	0.221467	0	0	0	0	0	0	0	0
28	NODE_38484_length_320_cov_0.736842_g37765_i0	320	AGCAGCTGTGTGTTGGTTCGCGTGAGACTTCCGTTGCCGAGCCTGGATCTNNNNNNNNNNNNNNNNNNNNNNNNNNNNNNNNNNNNNNNNNNNNNNNNNNNNNNNNNNNNNNNNNNNNNNNNNNNNNNNNNNNNNNNNNNNNNNNNNNNNNNNNNNNNNNNNNNNNNNNNNNNNNNNNNNNNNNNNNNNNNNNNNNNNNNNNNNNNNNNNNNNNNNNNNNNNNNNNNNNNNNNNNNNNNNNNNNNNNNNNNNNNNNNNNNNNNNNNNNNNTTTATCCCGCCACTTGGAGCGGCAGTTTGGAAGAGTACGCCTTGCAGAAG	0	0	0	0	0	0	0	0	0	0	0	0	0	0	0	0	0	0	0	0	0	0	0	0	0	0	0	0	0	0	0	0	0	0	0	0	0	0.244879	0	0	0	0	0	0	0	0
29	NODE_38496_length_320_cov_0.736842_g37777_i0	320	CTTCTCGGATCCTCGTCTCATGAGCAAAGATGTCGTTGCTGAGATGGCCGNNNNNNNNNNNNNNNNNNNNNNNNNNNNNNNNNNNNNNNNNNNNNNNNNNNNNNNNNNNNNNNNNNNNNNNNNNNNNNNNNNNNNNNNNNNNNNNNNNNNNNNNNNNNNNNNNNNNNNNNNNNNNNNNNNNNNNNNNNNNNNNNNNNNNNNNNNNNNNNNNNNNNNNNNNNNNNNNNNNNNNNNNNNNNNNNNNNNNNNNNNNNNNNNNNNNNNNNNNNNCATGTTCCTCAAAGATCCAATCTGCTTCTACGCCAACATCGAAAGCATGT	0	0	0	0	0	0	0	0	0	0	0	0	0	0	0	0	0	0	0	0	0	0	0	0	0	0	0	0	0	0	0	0	0	0	0	0	0	0.221467	0	0	0	0	0	0	0	0
30	NODE_38512_length_320_cov_0.736842_g37793_i0	320	CTTGCTTCTGTGAGTTGCCATGCATAAAATCAATCAGCAGATTAAAAGGANNNNNNNNNNNNNNNNNNNNNNNNNNNNNNNNNNNNNNNNNNNNNNNNNNNNNNNNNNNNNNNNNNNNNNNNNNNNNNNNNNNNNNNNNNNNNNNNNNNNNNNNNNNNNNNNNNNNNNNNNNNNNNNNNNNNNNNNNNNNNNNNNNNNNNNNNNNNNNNNNNNNNNNNNNNNNNNNNNNNNNNNNNNNNNNNNNNNNNNNNNNNNNNNNNNNNNNNNNNNGTTGGTTGATTCATGTCACCACTTTGAGCGACCCATGAGTTTCTAAACCT	0	0	0	0	0	0	0	0	0	0	0	0	0	0	0	0	0	0	0	0	0	0	0	0	0	0	0	0	0	0	0	0	0	0	0	0	0	0.221467	0	0	0	0	0	0	0	0
31	NODE_38515_length_320_cov_0.736842_g37796_i0	320	GTCGGTGGTGATGGCTCGATATTACATGCTGCTGAGGCGCTGGCGCGTTANNNNNNNNNNNNNNNNNNNNNNNNNNNNNNNNNNNNNNNNNNNNNNNNNNNNNNNNNNNNNNNNNNNNNNNNNNNNNNNNNNNNNNNNNNNNNNNNNNNNNNNNNNNNNNNNNNNNNNNNNNNNNNNNNNNNNNNNNNNNNNNNNNNNNNNNNNNNNNNNNNNNNNNNNNNNNNNNNNNNNNNNNNNNNNNNNNNNNNNNNNNNNNNNNNNNNNNNNNNNGCGTTTGGGGTTCTTGGCTGATGTAAAACCTGAGGAAGCCGCGTTTAAAT	0	0	0	0	0	0	0	0	0	0	0	0	0	0	0	0	0	0	0	0	0	0	0	0	0	0	0	0	0	0	0	0	0	0	0	0	0	0.221467	0	0	0	0	0	0	0	0
32	NODE_38516_length_320_cov_0.736842_g37797_i0	320	GGCGATTGCCGAACAACTCGGCGACGGGGACAACGAGGACGAAGTATTCGNNNNNNNNNNNNNNNNNNNNNNNNNNNNNNNNNNNNNNNNNNNNNNNNNNNNNNNNNNNNNNNNNNNNNNNNNNNNNNNNNNNNNNNNNNNNNNNNNNNNNNNNNNNNNNNNNNNNNNNNNNNNNNNNNNNNNNNNNNNNNNNNNNNNNNNNNNNNNNNNNNNNNNNNNNNNNNNNNNNNNNNNNNNNNNNNNNNNNNNNNNNNNNNNNNNNNNNNNNNNCCTGATTAACCCCGATGTTCATAGCTTTCTTACTCAGTCGGCTCTGATCC	0	0	0	0	0	0	0	0	0	0	0	0	0	0	0	0	0	0	0	0	0	0	0	0	0	0	0	0	0	0	0	0	0	0	0	0	0	0.22115	0	0	0	0	0	0	0	0
33	NODE_38526_length_320_cov_0.729825_g37807_i0	320	ACAAATAACTTACTTAGAAATTATTAGAAAACGATCTGATACGCATATTTNNNNNNNNNNNNNNNNNNNNNNNNNNNNNNNNNNNNNNNNNNNNNNNNNNNNNNNNNNNNNNNNNNNNNNNNNNNNNNNNNNNNNNNNNNNNNNNNNNNNNNNNNNNNNNNNNNNNNNNNNNNNNNNNNNNNNNNNNNNNNNNNNNNNNNNNNNNNNNNNNNNNNNNNNNNNNNNNNNNNNNNNNNNNNNNNNNNNNNNNNNNNNNNNNNNNNNNNNNNNCAAATAAGGTGAACATAATAAACTCCTACGCATTTTTTAGCAAATATGTT	0	0	0	0	0	0	0	0	0	0	0	0	0	0	0	0	0	0	0	0	0	0	0	0	0	0	0	0	0	0	0	0	0	0	0	0	0	0.221467	0	0	0	0	0	0	0	0
34	NODE_38533_length_320_cov_0.722807_g37814_i0	320	AGGCCGACATATCCTGGGACCAGCGGGACTACAACATATCCTGGGACCACCAAAAGCCGACATATCCTGGGNNNNNNNNNNNNNNNNNNNNNNNNNNNNNNNNNNNNNNNNNNNNNNNNNNNNNNNNNNNNNNNNNNNNNNNNNNNNNNNNNNNNNNNNNNNNNNNNNNNNNNNNNNNNNNNNNNNNNNNNNNNNNNNNNNNNNNNNNNNNNNNNNNNNNNNNNNNNNNNNNNNNNNNNNNNNNNNNNNNNNNNNNNNNNNNNNNNNNNNAGGGAGCCCTCCCAGGTCTCTCCTATTCTCCTACTCAGACTCAATTTGGT	0	0	0	0	0	0	0	0	0	0	0	0	0	0	0	0	0	0	0	0	0	0	0	0	0	0	0	0	0	0	0	0	0	0	0	0	0	0	0	0	0	0	0	0	0	0
35	NODE_38535_length_320_cov_0.719298_g37816_i0	320	CTACCATCAGGCGCATACGTGTCCGAGAGTCCTCCGACCTCCCGATAAACNNNNNNNNNNNNNNNNNNNNNNNNNNNNNNNNNNNNNNNNNNNNNNNNNNNNNNNNNNNNNNNNNNNNNNNNNNNNNNNNNNNNNNNNNNNNNNNNNNNNNNNNNNNNNNNNNNNNNNNNNNNNNNNNNNNNNNNNNNNNNNNNNNNNNNNNNNNNNNNNNNNNNNNNNNNNNNNNNNNNNNNNNNNNNNNNNNNNNNNNNNNNNNNNNNNNNNNNNNNNCTCCACTCCCGATCATATTCCCCGCTCTGAATTCCGCCCCGTCTGGCGTG	0	0	0	0	0	0	0	0	0	0	0	0	0	0	0	0	0	0	0	0	0	0	0	0	0	0	0	0	0	0	0	0	0	0	0	0	0	0.219568	0	0	0	0	0	0	0	0
36	NODE_38557_length_320_cov_0.694737_g37838_i0	320	CATGTACTTCCCCGGCGACGTACTCCGCACAAGCCGCCGAATGAACGAAANNNNNNNNNNNNNNNNNNNNNNNNNNNNNNNNNNNNNNNNNNNNNNNNNNNNNNNNNNNNNNNNNNNNNNNNNNNNNNNNNNNNNNNNNNNNNNNNNNNNNNNNNNNNNNNNNNNNNNNNNNNNNNNNNNNNNNNNNNNNNNNNNNNNNNNNNNNNNNNNNNNNNNNNNNNNNNNNNNNNNNNNNNNNNNNNNNNNNNNNNNNNNNNNNNNNNNNNNNNNGTGTCATCTTCCTGGAACCCGGCCAGGTAAAGCGCGGCTGGGAACGATTC	0	0	0	0	0	0	0	0	0	0	0	0	0	0	0	0	0	0	0	0	0	0	0	0	0	0	0	0	0	0	0	0	0	0	0	0	0	0.221467	0	0	0	0	0	0	0	0
37	NODE_38562_length_320_cov_0.684211_g37843_i0	320	CTCCTACATCGACTACAATTCAAGCTCCAAGAGAGATATAGAAGCTCGGTNNNNNNNNNNNNNNNNNNNNNNNNNNNNNNNNNNNNNNNNNNNNNNNNNNNNNNNNNNNNNNNNNNNNNNNNNNNNNNNNNNNNNNNNNNNNNNNNNNNNNNNNNNNNNNNNNNNNNNNNNNNNNNNNNNNNNNNNNNNNNNNNNNNNNNNNNNNNNNNNNNNNNNNNNNNNNNNNNNNNNNNNNNNNNNNNNNNNNNNNNNNNNNNNNNNNNNNNNNNNCCAATAAAGGAGGAGATCAAGCCAAAAGAGTCCAAATAGAAGAAAACTTC	0	0	0	0	0	0	0	0	0	0	0	0	0	0	0	0	0	0	0	0	0	0	0	0	0	0	0	0	0	0	0	0	0	0	0	0	0	0.216088	0	0	0	0	0	0	0	0
38	NODE_38568_length_320_cov_0.684211_g37849_i0	320	TCGGTTATTCAAATCGAGTATTTTTTCCTTCTTATTCTAAAGCTTGGAACNNNNNNNNNNNNNNNNNNNNNNNNNNNNNNNNNNNNNNNNNNNNNNNNNNNNNNNNNNNNNNNNNNNNNNNNNNNNNNNNNNNNNNNNNNNNNNNNNNNNNNNNNNNNNNNNNNNNNNNNNNNNNNNNNNNNNNNNNNNNNNNNNNNNNNNNNNNNNNNNNNNNNNNNNNNNNNNNNNNNNNNNNNNNNNNNNNNNNNNNNNNNNNNNNNNNNNNNNNNNAAATTGTAACGAGTGTAGAATTTCTTTAAGTATAAATTATGCAATATTTG	0	0	0	0	0	0	0	0	0	0	0	0	0	0	0	0.392764	0	0	0	0	0	0	0	0	0	0	0	0	0	0	0	0	0	0	0	0	0	0	0	0	0	0	0	0	0	0
39	NODE_38594_length_320_cov_0.631579_g37875_i0	320	TATAGTGTGAGTGAATTCTTGATTATGTCATCTGAAATAAGTTTGCCTTTNNNNNNNNNNNNNNNNNNNNNNNNNNNNNNNNNNNNNNNNNNNNNNNNNNNNNNNNNNNNNNNNNNNNNNNNNNNNNNNNNNNNNNNNNNNNNNNNNNNNNNNNNNNNNNNNNNNNNNNNNNNNNNNNNNNNNNNNNNNNNNNNNNNNNNNNNNNNNNNNNNNNNNNNNNNNNNNNNNNNNNNNNNNNNNNNNNNNNNNNNNNNNNNNNNNNNNNNNNNNTACAAGCATTTTGGGTATACTCCCATCTAAGATCCTGTTAAATGTCCTCT	0	0	0	0	0	0	0	0	0	0	0	0	0	0	0	0.336655	0	0	0	0	0	0	0	0	0	0	0	0	0	0	0	0	0	0	0	0	0	0	0	0	0	0	0	0	0	0
40	NODE_38595_length_320_cov_0.631579_g37876_i0	320	GGTAGACTCTCCACCAAAAGCTGAGAACACACAGAGGCAGCAATTGTTCCNNNNNNNNNNNNNNNNNNNNNNNNNNNNNNNNNNNNNNNNNNNNNNNNNNNNNNNNNNNNNNNNNNNNNNNNNNNNNNNNNNNNNNNNNNNNNNNNNNNNNNNNNNNNNNNNNNNNNNNNNNNNNNNNNNNNNNNNNNNNNNNNNNNNNNNNNNNNNNNNNNNNNNNNNNNNNNNNNNNNNNNNNNNNNNNNNNNNNNNNNNNNNNNNNNNNNNNNNNNNTTCCACAGACACGGCAACCTCAGTCCTGAGCCTGAACCAGGCAGAGAAGA	0	0	0	0	0	0	0	0	0	0	0	0	0	0	0	0	0	0	0	0	0	0	0	0	0	0	0	0	0	0	0	0	0	0	0	0	0	0.188563	0	0	0	0	0	0	0	0
41	NODE_38608_length_320_cov_0.631579_g37889_i0	320	TACTCTATTAGAGACAATTTCTGGTATCTTCTCACCAATGCTTGGTGTTANNNNNNNNNNNNNNNNNNNNNNNNNNNNNNNNNNNNNNNNNNNNNNNNNNNNNNNNNNNNNNNNNNNNNNNNNNNNNNNNNNNNNNNNNNNNNNNNNNNNNNNNNNNNNNNNNNNNNNNNNNNNNNNNNNNNNNNNNNNNNNNNNNNNNNNNNNNNNNNNNNNNNNNNNNNNNNNNNNNNNNNNNNNNNNNNNNNNNNNNNNNNNNNNNNNNNNNNNNNNGTATGTTGAAGGCATTACTTATTCTATGCACTACATTGAATATACTAACT	0	0	0	0	0	0	0	0	0	0	0	0	0	0	0	0	0	0	0	0	0	0	0	0	0	0	0	0	0	0	0	0	0	0	0	0	0	0.189828	0	0	0	0	0	0	0	0
42	NODE_38609_length_320_cov_0.631579_g37890_i0	320	GTAGCCGTCAAGCTCCACGACCACCCACCCCTCGATCACCAAATCCACCTNNNNNNNNNNNNNNNNNNNNNNNNNNNNNNNNNNNNNNNNNNNNNNNNNNNNNNNNNNNNNNNNNNNNNNNNNNNNNNNNNNNNNNNNNNNNNNNNNNNNNNNNNNNNNNNNNNNNNNNNNNNNNNNNNNNNNNNNNNNNNNNNNNNNNNNNNNNNNNNNNNNNNNNNNNNNNNNNNNNNNNNNNNNNNNNNNNNNNNNNNNNNNNNNNNNNNNNNNNNNCGTCCTCGAAGCTCAACCCCGCGGCCTCAAGGTCGATTCGCGCCAGAGTC	0	0	0	0	0	0	0	0	0	0	0	0	0	0	0	0	0	0	0	0	0	0	0	0	0	0	0	0	0	0	0	0	0	0	0	0	0	0.189828	0	0	0	0	0	0	0	0
43	NODE_38613_length_320_cov_0.631579_g37894_i0	320	TGAATATCATGAGTGAAAATGAGAGTCAAAACAAAAATCAGATTGCACTANNNNNNNNNNNNNNNNNNNNNNNNNNNNNNNNNNNNNNNNNNNNNNNNNNNNNNNNNNNNNNNNNNNNNNNNNNNNNNNNNNNNNNNNNNNNNNNNNNNNNNNNNNNNNNNNNNNNNNNNNNNNNNNNNNNNNNNNNNNNNNNNNNNNNNNNNNNNNNNNNNNNNNNNNNNNNNNNNNNNNNNNNNNNNNNNNNNNNNNNNNNNNNNNNNNNNNNNNNNNTTGTTTCAAAGGTCGAAAAACTAGTAGCCTTAAGACACATTAGCTTTGTA	0	0	0	0	0	0	0	0	0	0	0	0	0	0	0	0	0	0	0	0	0	0	0	0	0	0	0	0	0	0	0	0	0	0	0	0	0	0.189512	0	0	0	0	0	0	0	0
44	NODE_38614_length_320_cov_0.631579_g37895_i0	320	AATTGCGCGAATATTCAAAAGTCTTGAGAGATCTGATGAATGCTGGTGGCNNNNNNNNNNNNNNNNNNNNNNNNNNNNNNNNNNNNNNNNNNNNNNNNNNNNNNNNNNNNNNNNNNNNNNNNNNNNNNNNNNNNNNNNNNNNNNNNNNNNNNNNNNNNNNNNNNNNNNNNNNNNNNNNNNNNNNNNNNNNNNNNNNNNNNNNNNNNNNNNNNNNNNNNNNNNNNNNNNNNNNNNNNNNNNNNNNNNNNNNNNNNNNNNNNNNNNNNNNNNGACATTCAAGCTAAAGTCGATGAACAGATGGGTGAAATTTACAACATTGT	0	0	0	0	0	0	0	0	0	0	0	0	0	0	0	0	0	0	0	0	0	0	0	0	0	0	0	0	0	0	0	0	0	0	0	0	0	0.189828	0	0	0	0	0	0	0	0
45	NODE_38616_length_320_cov_0.631579_g37897_i0	320	TACAAAGAACATAACACCACTGTTCGATAGAGTACATTCTCAGCTACAAANNNNNNNNNNNNNNNNNNNNNNNNNNNNNNNNNNNNNNNNNNNNNNNNNNNNNNNNNNNNNNNNNNNNNNNNNNNNNNNNNNNNNNNNNNNNNNNNNNNNNNNNNNNNNNNNNNNNNNNNNNNNNNNNNNNNNNNNNNNNNNNNNNNNNNNNNNNNNNNNNNNNNNNNNNNNNNNNNNNNNNNNNNNNNNNNNNNNNNNNNNNNNNNNNNNNNNNNNNNNGTCTGTTCTCACTGGTGATAGGACAACGGGACATGGCCTCAAGTTACGCC	0	0	0	0	0	0	0	0	0	0	0	0	0	0	0	0	0	0	0	0	0	0	0	0	0	0	0	0	0	0	0	0	0	0	0	0	0	0.189828	0	0	0	0	0	0	0	0
46	NODE_38620_length_320_cov_0.631579_g37901_i0	320	CAATATTTGGTATGTAAGTTCGGATTGGCATTTCCTTGAAAGCTTTTTTGNNNNNNNNNNNNNNNNNNNNNNNNNNNNNNNNNNNNNNNNNNNNNNNNNNNNNNNNNNNNNNNNNNNNNNNNNNNNNNNNNNNNNNNNNNNNNNNNNNNNNNNNNNNNNNNNNNNNNNNNNNNNNNNNNNNNNNNNNNNNNNNNNNNNNNNNNNNNNNNNNNNNNNNNNNNNNNNNNNNNNNNNNNNNNNNNNNNNNNNNNNNNNNNNNNNNNNNNNNNNACTTTGCAGAAAAAACGGCTCTAACGATTTTCTTTAAACTTTTACCAATG	0	0	0	0	0	0	0	0	0	0	0	0	0	0	0	0.336655	0	0	0	0	0	0	0	0	0	0	0	0	0	0	0	0	0	0	0	0	0	0	0	0	0	0	0	0	0	0
47	NODE_38627_length_320_cov_0.631579_g37908_i0	320	GTGTCCTCGACGTAGAGCATCCCGTTGGTGTGTGACTTGATGACCTGCATNNNNNNNNNNNNNNNNNNNNNNNNNNNNNNNNNNNNNNNNNNNNNNNNNNNNNNNNNNNNNNNNNNNNNNNNNNNNNNNNNNNNNNNNNNNNNNNNNNNNNNNNNNNNNNNNNNNNNNNNNNNNNNNNNNNNNNNNNNNNNNNNNNNNNNNNNNNNNNNNNNNNNNNNNNNNNNNNNNNNNNNNNNNNNNNNNNNNNNNNNNNNNNNNNNNNNNNNNNNNGCGCAGCACCTCGGACGCCTTGAACTTCACGTTCGGGCGGAACTCCACCA	0	0	0	0	0	0	0	0	0	0	0	0	0	0	0	0	0	0	0	0	0	0	0	0	0	0	0	0	0	0	0	0	0	0	0	0	0	0	0	0	0	0	0	0	0	0
48	NODE_38631_length_320_cov_0.631579_g37912_i0	320	AGAACAACAAGCCAAGTCCAATAGTTTTGAAATAATTCTTTAAACTATTTNNNNNNNNNNNNNNNNNNNNNNNNNNNNNNNNNNNNNNNNNNNNNNNNNNNNNNNNNNNNNNNNNNNNNNNNNNNNNNNNNNNNNNNNNNNNNNNNNNNNNNNNNNNNNNNNNNNNNNNNNNNNNNNNNNNNNNNNNNNNNNNNNNNNNNNNNNNNNNNNNNNNNNNNNNNNNNNNNNNNNNNNNNNNNNNNNNNNNNNNNNNNNNNNNNNNNNNNNNNNGAAAACATACATCGATACATGGGGCATGTAAAGATGAGATCGCCAAGATA	0	0	0	0	0	0	0	0	0	0	0	0	0	0	0	0.336655	0	0	0	0	0	0	0	0	0	0	0	0	0	0	0	0	0	0	0	0	0	0	0	0	0	0	0	0	0	0
49	NODE_38634_length_320_cov_0.631579_g37915_i0	320	TGATTATAGTATATCATAAAATTATGCATACATCAATGTATATTGATATANNNNNNNNNNNNNNNNNNNNNNNNNNNNNNNNNNNNNNNNNNNNNNNNNNNNNNNNNNNNNNNNNNNNNNNNNNNNNNNNNNNNNNNNNNNNNNNNNNNNNNNNNNNNNNNNNNNNNNNNNNNNNNNNNNNNNNNNNNNNNNNNNNNNNNNNNNNNNNNNNNNNNNNNNNNNNNNNNNNNNNNNNNNNNNNNNNNNNNNNNNNNNNNNNNNNNNNNNNNNGCGTTTTGATTATGTTGTTTCTAACGCTCAAAATGAGCGTTAGAACTTAT	0	0	0	0	0	0	0	0	0	0	0	0	0	0	0	0	0	0	0	0	0	0	0	0	0	0	0	0	0	0	0	0	0	0	0	0	0	0.189828	0	0	0	0	0	0	0	0
50	NODE_38636_length_320_cov_0.631579_g37917_i0	320	GCTGAAGCTCCTGAGGCAATACAGATGCTAGTAGTACTTTGGCACGTGGCNNNNNNNNNNNNNNNNNNNNNNNNNNNNNNNNNNNNNNNNNNNNNNNNNNNNNNNNNNNNNNNNNNNNNNNNNNNNNNNNNNNNNNNNNNNNNNNNNNNNNNNNNNNNNNNNNNNNNNNNNNNNNNNNNNNNNNNNNNNNNNNNNNNNNNNNNNNNNNNNNNNNNNNNNNNNNNNNNNNNNNNNNNNNNNNNNNNNNNNNNNNNNNNNNNNNNNNNNNNNAGGAGCTGAGGATTTTGGAGGAGCAGGAGCAGCGTGAGGAATTGGCCGTG	0	0	0	0	0	0	0	0	0	0	0	0	0	0	0	0	0	0	0	0	0	0	0	0	0	0	0	0	0	0	0	0	0	0	0	0	0	0.189828	0	0	0	0	0	0	0	0
51	NODE_38637_length_320_cov_0.631579_g37918_i0	320	TGAATACGACTTCATGCTCCCTAACCATCGGTATGACTGTTTCAATCAGANNNNNNNNNNNNNNNNNNNNNNNNNNNNNNNNNNNNNNNNNNNNNNNNNNNNNNNNNNNNNNNNNNNNNNNNNNNNNNNNNNNNNNNNNNNNNNNNNNNNNNNNNNNNNNNNNNNNNNNNNNNNNNNNNNNNNNNNNNNNNNNNNNNNNNNNNNNNNNNNNNNNNNNNNNNNNNNNNNNNNNNNNNNNNNNNNNNNNNNNNNNNNNNNNNNNNNNNNNNNAACCCAACCTCGAATGATTTCACCATTACTCAATGCTCCTATCCTTTGAA	0	0	0	0	0	0	0	0	0	0	0	0	0	0	0	0	0	0	0	0	0	0	0	0	0	0	0	0	0	0	0	0	0	0	0	0	0	0.189828	0	0	0	0	0	0	0	0
52	NODE_38639_length_320_cov_0.631579_g37920_i0	320	ACGCGGACACCCAGGTGGAAGTCTTGAACCGCGTGGTGGATGGCGAGGAGNNNNNNNNNNNNNNNNNNNNNNNNNNNNNNNNNNNNNNNNNNNNNNNNNNNNNNNNNNNNNNNNNNNNNNNNNNNNNNNNNNNNNNNNNNNNNNNNNNNNNNNNNNNNNNNNNNNNNNNNNNNNNNNNNNNNNNNNNNNNNNNNNNNNNNNNNNNNNNNNNNNNNNNNNNNNNNNNNNNNNNNNNNNNNNNNNNNNNNNNNNNNNNNNNNNNNNNNNNNNGTCAGGATGAGCGCAAGGTAGAGCGAGAGATCTTCGCTGAGGTCCGGCTC	0	0	0	0	0	0	0	0	0	0	0	0	0	0	0	0.336655	0	0	0	0	0	0	0	0	0	0	0	0	0	0	0	0	0	0	0	0	0	0	0	0	0	0	0	0	0	0
53	NODE_38642_length_320_cov_0.631579_g37923_i0	320	CCCATCGTGACCAGGTGGGTCGCGCCCCGCACCATCGCGTCCGTGAGGAGNNNNNNNNNNNNNNNNNNNNNNNNNNNNNNNNNNNNNNNNNNNNNNNNNNNNNNNNNNNNNNNNNNNNNNNNNNNNNNNNNNNNNNNNNNNNNNNNNNNNNNNNNNNNNNNNNNNNNNNNNNNNNNNNNNNNNNNNNNNNNNNNNNNNNNNNNNNNNNNNNNNNNNNNNNNNNNNNNNNNNNNNNNNNNNNNNNNNNNNNNNNNNNNNNNNNNNNNNNNNGAGGAGCTGCGGCGTTGCCGCGGACAGATCGATCCCGACCTCCGCCATGG	0	0	0	0	0	0	0	0	0	0	0	0	0	0	0	0	0	0	0	0	0	0	0	0	0	0	0	0	0	0	0	0	0	0	0	0	0	0.189828	0	0	0	0	0	0	0	0
54	NODE_38644_length_320_cov_0.631579_g37925_i0	320	CGCCTCCACCTAGCGCAATAAGTAAATCAGTTCTTGTAATCTTAGCTTCTNNNNNNNNNNNNNNNNNNNNNNNNNNNNNNNNNNNNNNNNNNNNNNNNNNNNNNNNNNNNNNNNNNNNNNNNNNNNNNNNNNNNNNNNNNNNNNNNNNNNNNNNNNNNNNNNNNNNNNNNNNNNNNNNNNNNNNNNNNNNNNNNNNNNNNNNNNNNNNNNNNNNNNNNNNNNNNNNNNNNNNNNNNNNNNNNNNNNNNNNNNNNNNNNNNNNNNNNNNNNTCTCCATGAGGAATGACTACTGTAGAGACTTCATAAATATCTTTTAACTG	0	0	0	0	0	0	0	0	0	0	0	0	0	0	0	0	0	0	0	0	0	0	0	0	0	0	0	0	0	0	0	0	0	0	0	0	0	0.189828	0	0	0	0	0	0	0	0
55	NODE_38645_length_320_cov_0.631579_g37926_i0	320	GGGATCACATCCCTAGGATTTCCATAAGAAATAAATGGCTCAAGTTCCTGNNNNNNNNNNNNNNNNNNNNNNNNNNNNNNNNNNNNNNNNNNNNNNNNNNNNNNNNNNNNNNNNNNNNNNNNNNNNNNNNNNNNNNNNNNNNNNNNNNNNNNNNNNNNNNNNNNNNNNNNNNNNNNNNNNNNNNNNNNNNNNNNNNNNNNNNNNNNNNNNNNNNNNNNNNNNNNNNNNNNNNNNNNNNNNNNNNNNNNNNNNNNNNNNNNNNNNNNNNNNTGCACAATCACCAGCCTGCTGCAAGGAAACCTGATTACATATCCCTGTAT	0	0	0	0	0	0	0	0	0	0	0	0	0	0	0	0	0	0	0	0	0	0	0	0	0	0	0	0	0	0	0	0	0	0	0	0	0	0.189512	0	0	0	0	0	0	0	0
56	NODE_38648_length_320_cov_0.631579_g37929_i0	320	TTTCTTTCTTTCCCTTGTCATACAGAAACTCCAAAGAATGAATAATGTAGNNNNNNNNNNNNNNNNNNNNNNNNNNNNNNNNNNNNNNNNNNNNNNNNNNNNNNNNNNNNNNNNNNNNNNNNNNNNNNNNNNNNNNNNNNNNNNNNNNNNNNNNNNNNNNNNNNNNNNNNNNNNNNNNNNNNNNNNNNNNNNNNNNNNNNNNNNNNNNNNNNNNNNNNNNNNNNNNNNNNNNNNNNNNNNNNNNNNNNNNNNNNNNNNNNNNNNNNNNNNAAGTTGAAATTCTAATTCTGTAATTTCTTTACTGTGATGTTTGGAATGTT	0	0	0	0	0	0	0	0	0	0	0	0	0	0	0	0.336655	0	0	0	0	0	0	0	0	0	0	0	0	0	0	0	0	0	0	0	0	0	0	0	0	0	0	0	0	0	0
57	NODE_38652_length_320_cov_0.631579_g37933_i0	320	ATATTCGGGTAAGCTGGGGTGTGTCCCAATGGTTCTCTATTTAGTAGTAGNNNNNNNNNNNNNNNNNNNNNNNNNNNNNNNNNNNNNNNNNNNNNNNNNNNNNNNNNNNNNNNNNNNNNNNNNNNNNNNNNNNNNNNNNNNNNNNNNNNNNNNNNNNNNNNNNNNNNNNNNNNNNNNNNNNNNNNNNNNNNNNNNNNNNNNNNNNNNNNNNNNNNNNNNNNNNNNNNNNNNNNNNNNNNNNNNNNNNNNNNNNNNNNNNNNNNNNNNNNNGATCTCTAAGTTTCAAGTTGACATTGATATATTGAGTTGTGTCCTTTTAG	0	0	0	0	0	0	0	0	0	0	0	0	0	0	0	0.336655	0	0	0	0	0	0	0	0	0	0	0	0	0	0	0	0	0	0	0	0	0	0	0	0	0	0	0	0	0	0
58	NODE_38653_length_320_cov_0.631579_g37934_i0	320	GAAGCCACATCATTTTGCTTACCTGTATTCTTACTCCTTCTTGTAACCGGNNNNNNNNNNNNNNNNNNNNNNNNNNNNNNNNNNNNNNNNNNNNNNNNNNNNNNNNNNNNNNNNNNNNNNNNNNNNNNNNNNNNNNNNNNNNNNNNNNNNNNNNNNNNNNNNNNNNNNNNNNNNNNNNNNNNNNNNNNNNNNNNNNNNNNNNNNNNNNNNNNNNNNNNNNNNNNNNNNNNNNNNNNNNNNNNNNNNNNNNNNNNNNNNNNNNNNNNNNNNTTCAATGGTTAAATATGACTTCACCTACAACATGGTCTCCATTGCACGAT	0	0	0	0	0	0	0	0	0	0	0	0	0	0	0	0.336655	0	0	0	0	0	0	0	0	0	0	0	0	0	0	0	0	0	0	0	0	0	0	0	0	0	0	0	0	0	0
59	NODE_38655_length_320_cov_0.631579_g37936_i0	320	TCTTCTGAGCAGCAGAGCCCGTTGTCTGTTGTACCTGAAGTTAAACTCCTNNNNNNNNNNNNNNNNNNNNNNNNNNNNNNNNNNNNNNNNNNNNNNNNNNNNNNNNNNNNNNNNNNNNNNNNNNNNNNNNNNNNNNNNNNNNNNNNNNNNNNNNNNNNNNNNNNNNNNNNNNNNNNNNNNNNNNNNNNNNNNNNNNNNNNNNNNNNNNNNNNNNNNNNNNNNNNNNNNNNNNNNNNNNNNNNNNNNNNNNNNNNNNNNNNNNNNNNNNNNTAGTCCAGTGGTTTATGACTTTCATTTTTGTCCTGTACCAACTAGCACAG	0	0	0	0	0	0	0	0	0	0	0	0	0	0	0	0	0	0	0	0	0	0	0	0	0	0	0	0	0	0	0	0	0	0	0	0	0	0.189828	0	0	0	0	0	0	0	0
60	NODE_38657_length_320_cov_0.631579_g37938_i0	320	CAAAACACCTCGGTTGTGGGTCGCATAGTGATTCCTTTACTGTTAGGGCGNNNNNNNNNNNNNNNNNNNNNNNNNNNNNNNNNNNNNNNNNNNNNNNNNNNNNNNNNNNNNNNNNNNNNNNNNNNNNNNNNNNNNNNNNNNNNNNNNNNNNNNNNNNNNNNNNNNNNNNNNNNNNNNNNNNNNNNNNNNNNNNNNNNNNNNNNNNNNNNNNNNNNNNNNNNNNNNNNNNNNNNNNNNNNNNNNNNNNNNNNNNNNNNNNNNNNNNNNNNNGGGATGATCTTAGGCGCTGACTCCTCCGGAGTGTCACAGTAAGCCATAGG	0	0	0	0	0	0	0	0	0	0	0	0	0	0	0	0	0	0	0	0	0	0	0	0	0	0	0	0	0	0	0	0	0	0	0	0	0	0	0	0	0	0	0	0	0	0
61	NODE_38666_length_320_cov_0.631579_g37947_i0	320	TTCAAGCACTTTTTCTGTAATTGCTGAAATATTTATACCAGCATTCTTGGNNNNNNNNNNNNNNNNNNNNNNNNNNNNNNNNNNNNNNNNNNNNNNNNNNNNNNNNNNNNNNNNNNNNNNNNNNNNNNNNNNNNNNNNNNNNNNNNNNNNNNNNNNNNNNNNNNNNNNNNNNNNNNNNNNNNNNNNNNNNNNNNNNNNNNNNNNNNNNNNNNNNNNNNNNNNNNNNNNNNNNNNNNNNNNNNNNNNNNNNNNNNNNNNNNNNNNNNNNNNCAAGGTCAATTTCTGCTTCGGCTGTTTTTCGGTCCCTGCTGACATACGTA	0	0	0	0	0	0	0	0	0	0	0	0	0	0	0	0	0	0	0	0	0	0	0	0	0	0	0	0	0	0	0	0	0	0	0	0	0	0.189828	0	0	0	0	0	0	0	0
62	NODE_38669_length_320_cov_0.631579_g37950_i0	320	GTCAACTCCATGTAGGCTGTACTCGTCGATGTATCTATGGTCATACTGATNNNNNNNNNNNNNNNNNNNNNNNNNNNNNNNNNNNNNNNNNNNNNNNNNNNNNNNNNNNNNNNNNNNNNNNNNNNNNNNNNNNNNNNNNNNNNNNNNNNNNNNNNNNNNNNNNNNNNNNNNNNNNNNNNNNNNNNNNNNNNNNNNNNNNNNNNNNNNNNNNNNNNNNNNNNNNNNNNNNNNNNNNNNNNNNNNNNNNNNNNNNNNNNNNNTGATTCTGCCCCGGAAATTCTCTGCATAATTTGTCTTACCATTGTTAAGTCTGATCCATC	0	0	0	0	0	0	0	0	0	0	0	0	0	0	0	0	0	0	0	0	0	0	0	0	0	0	0	0	0	0	0	0	0	0	0	0	0	0.15819	0	0	0	0	0	0	0	0
63	NODE_38673_length_320_cov_0.631579_g37954_i0	320	AGTCTGAGAGAGGCGGAATACGGAACGGTGCGTGCACGCGTTCTCCTCTTNNNNNNNNNNNNNNNNNNNNNNNNNNNNNNNNNNNNNNNNNNNNNNNNNNNNNNNNNNNNNNNNNNNNNNNNNNNNNNNNNNNNNNNNNNNNNNNNNNNNNNNNNNNNNNNNNNNNNNNNNNNNNNNNNNNNNNNNNNNNNNNNNNNNNNNNNNNNNNNNNNNNNNNNNNNNNNNNNNNNNNNNNNNNNNNNNNNNNNNNNNNNNNNNNNNNNNNNNNNNTTGCATCTGCAAGCCACCTGGAGCTCTTCCGGAGCTAAAACACGGTCTCG	0	0	0	0	0	0	0	0	0	0	0	0	0	0	0	0	0	0	0	0	0	0	0	0	0	0	0	0	0	0	0	0	0	0	0	0	0	0.189196	0	0	0	0	0	0	0	0
64	NODE_38674_length_320_cov_0.631579_g37955_i0	320	ATGGTCTGCATCAAATTGTAATACCCGTCTATCGGCAGACAATGATGCTTNNNNNNNNNNNNNNNNNNNNNNNNNNNNNNNNNNNNNNNNNNNNNNNNNNNNNNNNNNNNNNNNNNNNNNNNNNNNNNNNNNNNNNNNNNNNNNNNNNNNNNNNNNNNNNNNNNNNNNNNNNNNNNNNNNNNNNNNNNNNNNNNNNNNNNNNNNNNNNNNNNNNNNNNNNNNNNNNNNNNNNNNNNNNNNNNNNNNNNNNNNNNNNNNNNNNNNNNNNNNTCCCGGTTAAACATCGTGCAAAAAATGTGCATTTTCCAAGTTGGACAAAG	0	0	0	0	0	0	0	0	0	0	0	0	0	0	0	0	0	0	0	0	0	0	0	0	0	0	0	0	0	0	0	0	0	0	0	0	0	0.189512	0	0	0	0	0	0	0	0
65	NODE_38678_length_320_cov_0.631579_g37959_i0	320	CGCCTGTCATTATATCACGTATTTAAAATGTTTGGATTGAAGTGATGCATNNNNNNNNNNNNNNNNNNNNNNNNNNNNNNNNNNNNNNNNNNNNNNNNNNNNNNNNNNNNNNNNNNNNNNNNNNNNNNNNNNNNNNNNNNNNNNNNNNNNNNNNNNNNNNNNNNNNNNNNNNNNNNNNNNNNNNNNNNNNNNNNNNNNNNNNNNNNNNNNNNNNNNNNNNNNNNNNNNNNNNNNNNNNNNNNNNNNNNNNNNNNNNNNNNNNNNNNNNNNAGAAGTATTAGACATTATAAATGCTAATTCAGAGACAACCATGTCCTTTT	0	0	0	0	0	0	0	0	0	0	0	0	0	0	0	0	0	0	0	0	0	0	0	0	0	0	0	0	0	0	0	0	0	0	0	0	0	0.189828	0	0	0	0	0	0	0	0
66	NODE_38680_length_320_cov_0.631579_g37961_i0	320	GAGACAGATCTCTCCTCTCATTCAGACTGGAAACAGATCTCTCCTCTCATNNNNNNNNNNNNNNNNNNNNNNNNNNNNNNNNNNNNNNNNNNNNNNNNNNNNNNNNNNNNNNNNNNNNNNNNNNNNNNNNNNNNNNNNNNNNNNNNNNNNNNNNNNNNNNNNNNNNNNNNNNNNNNNNNNNNNNNNNNNNNNNNNNNNNNNNNNNNNNNNNNNNNNNNNNNNNNNNNNNNNNNNNNNNNNNNNNNNNNNNNNNNNNNNNNNNNNNNNNNNCTCATTCAGACTGGAGACAGATCTCTCCTCTCATTCAGACTGGAGACAGA	0	0	0	0	0	0	0	0	0	0	0	0	0	0	0	0	0	0	0	0	0	0	0	0	0	0	0	0	0	0	0	0	0	0	0	0	0	0.189828	0	0	0	0	0	0	0	0
67	NODE_38687_length_320_cov_0.631579_g37968_i0	320	CTTCTTGCTCTTGTGAGAGGGTTATTGCAACCCTTGAACTTGGGGAACTTNNNNNNNNNNNNNNNNNNNNNNNNNNNNNNNNNNNNNNNNNNNNNNNNNNNNNNNNNNNNNNNNNNNNNNNNNNNNNNNNNNNNNNNNNNNNNNNNNNNNNNNNNNNNNNNNNNNNNNNNNNNNNNNNNNNNNNNNNNNNNNNNNNNNNNNNNNNNNNNNNNNNNNNNNNNNNNNNNNNNNNNNNNNNNNNNNNNNNNNNNNNNNNNNNNNNNNNNNNNNGTTCTTGGATTTCTTGGAGAAGGATTTTAGATTTAATCTTGAGGGAGAAA	0	0	0	0	0	0	0	0	0	0	0	0	0	0	0	0.336655	0	0	0	0	0	0	0	0	0	0	0	0	0	0	0	0	0	0	0	0	0	0	0	0	0	0	0	0	0	0
68	NODE_38689_length_320_cov_0.631579_g37970_i0	320	TCTTGGCTTTGAAAGCTTCAGACAGTGATGAAGAAATTGAACTTGACAAGNNNNNNNNNNNNNNNNNNNNNNNNNNNNNNNNNNNNNNNNNNNNNNNNNNNNNNNNNNNNNNNNNNNNNNNNNNNNNNNNNNNNNNNNNNNNNNNNNNNNNNNNNNNNNNNNNNNNNNNNNNNNNNNNNNNNNNNNNNNNNNNNNNNNNNNNNNNNNNNNNNNNNNNNNNNNNNNNNNNNNNNNNNNNNNNNNNNNNNNNNNNNNNNNNNNNNNNNNNNNAAAGGAAACAGGTAACAAAAACCGTTCCAATGACAGTCGAAATAGATGCT	0	0	0	0	0	0	0	0	0	0	0	0	0	0	0	0.336655	0	0	0	0	0	0	0	0	0	0	0	0	0	0	0	0	0	0	0	0	0	0	0	0	0	0	0	0	0	0
69	NODE_38694_length_320_cov_0.631579_g37975_i0	320	GCGATGCCGACTGGGATTTCGGGGCCCACTTCGAGCCGTTCCAACAGCTCNNNNNNNNNNNNNNNNNNNNNNNNNNNNNNNNNNNNNNNNNNNNNNNNNNNNNNNNNNNNNNNNNNNNNNNNNNNNNNNNNNNNNNNNNNNNNNNNNNNNNNNNNNNNNNNNNNNNNNNNNNNNNNNNNNNNNNNNNNNNNNNNNNNNNNNNNNNNNNNNNNNNNNNNNNNNNNNNNNNNNNNNNNNNNNNNNNNNNNNNNNNNNNNNNNNNNNNNNNNNCCTCGGCAACGGCGTCAGGCGTGGCAGGCTTGGGGGTTTCAATGCGGATT	0	0	0	0	0	0	0	0	0	0	0	0	0	0	0	0.336655	0	0	0	0	0	0	0	0	0	0	0	0	0	0	0	0	0	0	0	0	0	0	0	0	0	0	0	0	0	0
70	NODE_38696_length_320_cov_0.631579_g37977_i0	320	TTTCTCATATGAGTTTTCTTATATCTATTATTTCTATATCCTTAAGTATANNNNNNNNNNNNNNNNNNNNNNNNNNNNNNNNNNNNNNNNNNNNNNNNNNNNNNNNNNNNNNNNNNNNNNNNNNNNNNNNNNNNNNNNNNNNNNNNNNNNNNNNNNNNNNNNNNNNNNNNNNNNNNNNNNNNNNNNNNNNNNNNNNNNNNNNNNNNNNNNNNNNNNNNNNNNNNNNNNNNNNNNNNNNNNNNNNNNNNNNNNNNNNNNNNNNNNNNNNNNAGTTAGTCATTTTATTTCATATGATGCTTATTTCAAAATATTTTCTTCAA	0	0	0	0	0	0	0	0	0	0	0	0	0	0	0	0.336655	0	0	0	0	0	0	0	0	0	0	0	0	0	0	0	0	0	0	0	0	0	0	0	0	0	0	0	0	0	0
71	NODE_38702_length_320_cov_0.631579_g37983_i0	320	CGCGCAGCCGCAGCGTGGTCACGCAGGTCTTCTCGACGATGCTCTCCGCCNNNNNNNNNNNNNNNNNNNNNNNNNNNNNNNNNNNNNNNNNNNNNNNNNNNNNNNNNNNNNNNNNNNNNNNNNNNNNNNNNNNNNNNNNNNNNNNNNNNNNNNNNNNNNNNNNNNNNNNNNNNNNNNNNNNNNNNNNNNNNNNNNNNNNNNNNNNNNNNNNNNNNNNNNNNNNNNNNNNNNNNNNNNNNNNNNNNNNNNNNNNNNNNNNNNNNNNNNNNNTCCTGTACATGATGCTCAGGCCGAAGGAAACTCTAGATTTGACATTCCAG	0	0	0	0	0	0	0	0	0	0	0	0	0	0	0	0	0	0	0	0	0	0	0	0	0	0	0	0	0	0	0	0	0	0	0	0	0	0.189828	0	0	0	0	0	0	0	0
72	NODE_38704_length_320_cov_0.631579_g37985_i0	320	ACATATATTGTATCTGAGATCGTACTGAAACTGAATACTGAGTTCTGATANNNNNNNNNNNNNNNNNNNNNNNNNNNNNNNNNNNNNNNNNNNNNNNNNNNNNNNNNNNNNNNNNNNNNNNNNNNNNNNNNNNNNNNNNNNNNNNNNNNNNNNNNNNNNNNNNNNNNNNNNNNNNNNNNNNNNNNNNNNNNNNNNNNNNNNNNNNNNNNNNNNNNNNNNNNNNNNNNNNNNNNNNNNNNNNNNNNNNNNNNNNNNNNNNNNNNNNNNNNNATATCTGAGTTTATTGATAACTATGTTACTGATAACTGGGTGACTATTTT	0	0	0	0	0	0	0	0	0	0	0	0	0	0	0	0.336655	0	0	0	0	0	0	0	0	0	0	0	0	0	0	0	0	0	0	0	0	0	0	0	0	0	0	0	0	0	0
73	NODE_38707_length_320_cov_0.631579_g37988_i0	320	TGATTAAATTAACACAATTAGAAATAGACGAGTGTCTAAATTGGATTTTANNNNNNNNNNNNNNNNNNNNNNNNNNNNNNNNNNNNNNNNNNNNNNNNNNNNNNNNNNNNNNNNNNNNNNNNNNNNNNNNNNNNNNNNNNNNNNNNNNNNNNNNNNNNNNNNNNNNNNNNNNNNNNNNNNNNNNNNNNNNNNNNNNNNNNNNNNNNNNNNNNNNNNNNNNNNNNNNNNNNNNNNNNNNNNNNNNNNNNNNNNNNNNNNNNNNNNNNNNNNGGAAGATCAGGGATTAGAATTCATAGTAATTAGTGCAAAAGATTATTACA	0	0	0	0	0	0	0	0	0	0	0	0	0	0	0	0	0	0	0	0	0	0	0	0	0	0	0	0	0	0	0	0	0	0	0	0	0	0.189828	0	0	0	0	0	0	0	0
74	NODE_38711_length_320_cov_0.631579_g37992_i0	320	CGCTACAGGGAAGCAAAGAACACGGTGGATGGATTGAACGTTCCCGATGTNNNNNNNNNNNNNNNNNNNNNNNNNNNNNNNNNNNNNNNNNNNNNNNNNNNNNNNNNNNNNNNNNNNNNNNNNNNNNNNNNNNNNNNNNNNNNNNNNNNNNNNNNNNNNNNNNNNNNNNNNNNNNNNNNNNNNNNNNNNNNNNNNNNNNNNNNNNNNNNNNNNNNNNNNNNNNNNNNNNNNNNNNNNNNNNNNNNNNNNNNNNNNNNNNNNNNNNNNNNNGTGAGAGTGTTGACGAAATTTCGGAAAGTTTTGTCCATGTTTCGGAAAAT	0	0	0	0	0	0	0	0	0	0	0	0	0	0	0	0	0	0	0	0	0	0	0	0	0	0	0	0	0	0	0	0	0	0	0	0	0	0.189828	0	0	0	0	0	0	0	0
75	NODE_38721_length_320_cov_0.631579_g38002_i0	320	TTTTATAACAATCCTGATGAATCAGCAGCCGCAGAAGATTGGGAAGCTTTNNNNNNNNNNNNNNNNNNNNNNNNNNNNNNNNNNNNNNNNNNNNNNNNNNNNNNNNNNNNNNNNNNNNNNNNNNNNNNNNNNNNNNNNNNNNNNNNNNNNNNNNNNNNNNNNNNNNNNNNNNNNNNNNNNNNNNNNNNNNNNNNNNNNNNNNNNNNNNNNNNNNNNNNNNNNNNNNNNNNNNNNNNNNNNNNNNNNNNNNNNNNNNNNNNNNNNNNNNNNGGATCTATGCCTCCCTTAACCTTCATGACTAGAGCTTACGAAGAAATTAT	0	0	0	0	0	0	0	0	0	0	0	0	0	0	0	0.336655	0	0	0	0	0	0	0	0	0	0	0	0	0	0	0	0	0	0	0	0	0	0	0	0	0	0	0	0	0	0
76	NODE_38728_length_320_cov_0.628070_g38009_i0	320	CAGCCGCATGGGCGGACGACATCACCACTGGGCCAGCGAGCATCGTCGCTNNNNNNNNNNNNNNNNNNNNNNNNNNNNNNNNNNNNNNNNNNNNNNNNNNNNNNNNNNNNNNNNNNNNNNNNNNNNNNNNNNNNNNNNNNNNNNNNNNNNNNNNNNNNNNNNNNNNNNNNNNNNNNNNNNNNNNNNNNNNNNNNNNNNNNNNNNNNNNNNNNNNNNNNNNNNNNNNNNNNNNNNNNNNNNNNNNNNNNNNNNNNNNNNNNNNNNNNNNNNCATGTAATGCGCCGGCTTATTGTCTGCGGTCCTGATTTTTGGACAGCCGA	0	0	0	0	0	0	0	0	0	0	0	0	0	0	0	0	0	0	0	0	0	0	0	0	0	0	0	0	0	0	0	0	0	0	0	0	0	0	0	0	0	0	0	0	0	0
77	NODE_38734_length_320_cov_0.628070_g38015_i0	320	GATCTGAGAGCGAGCATTAATTTGATGCCACTGACTGTATATAGAAAGATNNNNNNNNNNNNNNNNNNNNNNNNNNNNNNNNNNNNNNNNNNNNNNNNNNNNNNNNNNNNNNNNNNNNNNNNNNNNNNNNNNNNNNNNNNNNNNNNNNNNNNNNNNNNNNNNNNNNNNNNNNNNNNNNNNNNNNNNNNNNNNNNNNNNNNNNNNNNNNNNNNNNNNNNNNNNNNNNNNNNNNNNNNNNNNNNNNNNNNNNNNNNNNNNNNNNNNNNNNNNAAAGATGAGTCTAGAAAATCCCACACCCACCAACATGTGACTCACGATAG	0	0	0	0	0	0	0	0	0	0	0	0	0	0	0	0	0	0	0	0	0	0	0	0	0	0	0	0	0	0	0	0	0	0	0	0	0	0	0	0	0	0	0	0	0	0
78	NODE_38736_length_320_cov_0.624561_g38017_i0	320	GCGTGAGAAGGGTGGTATCACATCGCAGAACGCGGCGTTGCTGTCCATGGNNNNNNNNNNNNNNNNNNNNNNNNNNNNNNNNNNNNNNNNNNNNNNNNNNNNNNNNNNNNNNNNNNNNNNNNNNNNNNNNNNNNNNNNNNNNNNNNNNNNNNNNNNNNNNNNNNNNNNNNNNNNNNNNNNNNNNNNNNNNNNNNNNNNNNNNNNNNNNNNNNNNNNNNNNNNNNNNNNNNNNNNNNNNNNNNNNNNNNNNNNNNNNNNNNNNNNNNNNNNGTCGACGATCTGCTTTTCCGTCACGGGCTGGTGGAGTCGTACAGTCTCCC	0	0	0	0	0	0	0	0	0	0	0	0	0	0	0	0	0	0	0	0	0	0	0	0	0	0	0	0	0	0	0	0	0	0	0	0	0	0.188563	0	0	0	0	0	0	0	0
79	NODE_38739_length_320_cov_0.621053_g38020_i0	320	GACAGGACCGGTTGGGACGGCGATCTGGAAGCAATTGCGTGCTTCACGATNNNNNNNNNNNNNNNNNNNNNNNNNNNNNNNNNNNNNNNNNNNNNNNNNNNNNNNNNNNNNNNNNNNNNNNNNNNNNNNNNNNNNNNNNNNNNNNNNNNNNNNNNNNNNNNNNNNNNNNNNNNNNNNNNNNNNNNNNNNNNNNNNNNNNNNNNNNNNNNNNNNNNNNNNNNNNNNNNNNNNNNNNNNNNNNNNNNNNNNNNNNNNNNNNNNNNNNNNNNNTCTCGTAGTATGCAAATGTCAAGACTCAAGTTAAAGATCCTGCTCTCGAT	0	0	0	0	0	0	0	0	0	0	0	0	0	0	0	0	0	0	0	0	0	0	0	0	0	0	0	0	0	0	0	0	0	0	0	0	0	0.189828	0	0	0	0	0	0	0	0
80	NODE_38747_length_320_cov_0.617544_g38028_i0	320	CCAACAGGACATTTAAGCCTATCTTCATAACCATACATACACTTATAGGANNNNNNNNNNNNNNNNNNNNNNNNNNNNNNNNNNNNNNNNNNNNNNNNNNNNNNNNNNNNNNNNNNNNNNNNNNNNNNNNNNNNNNNNNNNNNNNNNNNNNNNNNNNNNNNNNNNNNNNNNNNNNNNNNNNNNNNNNNNNNNNNNNNNNNNNNNNNNNNNNNNNNNNNNNNNNNNNNNNNNNNNNNNNNNNNNNNNNNNNNNNNNNNNNNNNNNNNNNNNCACATAAAATTTCAACTAATCATGACATAAGGAGAGGTCACTGAAAGGTT	0	0	0	0	0	0	0	0	0	0	0	0	0	0	0	0.336655	0	0	0	0	0	0	0	0	0	0	0	0	0	0	0	0	0	0	0	0	0	0	0	0	0	0	0	0	0	0
81	NODE_38750_length_320_cov_0.614035_g38031_i0	320	TGGGAAGCTTGAGCGCGACGACGAGAACGTCCGGCTGCTGGCGGCCGAGANNNNNNNNNNNNNNNNNNNNNNNNNNNNNNNNNNNNNNNNNNNNNNNNNNNNNNNNNNNNNNNNNNNNNNNNNNNNNNNNNNNNNNNNNNNNNNNNNNNNNNNNNNNNNNNNNNNNNNNNNNNNNNNNNNNNNNNNNNNNNNNNNNNNNNNNNNNNNNNNNNNNNNNNNNNNNNNNNNNNNNNNNNNNNNNNNNNNNNNNNNNNNNNNNNNNNNNNNNNNCTTGCACGCGAAGTGGCCATCCATCTCCGCCAGCCCGCGGATCGCGATAC	0	0	0	0	0	0	0	0	0	0	0	0	0	0	0	0	0	0	0	0	0	0	0	0	0	0	0	0	0	0	0	0	0	0	0	0	0	0.188247	0	0	0	0	0	0	0	0
82	NODE_38756_length_320_cov_0.610526_g38037_i0	320	CCCCATCTCTACAAAATACAGAAAGATTAGCTAGGCGTGGTGGTTCACGCNNNNNNNNNNNNNNNNNNNNNNNNNNNNNNNNNNNNNNNNNNNNNNNNNNNNNNNNNNNNNNNNNNNNNNNNNNNNNNNNNNNNNNNNNNNNNNNNNNNNNNNNNNNNNNNNNNNNNNNNNNNNNNNNNNNNNNNNNNNNNNNNNNNNNNNNNNNNNNNNNNNNNNNNNNNNNNNNNNNNNNNNNNNNNNNNNNNNNNNNNNNNNNNNNTGGTCCCAGCCACTCGGGAGGCCAAGGCGGGAGGACCGCTCCAGCCCGGGAGACAAAGGCT	0	0	0	0	0	0	0	0	0	0	0	0	0	0	0	0	0	0	0	0	0	0	0	0	0	0	0	0	0	0	0	0	0	0	0	0	0	0	0	0	0	0	0	0	0	0
83	NODE_38758_length_320_cov_0.607018_g38039_i0	320	GCCGCCCCGCGCCCTCCCCCAGAAGGAGGGATTATTGATCCGGCCTCAATNNNNNNNNNNNNNNNNNNNNNNNNNNNNNNNNNNNNNNNNNNNNNNNNNNNNNNNNNNNNNNNNNNNNNNNNNNNNNNNNNNNNNNNNNNNNNNNNNNNNNNNNNNNNNNNNNNNNNNNNNNNNNNNNNNNNNNNNNNNNNNNNNNNNNNNNNNNNNNNNNNNNNNNNNNNNNNNNNNNNNNNNNNNNNNNNNNNNNNNNNNNNNNNNNNNNNNNNNNNNGCTCGGGCTGGCGTTGCACGCTGCGAAGGTGCTTGGCTGTGGCTTTGGCC	0	0	0	0	0	0	0	0	0	0	0	0	0	0	0	0	0	0	0	0	0	0	0	0	0	0	0	0	0	0	0	0	0	0	0	0	0	0.187614	0	0	0	0	0	0	0	0
84	NODE_38759_length_320_cov_0.600000_g38040_i0	320	CTCCTTCTGATTGACACTTCGCTTGAGCTCTCTCTCGGCCCTGCAGGTCTNNNNNNNNNNNNNNNNNNNNNNNNNNNNNNNNNNNNNNNNNNNNNNNNNNNNNNNNNNNNNNNNNNNNNNNNNNNNNNNNNNNNNNNNNNNNNNNNNNNNNNNNNNNNNNNNNNNNNNNNNNNNNNNNNNNNNNNNNNNNNNNNNNNNNNNNNNNNNNNNNNNNNNNNNNNNNNNNNNNNNNNNNNNNNNNNNNNNNNNNNNNNNNNNNNNNNNNNNNNNGTCCGTAAGGCTTCCAGGCCAGTTCGTCGCTGACTGAGAGCACCCTTTCG	0	0	0	0	0	0	0	0	0	0	0	0	0	0	0	0	0	0	0	0	0	0	0	0	0	0	0	0	0	0	0	0	0	0	0	0	0	0	0	0	0	0	0	0	0	0
85	NODE_38763_length_320_cov_0.596491_g38044_i0	320	ACCGCCAGCACCACATCGGCGGTGCCGACCAACGCTTTGAGGTCGTCGATNNNNNNNNNNNNNNNNNNNNNNNNNNNNNNNNNNNNNNNNNNNNNNNNNNNNNNNNNNNNNNNNNNNNNNNNNNNNNNNNNNNNNNNNNNNNNNNNNNNNNNNNNNNNNNNNNNNNNNNNNNNNNNNNNNNNNNNNNNNNNNNNNNNNNNNNNNNNNNNNNNNNNNNNNNNNNNNNNNNNNNNNNNNNNNNNNNNNNNNNNNNNNNNNNNNNNNNNNNNNACGCCGGGATAATCGGCGATGGTCAGATCGATGGGGTCGGCCGCCCCCTT	0	0	0	0	0	0	0	0	0	0	0	0	0	0	0	0	0	0	0	0	0	0	0	0	0	0	0	0	0	0	0	0	0	0	0	0	0	0.186665	0	0	0	0	0	0	0	0
86	NODE_38766_length_320_cov_0.596491_g38047_i0	320	TCTCTAACCAGCTACGCCGTCTCTGGCATCTATCTTGGATGGTCACCTATNNNNNNNNNNNNNNNNNNNNNNNNNNNNNNNNNNNNNNNNNNNNNNNNNNNNNNNNNNNNNNNNNNNNNNNNNNNNNNNNNNNNNNNNNNNNNNNNNNNNNNNNNNNNNNNNNNNNNNNNNNNNNNNNNNNNNNNNNNNNNNNNNNNNNNNNNNNNNNNNNNNNNNNNNNNNNNNNNNNNNNNNNNNNNNNNNNNNNNNNNNNNNNNNNNNNNNNNNNNNATTCCTCAAGGAATGATGACTAAATTTACTATAGAGACAATAGCTGCTTA	0	0	0	0	0	0	0	0	0	0	0	0	0	0	0	0	0	0	0	0	0	0	0	0	0	0	0	0	0	0	0	0	0	0	0	0	0	0.189512	0	0	0	0	0	0	0	0
87	NODE_38768_length_320_cov_0.592982_g38049_i0	320	CATGGCATTGCCCTCCCAATTTCCTTCTCAGATAGTTCACTGCCAGTGCANNNNNNNNNNNNNNNNNNNNNNNNNNNNNNNNNNNNNNNNNNNNNNNNNNNNNNNNNNNNNNNNNNNNNNNNNNNNNNNNNNNNNNNNNNNNNNNNNNNNNNNNNNNNNNNNNNNNNNNNNNNNNNNNNNNNNNNNNNNNNNNNNNNNNNNNNNNNNNNNNNNNNNNNNNNNNNNNNNNNNNNNNNNNNNNNNNNNNNNNNNNNNNNNACCTCAATGAATTCATTATTACGTCCAACAGGTTTTTTGGTGGAACTTCCAGAATATATACT	0	0	0	0	0	0	0	0	0	0	0	0	0	0	0	0	0	0	0	0	0	0	0	0	0	0	0	0	0	0	0	0	0	0	0	0	0	0	0	0	0	0	0	0	0	0
88	NODE_38769_length_320_cov_0.592982_g38050_i0	320	GGCATTTGCTACGAGCCCATGCAGCGAAGCTTCACGATCGCCCTGCCTGCNNNNNNNNNNNNNNNNNNNNNNNNNNNNNNNNNNNNNNNNNNNNNNNNNNNNNNNNNNNNNNNNNNNNNNNNNNNNNNNNNNNNNNNNNNNNNNNNNNNNNNNNNNNNNNNNNNNNNNNNNNNNNNNNNNNNNNNNNNNNNNNNNNNNNNNNNNNNNNNNNNNNNNNNNNNNNNNNNNNNNNNNNNNNNNNNNNNNNNNNNNNNNNNNNNNNNNNNNNNNCTGCTGCCGGCGAAACCACGCAAACGAAGGCCGATGAAACAACGGTGGAG	0	0	0	0	0	0	0	0	0	0	0	0	0	0	0	0	0	0	0	0	0	0	0	0	0	0	0	0	0	0	0	0	0	0	0	0	0	0.185399	0	0	0	0	0	0	0	0
89	NODE_38776_length_320_cov_0.589474_g38057_i0	320	TAAGAACAAATTTTCGTAATAACTATTCTAAGGGCAATTCTTAGAATTTANNNNNNNNNNNNNNNNNNNNNNNNNNNNNNNNNNNNNNNNNNNNNNNNNNNNNNNNNNNNNNNNNNNNNNNNNNNNNNNNNNNNNNNNNNNNNNNNNNNNNNNNNNNNNNNNNNNNNNNNNNNNNNNNNNNNNNNNNNNNNNNNNNNNNNNNNNNNNNNNNNNNNNNNNNNNNNNNNNNNNNNNNNNNNNNNNNNNNNNNNNNNNNNNNNNNNNNNNNNNCAACAGGTTTAATCATTTGAAACCGAACGTTACCTTTGGGAAGCTTTCCA	0	0	0	0	0	0	0	0	0	0	0	0	0	0	0	0	0	0	0	0	0	0	0	0	0	0	0	0	0	0	0	0	0	0	0	0	0	0.185399	0	0	0	0	0	0	0	0
90	NODE_38784_length_320_cov_0.578947_g38065_i0	320	GCTATTAAAAGCACATTTTCAGGTGGATTCAAAACTGCTAAAAAATATATNNNNNNNNNNNNNNNNNNNNNNNNNNNNNNNNNNNNNNNNNNNNNNNNNNNNNNNNNNNNNNNNNNNNNNNNNNNNNNNNNNNNNNNNNNNNNNNNNNNNNNNNNNNNNNNNNNNNNNNNNNNNNNNNNNNNNNNNNNNNNNNNNNNNNNNNNNNNNNNNNNNNNNNNNNNNNNNNNNNNNNNNNNNNNNNNNNNNNNNNNNNNNNNNNNNNNNNNNNNNAAACCTTAGCGCGTTTCCTCGGTTCAAAAGCGTGATTCGTAGCCTCGAGA	0	0	0	0	0	0	0	0	0	0	0	0	0	0	0	0	0	0	0	0	0	0	0	0	0	0	0	0	0	0	0	0	0	0	0	0	0	0.189512	0	0	0	0	0	0	0	0
91	NODE_38785_length_320_cov_0.578947_g38066_i0	320	GGACCTCGAAGATGTGGTCCTCTGGTGTCGAGAGCACCGGCGGCGCGGCCNNNNNNNNNNNNNNNNNNNNNNNNNNNNNNNNNNNNNNNNNNNNNNNNNNNNNNNNNNNNNNNNNNNNNNNNNNNNNNNNNNNNNNNNNNNNNNNNNNNNNNNNNNNNNNNNNNNNNNNNNNNNNNNNNNNNNNNNNNNNNNNNNNNNNNNNNNNNNNNNNNNNNNNNNNNNNNNNNNNNNNNNNNNNNNNNNNNNNNNNNNNNNNNNNNNNNNNNNNNNTGCTTGAATGTGAAGCTTGGAGATGCGACGGACGAGAAAAAGTTTTGGCG	0	0	0	0	0	0	0	0	0	0	0	0	0	0	0	0	0	0	0	0	0	0	0	0	0	0	0	0	0	0	0	0	0	0	0	0	0	0.189512	0	0	0	0	0	0	0	0
92	NODE_38789_length_320_cov_0.578947_g38070_i0	320	TTTCAGGCATCGCCGAACGAAGCCAAGCCTCCCTCCGATGGCATTCAGTGCCCAGGNNNNNNNNNNNNNNNNNNNNNNNNNNNNNNNNNNNNNNNNNNNNNNNNNNNNNNNNNNNNNNNNNNNNNNNNNNNNNNNNNNNNNNNNNNNNNNNNNNNNNNNNNNNNNNNNNNNNNNNNNNNNNNNNNNNNNNNNNNNNNNNNNNNNNNNNNNNNNNNNNNNNNNNNNNNNNNNNNNNNNNNNNNNNNNNNNNNNNNNNNNNNNNNNNNNNNNGCTTTCAAGGCAACCCCTTGGGGGCAATCTCTTGCCCCCTCGCACGCAGG	0	0	0	0	0	0	0	0	0	0	0	0	0	0	0	0	0	0	0	0	0	0	0	0	0	0	0	0	0	0	0	0	0	0	0	0	0	0.157874	0	0	0	0	0	0	0	0
93	NODE_38796_length_320_cov_0.578947_g38077_i0	320	ATTTTCCAGCCAAAATCACTTCTTCTTACCCTTCTCCTTCTCTTTACCCTNNNNNNNNNNNNNNNNNNNNNNNNNNNNNNNNNNNNNNNNNNNNNNNNNNNNNNNNNNNNNNNNNNNNNNNNNNNNNNNNNNNNNNNNNNNNNNNNNNNNNNNNNNNNNNNNNNNNNNNNNNNNNNNNNNNNNNNNNNNNNNNNNNNNNNNNNNNNNNNNNNNNNNNNNNNNNNNNNNNNNNNNNNNNNNNNNNNNNNNNNNNNNNNNNNNNNNNNNNNNCATCCCTCGCCACAGCATTAATCACCGCAAACCGCCTCGGCCATAGCTTG	0	0	0	0	0	0	0	0	0	0	0	0	0	0	0	0	0	0	0	0	0	0	0	0	0	0	0	0	0	0	0	0	0	0	0	0	0	0.189196	0	0	0	0	0	0	0	0
94	NODE_38799_length_320_cov_0.578947_g38080_i0	320	AAAGATTATTAAAAGGTTTTATTTTAGATAATGAGGTTATAGCATATGGTNNNNNNNNNNNNNNNNNNNNNNNNNNNNNNNNNNNNNNNNNNNNNNNNNNNNNNNNNNNNNNNNNNNNNNNNNNNNNNNNNNNNNNNNNNNNNNNNNNNNNNNNNNNNNNNNNNNNNNNNNNNNNNNNNNNNNNNNNNNNNNNNNNNNNNNNNNNNNNNNNNNNNNNNNNNNNNNNNNNNNNNNNNNNNNNNNNNNNNNNNNNNNNNNNNNNNNNNNNNNGATGAGTCATGCACTATCCATAGAAGTCATCCTAAACATGGTAATGAAGG	0	0	0	0	0	0	0	0	0	0	0	0	0	0	0	0	0	0	0	0	0	0	0	0	0	0	0	0	0	0	0	0	0	0	0	0	0	0.189196	0	0	0	0	0	0	0	0
95	NODE_38810_length_320_cov_0.578947_g38091_i0	320	GTCGGCCACCGCGTAGTAACCGCGGATCTGCTGGCTCTGCTCGAAGGCCGNNNNNNNNNNNNNNNNNNNNNNNNNNNNNNNNNNNNNNNNNNNNNNNNNNNNNNNNNNNNNNNNNNNNNNNNNNNNNNNNNNNNNNNNNNNNNNNNNNNNNNNNNNNNNNNNNNNNNNNNNNNNNNNNNNNNNNNNNNNNNNNNNNNNNNNNNNNNNNNNNNNNNNNNNNNNNNNNNNNNNNNNNNNNNNNNNNNNNNNNNNNNNNNNNNNNNNNNNNNNATGATGTTGGGGTCGACCAGGCGCACGCCGGGCGTGCCGACCGCGGCCTG	0	0	0	0	0	0	0	0	0	0	0	0	0	0	0	0	0	0	0	0	0	0	0	0	0	0	0	0	0	0	0	0	0	0	0	0	0	0.189196	0	0	0	0	0	0	0	0
96	NODE_38819_length_320_cov_0.571930_g38100_i0	320	CCGGCATTGCCAACCAAAGCCCGGTATAGTCCGAGATGGTCCTTTGCGTGNNNNNNNNNNNNNNNNNNNNNNNNNNNNNNNNNNNNNNNNNNNNNNNNNNNNNNNNNNNNNNNNNNNNNNNNNNNNNNNNNNNNNNNNNNNNNNNNNNNNNNNNNNNNNNNNNNNNNNNNNNNNNNNNNNNNNNNNNNNNNNNNNNNNNNNNNNNNNNNNNNNNNNNNNNNNNNNNNNNNNNNNNNNNNNNNNNNNNNNNNNNNNNNNNNNNNNNNNNNNCATCGCCAAGGTGAACGCCAGCGGATGAGCTTCACCCGCACTGTTGGCCC	0	0	0	0	0	0	0	0	0	0	0	0	0	0	0	0	0	0	0	0	0	0	0	0	0	0	0	0	0	0	0	0	0	0	0	0	0	0.188563	0	0	0	0	0	0	0	0
97	NODE_38834_length_320_cov_0.547368_g38115_i0	320	GATGAAAGTATGAACACAATGTCAACTTTCAAATATCTTCTTTCGTCTTTNNNNNNNNNNNNNNNNNNNNNNNNNNNNNNNNNNNNNNNNNNNNNNNNNNNNNNNNNNNNNNNNNNNNNNNNNNNNNNNNNNNNNNNNNNNNNNNNNNNNNNNNNNNNNNNNNNNNNNNNNNNNNNNNNNNNNNNNNNNNNNNNNNNNNNNNNNNNNNNNNNNNNNNNNNNNNNNNNNNNNNNNNNNNNNNNNNNNNNNNNNNNNNNNNNNNNNNNNNNNGGACAAGTAGATTTTTTAATAAAGAAATAGACTGCCTCTTAATCCATTTT	0	0	0	0	0	0	0	0	0	0	0	0	0	0	0	0.280546	0	0	0	0	0	0	0	0	0	0	0	0	0	0	0	0	0	0	0	0	0	0	0	0	0	0	0	0	0	0
98	NODE_38837_length_320_cov_0.543860_g38118_i0	320	GTCCATTCCGGTTGCCGGAAGGATGAACCGCTGGCGGGTGAGTTTCAGGANNNNNNNNNNNNNNNNNNNNNNNNNNNNNNNNNNNNNNNNNNNNNNNNNNNNNNNNNNNNNNNNNNNNNNNNNNNNNNNNNNNNNNNNNNNNNNNNNNNNNNNNNNNNNNNNNNNNNNNNNNNNNNNNNNNNNNNNNNNNNNNNNNNNNNNNNNNNNNNNNNNNNNNNNNNNNNNNNNNNNNNNNNNNNNNNNNNNNNNNNNNNNNNNNNNNNNNNNNNNGTGCTCGCGGACGAGCTGTCCCGGTCGGCCGCTGCGCCTGAGCGTGGAAT	0	0	0	0	0	0	0	0	0	0	0	0	0	0	0	0	0	0	0	0	0	0	0	0	0	0	0	0	0	0	0	0	0	0	0	0	0	0.185083	0	0	0	0	0	0	0	0
99	NODE_38838_length_320_cov_0.536842_g38119_i0	320	TTACGGCCACCTATTTCTCACTATGGCTAATGGAGCTCGCTACGGCGGTCNNNNNNNNNNNNNNNNNNNNNNNNNNNNNNNNNNNNNNNNNNNNNNNNNNNNNNNNNNNNNNNNNNNNNNNNNNNNNNNNNNNNNNNNNNNNNNNNNNNNNNNNNNNNNNNNNNNNNNNNNNNNNNNNNNNNNNNNNNNNNNNNNNNNNNNNNNNNNNNNNNNNNNNNNNNNNNNNNNNNNNNNNNNNNNNNNNNNNNNNNNNNNNNNNNNNNNNNNNNNNNATCTCATTCTACCCCCATTTCACAACATAAATCCTGAGCATAGGACAT	0	0	0	0	0	0	0	0	0	0	0	0	0	0	0	0.334971	0	0	0	0	0	0	0	0	0	0	0	0	0	0	0	0	0	0	0	0	0	0	0	0	0	0	0	0	0	0
100	NODE_38844_length_320_cov_0.533333_g38125_i0	320	TCTACATTTTTTGAACTTTTTGGTAGATTATGAGTTATGAAGTAACACTANNNNNNNNNNNNNNNNNNNNNNNNNNNNNNNNNNNNNNNNNNNNNNNNNNNNNNNNNNNNNNNNNNNNNNNNNNNNNNNNNNNNNNNNNNNNNNNNNNNNNNNNNNNNNNNNNNNNNNNNNNNNNNNNNNNNNNNNNNNNNNNNNNNNNNNNNNNNNNNNNNNNNNNNNNNNNNNNNNNNNNNNNNNNNNNNNNNNNNNNNNNNNNNNNNNNNNNNNNNNAGTGATACTTAAACATTTTTTGAACACCTTTTAGGTTGTTACAAACTAAG	0	0	0	0	0	0	0	0	0	0	0	0	0	0	0	0.280546	0	0	0	0	0	0	0	0	0	0	0	0	0	0	0	0	0	0	0	0	0	0	0	0	0	0	0	0	0	0
101	NODE_38851_length_320_cov_0.526316_g38132_i0	320	ATTTGAACCTGCCCAAGTGCTTCACTAGCTCTCATACATGTACCCTTTTTNNNNNNNNNNNNNNNNNNNNNNNNNNNNNNNNNNNNNNNNNNNNNNNNNNNNNNNNNNNNNNNNNNNNNNNNNNNNNNNNNNNNNNNNNNNNNNNNNNNNNNNNNNNNNNNNNNNNNNNNNNNNNNNNNNNNNNNNNNNNNNNNNNNNNNNNNNNNNNNNNNNNNNNNNNNNNNNNNNNNNNNNNNNNNNNNNNNNNNNNNNNNNNNNNNNNNNNNNNNNTATCTTCTCTTGATATGCACATAAGCTCCCGTTTGAGATGTTTAAATGCT	0	0	0	0	0	0	0	0	0	0	0	0	0	0	0	0.280546	0	0	0	0	0	0	0	0	0	0	0	0	0	0	0	0	0	0	0	0	0	0	0	0	0	0	0	0	0	0
102	NODE_38854_length_320_cov_0.526316_g38135_i0	320	GGGCGATTGAACCTATCTATCGATCTCTGGTACCGGGCATGCTCAGGATGNNNNNNNNNNNNNNNNNNNNNNNNNNNNNNNNNNNNNNNNNNNNNNNNNNNNNNNNNNNNNNNNNNNNNNNNNNNNNNNNNNNNNNNNNNNNNNNNNNNNNNNNNNNNNNNNNNNNNNNNNNNNNNNNNNNNNNNNNNNNNNNNNNNNNNNNNNNNNNNNNNNNNNNNNNNNNNNNNNNNNNNNNNNNNNNNNNNNNNNNNNNNNNNNNNNNNNNNNNNNTGTTTGTGCCGGAACCGTTGCTAAGCTTTCCTGCTCGCAGCAGACTAATC	0	0	0	0	0	0	0	0	0	0	0	0	0	0	0	0	0	0	0	0	0	0	0	0	0	0	0	0	0	0	0	0	0	0	0	0	0	0.15819	0	0	0	0	0	0	0	0
103	NODE_38855_length_320_cov_0.526316_g38136_i0	320	TATTCCTACGAATTCTAAGACATTCCTATGATTGTTTTAAATCATGCACTNNNNNNNNNNNNNNNNNNNNNNNNNNNNNNNNNNNNNNNNNNNNNNNNNNNNNNNNNNNNNNNNNNNNNNNNNNNNNNNNNNNNNNNNNNNNNNNNNNNNNNNNNNNNNNNNNNNNNNNNNNNNNNNNNNNNNNNNNNNNNNNNNNNNNNNNNNNNNNNNNNNNNNNNNNNNNNNNNNNNNNNNNNNNNNNNNNNNNNNNNNNNNNNNNNNNNNNNNNNNAGTGATTTATTTATAAGAGCCTTAATGTTTTGGTCTTCAAGCTTTAGTGT	0	0	0	0	0	0	0	0	0	0	0	0	0	0	0	0.280546	0	0	0	0	0	0	0	0	0	0	0	0	0	0	0	0	0	0	0	0	0	0	0	0	0	0	0	0	0	0
104	NODE_38857_length_320_cov_0.526316_g38138_i0	320	GCACCCACGAGATCGTCGCGGCGTAGCCCATCTCGCCGTAGGAAAAGGCGNNNNNNNNNNNNNNNNNNNNNNNNNNNNNNNNNNNNNNNNNNNNNNNNNNNNNNNNNNNNNNNNNNNNNNNNNNNNNNNNNNNNNNNNNNNNNNNNNNNNNNNNNNNNNNNNNNNNNNNNNNNNNNNNNNNNNNNNNNNNNNNNNNNNNNNNNNNNNNNNNNNNNNNNNNNNNNNNNNNNNNNNNNNNNNNNNNNNNNNNNNNNNNNNNNNNNNNNNNNNTCACCGTTGTCGATCCCGCGGGGCCGCCCTCGGTCATGATCCAGACCTGG	0	0	0	0	0	0	0	0	0	0	0	0	0	0	0	0	0	0	0	0	0	0	0	0	0	0	0	0	0	0	0	0	0	0	0	0	0	0.15819	0	0	0	0	0	0	0	0
105	NODE_38858_length_320_cov_0.526316_g38139_i0	320	ATCTGTTCCAAACTCACAAAGATTTAGGCTATGATTGAAACTTATAATGANNNNNNNNNNNNNNNNNNNNNNNNNNNNNNNNNNNNNNNNNNNNNNNNNNNNNNNNNNNNNNNNNNNNNNNNNNNNNNNNNNNNNNNNNNNNNNNNNNNNNNNNNNNNNNNNNNNNNNNNNNNNNNNNNNNNNNNNNNNNNNNNNNNNNNNNNNNNNNNNNNNNNNNNNNNNNNNNNNNNNNNNNNNNNNNNNNNNNNNNNNNNNNNNNNNNNNNNNNNNTTAGTTAATACTCAATTAGAAGAAGAAAGTGAATCATTACAAGGATAAAT	0	0	0	0	0	0	0	0	0	0	0	0	0	0	0	0.280546	0	0	0	0	0	0	0	0	0	0	0	0	0	0	0	0	0	0	0	0	0	0	0	0	0	0	0	0	0	0
106	NODE_38874_length_320_cov_0.526316_g38155_i0	320	GTATCTAAGGGGAGAGTTTGCTTAAGGAATTTGCTCAACTAACAGATACANNNNNNNNNNNNNNNNNNNNNNNNNNNNNNNNNNNNNNNNNNNNNNNNNNNNNNNNNNNNNNNNNNNNNNNNNNNNNNNNNNNNNNNNNNNNNNNNNNNNNNNNNNNNNNNNNNNNNNNNNNNNNNNNNNNNNNNNNNNNNNNNNNNNNNNNNNNNNNNNNNNNNNNNNNNNNNNNNNNNNNNNNNNNNNNNNNNNNNNNNNNNNNNNNNNNNNNNNNNNGTACTGAGCACTAAATGGACCTCCTGCACCTCCAGTTTCAGACAAGCACT	0	0	0	0	0	0	0	0	0	0	0	0	0	0	0	0	0	0	0	0	0	0	0	0	0	0	0	0	0	0	0	0	0	0	0	0	0	0.157558	0	0	0	0	0	0	0	0
107	NODE_38875_length_320_cov_0.526316_g38156_i0	320	GAGATGGAGCTGAGAGTCCAGGGGGACCAAAGCAGCTGGAGTTCACAGGANNNNNNNNNNNNNNNNNNNNNNNNNNNNNNNNNNNNNNNNNNNNNNNNNNNNNNNNNNNNNNNNNNNNNNNNNNNNNNNNNNNNNNNNNNNNNNNNNNNNNNNNNNNNNNNNNNNNNNNNNNNNNNNNNNNNNNNNNNNNNNNNNNNNNNNNNNNNNNNNNNNNNNNNNNNNNNNNNNNNNNNNNNNNNNNNNNNNNNNNNNNNNNNNNNNNNNNNNNNNCATCGTCAGCAGATCTCAGTGCAGCAGTCAGCAGTAGCAGGGCCTGGGTG	0	0	0	0	0	0	0	0	0	0	0	0	0	0	0	0	0	0	0	0	0	0	0	0	0	0	0	0	0	0	0	0	0	0	0	0	0	0.15819	0	0	0	0	0	0	0	0
108	NODE_38880_length_320_cov_0.526316_g38161_i0	320	GTTCCTTTGTGGTGGTTTCCGCCTTGAAGAAGAAGAAGGACCTCCCCAGTNNNNNNNNNNNNNNNNNNNNNNNNNNNNNNNNNNNNNNNNNNNNNNNNNNNNNNNNNNNNNNNNNNNNNNNNNNNNNNNNNNNNNNNNNNNNNNNNNNNNNNNNNNNNNNNNNNNNNNNNNNNNNNNNNNNNNNNNNNNNNNNNNNNNNNNNNNNNNNNNNNNNNNNNNNNNNNNNNNNNNNNNNNNNNNNNNNNNNNNNNNNNNNNNNNNNNNNNNNNNTGATGAGCAATTGGAGATGGTAGATGGTAGATAATATTCAAGAAACCAAT	0	0	0	0	0	0	0	0	0	0	0	0	0	0	0	0	0	0	0	0	0	0	0	0	0	0	0	0	0	0	0	0	0	0	0	0	0	0.15819	0	0	0	0	0	0	0	0
109	NODE_38882_length_320_cov_0.526316_g38163_i0	320	AACAGGCATCTCAAGTATCATCCTTCTACGTGTGAGACAGGGCTGGGTTGNNNNNNNNNNNNNNNNNNNNNNNNNNNNNNNNNNNNNNNNNNNNNNNNNNNNNNNNNNNNNNNNNNNNNNNNNNNNNNNNNNNNNNNNNNNNNNNNNNNNNNNNNNNNNNNNNNNNNNNNNNNNNNNNNNNNNNNNNNNNNNNNNNNNNNNNNNNNNNNNNNNNNNNNNNNNNNNNNNNNNNNNNNNNNNNNNNNNNNNNNNNNNNNNNNNNNNNNNNNNTGGGTTGGTTGATGGAATGAGAGCATATGTGATACATTGGCACAGGGTGG	0	0	0	0	0	0	0	0	0	0	0	0	0	0	0	0	0	0	0	0	0	0	0	0	0	0	0	0	0	0	0	0	0	0	0	0	0	0.15819	0	0	0	0	0	0	0	0
110	NODE_38886_length_320_cov_0.526316_g38167_i0	320	TTTTCTTCCTCTTTGCCTGCCTCTTCTTCCTTTTCTCTTACCTTGGCTACNNNNNNNNNNNNNNNNNNNNNNNNNNNNNNNNNNNNNNNNNNNNNNNNNNNNNNNNNNNNNNNNNNNNNNNNNNNNNNNNNNNNNNNNNNNNNNNNNNNNNNNNNNNNNNNNNNNNNNNNNNNNNNNNNNNNNNNNNNNNNNNNNNNNNNNNNNNNNNNNNNNNNNNNNNNNNNNNNNNNNNNNNNNNNNNNNNNNNNNNNNNNNNNNNNNNNNNNNNNNTGGCTACACTGGCAACTGTAATTCCTTCCTGAAGGTTCATAAGCTTCACT	0	0	0	0	0	0	0	0	0	0	0	0	0	0	0	0	0	0	0	0	0	0	0	0	0	0	0	0	0	0	0	0	0	0	0	0	0	0.15819	0	0	0	0	0	0	0	0
111	NODE_38891_length_320_cov_0.526316_g38172_i0	320	GGACCTTCTTGCGCAATACATTCGCGACTTCCGCATAAACCAACATTGGTNNNNNNNNNNNNNNNNNNNNNNNNNNNNNNNNNNNNNNNNNNNNNNNNNNNNNNNNNNNNNNNNNNNNNNNNNNNNNNNNNNNNNNNNNNNNNNNNNNNNNNNNNNNNNNNNNNNNNNNNNNNNNNNNNNNNNNNNNNNNNNNNNNNNNNNNNNNNNNNNNNNNNNNNNNNNNNNNNNNNNNNNNNNNNNNNNNNNNNNNNNNNNNNNNNNNNNNNNNNNGCACCGAAAGAGCCTCGTGACTGCCGGCTTCCGCCGTCAAGGCCTTCACG	0	0	0	0	0	0	0	0	0	0	0	0	0	0	0	0	0	0	0	0	0	0	0	0	0	0	0	0	0	0	0	0	0	0	0	0	0	0	0	0	0	0	0	0	0	0
112	NODE_38898_length_320_cov_0.526316_g38179_i0	320	CACAGAAGCACTTAGACTGGTTACTCTATCACACAGTGTACACGTTCTTANNNNNNNNNNNNNNNNNNNNNNNNNNNNNNNNNNNNNNNNNNNNNNNNNNNNNNNNNNNNNNNNNNNNNNNNNNNNNNNNNNNNNNNNNNNNNNNNNNNNNNNNNNNNNNNNNNNNNNNNNNNNNNNNNNNNNNNNNNNNNNNNNNNNNNNNNNNNNNNNNNNNNNNNNNNNNNNNNNNNNNNNNNNNNNNNNNNNNNNNNNNNNNNNNNNNNNNNNNNNGGTGACAATTGCAATGCATAATTCCCAAGGCAAAAAGTGCTTAATTCAAG	0	0	0	0	0	0	0	0	0	0	0	0	0	0	0	0	0	0	0	0	0	0	0	0	0	0	0	0	0	0	0	0	0	0	0	0	0	0.15819	0	0	0	0	0	0	0	0
113	NODE_38905_length_320_cov_0.526316_g38186_i0	320	GGTATTCTCTATTTGTTTACCTATTCAGCAGATTGTAATTCCATTTTCCANNNNNNNNNNNNNNNNNNNNNNNNNNNNNNNNNNNNNNNNNNNNNNNNNNNNNNNNNNNNNNNNNNNNNNNNNNNNNNNNNNNNNNNNNNNNNNNNNNNNNNNNNNNNNNNNNNNNNNNNNNNNNNNNNNNNNNNNNNNNNNNNNNNNNNNNNNNNNNNNNNNNNNNNNNNNNNNNNNNNNNNNNNNNNNNNNNNNNNNNNNNNNNNNNNNNNNNNNNNNCTGTACTAATGGAGTACTGAATAAAACCATTGAGGTATTTCAGTCACGTG	0	0	0	0	0	0	0	0	0	0	0	0	0	0	0	0.280546	0	0	0	0	0	0	0	0	0	0	0	0	0	0	0	0	0	0	0	0	0	0	0	0	0	0	0	0	0	0
114	NODE_38907_length_320_cov_0.526316_g38188_i0	320	TAGAGATTGGTTTCAGAATCATCTTTTGTGTTTCCTGATTTTATGGTGTANNNNNNNNNNNNNNNNNNNNNNNNNNNNNNNNNNNNNNNNNNNNNNNNNNNNNNNNNNNNNNNNNNNNNNNNNNNNNNNNNNNNNNNNNNNNNNNNNNNNNNNNNNNNNNNNNNNNNNNNNNNNNNNNNNNNNNNNNNNNNNNNNNNNNNNNNNNNNNNNNNNNNNNNNNNNNNNNNNNNNNNNNNNNNNNNNNNNNNNNNNNNNNNNNNNNNNNNNNNNTTTAGGCTCCTTAGCTTTTCAGCAGAGAGATTTTCCTCTATAACATACTA	0	0	0	0	0	0	0	0	0	0	0	0	0	0	0	0.280546	0	0	0	0	0	0	0	0	0	0	0	0	0	0	0	0	0	0	0	0	0	0	0	0	0	0	0	0	0	0
115	NODE_38909_length_320_cov_0.526316_g38190_i0	320	ATCTGATTTGGTAATCATGCACAACATTTATATCATAAAAGAAAATACAANNNNNNNNNNNNNNNNNNNNNNNNNNNNNNNNNNNNNNNNNNNNNNNNNNNNNNNNNNNNNNNNNNNNNNNNNNNNNNNNNNNNNNNNNNNNNNNNNNNNNNNNNNNNNNNNNNNNNNNNNNNNNNNNNNNNNNNNNNNNNNNNNNNNNNNNNNNNNNNNNNNNNNNNNNNNNNNNNNNNNNNNNNNNNNNNNNNNNNNNNNNNNNNNNNNNNNNNNNNNTTGATATAGAAATATGGTCATTAACTCTAGGTTTTAAGACATAAGAAAGA	0	0	0	0	0	0	0	0	0	0	0	0	0	0	0	0.280546	0	0	0	0	0	0	0	0	0	0	0	0	0	0	0	0	0	0	0	0	0	0	0	0	0	0	0	0	0	0
116	NODE_38912_length_320_cov_0.526316_g38193_i0	320	ATCCTTTATACCCTAACGACGCCCTCCTTCAACGATGCCTTCTCGTTTGGNNNNNNNNNNNNNNNNNNNNNNNNNNNNNNNNNNNNNNNNNNNNNNNNNNNNNNNNNNNNNNNNNNNNNNNNNNNNNNNNNNNNNNNNNNNNNNNNNNNNNNNNNNNNNNNNNNNNNNNNNNNNNNNNNNNNNNNNNNNNNNNNNNNNNNNNNNNNNNNNNNNNNNNNNNNNNNNNNNNNNNNNNNNNNNNNNNNNNNNNNNNNNNNNNNNNNNNNNNNNGGGCCCCGGCGACGCCAAGGACGCCGCCGTCGTTACTCCCACTCCCACGC	0	0	0	0	0	0	0	0	0	0	0	0	0	0	0	0.280546	0	0	0	0	0	0	0	0	0	0	0	0	0	0	0	0	0	0	0	0	0	0	0	0	0	0	0	0	0	0
117	NODE_38914_length_320_cov_0.526316_g38195_i0	320	GAAGGACCAATCCTTGACCAAATACAAGTGGATACAACAGATGCTATAGCNNNNNNNNNNNNNNNNNNNNNNNNNNNNNNNNNNNNNNNNNNNNNNNNNNNNNNNNNNNNNNNNNNNNNNNNNNNNNNNNNNNNNNNNNNNNNNNNNNNNNNNNNNNNNNNNNNNNNNNNNNNNNNNNNNNNNNNNNNNNNNNNNNNNNNNNNNNNNNNNNNNNNNNNNNNNNNNNNNNNNNNNNNNNNNNNNNNNNNNNNNNNNNNNNNNNNNNNNNNNGAAGCCTGAGTTCTTAGAGAGGATAGCGAAGAACAGTAAGATCTACTACG	0	0	0	0	0	0	0	0	0	0	0	0	0	0	0	0	0	0	0	0	0	0	0	0	0	0	0	0	0	0	0	0	0	0	0	0	0	0.15819	0	0	0	0	0	0	0	0
118	NODE_38915_length_320_cov_0.526316_g38196_i0	320	TTGTAAGCCAAAAGCACACGCGGCCGCTACTCAATTCCACGATCAGCCAGNNNNNNNNNNNNNNNNNNNNNNNNNNNNNNNNNNNNNNNNNNNNNNNNNNNNNNNNNNNNNNNNNNNNNNNNNNNNNNNNNNNNNNNNNNNNNNNNNNNNNNNNNNNNNNNNNNNNNNNNNNNNNNNNNNNNNNNNNNNNNNNNNNNNNNNNNNNNNNNNNNNNNNNNNNNNNNNNNNNNNNNNNNNNNNNNNNNNNNNNNNNNNNNNNNNNNNNNNNNNCACTCTGGGTGAAGGTCAGATTCCGCGCACCATCGGCGGTTCGCCGCAAC	0	0	0	0	0	0	0	0	0	0	0	0	0	0	0	0	0	0	0	0	0	0	0	0	0	0	0	0	0	0	0	0	0	0	0	0	0	0.157874	0	0	0	0	0	0	0	0
119	NODE_38916_length_320_cov_0.526316_g38197_i0	320	CCCAAACCAAAATATAGAAGGGATTCTTCCTACCTGCCCCTAAAAGTCTTNNNNNNNNNNNNNNNNNNNNNNNNNNNNNNNNNNNNNNNNNNNNNNNNNNNNNNNNNNNNNNNNNNNNNNNNNNNNNNNNNNNNNNNNNNNNNNNNNNNNNNNNNNNNNNNNNNNNNNNNNNNNNNNNNNNNNNNNNNNNNNNNNNNNNNNNNNNNNNNNNNNNNNNNNNNNNNNNNNNNNNNNNNNNNNNNNNNNNNNNNNNNNNNNNNNNNNNNNNNNCAAGAATTTTCTTTGCCGTTTTATGACTGAAATGTCCTGCTCCATCCTGG	0	0	0	0	0	0	0	0	0	0	0	0	0	0	0	0	0	0	0	0	0	0	0	0	0	0	0	0	0	0	0	0	0	0	0	0	0	0.157874	0	0	0	0	0	0	0	0
120	NODE_38923_length_320_cov_0.526316_g38204_i0	320	CTGCTGACCATGCTGGGCGCCAGCGGCTTCACCCTCTTCAACACCATTTTNNNNNNNNNNNNNNNNNNNNNNNNNNNNNNNNNNNNNNNNNNNNNNNNNNNNNNNNNNNNNNNNNNNNNNNNNNNNNNNNNNNNNNNNNNNNNNNNNNNNNNNNNNNNNNNNNNNNNNNNNNNNNNNNNNNNNNNNNNNNNNNNNNNNNNNNNNNNNNNNNNNNNNNNNNNNNNNNNNNNNNNNNNNNNNNNNNNNNNNNNNNNNNNNNNNNNNNNNNNNTCGATCGAGCAGGCGGCGATTCCGATCCTGATCATCGTCGCCAACTTCGT	0	0	0	0	0	0	0	0	0	0	0	0	0	0	0	0.279984	0	0	0	0	0	0	0	0	0	0	0	0	0	0	0	0	0	0	0	0	0	0	0	0	0	0	0	0	0	0
121	NODE_38933_length_320_cov_0.526316_g38214_i0	320	TGGTAGGTGCCCTTGAGAGAATGTCAACCCTTTACTAGAAGGAAGACCTCNNNNNNNNNNNNNNNNNNNNNNNNNNNNNNNNNNNNNNNNNNNNNNNNNNNNNNNNNNNNNNNNNNNNNNNNNNNNNNNNNNNNNNNNNNNNNNNNNNNNNNNNNNNNNNNNNNNNNNNNNNNNNNNNNNNNNNNNNNNNNNNNNNNNNNNNNNNNNNNNNNNNNNNNNNNNNNNNNNNNNNNNNNNNNNNNNNNNNNNNNNNNNNNNNNNNNNNNNNNNTCTGGGATTCAAAGACTGCTACTAAAGGTCACACCCTCTACTGGCAGGTG	0	0	0	0	0	0	0	0	0	0	0	0	0	0	0	0.280546	0	0	0	0	0	0	0	0	0	0	0	0	0	0	0	0	0	0	0	0	0	0	0	0	0	0	0	0	0	0
122	NODE_38935_length_320_cov_0.526316_g38216_i0	320	TGGATGAAGACCCCTCATACCTTGTGCCAACTCCAGCAGCCCTTCCCGATNNNNNNNNNNNNNNNNNNNNNNNNNNNNNNNNNNNNNNNNNNNNNNNNNNNNNNNNNNNNNNNNNNNNNNNNNNNNNNNNNNNNNNNNNNNNNNNNNNNNNNNNNNNNNNNNNNNNNNNNNNNNNNNNNNNNNNNNNNNNNNNNNNNNNNNNNNNNNNNNNNNNNNNNNNNNNNNNNNNNNNNNNNNNNNNNNNNNNNNNNNNNNNNNNNNNNNNNNNNNCGATGTTCCCAGTGGTTCCTGCAGCAGTCCCCCTCCCACATCTCGGCTCC	0	0	0	0	0	0	0	0	0	0	0	0	0	0	0	0	0	0	0	0	0	0	0	0	0	0	0	0	0	0	0	0	0	0	0	0	0	0.157874	0	0	0	0	0	0	0	0
123	NODE_38938_length_320_cov_0.526316_g38219_i0	320	GGCGGCGGTCGTGCCGTTCGTTGCAGTCACACGGTTGCATACTTTCCCTCNNNNNNNNNNNNNNNNNNNNNNNNNNNNNNNNNNNNNNNNNNNNNNNNNNNNNNNNNNNNNNNNNNNNNNNNNNNNNNNNNNNNNNNNNNNNNNNNNNNNNNNNNNNNNNNNNNNNNNNNNNNNNNNNNNNNNNNNNNNNNNNNNNNNNNNNNNNNNNNNNNNNNNNNNNNNNNNNNNNNNNNNNNNNNNNNNNNNNNNNNNNNNNNNNNNNNNNNNNNNTTCCCTCCGTCAAATCCTGAATCACGGCTTCTCGATTCGCGATTCTGAGC	0	0	0	0	0	0	0	0	0	0	0	0	0	0	0	0	0	0	0	0	0	0	0	0	0	0	0	0	0	0	0	0	0	0	0	0	0	0.15819	0	0	0	0	0	0	0	0
124	NODE_38948_length_320_cov_0.526316_g38229_i0	320	CCGCGAGTACGGCGTTCAAAACGCCGGTCGTTGTGACTTGGTCATCGTCGNNNNNNNNNNNNNNNNNNNNNNNNNNNNNNNNNNNNNNNNNNNNNNNNNNNNNNNNNNNNNNNNNNNNNNNNNNNNNNNNNNNNNNNNNNNNNNNNNNNNNNNNNNNNNNNNNNNNNNNNNNNNNNNNNNNNNNNNNNNNNNNNNNNNNNNNNNNNNNNNNNNNNNNNNNNNNNNNNNNNNNNNNNNNNNNNNNNNNNNNNNNNNNNNNNNNNNNNNNNNCTGGAGAACTACCGCAAAGGGATGCGCAGGAGGATGCGAGGCAAGGCCGG	0	0	0	0	0	0	0	0	0	0	0	0	0	0	0	0	0	0	0	0	0	0	0	0	0	0	0	0	0	0	0	0	0	0	0	0	0	0	0	0	0	0	0	0	0	0
125	NODE_38949_length_320_cov_0.526316_g38230_i0	320	TATTTGCATCGTATTTTTGAAAGCAAGCCGATTTTCGAAAGCAACACTTGNNNNNNNNNNNNNNNNNNNNNNNNNNNNNNNNNNNNNNNNNNNNNNNNNNNNNNNNNNNNNNNNNNNNNNNNNNNNNNNNNNNNNNNNNNNNNNNNNNNNNNNNNNNNNNNNNNNNNNNNNNNNNNNNNNNNNNNNNNNNNNNNNNNNNNNNNNNNNNNNNNNNNNNNNNNNNNNNNNNNNNNNNNNNNNNNNNNNNNNNNNNNNNNNNNNNNNNNNNNNTCCATGGAGAAGTGTCACTAAGTGTTAATTTCGGGTAAAACATAATTTTA	0	0	0	0	0	0	0	0	0	0	0	0	0	0	0	0	0	0	0	0	0	0	0	0	0	0	0	0	0	0	0	0	0	0	0	0	0	0.15819	0	0	0	0	0	0	0	0
126	NODE_38950_length_320_cov_0.526316_g38231_i0	320	CTCTCCACGCCAACAACGGGAGGCCGAGGTGGGTGTATCACCTCGGGGGANNNNNNNNNNNNNNNNNNNNNNNNNNNNNNNNNNNNNNNNNNNNNNNNNNNNNNNNNNNNNNNNNNNNNNNNNNNNNNNNNNNNNNNNNNNNNNNNNNNNNNNNNNNNNNNNNNNNNNNNNNNNNNNNNNNNNNNNNNNNNNNNNNNNNNNNNNNNNNNNNNNNNNNNNNNNNNNNNNNNNNNNNNNNNNNNNNNNNNNNNNNNNNNNNNNNNNNNNNNNTAAATGGGCCAAACCTAGCTACTGCTTCGCTCCACGAGAAAAGCGATCGC	0	0	0	0	0	0	0	0	0	0	0	0	0	0	0	0.279984	0	0	0	0	0	0	0	0	0	0	0	0	0	0	0	0	0	0	0	0	0	0	0	0	0	0	0	0	0	0
127	NODE_38952_length_320_cov_0.526316_g38233_i0	320	AATTGATAGAGGACATTTAGGGGAAGTAGAGTATAAGATACTTGAAATAGNNNNNNNNNNNNNNNNNNNNNNNNNNNNNNNNNNNNNNNNNNNNNNNNNNNNNNNNNNNNNNNNNNNNNNNNNNNNNNNNNNNNNNNNNNNNNNNNNNNNNNNNNNNNNNNNNNNNNNNNNNNNNNNNNNNNNNNNNNNNNNNNNNNNNNNNNNNNNNNNNNNNNNNNNNNNNNNNNNNNNNNNNNNNNNNNNNNNNNNNNNNNNNNNNNNNNNNNNNNNCAAATAAGTTAGATCAAATGCTTAAAGGAAAGTTACTTACTAGATACTAT	0	0	0	0	0	0	0	0	0	0	0	0	0	0	0	0	0	0	0	0	0	0	0	0	0	0	0	0	0	0	0	0	0	0	0	0	0	0.15819	0	0	0	0	0	0	0	0
128	NODE_38956_length_320_cov_0.526316_g38237_i0	320	CGCGATAATCGTTGCCGTGGTCTCCCGTTAGATGATCGAGTTCCCGCTGGNNNNNNNNNNNNNNNNNNNNNNNNNNNNNNNNNNNNNNNNNNNNNNNNNNNNNNNNNNNNNNNNNNNNNNNNNNNNNNNNNNNNNNNNNNNNNNNNNNNNNNNNNNNNNNNNNNNNNNNNNNNNNNNNNNNNNNNNNNNNNNNNNNNNNNNNNNNNNNNNNNNNNNNNNNNNNNNNNNNNNNNNNNNNNNNNNNNNNNNNNNNNNNNNNNNNNNNNNNNNGTCCGAAATAACTATTGGCGTGTTGTCATAGCAGTTCCCCTTGCGGGACA	0	0	0	0	0	0	0	0	0	0	0	0	0	0	0	0	0	0	0	0	0	0	0	0	0	0	0	0	0	0	0	0	0	0	0	0	0	0.15819	0	0	0	0	0	0	0	0
129	NODE_38961_length_320_cov_0.526316_g38242_i0	320	GTACAAAGGCATGCTCCTTCCCGGGATCATCGCTCTCGCGATGCTCCTCTNNNNNNNNNNNNNNNNNNNNNNNNNNNNNNNNNNNNNNNNNNNNNNNNNNNNNNNNNNNNNNNNNNNNNNNNNNNNNNNNNNNNNNNNNNNNNNNNNNNNNNNNNNNNNNNNNNNNNNNNNNNNNNNNNNNNNNNNNNNNNNNNNNNNNNNNNNNNNNNNNNNNNNNNNNNNNNNNNNNNNNNNNNNNNNNNNNNNNNNNNNNNNNNNNNNNNNNNNNNNTTCCAGTTCACGAAAGAGATCGAGGATCGGCTCCTCTCGCCGATCGAGAT	0	0	0	0	0	0	0	0	0	0	0	0	0	0	0	0	0	0	0	0	0	0	0	0	0	0	0	0	0	0	0	0	0	0	0	0	0	0.15819	0	0	0	0	0	0	0	0
130	NODE_38973_length_320_cov_0.526316_g38254_i0	320	CTAGGGACTCCCCGAAATAAAGTAATCCGCTGATCCCTCTCGCACAGTAANNNNNNNNNNNNNNNNNNNNNNNNNNNNNNNNNNNNNNNNNNNNNNNNNNNNNNNNNNNNNNNNNNNNNNNNNNNNNNNNNNNNNNNNNNNNNNNNNNNNNNNNNNNNNNNNNNNNNNNNNNNNNNNNNNNNNNNNNNNNNNNNNNNNNNNNNNNNNNNNNNNNNNNNNNNNNNNNNNNNNNNNNNNNNNNNNNNNNNNNNNNNNNNNNNNNNNNNNNNNTAAACTGTGCTCGTGGGAGTGTCCCTGGTCACGGTGACTCTATCCTGGAG	0	0	0	0	0	0	0	0	0	0	0	0	0	0	0	0	0	0	0	0	0	0	0	0	0	0	0	0	0	0	0	0	0	0	0	0	0	0.157874	0	0	0	0	0	0	0	0
131	NODE_38978_length_320_cov_0.526316_g38259_i0	320	GTCTATGGTACCCTTTACTAACACTAATCTAAACTGCAATCCCTTTACTCNNNNNNNNNNNNNNNNNNNNNNNNNNNNNNNNNNNNNNNNNNNNNNNNNNNNNNNNNNNNNNNNNNNNNNNNNNNNNNNNNNNNNNNNNNNNNNNNNNNNNNNNNNNNNNNNNNNNNNNNNNNNNNNNNNNNNNNNNNNNNNNNNNNNNNNNNNNNNNNNNNNNNNNNNNNNNNNNNNNNNNNNNNNNNNNNNNNNNNNNNNNNNNNNNNNNNNNNNNNNTACTTCATTCTAAAATACAACTCTATGTTTCTATGTCCCCTATATTCATC	0	0	0	0	0	0	0	0	0	0	0	0	0	0	0	0.280546	0	0	0	0	0	0	0	0	0	0	0	0	0	0	0	0	0	0	0	0	0	0	0	0	0	0	0	0	0	0
132	NODE_38985_length_320_cov_0.526316_g38266_i0	320	GTTTGTTGGCGTTTGGGTCGGAGGGGCTCTGCCCGTTTATATGCGCGTCGNNNNNNNNNNNNNNNNNNNNNNNNNNNNNNNNNNNNNNNNNNNNNNNNNNNNNNNNNNNNNNNNNNNNNNNNNNNNNNNNNNNNNNNNNNNNNNNNNNNNNNNNNNNNNNNNNNNNNNNNNNNNNNNNNNNNNNNNNNNNNNNNNNNNNNNNNNNNNNNNNNNNNNNNNNNNNNNNNNNNNNNNNNNNNNNNNNNNNNNNNNNNNNNNNNNNNNNNNNNNGGCTTCCAGCTTCCCAGCTTACCAGCTTACCAGCTTCCATGCGACAAGAG	0	0	0	0	0	0	0	0	0	0	0	0	0	0	0	0	0	0	0	0	0	0	0	0	0	0	0	0	0	0	0	0	0	0	0	0	0	0	0	0	0	0	0	0	0	0
133	NODE_38987_length_320_cov_0.526316_g38268_i0	320	CCATAAAATCAATATCATTAGTGACCATATATTTTTCATCACTAAAACATNNNNNNNNNNNNNNNNNNNNNNNNNNNNNNNNNNNNNNNNNNNNNNNNNNNNNNNNNNNNNNNNNNNNNNNNNNNNNNNNNNNNNNNNNNNNNNNNNNNNNNNNNNNNNNNNNNNNNNNNNNNNNNNNNNNNNNNNNNNNNNNNNNNNNNNNNNNNNNNNNNNNNNNNNNNNNNNNNNNNNNNNNNNNNNNNNNNNNNNNNNNNNNNNNNNNNNNNNNNNAATATTAGTGGCGGAACTACTATCTTATATCTAAAAAGAACTTGTAATAG	0	0	0	0	0	0	0	0	0	0	0	0	0	0	0	0.280546	0	0	0	0	0	0	0	0	0	0	0	0	0	0	0	0	0	0	0	0	0	0	0	0	0	0	0	0	0	0
134	NODE_38988_length_320_cov_0.526316_g38269_i0	320	TTTATCCATATATAAATATAGGCGTATTATAATTTAACTCATTTTAATCCNNNNNNNNNNNNNNNNNNNNNNNNNNNNNNNNNNNNNNNNNNNNNNNNNNNNNNNNNNNNNNNNNNNNNNNNNNNNNNNNNNNNNNNNNNNNNNNNNNNNNNNNNNNNNNNNNNNNNNNNNNNNNNNNNNNNNNNNNNNNNNNNNNNNNNNNNNNNNNNNNNNNNNNNNNNNNNNNNNNNNNNNNNNNNNNNNNNNNNNNNNNNNNNNNNNNNNNNNNNNTAAATAAAGAAATGAGATCTCTCAAAATAATTTGAGGCCTCCACAAACTT	0	0	0	0	0	0	0	0	0	0	0	0	0	0	0	0.280546	0	0	0	0	0	0	0	0	0	0	0	0	0	0	0	0	0	0	0	0	0	0	0	0	0	0	0	0	0	0
135	NODE_38997_length_320_cov_0.526316_g38278_i0	320	TTGGGGTGATGGGAAAAGTCCTAAATGCCTCTCAAAAGATTAAACTTGTANNNNNNNNNNNNNNNNNNNNNNNNNNNNNNNNNNNNNNNNNNNNNNNNNNNNNNNNNNNNNNNNNNNNNNNNNNNNNNNNNNNNNNNNNNNNNNNNNNNNNNNNNNNNNNNNNNNNNNNNNNNNNNNNNNNNNNNNNNNNNNNNNNNNNNNNNNNNNNNNNNNNNNNNNNNNNNNNNNNNNNNNNNNNNNNNNNNNNNNNNNNNNNNNNNNNNNNNNNNNGTCGTTTGGAGGCTTAGCGTGATGCAATTTCATGCTCATCGCTATACCTA	0	0	0	0	0	0	0	0	0	0	0	0	0	0	0	0.279984	0	0	0	0	0	0	0	0	0	0	0	0	0	0	0	0	0	0	0	0	0	0	0	0	0	0	0	0	0	0
136	NODE_39002_length_320_cov_0.526316_g38283_i0	320	TTGGGAGAAATTTGAAAATTATGTGATTAACACCAACATATCTACCTCTTNNNNNNNNNNNNNNNNNNNNNNNNNNNNNNNNNNNNNNNNNNNNNNNNNNNNNNNNNNNNNNNNNNNNNNNNNNNNNNNNNNNNNNNNNNNNNNNNNNNNNNNNNNNNNNNNNNNNNNNNNNNNNNNNNNNNNNNNNNNNNNNNNNNNNNNNNNNNNNNNNNNNNNNNNNNNNNNNNNNNNNNNNNNNNNNNNNNNNNNNNNNNNNNNNNNNNNNNNNNNAAGGTAAAAAGAATATTTCAGATAAACTTTAAACTTAAAAATAAAGTCTT	0	0	0	0	0	0	0	0	0	0	0	0	0	0	0	0.280546	0	0	0	0	0	0	0	0	0	0	0	0	0	0	0	0	0	0	0	0	0	0	0	0	0	0	0	0	0	0
137	NODE_39004_length_320_cov_0.526316_g38285_i0	320	TTCAAAATCGTCTAAAATAGGCAATACCGCACCAATTGTTTTCTCGCTACNNNNNNNNNNNNNNNNNNNNNNNNNNNNNNNNNNNNNNNNNNNNNNNNNNNNNNNNNNNNNNNNNNNNNNNNNNNNNNNNNNNNNNNNNNNNNNNNNNNNNNNNNNNNNNNNNNNNNNNNNNNNNNNNNNNNNNNNNNNNNNNNNNNNNNNNNNNNNNNNNNNNNNNNNNNNNNNNNNNNNNNNNNNNNNNNNNNNNNNNNNNNNNNNNNNNNNNNNNNNTTCCTGTTCGTTAGCGTTTTCTGCGTTAGCCTCTTGAGTTTCTTCCGTTT	0	0	0	0	0	0	0	0	0	0	0	0	0	0	0	0	0	0	0	0	0	0	0	0	0	0	0	0	0	0	0	0	0	0	0	0	0	0	0	0	0	0	0	0	0	0
138	NODE_39009_length_320_cov_0.526316_g38290_i0	320	TTCACATTTTTCCGCATACCTTTTCACATCATTTTTCATACCAACCCAATNNNNNNNNNNNNNNNNNNNNNNNNNNNNNNNNNNNNNNNNNNNNNNNNNNNNNNNNNNNNNNNNNNNNNNNNNNNNNNNNNNNNNNNNNNNNNNNNNNNNNNNNNNNNNNNNNNNNNNNNNNNNNNNNNNNNNNNNNNNNNNNNNNNNNNNNNNNNNNNNNNNNNNNNNNNNNNNNNNNNNNNNNNNNNNNNNNNNNNNNNNNNNNNNNNNNNNNNNNNNTCATGAGAAGTATGTAGTGCCAGAATTAAAGTTGAGGTTTTAGAAAGCAC	0	0	0	0	0	0	0	0	0	0	0	0	0	0	0	0.280546	0	0	0	0	0	0	0	0	0	0	0	0	0	0	0	0	0	0	0	0	0	0	0	0	0	0	0	0	0	0
139	NODE_39012_length_320_cov_0.526316_g38293_i0	320	GAACAAAGCAAAAACAAGGTGGAGTTTCTTTAACAACCAACAACAAAATTNNNNNNNNNNNNNNNNNNNNNNNNNNNNNNNNNNNNNNNNNNNNNNNNNNNNNNNNNNNNNNNNNNNNNNNNNNNNNNNNNNNNNNNNNNNNNNNNNNNNNNNNNNNNNNNNNNNNNNNNNNNNNNNNNNNNNNNNNNNNNNNNNNNNNNNNNNNNNNNNNNNNNNNNNNNNNNNNNNNNNNNNNNNNNNNNNNNNNNNNNNNNNNNNNNNNNNNNNNNNTGGTGCATTAAACATCACTATCCTAACTTGCCAACTCAAAATAGAAGAAA	0	0	0	0	0	0	0	0	0	0	0	0	0	0	0	0.280546	0	0	0	0	0	0	0	0	0	0	0	0	0	0	0	0	0	0	0	0	0	0	0	0	0	0	0	0	0	0
140	NODE_39013_length_320_cov_0.526316_g38294_i0	320	CATAATGCATTAGCATGTTGTTCATGCCCAAGTATAAGGTTATGTCTTCCNNNNNNNNNNNNNNNNNNNNNNNNNNNNNNNNNNNNNNNNNNNNNNNNNNNNNNNNNNNNNNNNNNNNNNNNNNNNNNNNNNNNNNNNNNNNNNNNNNNNNNNNNNNNNNNNNNNNNNNNNNNNNNNNNNNNNNNNNNNNNNNNNNNNNNNNNNNNNNNNNNNNNNNNNNNNNNNNNNNNNNNNNNNNNNNNNNNNNNNNNNNNNNNNNNNNNNNNNNNNGTGATTGATGAAATGTCCATGAGAATTAAATAGTAAAATTATGATATTCT	0	0	0	0	0	0	0	0	0	0	0	0	0	0	0	0.280546	0	0	0	0	0	0	0	0	0	0	0	0	0	0	0	0	0	0	0	0	0	0	0	0	0	0	0	0	0	0
141	NODE_39015_length_320_cov_0.526316_g38296_i0	320	GTATCCACGATTAGATACTCGGTCAAAAATACACGCTCTACATGGCAGACNNNNNNNNNNNNNNNNNNNNNNNNNNNNNNNNNNNNNNNNNNNNNNNNNNNNNNNNNNNNNNNNNNNNNNNNNNNNNNNNNNNNNNNNNNNNNNNNNNNNNNNNNNNNNNNNNNNNNNNNNNNNNNNNNNNNNNNNNNNNNNNNNNNNNNNNNNNNNNNNNNNNNNNNNNNNNNNNNNNNNNNNNNNNNNNNNNNNNNNNNNNNNNNNNNNNNNNNNNNNTCTACTGCCTGGCCAATGACAGTGTTCCAGAGACATTATTACATGACGAG	0	0	0	0	0	0	0	0	0	0	0	0	0	0	0	0	0	0	0	0	0	0	0	0	0	0	0	0	0	0	0	0	0	0	0	0	0	0.15819	0	0	0	0	0	0	0	0
142	NODE_39016_length_320_cov_0.526316_g38297_i0	320	CCAAGAGAAATGTATTTTGAACCGTATAGAATTTCCTTAATACCGGATATNNNNNNNNNNNNNNNNNNNNNNNNNNNNNNNNNNNNNNNNNNNNNNNNNNNNNNNNNNNNNNNNNNNNNNNNNNNNNNNNNNNNNNNNNNNNNNNNNNNNNNNNNNNNNNNNNNNNNNNNNNNNNNNNNNNNNNNNNNNNNNNNNNNNNNNNNNNNNNNNNNNNNNNNNNNNNNNNNNNNNNNNNNNNNNNNNNNNNNNNNNNNNNNNNNNNNNNNNNNNCACCTTTATGTTTCAGATGCTCCCATTCCTTGAATAAGTTCAGTCAATCA	0	0	0	0	0	0	0	0	0	0	0	0	0	0	0	0.280546	0	0	0	0	0	0	0	0	0	0	0	0	0	0	0	0	0	0	0	0	0	0	0	0	0	0	0	0	0	0
143	NODE_39018_length_320_cov_0.526316_g38299_i0	320	GACATTATTTTAACTCTGAATTGCAATGAAAAATATCGTACTGTATAAATNNNNNNNNNNNNNNNNNNNNNNNNNNNNNNNNNNNNNNNNNNNNNNNNNNNNNNNNNNNNNNNNNNNNNNNNNNNNNNNNNNNNNNNNNNNNNNNNNNNNNNNNNNNNNNNNNNNNNNNNNNNNNNNNNNNNNNNNNNNNNNNNNNNNNNNNNNNNNNNNNNNNNNNNNNNNNNNNNNNNNNNNNNNNNNNNNNNNNNNNNNNNNNNNNNNNNNNNNNNNTCCTTAAAATTAAGGGATTACTAAGCTAATTAGAGGGCATATATATATAG	0	0	0	0	0	0	0	0	0	0	0	0	0	0	0	0	0	0	0	0	0	0	0	0	0	0	0	0	0	0	0	0	0	0	0	0	0	0.15819	0	0	0	0	0	0	0	0
144	NODE_39023_length_320_cov_0.526316_g38304_i0	320	ACAACAGAAATTAGCTTCTTTCAAAACAAAATTGTTATTTTCAATCGAAANNNNNNNNNNNNNNNNNNNNNNNNNNNNNNNNNNNNNNNNNNNNNNNNNNNNNNNNNNNNNNNNNNNNNNNNNNNNNNNNNNNNNNNNNNNNNNNNNNNNNNNNNNNNNNNNNNNNNNNNNNNNNNNNNNNNNNNNNNNNNNNNNNNNNNNNNNNNNNNNNNNNNNNNNNNNNNNNNNNNNNNNNNNNNNNNNNNNNNNNNNNNNNNNNNNNNNNNNNNNTATAAATTTCTTCAATCGCTAATGATTGTGCGCGATACTTGTCAAAAAAC	0	0	0	0	0	0	0	0	0	0	0	0	0	0	0	0	0	0	0	0	0	0	0	0	0	0	0	0	0	0	0	0	0	0	0	0	0	0.15819	0	0	0	0	0	0	0	0
145	NODE_39026_length_320_cov_0.526316_g38307_i0	320	GGCCGCAGGCAGCAGTGCCATGTATGCGGCGATGACATCCTTGGGTCATGNNNNNNNNNNNNNNNNNNNNNNNNNNNNNNNNNNNNNNNNNNNNNNNNNNNNNNNNNNNNNNNNNNNNNNNNNNNNNNNNNNNNNNNNNNNNNNNNNNNNNNNNNNNNNNNNNNNNNNNNNNNNNNNNNNNNNNNNNNNNNNNNNNNNNNNNNNNNNNNNNNNNNNNNNNNNNNNNNNNNNNNNNNNNNNNNNNNNNNNNNNNNNNNNNNNNNNNNNNNNAAGGTCCTGATCCTGGGGGCCGGTCTTGCTGGCATGACTGCAGCGTTGGA	0	0	0	0	0	0	0	0	0	0	0	0	0	0	0	0	0	0	0	0	0	0	0	0	0	0	0	0	0	0	0	0	0	0	0	0	0	0.15819	0	0	0	0	0	0	0	0
146	NODE_39027_length_320_cov_0.526316_g38308_i0	320	GAACAATCTCATCTCAGTGATCAAAATCTTAGTCATCCACGTAAAAGTGGNNNNNNNNNNNNNNNNNNNNNNNNNNNNNNNNNNNNNNNNNNNNNNNNNNNNNNNNNNNNNNNNNNNNNNNNNNNNNNNNNNNNNNNNNNNNNNNNNNNNNNNNNNNNNNNNNNNNNNNNNNNNNNNNNNNNNNNNNNNNNNNNNNNNNNNNNNNNNNNNNNNNNNNNNNNNNNNNNNNNNNNNNNNNNNNNNNNNNNNNNNNNNNNNNNNNNNNNNNNNCCTACGTTGCCACTAAGTTCTGGGGTATGAAATCGTAGTAACGTACCCAT	0	0	0	0	0	0	0	0	0	0	0	0	0	0	0	0	0	0	0	0	0	0	0	0	0	0	0	0	0	0	0	0	0	0	0	0	0	0.15819	0	0	0	0	0	0	0	0
147	NODE_39033_length_320_cov_0.526316_g38314_i0	320	TTTATTTCGTGTGAAAGAGTTAGGATTTGTTCTTGGGATGAAAAATGGTTNNNNNNNNNNNNNNNNNNNNNNNNNNNNNNNNNNNNNNNNNNNNNNNNNNNNNNNNNNNNNNNNNNNNNNNNNNNNNNNNNNNNNNNNNNNNNNNNNNNNNNNNNNNNNNNNNNNNNNNNNNNNNNNNNNNNNNNNNNNNNNNNNNNNNNNNNNNNNNNNNNNNNNNNNNNNNNNNNNNNNNNNNNNNNNNNNNNNNNNNNNNNNNNNNNNNNNNNNNNNTGTTATGGATGAATTGGGTAAGGGGAATTGACCCAATTACCCTTAAATGA	0	0	0	0	0	0	0	0	0	0	0	0	0	0	0	0.280546	0	0	0	0	0	0	0	0	0	0	0	0	0	0	0	0	0	0	0	0	0	0	0	0	0	0	0	0	0	0
148	NODE_39034_length_320_cov_0.526316_g38315_i0	320	GGCCGAACGCCAGCGAGGCGGCGATGAACCCCGCCATTTCGCGATCGTCTNNNNNNNNNNNNNNNNNNNNNNNNNNNNNNNNNNNNNNNNNNNNNNNNNNNNNNNNNNNNNNNNNNNNNNNNNNNNNNNNNNNNNNNNNNNNNNNNNNNNNNNNNNNNNNNNNNNNNNNNNNNNNNNNNNNNNNNNNNNNNNNNNNNNNNNNNNNNNNNNNNNNNNNNNNNNNNNNNNNNNNNNNNNNNNNNNNNNNNNNNNNNNNNNNNNNNNNNNNNNCGGACGATTTGGATCGGGTCGGTCGCCGAATTGGGGTAGTTGAAATCGGC	0	0	0	0	0	0	0	0	0	0	0	0	0	0	0	0	0	0	0	0	0	0	0	0	0	0	0	0	0	0	0	0	0	0	0	0	0	0.15819	0	0	0	0	0	0	0	0
149	NODE_39038_length_320_cov_0.526316_g38319_i0	320	TGTCACAATCATCCTTGCTGGACTGAGAGGGACACACTTCAATCGTGATTNNNNNNNNNNNNNNNNNNNNNNNNNNNNNNNNNNNNNNNNNNNNNNNNNNNNNNNNNNNNNNNNNNNNNNNNNNNNNNNNNNNNNNNNNNNNNNNNNNNNNNNNNNNNNNNNNNNNNNNNNNNNNNNNNNNNNNNNNNNNNNNNNNNNNNNNNNNNNNNNNNNNNNNNNNNNNNNNNNNNNNNNNNNNNNNNNNNNNNNNNNNNNNNNNNNNNNNNNNNNCTTATATCTTTTTAGAGCGCGGTGATGGTTTTACTTTATAGAAATTGTTG	0	0	0	0	0	0	0	0	0	0	0	0	0	0	0	0.280546	0	0	0	0	0	0	0	0	0	0	0	0	0	0	0	0	0	0	0	0	0	0	0	0	0	0	0	0	0	0
150	NODE_39040_length_320_cov_0.526316_g38321_i0	320	TGCTCTCTGGTGGCGTGGGCGATGACCTAATTATTGGAGGAGGAGGCCACNNNNNNNNNNNNNNNNNNNNNNNNNNNNNNNNNNNNNNNNNNNNNNNNNNNNNNNNNNNNNNNNNNNNNNNNNNNNNNNNNNNNNNNNNNNNNNNNNNNNNNNNNNNNNNNNNNNNNNNNNNNNNNNNNNNNNNNNNNNNNNNNNNNNNNNNNNNNNNNNNNNNNNNNNNNNNNNNNNNNNNNNNNNNNNNNNNNNNNNNNNNNNNNNNNNNNNNNNNNNAGCGACTTGATCCTGGACTTTAATCCGAAAGAAGATGTCGCGTCAAACAA	0	0	0	0	0	0	0	0	0	0	0	0	0	0	0	0	0	0	0	0	0	0	0	0	0	0	0	0	0	0	0	0	0	0	0	0	0	0.15819	0	0	0	0	0	0	0	0
151	NODE_39041_length_320_cov_0.526316_g38322_i0	320	CTCATCAACATCTCATTTAGCTTTGACTCTTCAACCTTGGGTCTTTTAGTNNNNNNNNNNNNNNNNNNNNNNNNNNNNNNNNNNNNNNNNNNNNNNNNNNNNNNNNNNNNNNNNNNNNNNNNNNNNNNNNNNNNNNNNNNNNNNNNNNNNNNNNNNNNNNNNNNNNNNNNNNNNNNNNNNNNNNNNNNNNNNNNNNNNNNNNNNNNNNNNNNNNNNNNNNNNNNNNNNNNNNNNNNNNNNNNNNNNNNNNNNNNNNNNNNNNNNNNNNNNCCCATTTTATATTTCTTCACTTTGCCTCTTCGTTAAATATTTTGATATTT	0	0	0	0	0	0	0	0	0	0	0	0	0	0	0	0.280546	0	0	0	0	0	0	0	0	0	0	0	0	0	0	0	0	0	0	0	0	0	0	0	0	0	0	0	0	0	0
152	NODE_39042_length_320_cov_0.526316_g38323_i0	320	CGGTGTTCAATCCAAAGAATGATGCTCACATCATCACTATTGTCACAAGGNNNNNNNNNNNNNNNNNNNNNNNNNNNNNNNNNNNNNNNNNNNNNNNNNNNNNNNNNNNNNNNNNNNNNNNNNNNNNNNNNNNNNNNNNNNNNNNNNNNNNNNNNNNNNNNNNNNNNNNNNNNNNNNNNNNNNNNNNNNNNNNNNNNNNNNNNNNNNNNNNNNNNNNNNNNNNNNNNNNNNNNNNNNNNNNNNNNNNNNNNNNNNNNNNNNNNNNNNNNNATCTTAGCAAAGACCCTAATGAAAAGGCAAATGATAAACAAGAAAATGTG	0	0	0	0	0	0	0	0	0	0	0	0	0	0	0	0.280546	0	0	0	0	0	0	0	0	0	0	0	0	0	0	0	0	0	0	0	0	0	0	0	0	0	0	0	0	0	0
153	NODE_39049_length_320_cov_0.526316_g38330_i0	320	GCTTGTAAAAGTCGTCCCACGTCTGCGCGTTCACCAGGCCTTCCTTCTTGNNNNNNNNNNNNNNNNNNNNNNNNNNNNNNNNNNNNNNNNNNNNNNNNNNNNNNNNNNNNNNNNNNNNNNNNNNNNNNNNNNNNNNNNNNNNNNNNNNNNNNNNNNNNNNNNNNNNNNNNNNNNNNNNNNNNNNNNNNNNNNNNNNNNNNNNNNNNNNNNNNNNNNNNNNNNNNNNNNNNNNNNNNNNNNNNNNNNNNNNNNNNNNNNNNNNNNNNNNNNGGCCTTCGCGGGGCGTCCAAATTGCACTCCTTCGAAGATCGGCGCCTTGT	0	0	0	0	0	0	0	0	0	0	0	0	0	0	0	0	0	0	0	0	0	0	0	0	0	0	0	0	0	0	0	0	0	0	0	0	0	0.157874	0	0	0	0	0	0	0	0
154	NODE_39050_length_320_cov_0.526316_g38331_i0	320	GGAGAATGTCATCCGGACGGGCGATCGCGCCGATTTTCCGGACCACGTGCNNNNNNNNNNNNNNNNNNNNNNNNNNNNNNNNNNNNNNNNNNNNNNNNNNNNNNNNNNNNNNNNNNNNNNNNNNNNNNNNNNNNNNNNNNNNNNNNNNNNNNNNNNNNNNNNNNNNNNNNNNNNNNNNNNNNNNNNNNNNNNNNNNNNNNNNNNNNNNNNNNNNNNNNNNNNNNNNNNNNNNNNNNNNNNNNNNNNNNNNNNNNNNNNNNNNNNNNNNNNACTGCCCGTGCCTCGCGTCTTCCTTGAGCGTGACGAAGGCCGTAATTGCC	0	0	0	0	0	0	0	0	0	0	0	0	0	0	0	0	0	0	0	0	0	0	0	0	0	0	0	0	0	0	0	0	0	0	0	0	0	0.15819	0	0	0	0	0	0	0	0
155	NODE_39054_length_320_cov_0.526316_g38335_i0	320	GCTCGGTCCGCTCCGGGGTCGTTTCCTCTCAAGCAGTTGTCTGGTGGCTCNNNNNNNNNNNNNNNNNNNNNNNNNNNNNNNNNNNNNNNNNNNNNNNNNNNNNNNNNNNNNNNNNNNNNNNNNNNNNNNNNNNNNNNNNNNNNNNNNNNNNNNNNNNNNNNNNNNNNNNNNNNNNNNNNNNNNNNNNNNNNNNNNNNNNNNNNNNNNNNNNNNNNNNNNNNNNNNNNNNNNNNNNNNNNNNNNNNNNNNNNNNNNNNNNNNNNNNNNNNNCGTCTCGGCACCCTCAAACCGCAATTCTTGACCGTCCTTCTCCATCTGAG	0	0	0	0	0	0	0	0	0	0	0	0	0	0	0	0	0	0	0	0	0	0	0	0	0	0	0	0	0	0	0	0	0	0	0	0	0	0	0	0	0	0	0	0	0	0
156	NODE_39055_length_320_cov_0.526316_g38336_i0	320	TTAGCCCGAGAATAGTTCACACCAAATTTGTAGAAATGTGTCATCCTCTANNNNNNNNNNNNNNNNNNNNNNNNNNNNNNNNNNNNNNNNNNNNNNNNNNNNNNNNNNNNNNNNNNNNNNNNNNNNNNNNNNNNNNNNNNNNNNNNNNNNNNNNNNNNNNNNNNNNNNNNNNNNNNNNNNNNNNNNNNNNNNNNNNNNNNNNNNNNNNNNNNNNNNNNNNNNNNNNNNNNNNNNNNNNNNNNNNNNNNNNNNNNNNNNNNNNNNNNNNNNGTGGCCAAAGTTGTAAAATTATTAACCTCCATCACACCCATGGGTTTGTT	0	0	0	0	0	0	0	0	0	0	0	0	0	0	0	0	0	0	0	0	0	0	0	0	0	0	0	0	0	0	0	0	0	0	0	0	0	0	0	0	0	0	0	0	0	0
157	NODE_39059_length_320_cov_0.526316_g38340_i0	320	TTTTGCCCCTGCGCAATGATGCATACCGAGGGTTCATAAACCGTTAGCGTNNNNNNNNNNNNNNNNNNNNNNNNNNNNNNNNNNNNNNNNNNNNNNNNNNNNNNNNNNNNNNNNNNNNNNNNNNNNNNNNNNNNNNNNNNNNNNNNNNNNNNNNNNNNNNNNNNNNNNNNNNNNNNNNNNNNNNNNNNNNNNNNNNNNNNNNNNNNNNNNNNNNNNNNNNNNNNNNNNNNNNNNNNNNNNNNNNNNNNNNNNNNNNNNNNNNNNNNNNNNGTTGTACCGCATCGATTGCGGTATCGGTAAAACCTTCGTATTTGGTGAAT	0	0	0	0	0	0	0	0	0	0	0	0	0	0	0	0	0	0	0	0	0	0	0	0	0	0	0	0	0	0	0	0	0	0	0	0	0	0.15819	0	0	0	0	0	0	0	0
158	NODE_39067_length_320_cov_0.526316_g38348_i0	320	CGATTTAAATTTTTTACAAAAAACGGCTCTATCGATTTTGATGAAATTTGNNNNNNNNNNNNNNNNNNNNNNNNNNNNNNNNNNNNNNNNNNNNNNNNNNNNNNNNNNNNNNNNNNNNNNNNNNNNNNNNNNNNNNNNNNNNNNNNNNNNNNNNNNNNNNNNNNNNNNNNNNNNNNNNNNNNNNNNNNNNNNNNNNNNNNNNNNNNNNNNNNNNNNNNNNNNNNNNNNNNNNNNNNNNNNNNNNNNNNNNNNNNNNNNNNNNNNNNNNNNTAGTGAGACGGAAGTTATGGGACTTTTTATGTGAATTTTAGCGATTTAAA	0	0	0	0	0	0	0	0	0	0	0	0	0	0	0	0	0	0	0	0	0	0	0	0	0	0	0	0	0	0	0	0	0	0	0	0	0	0.15819	0	0	0	0	0	0	0	0
159	NODE_39075_length_320_cov_0.526316_g38356_i0	320	CTATCTTAAAATAAATAATATTCCTTTTTATAGCAAAGAAATCTCTTTAGNNNNNNNNNNNNNNNNNNNNNNNNNNNNNNNNNNNNNNNNNNNNNNNNNNNNNNNNNNNNNNNNNNNNNNNNNNNNNNNNNNNNNNNNNNNNNNNNNNNNNNNNNNNNNNNNNNNNNNNNNNNNNNNNNNNNNNNNNNNNNNNNNNNNNNNNNNNNNNNNNNNNNNNNNNNNNNNNNNNNNNNNNNNNNNNNNNNNNNNNNNNNNNNNNNNNNNNNNNNNATAGTACATTGCGGATTGTTTTCTTCAATGAAAATCAGAAATTTAAAGAT	0	0	0	0	0	0	0	0	0	0	0	0	0	0	0	0.280546	0	0	0	0	0	0	0	0	0	0	0	0	0	0	0	0	0	0	0	0	0	0	0	0	0	0	0	0	0	0
160	NODE_39078_length_320_cov_0.526316_g38359_i0	320	TGATAGTGCTAGAACAAGCATAGTTCATGTTATTTTTTATGGAATTGGATNNNNNNNNNNNNNNNNNNNNNNNNNNNNNNNNNNNNNNNNNNNNNNNNNNNNNNNNNNNNNNNNNNNNNNNNNNNNNNNNNNNNNNNNNNNNNNNNNNNNNNNNNNNNNNNNNNNNNNNNNNNNNNNNNNNNNNNNNNNNNNNNNNNNNNNNNNNNNNNNNNNNNNNNNNNNNNNNNNNNNNNNNNNNNNNNNNNNNNNNNNNNNNNNNNNNNNNNNNNNATGGAAAAAGAGTGCATTGAGGTCATTCTCAGTCAAAAATAAGCTTGGGT	0	0	0	0	0	0	0	0	0	0	0	0	0	0	0	0.280546	0	0	0	0	0	0	0	0	0	0	0	0	0	0	0	0	0	0	0	0	0	0	0	0	0	0	0	0	0	0
161	NODE_39079_length_320_cov_0.526316_g38360_i0	320	ACCTGCCCTACGTCGATAAGCGTGAGCATTACGTTGGTCAAAATTTGCTTNNNNNNNNNNNNNNNNNNNNNNNNNNNNNNNNNNNNNNNNNNNNNNNNNNNNNNNNNNNNNNNNNNNNNNNNNNNNNNNNNNNNNNNNNNNNNNNNNNNNNNNNNNNNNNNNNNNNNNNNNNNNNNNNNNNNNNNNNNNNNNNNNNNNNNNNNNNNNNNNNNNNNNNNNNNNNNNNNNNNNNNNNNNNNNNNNNNNNNNNNNNNNNNNNNNNNNNNNNNNAATCAAGCGGCTTGGCGTTTAGAGCGCACGCTCAGTTCAAGAAGGCTGAT	0	0	0	0	0	0	0	0	0	0	0	0	0	0	0	0	0	0	0	0	0	0	0	0	0	0	0	0	0	0	0	0	0	0	0	0	0	0.15819	0	0	0	0	0	0	0	0
162	NODE_39081_length_320_cov_0.526316_g38362_i0	320	AAACGTTAATAGGAACTACTTATTCAGAATCTTTAAATTTAAATGATTTTNNNNNNNNNNNNNNNNNNNNNNNNNNNNNNNNNNNNNNNNNNNNNNNNNNNNNNNNNNNNNNNNNNNNNNNNNNNNNNNNNNNNNNNNNNNNNNNNNNNNNNNNNNNNNNNNNNNNNNNNNNNNNNNNNNNNNNNNNNNNNNNNNNNNNNNNNNNNNNNNNNNNNNNNNNNNNNNNNNNNNNNNNNNNNNNNNNNNNNNNNNNNNNNNNNNNNNNNNNNNGTCAAAATTTTTGCAAAACAGCAAGTCAAGCTCCATTATTGTATAATTAC	0	0	0	0	0	0	0	0	0	0	0	0	0	0	0	0.280546	0	0	0	0	0	0	0	0	0	0	0	0	0	0	0	0	0	0	0	0	0	0	0	0	0	0	0	0	0	0
163	NODE_39088_length_320_cov_0.526316_g38369_i0	320	TGTCGGCGCGCGGTGAAATGCGATCTTCTTGCCGTCGTCGGACACTCGATNNNNNNNNNNNNNNNNNNNNNNNNNNNNNNNNNNNNNNNNNNNNNNNNNNNNNNNNNNNNNNNNNNNNNNNNNNNNNNNNNNNNNNNNNNNNNNNNNNNNNNNNNNNNNNNNNNNNNNNNNNNNNNNNNNNNNNNNNNNNNNNNNNNNNNNNNNNNNNNNNNNNNNNNNNNNNNNNNNNNNNNNNNNNNNNNNNNNNNNNNNNNNNNNNNNNNNNNNNNNGGCCAGAGATCGAGATCTTCCAGATATGCGACTGCTTGTAGTTCTCGTCG	0	0	0	0	0	0	0	0	0	0	0	0	0	0	0	0	0	0	0	0	0	0	0	0	0	0	0	0	0	0	0	0	0	0	0	0	0	0.15819	0	0	0	0	0	0	0	0
164	NODE_39089_length_320_cov_0.526316_g38370_i0	320	CCGGCAACACAACGGGGGACGCGTCCGACGCGTCCCCCGGCCACACACTGNNNNNNNNNNNNNNNNNNNNNNNNNNNNNNNNNNNNNNNNNNNNNNNNNNNNNNNNNNNNNNNNNNNNNNNNNNNNNNNNNNNNNNNNNNNNNNNNNNNNNNNNNNNNNNNNNNNNNNNNNNNNNNNNNNNNNNNNNNNNNNNNNNNNNNNNNNNNNNNNNNNNNNNNNNNNNNNNNNNNNNNNNNNNNNNNNNNNNNNNNNNNNNNNNNNNNNNNNNNNCCAAATTTCCGCTCGAAGTTTTCGACGAAGCGCGCTGCCAGCGTGCGCGC	0	0	0	0	0	0	0	0	0	0	0	0	0	0	0	0	0	0	0	0	0	0	0	0	0	0	0	0	0	0	0	0	0	0	0	0	0	0.157874	0	0	0	0	0	0	0	0
165	NODE_39090_length_320_cov_0.526316_g38371_i0	320	GTGGGTCTCAGCTACCAGTGGAAGTGGCTATCTTTCATTTTATTCTGACTNNNNNNNNNNNNNNNNNNNNNNNNNNNNNNNNNNNNNNNNNNNNNNNNNNNNNNNNNNNNNNNNNNNNNNNNNNNNNNNNNNNNNNNNNNNNNNNNNNNNNNNNNNNNNNNNNNNNNNNNNNNNNNNNNNNNNNNNNNNNNNNNNNNNNNNNNNNNNNNNNNNNNNNNNNNNNNNNNNNNNNNNNNNNNNNNNNNNNNNNNNNNNNNNNNNNNNNNNNNNCCGTTTATTACTGTGCGAAAGATCGCGCGGCAATGGTGGCTGGTACGGGG	0	0	0	0	0	0	0	0	0	0	0	0	0	0	0	0	0	0	0	0	0	0	0	0	0	0	0	0	0	0	0	0	0	0	0	0	0	0.15819	0	0	0	0	0	0	0	0
166	NODE_39092_length_320_cov_0.526316_g38373_i0	320	AAATCGTACGTGGCACACATGTGTGCCTATGTGGAACCTTCAGTGTGTTANNNNNNNNNNNNNNNNNNNNNNNNNNNNNNNNNNNNNNNNNNNNNNNNNNNNNNNNNNNNNNNNNNNNNNNNNNNNNNNNNNNNNNNNNNNNNNNNNNNNNNNNNNNNNNNNNNNNNNNNNNNNNNNNNNNNNNNNNNNNNNNNNNNNNNNNNNNNNNNNNNNNNNNNNNNNNNNNNNNNNNNNNNNNNNNNNNNNNNNNNNNNNNNNNNNNNNNNNNNNCCTCCTAAAGTTCGGGTGTATCTCAGTCTTTTTGCGTATAGTTCAAGGTG	0	0	0	0	0	0	0	0	0	0	0	0	0	0	0	0.280546	0	0	0	0	0	0	0	0	0	0	0	0	0	0	0	0	0	0	0	0	0	0	0	0	0	0	0	0	0	0
167	NODE_39095_length_320_cov_0.526316_g38376_i0	320	GTAATTCAATAGGAAAAGCTGGATTGACAATAAATGCTTGATTCAGCTCTNNNNNNNNNNNNNNNNNNNNNNNNNNNNNNNNNNNNNNNNNNNNNNNNNNNNNNNNNNNNNNNNNNNNNNNNNNNNNNNNNNNNNNNNNNNNNNNNNNNNNNNNNNNNNNNNNNNNNNNNNNNNNNNNNNNNNNNNNNNNNNNNNNNNNNNNNNNNNNNNNNNNNNNNNNNNNNNNNNNNNNNNNNNNNNNNNNNNNNNNNNNNNNNNNNNNNNNNNNNNGCCCCAGTGCACTTATAGCTATAAAAGTGTGAAGACAATGCACTGATAGT	0	0	0	0	0	0	0	0	0	0	0	0	0	0	0	0	0	0	0	0	0	0	0	0	0	0	0	0	0	0	0	0	0	0	0	0	0	0.15819	0	0	0	0	0	0	0	0
168	NODE_39097_length_320_cov_0.526316_g38378_i0	320	ATATAGTGTGATGTATTTATCACGCCAAAATGATTGACAGTTTCAGCAGANNNNNNNNNNNNNNNNNNNNNNNNNNNNNNNNNNNNNNNNNNNNNNNNNNNNNNNNNNNNNNNNNNNNNNNNNNNNNNNNNNNNNNNNNNNNNNNNNNNNNNNNNNNNNNNNNNNNNNNNNNNNNNNNNNNNNNNNNNNNNNNNNNNNNNNNNNNNNNNNNNNNNNNNNNNNNNNNNNNNNNNNNNNNNNNNNNNNNNNNNNNNNNNNNNNNNNNNNNNNGCATCGTCCTGTCGGATGTTGATGGAACGCTGGTCAAGGGCTCAGTGGTT	0	0	0	0	0	0	0	0	0	0	0	0	0	0	0	0.280546	0	0	0	0	0	0	0	0	0	0	0	0	0	0	0	0	0	0	0	0	0	0	0	0	0	0	0	0	0	0
169	NODE_39098_length_320_cov_0.526316_g38379_i0	320	TGTGTTCAAAGTCTTCTTTGATTTCACATTCCCAAACTACTATCACTTTANNNNNNNNNNNNNNNNNNNNNNNNNNNNNNNNNNNNNNNNNNNNNNNNNNNNNNNNNNNNNNNNNNNNNNNNNNNNNNNNNNNNNNNNNNNNNNNNNNNNNNNNNNNNNNNNNNNNNNNNNNNNNNNNNNNNNNNNNNNNNNNNNNNNNNNNNNNNNNNNNNNNNNNNNNNNNNNNNNNNNNNNNNNNNNNNNNNNNNNNNNNNNNNNNNNNNNNNNNNNATTATAGTTATTCACATCATTCTCAACATTTCTATTAATATGTTTTATCC	0	0	0	0	0	0	0	0	0	0	0	0	0	0	0	0	0	0	0	0	0	0	0	0	0	0	0	0	0	0	0	0	0	0	0	0	0	0.157874	0	0	0	0	0	0	0	0
170	NODE_39102_length_320_cov_0.526316_g38383_i0	320	CTGGACAGCAGTTTTCACCCTCTCCTTCACCTCTCTCCTCATTCCAGAGGNNNNNNNNNNNNNNNNNNNNNNNNNNNNNNNNNNNNNNNNNNNNNNNNNNNNNNNNNNNNNNNNNNNNNNNNNNNNNNNNNNNNNNNNNNNNNNNNNNNNNNNNNNNNNNNNNNNNNNNNNNNNNNNNNNNNNNNNNNNNNNNNNNNNNNNNNNNNNNNNNNNNNNNNNNNNNNNNNNNNNNNNNNNNNNNNNNNNNNNNNNNNNNNNNNNNNNNNNNNNACGCCTTTGTTTACTATCCCCTAGCACTGCTAGACACAAGAGGACACGGC	0	0	0	0	0	0	0	0	0	0	0	0	0	0	0	0.280546	0	0	0	0	0	0	0	0	0	0	0	0	0	0	0	0	0	0	0	0	0	0	0	0	0	0	0	0	0	0
171	NODE_39107_length_320_cov_0.526316_g38388_i0	320	GGACCTGCGAAAGCCTTTTAGAATAGACTTTTGAATTCATATGTACTTTTNNNNNNNNNNNNNNNNNNNNNNNNNNNNNNNNNNNNNNNNNNNNNNNNNNNNNNNNNNNNNNNNNNNNNNNNNNNNNNNNNNNNNNNNNNNNNNNNNNNNNNNNNNNNNNNNNNNNNNNNNNNNNNNNNNNNNNNNNNNNNNNNNNNNNNNNNNNNNNNNNNNNNNNNNNNNNNNNNNNNNNNNNNNNNNNNNNNNNNNNNNNNNNNNNNNNNNNNNNNNTTCGACAATACCACAATTAGTCGAAAGTCTGACATTATTCAATCTAAGGG	0	0	0	0	0	0	0	0	0	0	0	0	0	0	0	0	0	0	0	0	0	0	0	0	0	0	0	0	0	0	0	0	0	0	0	0	0	0.157874	0	0	0	0	0	0	0	0
172	NODE_39111_length_320_cov_0.526316_g38392_i0	320	TTCATACATATGAACCCTTGCATTCAGTCTTACCTCATCTAGTATACCAGNNNNNNNNNNNNNNNNNNNNNNNNNNNNNNNNNNNNNNNNNNNNNNNNNNNNNNNNNNNNNNNNNNNNNNNNNNNNNNNNNNNNNNNNNNNNNNNNNNNNNNNNNNNNNNNNNNNNNNNNNNNNNNNNNNNNNNNNNNNNNNNNNNNNNNNNNNNNNNNNNNNNNNNNNNNNNNNNNNNNNNNNNNNNNNNNNNNNNNNNNNNNNNNNNNNNNNNNNNNNTGTAGTCCCTCCATCCCAAATTATGTGTTTCTATTTGACCAAACACGATA	0	0	0	0	0	0	0	0	0	0	0	0	0	0	0	0.280546	0	0	0	0	0	0	0	0	0	0	0	0	0	0	0	0	0	0	0	0	0	0	0	0	0	0	0	0	0	0
173	NODE_39113_length_320_cov_0.526316_g38394_i0	320	GAAATGAGCAGCCATTCATTCAATGAGCAAGCCTTCAGGGCTTGGCCAGGNNNNNNNNNNNNNNNNNNNNNNNNNNNNNNNNNNNNNNNNNNNNNNNNNNNNNNNNNNNNNNNNNNNNNNNNNNNNNNNNNNNNNNNNNNNNNNNNNNNNNNNNNNNNNNNNNNNNNNNNNNNNNNNNNNNNNNNNNNNNNNNNNNNNNNNNNNNNNNNNNNNNNNNNNNNNNNNNNNNNNNNNNNNNNNNNNNNNNNNNNNNNNNNNNNNNNNNNNNNNCTTTCTGGTGCCCAGTTGTCTTGAGTGAGTTGAGCTGGGTACACCCTGTG	0	0	0	0	0	0	0	0	0	0	0	0	0	0	0	0	0	0	0	0	0	0	0	0	0	0	0	0	0	0	0	0	0	0	0	0	0	0	0	0	0	0	0	0	0	0
174	NODE_39121_length_320_cov_0.526316_g38402_i0	320	TGGTTAGGTGGGTGTCCATAAACTCATGTCATGTAGAGTCTCTTTTATTGNNNNNNNNNNNNNNNNNNNNNNNNNNNNNNNNNNNNNNNNNNNNNNNNNNNNNNNNNNNNNNNNNNNNNNNNNNNNNNNNNNNNNNNNNNNNNNNNNNNNNNNNNNNNNNNNNNNNNNNNNNNNNNNNNNNNNNNNNNNNNNNNNNNNNNNNNNNNNNNNNNNNNNNNNNNNNNNNNNNNNNNNNNNNNNNNNNNNNNNNNNNNNNNNNNNNNNNNNNNNTGTTTCACTTTCTTGTTTTCTGATTTTGAGCTATAGAGTCAAATGATATG	0	0	0	0	0	0	0	0	0	0	0	0	0	0	0	0.280546	0	0	0	0	0	0	0	0	0	0	0	0	0	0	0	0	0	0	0	0	0	0	0	0	0	0	0	0	0	0
175	NODE_39122_length_320_cov_0.526316_g38403_i0	320	TGGTCGCATTGTCCACTTTCACTTCTCCTTTTCTCCATTGTCATTGATGANNNNNNNNNNNNNNNNNNNNNNNNNNNNNNNNNNNNNNNNNNNNNNNNNNNNNNNNNNNNNNNNNNNNNNNNNNNNNNNNNNNNNNNNNNNNNNNNNNNNNNNNNNNNNNNNNNNNNNNNNNNNNNNNNNNNNNNNNNNNNNNNNNNNNNNNNNNNNNNNNNNNNNNNNNNNNNNNNNNNNNNNNNNNNNNNNNNNNNNNNNNNNNNNNNNNNNNNNNNNTTGTCCACTTTTACTTCTCATGTTCGCCGCTGTCATTGATTATGGTCACG	0	0	0	0	0	0	0	0	0	0	0	0	0	0	0	0.280546	0	0	0	0	0	0	0	0	0	0	0	0	0	0	0	0	0	0	0	0	0	0	0	0	0	0	0	0	0	0
176	NODE_39125_length_320_cov_0.526316_g38406_i0	320	ATTAATTACTCAAGGTAGGTAAAATTATCCTAGTTATTCATGTTGGAATGNNNNNNNNNNNNNNNNNNNNNNNNNNNNNNNNNNNNNNNNNNNNNNNNNNNNNNNNNNNNNNNNNNNNNNNNNNNNNNNNNNNNNNNNNNNNNNNNNNNNNNNNNNNNNNNNNNNNNNNNNNNNNNNNNNNNNNNNNNNNNNNNNNNNNNNNNNNNNNNNNNNNNNNNNNNNNNNNNNNNNNNNNNNNNNNNNNNNNNNNNNNNNNNNNNNNNNNNNNNNTGATTTTGGTAGGATTGCCTTTCTTGTCCATGTTTGGGAAGTATTTCTAT	0	0	0	0	0	0	0	0	0	0	0	0	0	0	0	0.280546	0	0	0	0	0	0	0	0	0	0	0	0	0	0	0	0	0	0	0	0	0	0	0	0	0	0	0	0	0	0
177	NODE_39126_length_320_cov_0.526316_g38407_i0	320	ATCGCTTCACAAACCGGTTCATCCCACCGACTGCTTGGGCATAGCACGGCNNNNNNNNNNNNNNNNNNNNNNNNNNNNNNNNNNNNNNNNNNNNNNNNNNNNNNNNNNNNNNNNNNNNNNNNNNNNNNNNNNNNNNNNNNNNNNNNNNNNNNNNNNNNNNNNNNNNNNNNNNNNNNNNNNNNNNNNNNNNNNNNNNNNNNNNNNNNNNNNNNNNNNNNNNNNNNNNNNNNNNNNNNNNNNNNNNNNNNNNNNNNNNNNNNNNNNNNNNNNTCAGCGGTCCTTGGTGTGGGGTCTCCGGATCCTTCAGCTCCGAAATATTT	0	0	0	0	0	0	0	0	0	0	0	0	0	0	0	0	0	0	0	0	0	0	0	0	0	0	0	0	0	0	0	0	0	0	0	0	0	0	0	0	0	0	0	0	0	0
178	NODE_39129_length_320_cov_0.526316_g38410_i0	320	CAAAAGTTATTCATAAACAAATATGCTAATTAGATAAATTTATATTTAGANNNNNNNNNNNNNNNNNNNNNNNNNNNNNNNNNNNNNNNNNNNNNNNNNNNNNNNNNNNNNNNNNNNNNNNNNNNNNNNNNNNNNNNNNNNNNNNNNNNNNNNNNNNNNNNNNNNNNNNNNNNNNNNNNNNNNNNNNNNNNNNNNNNNNNNNNNNNNNNNNNNNNNNNNNNNNNNNNNNNNNNNNNNNNNNNNNNNNNNNNNNNNNNNNNNNNNNNNNNNATGAAGAAAATGAAATAGACATAATGATAAGGAGTATTGAAAGTGATTAT	0	0	0	0	0	0	0	0	0	0	0	0	0	0	0	0.280546	0	0	0	0	0	0	0	0	0	0	0	0	0	0	0	0	0	0	0	0	0	0	0	0	0	0	0	0	0	0
179	NODE_39130_length_320_cov_0.526316_g38411_i0	320	TGGGGCGGATGCACTCCCTAAGGGGTACACCTTCTCTGATTCCCCCGTTTNNNNNNNNNNNNNNNNNNNNNNNNNNNNNNNNNNNNNNNNNNNNNNNNNNNNNNNNNNNNNNNNNNNNNNNNNNNNNNNNNNNNNNNNNNNNNNNNNNNNNNNNNNNNNNNNNNNNNNNNNNNNNNNNNNNNNNNNNNNNNNNNNNNNNNNNNNNNNNNNNNNNNNNNNNNNNNNNNNNNNNNNNNNNNNNNNNNNNNNNNNNNNNNNNNNNNNNNNNNNTGTGGACACAGCGTGACATTGGCGCTGTCTCCGGAGAAGCTGAATCGGCC	0	0	0	0	0	0	0	0	0	0	0	0	0	0	0	0	0	0	0	0	0	0	0	0	0	0	0	0	0	0	0	0	0	0	0	0	0	0	0	0	0	0	0	0	0	0
180	NODE_39131_length_320_cov_0.526316_g38412_i0	320	CTTCTGAATTGCCCTTCAAATGGGATCAACATAGTGCATGGTAATCTGATNNNNNNNNNNNNNNNNNNNNNNNNNNNNNNNNNNNNNNNNNNNNNNNNNNNNNNNNNNNNNNNNNNNNNNNNNNNNNNNNNNNNNNNNNNNNNNNNNNNNNNNNNNNNNNNNNNNNNNNNNNNNNNNNNNNNNNNNNNNNNNNNNNNNNNNNNNNNNNNNNNNNNNNNNNNNNNNNNNNNNNNNNNNNNNNNNNNNNNNNNNNNNNNNNNNNNNNNNNNNAAGATCTTCCTGATTTCAGTCCAAACAGAAATCGTTATAACTTTCGAATC	0	0	0	0	0	0	0	0	0	0	0	0	0	0	0	0	0	0	0	0	0	0	0	0	0	0	0	0	0	0	0	0	0	0	0	0	0	0.15819	0	0	0	0	0	0	0	0
181	NODE_39132_length_320_cov_0.526316_g38413_i0	320	GCAAGTATTACCAGCAGAGGGAGAGATAAGAGGCACAGCACACTTCAGATNNNNNNNNNNNNNNNNNNNNNNNNNNNNNNNNNNNNNNNNNNNNNNNNNNNNNNNNNNNNNNNNNNNNNNNNNNNNNNNNNNNNNNNNNNNNNNNNNNNNNNNNNNNNNNNNNNNNNNNNNNNNNNNNNNNNNNNNNNNNNNNNNNNNNNNNNNNNNNNNNNNNNNNNNNNNNNNNNNNNNNNNNNNNNNNNNNNNNNNNNNNNNNNNNNNNNNNNNNNNAAATGGAATCAATATAAAATTAAACTGACATACAGTTCCAGTTTTCTGAA	0	0	0	0	0	0	0	0	0	0	0	0	0	0	0	0	0	0	0	0	0	0	0	0	0	0	0	0	0	0	0	0	0	0	0	0	0	0.157874	0	0	0	0	0	0	0	0
182	NODE_39134_length_320_cov_0.526316_g38415_i0	320	CTCTATTTAAAGTAGTTATAGTTATTAAAGATTAGATTAGTTTTAGCACTNNNNNNNNNNNNNNNNNNNNNNNNNNNNNNNNNNNNNNNNNNNNNNNNNNNNNNNNNNNNNNNNNNNNNNNNNNNNNNNNNNNNNNNNNNNNNNNNNNNNNNNNNNNNNNNNNNNNNNNNNNNNNNNNNNNNNNNNNNNNNNNNNNNNNNNNNNNNNNNNNNNNNNNNNNNNNNNNNNNNNNNNNNNNNNNNNNNNNNNNNNNNNNNNNNNNNNNNNNNNTAGTTAGTAGGCGTTAATATTAAGGTAAATTACTATAGTAGCTAGAAACC	0	0	0	0	0	0	0	0	0	0	0	0	0	0	0	0	0	0	0	0	0	0	0	0	0	0	0	0	0	0	0	0	0	0	0	0	0	0	0	0	0	0	0	0	0	0
183	NODE_39143_length_320_cov_0.526316_g38424_i0	320	GGCCGCAGCCGATCAGTACGGCCAGGAGCGCCCGATCACGTTTTCCTTTGNNNNNNNNNNNNNNNNNNNNNNNNNNNNNNNNNNNNNNNNNNNNNNNNNNNNNNNNNNNNNNNNNNNNNNNNNNNNNNNNNNNNNNNNNNNNNNNNNNNNNNNNNNNNNNNNNNNNNNNNNNNNNNNNNNNNNNNNNNNNNNNNNNNNNNNNNNNNNNNNNNNNNNNNNNNNNNNNNNNNNNNNNNNNNNNNNNNNNNNNNNNNNNNNNNNNNNNNNNNNTGCGTTGATGAGTTGTTCCGCTTGGCGAACGGTCAGCCAGTTTCCAGTGC	0	0	0	0	0	0	0	0	0	0	0	0	0	0	0	0.280546	0	0	0	0	0	0	0	0	0	0	0	0	0	0	0	0	0	0	0	0	0	0	0	0	0	0	0	0	0	0
184	NODE_39144_length_320_cov_0.526316_g38425_i0	320	TTTTGGGTAGTTTGAGGTCGGTAAGGCAAATATATTTGACTTGTTTTTGGNNNNNNNNNNNNNNNNNNNNNNNNNNNNNNNNNNNNNNNNNNNNNNNNNNNNNNNNNNNNNNNNNNNNNNNNNNNNNNNNNNNNNNNNNNNNNNNNNNNNNNNNNNNNNNNNNNNNNNNNNNNNNNNNNNNNNNNNNNNNNNNNNNNNNNNNNNNNNNNNNNNNNNNNNNNNNNNNNNNNNNNNNNNNNNNNNNNNNNNNNNNNNNNNNNNNNNNNNNNNTCTAAAAGTCCTATGTTGACATAAGGCAAAGGGATTTGGAGTTTGAGAAT	0	0	0	0	0	0	0	0	0	0	0	0	0	0	0	0.280546	0	0	0	0	0	0	0	0	0	0	0	0	0	0	0	0	0	0	0	0	0	0	0	0	0	0	0	0	0	0
185	NODE_39147_length_320_cov_0.526316_g38428_i0	320	GATTGGCGTTCCTTCTATGGGTGGTGTCATCATCATCCTGGCTATCCTCGNNNNNNNNNNNNNNNNNNNNNNNNNNNNNNNNNNNNNNNNNNNNNNNNNNNNNNNNNNNNNNNNNNNNNNNNNNNNNNNNNNNNNNNNNNNNNNNNNNNNNNNNNNNNNNNNNNNNNNNNNNNNNNNNNNNNNNNNNNNNNNNNNNNNNNNNNNNNNNNNNNNNNNNNNNNNNNNNNNNNNNNNNNNNNNNNNNNNNNNNNNNNNNNNNNNNNNNNNNNNTGCGCAACATCTATCTGATTCTGATGATCATCACCACCGTATGGCTCGGC	0	0	0	0	0	0	0	0	0	0	0	0	0	0	0	0	0	0	0	0	0	0	0	0	0	0	0	0	0	0	0	0	0	0	0	0	0	0.15819	0	0	0	0	0	0	0	0
186	NODE_39150_length_320_cov_0.526316_g38431_i0	320	AGGATCTTTTCTTCCTACAAATAATACCATAACATCCATAAGTAAAGAGTNNNNNNNNNNNNNNNNNNNNNNNNNNNNNNNNNNNNNNNNNNNNNNNNNNNNNNNNNNNNNNNNNNNNNNNNNNNNNNNNNNNNNNNNNNNNNNNNNNNNNNNNNNNNNNNNNNNNNNNNNNNNNNNNNNNNNNNNNNNNNNNNNNNNNNNNNNNNNNNNNNNNNNNNNNNNNNNNNNNNNNNNNNNNNNNNNNNNNNNNNNNNNNNNNNNNNNNNNNNNGTAATATTAGTTTTTCAATATGTAGGTCATTTTACTAAAGCATATTAAAT	0	0	0	0	0	0	0	0	0	0	0	0	0	0	0	0.280546	0	0	0	0	0	0	0	0	0	0	0	0	0	0	0	0	0	0	0	0	0	0	0	0	0	0	0	0	0	0
187	NODE_39152_length_320_cov_0.526316_g38433_i0	320	AAGTCTAATGGATGCCATAAGTAGGTGCCAACATAGACAATGGTACAACANNNNNNNNNNNNNNNNNNNNNNNNNNNNNNNNNNNNNNNNNNNNNNNNNNNNNNNNNNNNNNNNNNNNNNNNNNNNNNNNNNNNNNNNNNNNNNNNNNNNNNNNNNNNNNNNNNNNNNNNNNNNNNNNNNNNNNNNNNNNNNNNNNNNNNNNNNNNNNNNNNNNNNNNNNNNNNNNNNNNNNNNNNNNNNNNNNNNNNNNNNNNNNNNNNNNNNNNNNNNTACTCCGTAGAACCTAATCAGGCCTCACATCCTTCACACGCTCAACCTCG	0	0	0	0	0	0	0	0	0	0	0	0	0	0	0	0.280546	0	0	0	0	0	0	0	0	0	0	0	0	0	0	0	0	0	0	0	0	0	0	0	0	0	0	0	0	0	0
188	NODE_39155_length_320_cov_0.526316_g38436_i0	320	CATCCTGCAACCGTGCGGCAACGGTGATTTGCCCATCTGCGGGTGTGAACNNNNNNNNNNNNNNNNNNNNNNNNNNNNNNNNNNNNNNNNNNNNNNNNNNNNNNNNNNNNNNNNNNNNNNNNNNNNNNNNNNNNNNNNNNNNNNNNNNNNNNNNNNNNNNNNNNNNNNNNNNNNNNNNNNNNNNNNNNNNNNNNNNNNNNNNNNNNNNNNNNNNNNNNNNNNNNNNNNNNNNNNNNNNNNNNNNNNNNNNNNNNNNNNNNNNNNNNNNNNGCACCATGTTGAGGTCGGCCCGCACGGCTCCAAGGGGCGGAATCTGGCTG	0	0	0	0	0	0	0	0	0	0	0	0	0	0	0	0.279984	0	0	0	0	0	0	0	0	0	0	0	0	0	0	0	0	0	0	0	0	0	0	0	0	0	0	0	0	0	0
189	NODE_39156_length_320_cov_0.526316_g38437_i0	320	TCAATGGCGCTTGGATTGGTGTTGTTCTGCATCGCGTTCGCGCTGCGTTCNNNNNNNNNNNNNNNNNNNNNNNNNNNNNNNNNNNNNNNNNNNNNNNNNNNNNNNNNNNNNNNNNNNNNNNNNNNNNNNNNNNNNNNNNNNNNNNNNNNNNNNNNNNNNNNNNNNNNNNNNNNNNNNNNNNNNNNNNNNNNNNNNNNNNNNNNNNNNNNNNNNNNNNNNNNNNNNNNNNNNNNNNNNNNNNNNNNNNNNNNNNNNNNNNNNNNNNNNNNNGGCAGAAATACATGCCTGAACTTCCGCTAGCCCCTATGCTTAAAAGACAC	0	0	0	0	0	0	0	0	0	0	0	0	0	0	0	0.280546	0	0	0	0	0	0	0	0	0	0	0	0	0	0	0	0	0	0	0	0	0	0	0	0	0	0	0	0	0	0
190	NODE_39165_length_320_cov_0.526316_g38446_i0	320	TTCTTAATTTAAAGCCAACAACGCAACAAATTAAAATAATAGGGAAAGTCNNNNNNNNNNNNNNNNNNNNNNNNNNNNNNNNNNNNNNNNNNNNNNNNNNNNNNNNNNNNNNNNNNNNNNNNNNNNNNNNNNNNNNNNNNNNNNNNNNNNNNNNNNNNNNNNNNNNNNNNNNNNNNNNNNNNNNNNNNNNNNNNNNNNNNNNNNNNNNNNNNNNNNNNNNNNNNNNNNNNNNNNNNNNNNNNNNNNNNNNNNNNNNNNNNNNNNNNNNNNAAAAGAATTGCACTTGTAACTTTAAGAAGTTCTTAGGACTTAGTGAGTGG	0	0	0	0	0	0	0	0	0	0	0	0	0	0	0	0.280546	0	0	0	0	0	0	0	0	0	0	0	0	0	0	0	0	0	0	0	0	0	0	0	0	0	0	0	0	0	0
191	NODE_39166_length_320_cov_0.526316_g38447_i0	320	TGGACAGCCAGTTCGAGATCCGGGGGATCTGACGTGGCACTCAAGAAGAGNNNNNNNNNNNNNNNNNNNNNNNNNNNNNNNNNNNNNNNNNNNNNNNNNNNNNNNNNNNNNNNNNNNNNNNNNNNNNNNNNNNNNNNNNNNNNNNNNNNNNNNNNNNNNNNNNNNNNNNNNNNNNNNNNNNNNNNNNNNNNNNNNNNNNNNNNNNNNNNNNNNNNNNNNNNNNNNNNNNNNNNNNNNNNNNNNNNNNNNNNNNNNNNNNNNNNNNNNNNNGTCAGCGTCGTTCGAGAGGGGTCGGGGGATCTCGACGGTAGCGATGAGGT	0	0	0	0	0	0	0	0	0	0	0	0	0	0	0	0	0	0	0	0	0	0	0	0	0	0	0	0	0	0	0	0	0	0	0	0	0	0.15819	0	0	0	0	0	0	0	0
192	NODE_39167_length_320_cov_0.526316_g38448_i0	320	AGCCAGGCGGAGGAGGCTGTAGGAGGATATGCCGTTTCGTTCAGGTTGTGNNNNNNNNNNNNNNNNNNNNNNNNNNNNNNNNNNNNNNNNNNNNNNNNNNNNNNNNNNNNNNNNNNNNNNNNNNNNNNNNNNNNNNNNNNNNNNNNNNNNNNNNNNNNNNNNNNNNNNNNNNNNNNNNNNNNNNNNNNNNNNNNNNNNNNNNNNNNNNNNNNNNNNNNNNNNNNNNNNNNNNNNNNNNNNNNNNNNNNNNNNNNNNNNNNNNNNNNNNNNGTTCATGTTCAGAACAAGGCACTCTCAGTATCAGACAGCCTGTCTTGATC	0	0	0	0	0	0	0	0	0	0	0	0	0	0	0	0	0	0	0	0	0	0	0	0	0	0	0	0	0	0	0	0	0	0	0	0	0	0.15819	0	0	0	0	0	0	0	0
193	NODE_39168_length_320_cov_0.526316_g38449_i0	320	CCTTATTCTTATTTCATCTATCTATTGTAAAAGAAACCAAAGTATACTTTNNNNNNNNNNNNNNNNNNNNNNNNNNNNNNNNNNNNNNNNNNNNNNNNNNNNNNNNNNNNNNNNNNNNNNNNNNNNNNNNNNNNNNNNNNNNNNNNNNNNNNNNNNNNNNNNNNNNNNNNNNNNNNNNNNNNNNNNNNNNNNNNNNNNNNNNNNNNNNNNNNNNNNNNNNNNNNNNNNNNNNNNNNNNNNNNNNNNNNNNNNNNNNNNNNNNNNNNNNNNAGCAGTTATATATAAACACTTTTCCCTATAACAAACATGCATCTACACAG	0	0	0	0	0	0	0	0	0	0	0	0	0	0	0	0	0	0	0	0	0	0	0	0	0	0	0	0	0	0	0	0	0	0	0	0	0	0.15819	0	0	0	0	0	0	0	0
194	NODE_39171_length_320_cov_0.526316_g38452_i0	320	ATAAAATGAACGACGCCAACCAATCGTAACGCTTGGATTCGCTACAGATCNNNNNNNNNNNNNNNNNNNNNNNNNNNNNNNNNNNNNNNNNNNNNNNNNNNNNNNNNNNNNNNNNNNNNNNNNNNNNNNNNNNNNNNNNNNNNNNNNNNNNNNNNNNNNNNNNNNNNNNNNNNNNNNNNNNNNNNNNNNNNNNNNNNNNNNNNNNNNNNNNNNNNNNNNNNNNNNNNNNNNNNNNNNNNNNNNNNNNNNNNNNNNNNNNNNNNNNNNNNNCTAAATCTTACTTTTCATATAGAAGAAGATAAAACTGTAGAATTTAATTT	0	0	0	0	0	0	0	0	0	0	0	0	0	0	0	0.280546	0	0	0	0	0	0	0	0	0	0	0	0	0	0	0	0	0	0	0	0	0	0	0	0	0	0	0	0	0	0
195	NODE_39172_length_320_cov_0.526316_g38453_i0	320	ACCAATTGATGTGCTGGCATATCTGTATTATAATGTTGGCAATCCTTTTCNNNNNNNNNNNNNNNNNNNNNNNNNNNNNNNNNNNNNNNNNNNNNNNNNNNNNNNNNNNNNNNNNNNNNNNNNNNNNNNNNNNNNNNNNNNNNNNNNNNNNNNNNNNNNNNNNNNNNNNNNNNNNNNNNNNNNNNNNNNNNNNNNNNNNNNNNNNNNNNNNNNNNNNNNNNNNNNNNNNNNNNNNNNNNNNNNNNNNNNNNNNNNNNNNNNNNNNNNNNNTCTTGAAATACGCACTTATCATAAGAGATCAAAAAAGGATTCTTTCTTAC	0	0	0	0	0	0	0	0	0	0	0	0	0	0	0	0.280546	0	0	0	0	0	0	0	0	0	0	0	0	0	0	0	0	0	0	0	0	0	0	0	0	0	0	0	0	0	0
196	NODE_39175_length_320_cov_0.526316_g38456_i0	320	AGTAGCACGCCACAAGCAACGTAGCATCACCGTCTAGTTGCATCTCCATTNNNNNNNNNNNNNNNNNNNNNNNNNNNNNNNNNNNNNNNNNNNNNNNNNNNNNNNNNNNNNNNNNNNNNNNNNNNNNNNNNNNNNNNNNNNNNNNNNNNNNNNNNNNNNNNNNNNNNNNNNNNNNNNNNNNNNNNNNNNNNNNNNNNNNNNNNNNNNNNNNNNNNNNNNNNNNNNNNNNNNNNNNNNNNNNNNNNNNNNNNNNNNNNNNNNNNNNNNNNNTTTGTCCCGTCCATCTTCATCATGTTCTCCCTATCGTCTCCTGTCTCCAA	0	0	0	0	0	0	0	0	0	0	0	0	0	0	0	0.280546	0	0	0	0	0	0	0	0	0	0	0	0	0	0	0	0	0	0	0	0	0	0	0	0	0	0	0	0	0	0
197	NODE_39180_length_320_cov_0.526316_g38461_i0	320	TGCCTCCTATCCGGCGCGCTAATGGAAGTCCTGAAGAGGGTTAAGATTTANNNNNNNNNNNNNNNNNNNNNNNNNNNNNNNNNNNNNNNNNNNNNNNNNNNNNNNNNNNNNNNNNNNNNNNNNNNNNNNNNNNNNNNNNNNNNNNNNNNNNNNNNNNNNNNNNNNNNNNNNNNNNNNNNNNNNNNNNNNNNNNNNNNNNNNNNNNNNNNNNNNNNNNNNNNNNNNNNNNNNNNNNNNNNNNNNNNNNNNNNNNNNNNNNNNNNNNNNNNNTAAGCAAGGCGAGGCAGCAAGGAGACTTGCTGCGATGCGGGATGTCAACA	0	0	0	0	0	0	0	0	0	0	0	0	0	0	0	0	0	0	0	0	0	0	0	0	0	0	0	0	0	0	0	0	0	0	0	0	0	0	0	0	0	0	0	0	0	0
198	NODE_39184_length_320_cov_0.526316_g38465_i0	320	GGGAGCCTGACGGGTCGCGGTGTGGCGTGAGGGACGCGACGGTGAGGCGTNNNNNNNNNNNNNNNNNNNNNNNNNNNNNNNNNNNNNNNNNNNNNNNNNNNNNNNNNNNNNNNNNNNNNNNNNNNNNNNNNNNNNNNNNNNNNNNNNNNNNNNNNNNNNNNNNNNNNNNNNNNNNNNNNNNNNNNNNNNNNNNNNNNNNNNNNNNNNNNNNNNNNNNNNNNNNNNNNNNNNNNNNNNNNNNNNNNNNNNNNNNNNNNNNNNNNNNNNNNNGCGGGCGCACGCGGTGATGGCGCGCCATCCGAGCATCGTCGCGGGCTGCT	0	0	0	0	0	0	0	0	0	0	0	0	0	0	0	0	0	0	0	0	0	0	0	0	0	0	0	0	0	0	0	0	0	0	0	0	0	0.15819	0	0	0	0	0	0	0	0
199	NODE_39187_length_320_cov_0.526316_g38468_i0	320	CTCATTGTAACAACTCAATTCTCATGAATCAATATACTCAATAATCCAATNNNNNNNNNNNNNNNNNNNNNNNNNNNNNNNNNNNNNNNNNNNNNNNNNNNNNNNNNNNNNNNNNNNNNNNNNNNNNNNNNNNNNNNNNNNNNNNNNNNNNNNNNNNNNNNNNNNNNNNNNNNNNNNNNNNNNNNNNNNNNNNNNNNNNNNNNNNNNNNNNNNNNNNNNNNNNNNNNNNNNNNNNNNNNNNNNNNNNNNNNNNNNNNNNNNNNNNNNNNNGAAGCTTAAAGTTTGACACATATCTTGAAAGCACTTGAAATACCAAATTA	0	0	0	0	0	0	0	0	0	0	0	0	0	0	0	0.279984	0	0	0	0	0	0	0	0	0	0	0	0	0	0	0	0	0	0	0	0	0	0	0	0	0	0	0	0	0	0
200	NODE_39190_length_320_cov_0.526316_g38471_i0	320	CTGAGCTGAACCGATTCTTACTACCTCATATATTCAACTAATACCTTAATNNNNNNNNNNNNNNNNNNNNNNNNNNNNNNNNNNNNNNNNNNNNNNNNNNNNNNNNNNNNNNNNNNNNNNNNNNNNNNNNNNNNNNNNNNNNNNNNNNNNNNNNNNNNNNNNNNNNNNNNNNNNNNNNNNNNNNNNNNNNNNNNNNNNNNNNNNNNNNNNNNNNNNNNNNNNNNNNNNNNNNNNNNNNNNNNNNNNNNNNNNNNNNNNNNNNNNNNNNNNTAATGTCAACTATAATAGATGACAACGCCTATTTGATAATTTACAACAGA	0	0	0	0	0	0	0	0	0	0	0	0	0	0	0	0.280546	0	0	0	0	0	0	0	0	0	0	0	0	0	0	0	0	0	0	0	0	0	0	0	0	0	0	0	0	0	0
201	NODE_39191_length_320_cov_0.526316_g38472_i0	320	TAGTGAGGATCTCGAACCTCAGTCAGTCACAGAATATCGATAAAGAAATGNNNNNNNNNNNNNNNNNNNNNNNNNNNNNNNNNNNNNNNNNNNNNNNNNNNNNNNNNNNNNNNNNNNNNNNNNNNNNNNNNNNNNNNNNNNNNNNNNNNNNNNNNNNNNNNNNNNNNNNNNNNNNNNNNNNNNNNNNNNNNNNNNNNNNNNNNNNNNNNNNNNNNNNNNNNNNNNNNNNNNNNNNNNNNNNNNNNNNNNNNNNNNNNNNNNNNNNNNNNNATCTGAGTTGAATTCACTTGTCAAACGTGAGGTTTTTGGACCCACTATTC	0	0	0	0	0	0	0	0	0	0	0	0	0	0	0	0.280546	0	0	0	0	0	0	0	0	0	0	0	0	0	0	0	0	0	0	0	0	0	0	0	0	0	0	0	0	0	0
202	NODE_39196_length_320_cov_0.526316_g38477_i0	320	GAATCACAAAAAGAAAAACTTGAAGTAAAGTAAAGACGAAAGATTTCCAGNNNNNNNNNNNNNNNNNNNNNNNNNNNNNNNNNNNNNNNNNNNNNNNNNNNNNNNNNNNNNNNNNNNNNNNNNNNNNNNNNNNNNNNNNNNNNNNNNNNNNNNNNNNNNNNNNNNNNNNNNNNNNNNNNNNNNNNNNNNNNNNNNNNNNNNNNNNNNNNNNNNNNNNNNNNNNNNNNNNNNNNNNNNNNNNNNNNNNNNNNNNNNNNNNNNNNNNNNNNNGAATGACCGAAATTTCACCTTCCATGTCAAGTGAGAGTATCTGGAGAAAA	0	0	0	0	0	0	0	0	0	0	0	0	0	0	0	0.280546	0	0	0	0	0	0	0	0	0	0	0	0	0	0	0	0	0	0	0	0	0	0	0	0	0	0	0	0	0	0
203	NODE_39197_length_320_cov_0.526316_g38478_i0	320	CGTATTTTCGAAATCACCCAAGACCATTATCAAGCATCCCTATTTCTAGGNNNNNNNNNNNNNNNNNNNNNNNNNNNNNNNNNNNNNNNNNNNNNNNNNNNNNNNNNNNNNNNNNNNNNNNNNNNNNNNNNNNNNNNNNNNNNNNNNNNNNNNNNNNNNNNNNNNNNNNNNNNNNNNNNNNNNNNNNNNNNNNNNNNNNNNNNNNNNNNNNNNNNNNNNNNNNNNNNNNNNNNNNNNNNNNNNNNNNNNNNNNNNNNNNNNNNNNNNNNNTACACTTATTTCTAAGATTGCAAAAGATAGCAAACCATTGGCTCAATTTT	0	0	0	0	0	0	0	0	0	0	0	0	0	0	0	0.280546	0	0	0	0	0	0	0	0	0	0	0	0	0	0	0	0	0	0	0	0	0	0	0	0	0	0	0	0	0	0
204	NODE_39199_length_320_cov_0.526316_g38480_i0	320	ACTTGGGTTAGCTTGAGCGTGGATTCACTTGATTTGACAACCCGGCAAAGNNNNNNNNNNNNNNNNNNNNNNNNNNNNNNNNNNNNNNNNNNNNNNNNNNNNNNNNNNNNNNNNNNNNNNNNNNNNNNNNNNNNNNNNNNNNNNNNNNNNNNNNNNNNNNNNNNNNNNNNNNNNNNNNNNNNNNNNNNNNNNNNNNNNNNNNNNNNNNNNNNNNNNNNNNNNNNNNNNNNNNNNNNNNNNNNNNNNNNNNNNNNNNNNNNNNNNNNNNNNTAAGAGTGTGGTATTTCAATTACAAGCTTAGGTGGGTCTTGGTGTTTGAT	0	0	0	0	0	0	0	0	0	0	0	0	0	0	0	0.280546	0	0	0	0	0	0	0	0	0	0	0	0	0	0	0	0	0	0	0	0	0	0	0	0	0	0	0	0	0	0
205	NODE_39200_length_320_cov_0.526316_g38481_i0	320	GTCTTGCTTCGCTCTGCAAGAGCTTGCACGATGGAATGCTGAAGCCTTTCNNNNNNNNNNNNNNNNNNNNNNNNNNNNNNNNNNNNNNNNNNNNNNNNNNNNNNNNNNNNNNNNNNNNNNNNNNNNNNNNNNNNNNNNNNNNNNNNNNNNNNNNNNNNNNNNNNNNNNNNNNNNNNNNNNNNNNNNNNNNNNNNNNNNNNNNNNNNNNNNNNNNNNNNNNNNNNNNNNNNNNNNNNNNNNNNNNNNNNNNNNNNNNNNNNNNNNNNNNNNTAGCGGCCAATACGCTCCATAGTTGTTCGCGGTAAGTGACCAGCTTGAAT	0	0	0	0	0	0	0	0	0	0	0	0	0	0	0	0	0	0	0	0	0	0	0	0	0	0	0	0	0	0	0	0	0	0	0	0	0	0.15819	0	0	0	0	0	0	0	0
206	NODE_39201_length_320_cov_0.526316_g38482_i0	320	AACTGCTGGGCGGCGGTTGGATTCACGAATAGATCGCAGCCGCTCAGCGANNNNNNNNNNNNNNNNNNNNNNNNNNNNNNNNNNNNNNNNNNNNNNNNNNNNNNNNNNNNNNNNNNNNNNNNNNNNNNNNNNNNNNNNNNNNNNNNNNNNNNNNNNNNNNNNNNNNNNNNNNNNNNNNNNNNNNNNNNNNNNNNNNNNNNNNNNNNNNNNNNNNNNNNNNNNNNNNNNNNNNNNNNNNNNNNNNNNNNNNNNNNNNNNNNNNNNNNNNNNCAGCGAAGACTTTTCACCATAGGGATTCAGTTCCGCAGCAATGAGGTCTG	0	0	0	0	0	0	0	0	0	0	0	0	0	0	0	0	0	0	0	0	0	0	0	0	0	0	0	0	0	0	0	0	0	0	0	0	0	0.15819	0	0	0	0	0	0	0	0
207	NODE_39203_length_320_cov_0.526316_g38484_i0	320	AGGTATCACGCTTGCCCACGGTTCACCTCGCGCTGTTCACGCCCGTCGAGNNNNNNNNNNNNNNNNNNNNNNNNNNNNNNNNNNNNNNNNNNNNNNNNNNNNNNNNNNNNNNNNNNNNNNNNNNNNNNNNNNNNNNNNNNNNNNNNNNNNNNNNNNNNNNNNNNNNNNNNNNNNNNNNNNNNNNNNNNNNNNNNNNNNNNNNNNNNNNNNNNNNNNNNNNNNNNNNNNNNNNNNNNNNNNNNNNNNNNNNNNNNNNNNNNNNNNNNNNNNAGCGAGTGGGCCGCACACGCAGTCGTCGCGGTCGTCGTGCTGGATGATGT	0	0	0	0	0	0	0	0	0	0	0	0	0	0	0	0	0	0	0	0	0	0	0	0	0	0	0	0	0	0	0	0	0	0	0	0	0	0.15819	0	0	0	0	0	0	0	0
208	NODE_39204_length_320_cov_0.526316_g38485_i0	320	AGTGCTTTTGGCATATGGCTTTATCTTGTACATTAGGAATGCAGTCTGCANNNNNNNNNNNNNNNNNNNNNNNNNNNNNNNNNNNNNNNNNNNNNNNNNNNNNNNNNNNNNNNNNNNNNNNNNNNNNNNNNNNNNNNNNNNNNNNNNNNNNNNNNNNNNNNNNNNNNNNNNNNNNNNNNNNNNNNNNNNNNNNNNNNNNNNNNNNNNNNNNNNNNNNNNNNNNNNNNNNNNNNNNNNNNNNNNNNNNNNNNNNNNNNNNNNNNNNNNNNNTTGTATTAGTGAGGTGAGTGATAGGTATACTTAAAGGCTATGATTTTACC	0	0	0	0	0	0	0	0	0	0	0	0	0	0	0	0	0	0	0	0	0	0	0	0	0	0	0	0	0	0	0	0	0	0	0	0	0	0.15819	0	0	0	0	0	0	0	0
209	NODE_39206_length_320_cov_0.526316_g38487_i0	320	TAAGGAATAAGTACGCTAGCAGGATCAAAAATTTATTAATTTCAGGGAATNNNNNNNNNNNNNNNNNNNNNNNNNNNNNNNNNNNNNNNNNNNNNNNNNNNNNNNNNNNNNNNNNNNNNNNNNNNNNNNNNNNNNNNNNNNNNNNNNNNNNNNNNNNNNNNNNNNNNNNNNNNNNNNNNNNNNNNNNNNNNNNNNNNNNNNNNNNNNNNNNNNNNNNNNNNNNNNNNNNNNNNNNNNNNNNNNNNNNNNNNNNNNNNNNNNNNNNNNNNNATTGTCCTCAACTAGATCCTGTCATAGATTTATTCTGTTCGTAAATAAGA	0	0	0	0	0	0	0	0	0	0	0	0	0	0	0	0	0	0	0	0	0	0	0	0	0	0	0	0	0	0	0	0	0	0	0	0	0	0.15819	0	0	0	0	0	0	0	0
210	NODE_39208_length_320_cov_0.526316_g38489_i0	320	CCTTCAGTTGGGTCTGGTTTTCATGACCTCAGAACCTTTTTGGATCAGCCNNNNNNNNNNNNNNNNNNNNNNNNNNNNNNNNNNNNNNNNNNNNNNNNNNNNNNNNNNNNNNNNNNNNNNNNNNNNNNNNNNNNNNNNNNNNNNNNNNNNNNNNNNNNNNNNNNNNNNNNNNNNNNNNNNNNNNNNNNNNNNNNNNNNNNNNNNNNNNNNNNNNNNNNNNNNNNNNNNNNNNNNNNNNNNNNNNNNNNNNNNNNNNNNNNNNNNNNNNNNGGCTTCCAACAGTGTTCTGTGTTCACTGCCACTCCATGGCTTGGCTTCAG	0	0	0	0	0	0	0	0	0	0	0	0	0	0	0	0	0	0	0	0	0	0	0	0	0	0	0	0	0	0	0	0	0	0	0	0	0	0	0	0	0	0	0	0	0	0
211	NODE_39214_length_320_cov_0.526316_g38495_i0	320	TGGGTCTACTGAATCACTCAGAAGCATTCGTATCTACTTGTATATCAATTNNNNNNNNNNNNNNNNNNNNNNNNNNNNNNNNNNNNNNNNNNNNNNNNNNNNNNNNNNNNNNNNNNNNNNNNNNNNNNNNNNNNNNNNNNNNNNNNNNNNNNNNNNNNNNNNNNNNNNNNNNNNNNNNNNNNNNNNNNNNNNNNNNNNNNNNNNNNNNNNNNNNNNNNNNNNNNNNNNNNNNNNNNNNNNNNNNNNNNNNNNNNNNNNNNNNNNNNNNNNTGGACGTTAAGGTAAATTGTTGTTCAAATCTGTCATGACACTAATTTGTA	0	0	0	0	0	0	0	0	0	0	0	0	0	0	0	0	0	0	0	0	0	0	0	0	0	0	0	0	0	0	0	0	0	0	0	0	0	0.15819	0	0	0	0	0	0	0	0
212	NODE_39222_length_320_cov_0.526316_g38503_i0	320	AAGTGATTCTCACCTGAATACAAGTTTTATGATCATTATCCTAGTCTATGNNNNNNNNNNNNNNNNNNNNNNNNNNNNNNNNNNNNNNNNNNNNNNNNNNNNNNNNNNNNNNNNNNNNNNNNNNNNNNNNNNNNNNNNNNNNNNNNNNNNNNNNNNNNNNNNNNNNNNNNNNNNNNNNNNNNNNNNNNNNNNNNNNNNNNNNNNNNNNNNNNNNNNNNNNNNNNNNNNNNNNNNNNNNNNNNNNNNNNNNNNNNNNNNNNNNNNNNNNNNGACCAATTGATTCATCCAAAGTTTGACATCTGATTCTACAAGGATCAACT	0	0	0	0	0	0	0	0	0	0	0	0	0	0	0	0.280546	0	0	0	0	0	0	0	0	0	0	0	0	0	0	0	0	0	0	0	0	0	0	0	0	0	0	0	0	0	0
213	NODE_39223_length_320_cov_0.526316_g38504_i0	320	AGAGCAGTTGCAGACACGTTATGACCCTTTGATTTCAGCACACTATTCCCNNNNNNNNNNNNNNNNNNNNNNNNNNNNNNNNNNNNNNNNNNNNNNNNNNNNNNNNNNNNNNNNNNNNNNNNNNNNNNNNNNNNNNNNNNNNNNNNNNNNNNNNNNNNNNNNNNNNNNNNNNNNNNNNNNNNNNNNNNNNNNNNNNNNNNNNNNNNNNNNNNNNNNNNNNNNNNNNNNNNNNNNNNNNNNNNNNNNNNNNNNNNNNNNNNNNNNNNNNNNTTGCACTGCACAACAGACTTTCCTTTATTTGATCATCTGGCAAGATGTAG	0	0	0	0	0	0	0	0	0	0	0	0	0	0	0	0	0	0	0	0	0	0	0	0	0	0	0	0	0	0	0	0	0	0	0	0	0	0.15819	0	0	0	0	0	0	0	0
214	NODE_39229_length_320_cov_0.526316_g38510_i0	320	TGCTGCCACATTGATGGAAGCATCCATTACGGCACATGATGCTTCGTGTGNNNNNNNNNNNNNNNNNNNNNNNNNNNNNNNNNNNNNNNNNNNNNNNNNNNNNNNNNNNNNNNNNNNNNNNNNNNNNNNNNNNNNNNNNNNNNNNNNNNNNNNNNNNNNNNNNNNNNNNNNNNNNNNNNNNNNNNNNNNNNNNNNNNNNNNNNNNNNNNNNNNNNNNNNNNNNNNNNNNNNNNNNNNNNNNNNNNNNNNNNNNNNNNNNNNNNNNNNNNNGGACTCTATTCAAATCATACGCAATTTTGAAAAAGAAAATCGTCGCCAAG	0	0	0	0	0	0	0	0	0	0	0	0.486829	0	0	0	0	0	0	0	0	0	0	0	0	0	0	0	0	0	0	0	0	0	0	0	0	0	0	0	0	0	0	0	0	0	0
215	NODE_39233_length_320_cov_0.526316_g38514_i0	320	ACCTCCTTAAGACTTATAATAAGGTCAAGAACTTTGATGTAAGAGATAATNNNNNNNNNNNNNNNNNNNNNNNNNNNNNNNNNNNNNNNNNNNNNNNNNNNNNNNNNNNNNNNNNNNNNNNNNNNNNNNNNNNNNNNNNNNNNNNNNNNNNNNNNNNNNNNNNNNNNNNNNNNNNNNNNNNNNNNNNNNNNNNNNNNNNNNNNNNNNNNNNNNNNNNNNNNNNNNNNNNNNNNNNNNNNNNNNNNNNNNNNNNNNNNNNNNNNNNNNNNNGGAGTAGAACGTAGGATAACTAGTTTATGAAATGAAAGTTCACAAATATT	0	0	0	0	0	0	0	0	0	0	0	0	0	0	0	0.280546	0	0	0	0	0	0	0	0	0	0	0	0	0	0	0	0	0	0	0	0	0	0	0	0	0	0	0	0	0	0
216	NODE_39234_length_320_cov_0.526316_g38515_i0	320	TGAAGATGATCAAAAGACTATCTATCTAGGTAATGAGCGTAGTATATATANNNNNNNNNNNNNNNNNNNNNNNNNNNNNNNNNNNNNNNNNNNNNNNNNNNNNNNNNNNNNNNNNNNNNNNNNNNNNNNNNNNNNNNNNNNNNNNNNNNNNNNNNNNNNNNNNNNNNNNNNNNNNNNNNNNNNNNNNNNNNNNNNNNNNNNNNNNNNNNNNNNNNNNNNNNNNNNNNNNNNNNNNNNNNNNNNNNNNNNNNNNNNNNNNNNNNNNNNNNNTATCCTGTTGGTGGTCACTTCCCTCCTTAGCGAGGTATCGTTCCTTCCTT	0	0	0	0	0	0	0	0	0	0	0	0	0.127179	0	0	0	0	0	0	0	0	0	0	0	0	0	0	0	0	0	0	0	0	0	0	0	0	0	0	0	0	0	0	0	0	0
217	NODE_39236_length_320_cov_0.526316_g38517_i0	320	CAAAGGATAGCTTCTGTAATAGCCTCCGTGACATGGAGGCTGGTCTCTACNNNNNNNNNNNNNNNNNNNNNNNNNNNNNNNNNNNNNNNNNNNNNNNNNNNNNNNNNNNNNNNNNNNNNNNNNNNNNNNNNNNNNNNNNNNNNNNNNNNNNNNNNNNNNNNNNNNNNNNNNNNNNNNNNNNNNNNNNNNNNNNNNNNNNNNNNNNNNNNNNNNNNNNNNNNNNNNNNNNNNNNNNNNNNNNNNNNNNNNNNNNNNNNNNNNNNNNNNNNNTATGCCACGAACATATATAAAAATTTGACTGTTTTATTCTATTTAAATTG	0	0	0	0	0	0	0	0	0	0	0	0	0	0	0	0.279984	0	0	0	0	0	0	0	0	0	0	0	0	0	0	0	0	0	0	0	0	0	0	0	0	0	0	0	0	0	0
218	NODE_39242_length_320_cov_0.526316_g38523_i0	320	TTATGGTACATGCTACTGGATATTCGTGAAGAAGGTTTCTCACTAATAATNNNNNNNNNNNNNNNNNNNNNNNNNNNNNNNNNNNNNNNNNNNNNNNNNNNNNNNNNNNNNNNNNNNNNNNNNNNNNNNNNNNNNNNNNNNNNNNNNNNNNNNNNNNNNNNNNNNNNNNNNNNNNNNNNNNNNNNNNNNNNNNNNNNNNNNNNNNNNNNNNNNNNNNNNNNNNNNNNNNNNNNNNNNNNNNNNNNNNNNNNNNNNNNNNNNNNNNNNNNNGGTAAGTCGTTTCGGTGGGAAATTGCTTGGTCAATTCCTCTGGGATATTT	0	0	0	0	0	0	0	0	0	0	0	0	0	0	0	0	0	0	0	0	0	0	0	0	0	0	0	0	0	0	0	0	0	0	0	0	0	0.15819	0	0	0	0	0	0	0	0
219	NODE_39245_length_320_cov_0.526316_g38526_i0	320	GTATGAGAATTGCAAATGAGTTGATCTCTCAGTAGGCGGAAAGTATAGAANNNNNNNNNNNNNNNNNNNNNNNNNNNNNNNNNNNNNNNNNNNNNNNNNNNNNNNNNNNNNNNNNNNNNNNNNNNNNNNNNNNNNNNNNNNNNNNNNNNNNNNNNNNNNNNNNNNNNNNNNNNNNNNNNNNNNNNNNNNNNNNNNNNNNNNNNNNNNNNNNNNNNNNNNNNNNNNNNNNNNNNNNNNNNNNNNNNNNNNNNNNNNNNNNNNNNNNNNNNNTGCTTTAATAGGTTACAAAATGATTTTTATGAAAATATATGCATTAATTG	0	0	0	0	0	0	0	0	0	0	0	0	0	0	0	0	0	0	0	0	0	0	0	0	0	0	0	0	0	0	0	0	0	0	0	0	0	0	0	0.143584	0	0	0	0	0	0
220	NODE_39246_length_320_cov_0.526316_g38527_i0	320	CGCTGCGAGCTAGACCCACCACCTACATCTTCGGATGCAAGGAAGTTCCTNNNNNNNNNNNNNNNNNNNNNNNNNNNNNNNNNNNNNNNNNNNNNNNNNNNNNNNNNNNNNNNNNNNNNNNNNNNNNNNNNNNNNNNNNNNNNNNNNNNNNNNNNNNNNNNNNNNNNNNNNNNNNNNNNNNNNNNNNNNNNNNNNNNNNNNNNNNNNNNNNNNNNNNNNNNNNNNNNNNNNNNNNNNNNNNNNNNNNNNNNNNNNNNNNNNNNNNNNNNNGCAAAGAAGTGCCTCCTTATCCTCCCTGACTGCTAGGACCCACCCGGTCG	0	0	0	0	0	0	0	0	0	0	0	0	0	0	0	0.280546	0	0	0	0	0	0	0	0	0	0	0	0	0	0	0	0	0	0	0	0	0	0	0	0	0	0	0	0	0	0
221	NODE_39248_length_320_cov_0.526316_g38529_i0	320	TTGGAATTTAGATGCATTAAATATTTGTACATTAGTTTGATTTCTTTCTCNNNNNNNNNNNNNNNNNNNNNNNNNNNNNNNNNNNNNNNNNNNNNNNNNNNNNNNNNNNNNNNNNNNNNNNNNNNNNNNNNNNNNNNNNNNNNNNNNNNNNNNNNNNNNNNNNNNNNNNNNNNNNNNNNNNNNNNNNNNNNNNNNNNNNNNNNNNNNNNNNNNNNNNNNNNNNNNNNNNNNNNNNNNNNNNNNNNNNNNNNNNNNNNNNNNNNNNNNNNNTTCTTTCTCTTTAAGAAAAATAAATGTTTGATCTAACAAGGAATAAATGC	0	0	0	0	0	0	0	0	0	0	0	0	0	0	0	0	0	0	0	0	0	0	0	0	0	0	0	0	0	0	0	0	0	0	0	0	0	0.157241	0	0	0	0	0	0	0	0
222	NODE_39266_length_320_cov_0.522807_g38547_i0	320	TTATATCAAATCAAGTCCAAAGTCGACTCGGATTTTGCTGGAATTCGTTCNNNNNNNNNNNNNNNNNNNNNNNNNNNNNNNNNNNNNNNNNNNNNNNNNNNNNNNNNNNNNNNNNNNNNNNNNNNNNNNNNNNNNNNNNNNNNNNNNNNNNNNNNNNNNNNNNNNNNNNNNNNNNNNNNNNNNNNNNNNNNNNNNNNNNNNNNNNNNNNNNNNNNNNNNNNNNNNNNNNNNNNNNNNNNNNNNNNNNNNNNNNNNNNNNNNNNNNNNNNNATTCAAAATTATTTAAGCAAATTAAAGGTTTTAAAAACCTGTATCTCAAG	0	0	0	0	0	0	0	0	0	0	0	0	0	0	0	0	0	0	0	0	0	0	0	0	0	0	0	0	0	0	0	0	0	0	0	0	0	0.157874	0	0	0	0	0	0	0	0
223	NODE_39268_length_320_cov_0.522807_g38549_i0	320	GATCCCCGGGATTGCCGTCCCGTTCACGGCCTTGAGCTGATGGGACGCGTNNNNNNNNNNNNNNNNNNNNNNNNNNNNNNNNNNNNNNNNNNNNNNNNNNNNNNNNNNNNNNNNNNNNNNNNNNNNNNNNNNNNNNNNNNNNNNNNNNNNNNNNNNNNNNNNNNNNNNNNNNNNNNNNNNNNNNNNNNNNNNNNNNNNNNNNNNNNNNNNNNNNNNNNNNNNNNNNNNNNNNNNNNNNNNNNNNNNNNNNNNNNNNNNNNNNNNNNNNNNNNNNNGAGCCGTGGAACTGCTTCCACGTCAGGTGCGTCTCGCCCAACCGG	0	0	0	0	0	0	0	0	0	0	0	0	0	0	0	0	0	0	0	0	0	0	0	0	0	0	0	0	0	0	0	0	0	0	0	0	0	0.180021	0	0	0	0	0	0	0	0
224	NODE_39270_length_320_cov_0.522807_g38551_i0	320	TTTTAAATTATTCATTTCAAATTGAGGTGACACATTAATTAAGAAAAATANNNNNNNNNNNNNNNNNNNNNNNNNNNNNNNNNNNNNNNNNNNNNNNNNNNNNNNNNNNNNNNNNNNNNNNNNNNNNNNNNNNNNNNNNNNNNNNNNNNNNNNNNNNNNNNNNNNNNNNNNNNNNNNNNNNNNNNNNNNNNNNNNNNNNNNNNNNNNNNNNNNNNNNNNNNNNNNNNNNNNNNNNNNNNNNNNNNNNNNNNNNNNNNNNNNNNNNNNNNNTTAAATGTTGTTTACATTTTAATTTGAAGAAAAAAGTAATTAATGTAAAA	0	0	0	0	0	0	0	0	0	0	0	0	0	0	0	0.279984	0	0	0	0	0	0	0	0	0	0	0	0	0	0	0	0	0	0	0	0	0	0	0	0	0	0	0	0	0	0
225	NODE_39271_length_320_cov_0.522807_g38552_i0	320	AACGACATATTCAGATCAGACATGATATAGTTAAACAGTTGTTGAAACATNNNNNNNNNNNNNNNNNNNNNNNNNNNNNNNNNNNNNNNNNNNNNNNNNNNNNNNNNNNNNNNNNNNNNNNNNNNNNNNNNNNNNNNNNNNNNNNNNNNNNNNNNNNNNNNNNNNNNNNNNNNNNNNNNNNNNNNNNNNNNNNNNNNNNNNNNNNNNNNNNNNNNNNNNNNNNNNNNNNNNNNNNNNNNNNNNNNNNNNNNNNNNNNNNNNNNNNNNNNNGACAAGAAAAATATTCTTGAAATGTCAACGGAAATGAAGTTAAAACTCAT	0	0	0	0	0	0	0	0	0	0	0	0	0	0	0	0.279984	0	0	0	0	0	0	0	0	0	0	0	0	0	0	0	0	0	0	0	0	0	0	0	0	0	0	0	0	0	0
226	NODE_39275_length_320_cov_0.519298_g38556_i0	320	CATGCGCCAAGTTGGACGTTGTATAAATCAAGAGTTTGGGGACTCCGCCTNNNNNNNNNNNNNNNNNNNNNNNNNNNNNNNNNNNNNNNNNNNNNNNNNNNNNNNNNNNNNNNNNNNNNNNNNNNNNNNNNNNNNNNNNNNNNNNNNNNNNNNNNNNNNNNNNNNNNNNNNNNNNNNNNNNNNNNNNNNNNNNNNNNNNNNNNNNNNNNNNNNNNNNNNNNNNNNNNNNNNNNNNNNNNNNNNNNNNNNNNNNNNNNNNNNNNNNNNNNNTGCTGACAGGGACGACGGAGACTGGGTCACCTGGATGGCACATGTGGCAC	0	0	0	0	0	0	0	0	0	0	0	0	0	0	0	0	0	0	0	0	0	0	0	0	0	0	0	0	0	0	0	0	0	0	0	0	0	0.157874	0	0	0	0	0	0	0	0
227	NODE_39277_length_320_cov_0.519298_g38558_i0	320	TAAACATGAGGGACTCATGACACACCAGAAGACCCTTATCAAGCCACTCTNNNNNNNNNNNNNNNNNNNNNNNNNNNNNNNNNNNNNNNNNNNNNNNNNNNNNNNNNNNNNNNNNNNNNNNNNNNNNNNNNNNNNNNNNNNNNNNNNNNNNNNNNNNNNNNNNNNNNNNNNNNNNNNNNNNNNNNNNNNNNNNNNNNNNNNNNNNNNNNNNNNNNNNNNNNNNNNNNNNNNNNNNNNNNNNNNNNNNNNNNNNNNNNNNNNNNNNNNNNNTACTCACCAATCCGAGAACGTTATCTGGGAGGGAACCAAAACTTAAAAAT	0	0	0	0	0	0	0	0	0	0	0	0	0	0	0	0.279423	0	0	0	0	0	0	0	0	0	0	0	0	0	0	0	0	0	0	0	0	0	0	0	0	0	0	0	0	0	0
228	NODE_39280_length_320_cov_0.515789_g38561_i0	320	GCAGGCTGCCGTCCAGCAAACCGCTCCAAGTCGTGTCGAGCACCGCCAGGNNNNNNNNNNNNNNNNNNNNNNNNNNNNNNNNNNNNNNNNNNNNNNNNNNNNNNNNNNNNNNNNNNNNNNNNNNNNNNNNNNNNNNNNNNNNNNNNNNNNNNNNNNNNNNNNNNNNNNNNNNNNNNNNNNNNNNNNNNNNNNNNNNNNNNNNNNNNNNNNNNNNNNNNNNNNNNNNNNNNNNNNNNNNNNNNNNNNNNNNNNNNNNNNNNNNNNNNNNNNTGGCTGTCGACCCATTCCTGAGCCGTCGCCACTTGCCACAGGGCCAGCAG	0	0	0	0	0	0	0	0	0	0	0	0	0	0	0	0	0	0	0	0	0	0	0	0	0	0	0	0	0	0	0	0	0	0	0	0	0	0.156925	0	0	0	0	0	0	0	0
229	NODE_39289_length_320_cov_0.512281_g38570_i0	320	GTGGCTACGCTCATTCCGCCGGGATGGTGGTAACCGCCACCGGTTTCGCTNNNNNNNNNNNNNNNNNNNNNNNNNNNNNNNNNNNNNNNNNNNNNNNNNNNNNNNNNNNNNNNNNNNNNNNNNNNNNNNNNNNNNNNNNNNNNNNNNNNNNNNNNNNNNNNNNNNNNNNNNNNNNNNNNNNNNNNNNNNNNNNNNNNNNNNNNNNNNNNNNNNNNNNNNNNNNNNNNNNNNNNNNNNNNNNNNNNNNNNNNNNNNNNNNNNNNNNNNNNTGCGCCAGCGTCTGCTGCCGGCCGCCCTGACGACGGCCCTGCATCAGGGCG	0	0	0	0	0	0	0	0	0	0	0	0	0	0	0	0	0	0	0	0	0	0	0	0	0	0	0	0	0	0	0	0	0	0	0	0	0	0.156925	0	0	0	0	0	0	0	0
230	NODE_39291_length_320_cov_0.512281_g38572_i0	320	TTCTGGTGTTACGTATGCTCTTTGGGTAAGAACTCTAGCCCATAAGGTAGNNNNNNNNNNNNNNNNNNNNNNNNNNNNNNNNNNNNNNNNNNNNNNNNNNNNNNNNNNNNNNNNNNNNNNNNNNNNNNNNNNNNNNNNNNNNNNNNNNNNNNNNNNNNNNNNNNNNNNNNNNNNNNNNNNNNNNNNNNNNNNNNNNNNNNNNNNNNNNNNNNNNNNNNNNNNNNNNNNNNNNNNNNNNNNNNNNNNNNNNNNNNNNNNNNNNNNNNNNNNTATACTAGTTTTTTGCATCCCAAGACCACCCAAGTTTTTGGGTTGGGTGA	0	0	0	0	0	0	0	0	0	0	0	0	0	0	0	0.271568	0	0	0	0	0	0	0	0	0	0	0	0	0	0	0	0	0	0	0	0	0	0	0	0	0	0	0	0	0	0
231	NODE_39292_length_320_cov_0.512281_g38573_i0	320	CTGCCGCATGTCAGCGTGGAGCGCGACGATTTCGGCAACCTGATCGCCCGNNNNNNNNNNNNNNNNNNNNNNNNNNNNNNNNNNNNNNNNNNNNNNNNNNNNNNNNNNNNNNNNNNNNNNNNNNNNNNNNNNNNNNNNNNNNNNNNNNNNNNNNNNNNNNNNNNNNNNNNNNNNNNNNNNNNNNNNNNNNNNNNNNNNNNNNNNNNNNNNNNNNNNNNNNNNNNNNNNNNNNNNNNNNNNNNNNNNNNNNNNNNNNNNNNNNNNNNNNNNGCCTCCCGACGGACAGCCCGGTGAATGGACGTTCCTCGGCGGTGTGCCGT	0	0	0	0	0	0	0	0	0	0	0	0	0	0	0	0.275496	0	0	0	0	0	0	0	0	0	0	0	0	0	0	0	0	0	0	0	0	0	0	0	0	0	0	0	0	0	0
232	NODE_39297_length_320_cov_0.512281_g38578_i0	320	TGGCGCAGCTGGCACCGCTCGCGGTGCTCATCCCGTTCCTCGGTGCGGCTNNNNNNNNNNNNNNNNNNNNNNNNNNNNNNNNNNNNNNNNNNNNNNNNNNNNNNNNNNNNNNNNNNNNNNNNNNNNNNNNNNNNNNNNNNNNNNNNNNNNNNNNNNNNNNNNNNNNNNNNNNNNNNNNNNNNNNNNNNNNNNNNNNNNNNNNNNNNNNNNNNNNNNNNNNNNNNNNNNNNNNNNNNNNNNNNNNNNNNNNNNNNNNNNNNNNNNNNNNNNCCGCAACAGGCTCCAGCGCACCGTGACCGTGGGGGCCATGGCACTGACGC	0	0	0	0	0	0	0	0	0	0	0	0	0	0	0	0.27774	0	0	0	0	0	0	0	0	0	0	0	0	0	0	0	0	0	0	0	0	0	0	0	0	0	0	0	0	0	0
233	NODE_39302_length_320_cov_0.508772_g38583_i0	320	TGTTACTTTGGTTTAGGGAATAAAGATGGGGAAGAAAAATAGTCAATTTANNNNNNNNNNNNNNNNNNNNNNNNNNNNNNNNNNNNNNNNNNNNNNNNNNNNNNNNNNNNNNNNNNNNNNNNNNNNNNNNNNNNNNNNNNNNNNNNNNNNNNNNNNNNNNNNNNNNNNNNNNNNNNNNNNNNNNNNNNNNNNNNNNNNNNNNNNNNNNNNNNNNNNNNNNNNNNNNNNNNNNNNNNNNNNNNNNNNNNNNNNNNNNNNNNNNNNNNNNNNAGACTATCATTTAGGCAGAATGATATTATTCAAGGTATTGGTGATCCAAA	0	0	0	0	0	0	0	0	0	0	0	0	0	0	0	0	0	0	0	0	0	0	0	0	0	0	0	0	0	0	0	0	0	0	0	0	0	0.15819	0	0	0	0	0	0	0	0
234	NODE_39304_length_320_cov_0.508772_g38585_i0	320	ACCAGGAGAACATTTCACCACCCATCATTTATATATGTCCTGTGTCGATTNNNNNNNNNNNNNNNNNNNNNNNNNNNNNNNNNNNNNNNNNNNNNNNNNNNNNNNNNNNNNNNNNNNNNNNNNNNNNNNNNNNNNNNNNNNNNNNNNNNNNNNNNNNNNNNNNNNNNNNNNNNNNNNNNNNNNNNNNNNNNNNNNNNNNNNNNNNNNNNNNNNNNNNNNNNNNNNNNNNNNNNNNNNNNNNNNNNNNNNNNNNNNNNNNNNNNNNNNNNNAAGTAAGAAGATACCATTTCTAGGCTTAATAAATCCTACACCTCTTTGGC	0	0	0	0	0	0	0	0	0	0	0	0	0	0	0	0	0	0	0	0	0	0	0	0	0	0	0	0	0	0	0	0	0	0	0	0	0	0.15819	0	0	0	0	0	0	0	0
235	NODE_39305_length_320_cov_0.505263_g38586_i0	320	GGTGTTGATTCCTACATTATACCACATAACTATTCTGTACCACCAGTGGTNNNNNNNNNNNNNNNNNNNNNNNNNNNNNNNNNNNNNNNNNNNNNNNNNNNNNNNNNNNNNNNNNNNNNNNNNNNNNNNNNNNNNNNNNNNNNNNNNNNNNNNNNNNNNNNNNNNNNNNNNNNNNNNNNNNNNNNNNNNNNNNNNNNNNNNNNNNNNNNNNNNNNNNNNNNNNNNNNNNNNNNNNNNNNNNNNNNNNNNNNNNNNNNNNNNNNNNNNNNNTGTACCACCAGTTGTGTATCCTACATTATACCACATCACTATTCTGTACC	0	0	0	0	0	0	0	0	0	0	0	0	0	0	0	0	0	0	0	0	0	0	0	0	0	0	0	0	0	0	0	0	0	0	0	0	0	0.155976	0	0	0	0	0	0	0	0
236	NODE_39307_length_320_cov_0.505263_g38588_i0	320	TAGCCAAGATTCTTAATGTCACCCAACCTTCGGTGGTTCAAATGCTACATNNNNNNNNNNNNNNNNNNNNNNNNNNNNNNNNNNNNNNNNNNNNNNNNNNNNNNNNNNNNNNNNNNNNNNNNNNNNNNNNNNNNNNNNNNNNNNNNNNNNNNNNNNNNNNNNNNNNNNNNNNNNNNNNNNNNNNNNNNNNNNNNNNNNNNNNNNNNNNNNNNNNNNNNNNNNNNNNNNNNNNNNNNNNNNNNNNNNNNNNNNNNNNNNNNNNNNNNNNNNAATGGAAATGACTCTTGAAGGCGAGAAGATAGGGGAGAGAATGATCAGGA	0	0	0	0	0	0	0	0	0	0	0	0	0	0	0	0	0	0	0	0	0	0	0	0	0	0	0	0	0	0	0	0	0	0	0	0	0	0.155976	0	0	0	0	0	0	0	0
237	NODE_39310_length_320_cov_0.505263_g38591_i0	320	CAAGGTGCCTAGTCTCCTCGAAGCGGCACTCAAGGCGTGCTACAACACATNNNNNNNNNNNNNNNNNNNNNNNNNNNNNNNNNNNNNNNNNNNNNNNNNNNNNNNNNNNNNNNNNNNNNNNNNNNNNNNNNNNNNNNNNNNNNNNNNNNNNNNNNNNNNNNNNNNNNNNNNNNNNNNNNNNNNNNNNNNNNNNNNNNNNNNNNNNNNNNNNNNNNNNNNNNNNNNNNNNNNNNNNNNNNNNNNNNNNNNNNNNNNNNNNNNNNNNNNNNNTACCAAATCCGAGGGCTGCTGGACCGAGCAGCGCGACAAAAGTATTCGGG	0	0	0	0	0	0	0	0	0	0	0	0	0	0	0	0	0	0	0	0	0	0	0	0	0	0	0	0	0	0	0	0	0	0	0	0	0	0.156292	0	0	0	0	0	0	0	0
238	NODE_39311_length_320_cov_0.505263_g38592_i0	320	TATAAAAGAAAAGAGGCATATTATGTGTTTAGTGAGGCAAGTATGTTTCCNNNNNNNNNNNNNNNNNNNNNNNNNNNNNNNNNNNNNNNNNNNNNNNNNNNNNNNNNNNNNNNNNNNNNNNNNNNNNNNNNNNNNNNNNNNNNNNNNNNNNNNNNNNNNNNNNNNNNNNNNNNNNNNNNNNNNNNNNNNNNNNNNNNNNNNNNNNNNNNNNNNNNNNNNNNNNNNNNNNNNNNNNNNNNNNNNNNNNNNNNNNNNNNNNNNNNNNNNNNNTGTGATGATTTCTGAAGCTAAGGAAAGTTAAGGATAATATATATTAAAGG	0	0	0	0	0	0	0	0	0	0	0	0	0	0	0	0.276618	0	0	0	0	0	0	0	0	0	0	0	0	0	0	0	0	0	0	0	0	0	0	0	0	0	0	0	0	0	0
239	NODE_39316_length_320_cov_0.501754_g38597_i0	320	TGAACTGGCTGCATGGAGTGTGCTCGAGGATGGTGGCGACGGTGATATGANNNNNNNNNNNNNNNNNNNNNNNNNNNNNNNNNNNNNNNNNNNNNNNNNNNNNNNNNNNNNNNNNNNNNNNNNNNNNNNNNNNNNNNNNNNNNNNNNNNNNNNNNNNNNNNNNNNNNNNNNNNNNNNNNNNNNNNNNNNNNNNNNNNNNNNNNNNNNNNNNNNNNNNNNNNNNNNNNNNNNNNNNNNNNNNNNNNNNNNNNNNNNNNNNNNNNNNNNNNNTATCTGGCCAGCCCTGCTCTCCGGAGAGCCGCCGAGCGAGATGTCGTCGG	0	0	0	0	0	0	0	0	0	0	0	0	0	0	0	0	0	0	0	0	0	0	0	0	0	0	0	0	0	0	0	0	0	0	0	0	0	0	0	0	0	0	0	0	0	0
240	NODE_39317_length_320_cov_0.501754_g38598_i0	320	TTCCCTCCCCCTCTCTGCCCGTGAAATCGCCTCTTCTCACCTCAAACTAGNNNNNNNNNNNNNNNNNNNNNNNNNNNNNNNNNNNNNNNNNNNNNNNNNNNNNNNNNNNNNNNNNNNNNNNNNNNNNNNNNNNNNNNNNNNNNNNNNNNNNNNNNNNNNNNNNNNNNNNNNNNNNNNNNNNNNNNNNNNNNNNNNNNNNNNNNNNNNNNNNNNNNNNNNNNNNNNNNNNNNNNNNNNNNNNNNNNNNNNNNNNNNNNNNNNNNNNNNNNNGAAGCGATGGATAATGTCGTCAAAGCTATCGAGAGCGTTAAGGCTAGGAA	0	0	0	0	0	0	0	0	0	0	0	0	0	0	0	0	0	0	0	0	0	0	0	0	0	0	0	0	0	0	0	0	0	0	0	0	0	0.15819	0	0	0	0	0	0	0	0
241	NODE_39320_length_320_cov_0.498246_g38601_i0	320	GATGTGGTTCAGCATTCTGTGCTGTAACAAGCCTTCCACGGAATTCTGATNNNNNNNNNNNNNNNNNNNNNNNNNNNNNNNNNNNNNNNNNNNNNNNNNNNNNNNNNNNNNNNNNNNNNNNNNNNNNNNNNNNNNNNNNNNNNNNNNNNNNNNNNNNNNNNNNNNNNNNNNNNNNNNNNNNNNNNNNNNNNNNNNNNNNNNNNNNNNNNNNNNNNNNNNNNNNNNNNNNNNNNNNNNNNNNNNNNNNNNNNNNNNNNNNNNNNNNNNNNNTTAATCCGTGGTTTCATCCTTCAAGTAGAATAGCACAGTCTAAAACTACC	0	0	0	0	0	0	0	0	0	0	0	0	0	0	0	0	0	0	0	0	0	0	0	0	0	0	0	0	0	0	0	0	0	0	0	0	0	0.156292	0	0	0	0	0	0	0	0
242	NODE_39321_length_320_cov_0.498246_g38602_i0	320	TGGGAGAAGTGCCTCTTGGACGTGTCGACAGACATGGTGAGTCGACTATTNNNNNNNNNNNNNNNNNNNNNNNNNNNNNNNNNNNNNNNNNNNNNNNNNNNNNNNNNNNNNNNNNNNNNNNNNNNNNNNNNNNNNNNNNNNNNNNNNNNNNNNNNNNNNNNNNNNNNNNNNNNNNNNNNNNNNNNNNNNNNNNNNNNNNNNNNNNNNNNNNNNNNNNNNNNNNNNNNNNNNNNNNNNNNNNNNNNNNNNNNNNNNNNNNNNNNNNNNNNNTGGTGTCTCCAGCATAAGAGATGGACCCAATCCATTCCAGTCCCTTCCCT	0	0	0	0	0	0	0	0	0	0	0	0	0	0	0	0	0	0	0	0	0	0	0	0	0	0	0	0	0	0	0	0	0	0	0	0	0	0.155659	0	0	0	0	0	0	0	0
243	NODE_39325_length_320_cov_0.498246_g38606_i0	320	AGAGGAAGGGGCTGTCAAATTGAATATTCTCCATATTTGTCTCCACGTAGNNNNNNNNNNNNNNNNNNNNNNNNNNNNNNNNNNNNNNNNNNNNNNNNNNNNNNNNNNNNNNNNNNNNNNNNNNNNNNNNNNNNNNNNNNNNNNNNNNNNNNNNNNNNNNNNNNNNNNNNNNNNNNNNNNNNNNNNNNNNNNNNNNNNNNNNNNNNNNNNNNNNNNNNNNNNNNNNNNNNNNNNNNNNNNNNNNNNNNNNNNNNNNNNNNNNNNNNNNNNCGAGTATCTCGACACGCATTCCTACCGTTGCGGGTAGGCTAGCGCCGCGG	0	0	0	0	0	0	0	0	0	0	0	0	0	0	0	0	0	0	0	0	0	0	0	0	0	0	0	0	0	0	0	0	0	0	0	0	0	0.15819	0	0	0	0	0	0	0	0
244	NODE_39331_length_320_cov_0.494737_g38612_i0	320	CGTCGGAGGCCGAAGCCGTAGCCATCTAGTAGCGTCGCACGGAAGCCGAGNNNNNNNNNNNNNNNNNNNNNNNNNNNNNNNNNNNNNNNNNNNNNNNNNNNNNNNNNNNNNNNNNNNNNNNNNNNNNNNNNNNNNNNNNNNNNNNNNNNNNNNNNNNNNNNNNNNNNNNNNNNNNNNNNNNNNNNNNNNNNNNNNNNNNNNNNNNNNNNNNNNNNNNNNNNNNNNNNNNNNNNNNNNNNNNNNNNNNNNNNNNNNNNNNNNNNNNNNNNNGGGATGAAACACGCAATCCGAATTAGCTGCACACGCCGCAACCTGAAGGT	0	0	0	0	0	0	0	0	0	0	0	0	0	0	0	0	0	0	0	0	0	0	0	0	0	0	0	0	0	0	0	0	0	0	0	0	0	0.155027	0	0	0	0	0	0	0	0
245	NODE_39334_length_320_cov_0.491228_g38615_i0	320	GCAGACGCGGCTCGGCACGACCGTTCAGGGTTACCCCGTGACCTTCAGCGNNNNNNNNNNNNNNNNNNNNNNNNNNNNNNNNNNNNNNNNNNNNNNNNNNNNNNNNNNNNNNNNNNNNNNNNNNNNNNNNNNNNNNNNNNNNNNNNNNNNNNNNNNNNNNNNNNNNNNNNNNNNNNNNNNNNNNNNNNNNNNNNNNNNNNNNNNNNNNNNNNNNNNNNNNNNNNNNNNNNNNNNNNNNNNNNNNNNNNNNNNNNNNNNNNNNNNNNNNNNCGCCAGTACGTGGCGGTGACGACCGGCGCGTCGAGCGGCGGGAGTCCGCG	0	0	0	0	0	0	0	0	0	0	0	0	0	0	0	0	0	0	0	0	0	0	0	0	0	0	0	0	0	0	0	0	0	0	0	0	0	0.154077	0	0	0	0	0	0	0	0
246	NODE_39338_length_320_cov_0.491228_g38619_i0	320	GTCGATCTGCACGTGCGTCACCTCCGTCGAGCGTGCCGGGATCCTCTCTCNNNNNNNNNNNNNNNNNNNNNNNNNNNNNNNNNNNNNNNNNNNNNNNNNNNNNNNNNNNNNNNNNNNNNNNNNNNNNNNNNNNNNNNNNNNNNNNNNNNNNNNNNNNNNNNNNNNNNNNNNNNNNNNNNNNNNNNNNNNNNNNNNNNNNNNNNNNNNNNNNNNNNNNNNNNNNNNNNNNNNNNNNNNNNNNNNNNNNNNNNNNNNNNNNNNNNNNNNNNNACTTCACCATAGTCCACCCGCGGGGGCAGCATCACTCGCATGAGTGACAC	0	0	0	0	0	0	0	0	0	0	0	0	0	0	0	0	0	0	0	0	0	0	0	0	0	0	0	0	0	0	0	0	0	0	0	0	0	0.155027	0	0	0	0	0	0	0	0
247	NODE_39343_length_320_cov_0.491228_g38624_i0	320	GTTTAGTGTTTCAACTTTATCATGAGATCTGTTTAATAGATTGGACAATTNNNNNNNNNNNNNNNNNNNNNNNNNNNNNNNNNNNNNNNNNNNNNNNNNNNNNNNNNNNNNNNNNNNNNNNNNNNNNNNNNNNNNNNNNNNNNNNNNNNNNNNNNNNNNNNNNNNNNNNNNNNNNNNNNNNNNNNNNNNNNNNNNNNNNNNNNNNNNNNNNNNNNNNNNNNNNNNNNNNNNNNNNNNNNNNNNNNNNNNNNNNNNNNNNNNNNNNNNNNNGAAATGTGTCCCTCATTATCCGCTTTCAAATAAGTCTTGGCATCGATAAT	0	0	0	0	0	0	0	0	0	0	0	0	0	0	0	0	0	0	0	0	0	0	0	0	0	0	0	0	0	0	0	0	0	0	0	0	0	0.157874	0	0	0	0	0	0	0	0
248	NODE_39344_length_320_cov_0.491228_g38625_i0	320	GATTTACTATTTTTTAAATTATTATCTATTATTTTGCTATCTGGTTATCTNNNNNNNNNNNNNNNNNNNNNNNNNNNNNNNNNNNNNNNNNNNNNNNNNNNNNNNNNNNNNNNNNNNNNNNNNNNNNNNNNNNNNNNNNNNNNNNNNNNNNNNNNNNNNNNNNNNNNNNNNNNNNNNNNNNNNNNNNNNNNNNNNNNNNNNNNNNNNNNNNNNNNNNNNNNNNNNNNNNNNNNNNNNNNNNNNNNNNNNNNNNNNNNNNNNNNNNNNNNNTCTACGAGATAATGTGGTAATAAATTTTATATTTTACCCATTTTTTCAAC	0	0	0	0	0	0	0	0	0	0	0	0	0	0	0	0.279984	0	0	0	0	0	0	0	0	0	0	0	0	0	0	0	0	0	0	0	0	0	0	0	0	0	0	0	0	0	0
249	NODE_39348_length_320_cov_0.487719_g38629_i0	320	AATTGCAAACGCGCGATCTTGACCGAATCGTCCAGCGAGTGTGCCGCTTGNNNNNNNNNNNNNNNNNNNNNNNNNNNNNNNNNNNNNNNNNNNNNNNNNNNNNNNNNNNNNNNNNNNNNNNNNNNNNNNNNNNNNNNNNNNNNNNNNNNNNNNNNNNNNNNNNNNNNNNNNNNNNNNNNNNNNNNNNNNNNNNNNNNNNNNNNNNNNNNNNNNNNNNNNNNNNNNNNNNNNNNNNNNNNNNNNNNNNNNNNNNNNNNNNNNNNNNNNNNNTGCCTCCCGCAAGTCGCTTGGGAGACGTGACCGTGCGGGTGATACTTTTT	0	0	0	0	0	0	0	0	0	0	0	0	0	0	0	0	0	0	0	0	0	0	0	0	0	0	0	0	0	0	0	0	0	0	0	0	0	0	0	0.143297	0	0	0	0	0	0
250	NODE_39350_length_320_cov_0.487719_g38631_i0	320	GCTATCCAACGGAGATTTCGCAGGGTTTAAATTACGCCCAGCCGGTATTGNNNNNNNNNNNNNNNNNNNNNNNNNNNNNNNNNNNNNNNNNNNNNNNNNNNNNNNNNNNNNNNNNNNNNNNNNNNNNNNNNNNNNNNNNNNNNNNNNNNNNNNNNNNNNNNNNNNNNNNNNNNNNNNNNNNNNNNNNNNNNNNNNNNNNNNNNNNNNNNNNNNNNNNNNNNNNNNNNNNNNNNNNNNNNNNNNNNNNNNNNNNNNNNNNNNNNNNNNNNNGGGTCCGCGACTCTCGTCGCACAGCGTCTTATTGGCCTCATGAACACGTC	0	0	0	0	0	0	0	0	0	0	0	0	0	0	0	0	0	0	0	0	0	0	0	0	0	0	0	0	0	0	0	0	0	0	0	0	0	0.154077	0	0	0	0	0	0	0	0
251	NODE_39356_length_320_cov_0.484211_g38637_i0	320	TCCATCCGACTATCGGTCTTGCGTCTCTGGATTCGCACTTTGACCTACTTNNNNNNNNNNNNNNNNNNNNNNNNNNNNNNNNNNNNNNNNNNNNNNNNNNNNNNNNNNNNNNNNNNNNNNNNNNNNNNNNNNNNNNNNNNNNNNNNNNNNNNNNNNNNNNNNNNNNNNNNNNNNNNNNNNNNNNNNNNNNNNNNNNNNNNNNNNNNNNNNNNNNNNNNNNNNNNNNNNNNNNNNNNNNNNNNNNNNNNNNNNNNNNNNNNNNNNNNNNNNCTTATCCAGATCTTGATCACCCAATTTCTCAATATCCGCAACCTCCCTCC	0	0	0	0	0	0	0	0	0	0	0	0	0	0	0	0	0	0	0	0	0	0	0	0	0	0	0	0	0	0	0	0	0	0	0	0	0	0.157874	0	0	0	0	0	0	0	0
252	NODE_39365_length_320_cov_0.480702_g38646_i0	320	GTATGGTCACCAGTATGGTAATCTCCAACTGGGGAAGAATGACATGCTTCNNNNNNNNNNNNNNNNNNNNNNNNNNNNNNNNNNNNNNNNNNNNNNNNNNNNNNNNNNNNNNNNNNNNNNNNNNNNNNNNNNNNNNNNNNNNNNNNNNNNNNNNNNNNNNNNNNNNNNNNNNNNNNNNNNNNNNNNNNNNNNNNNNNNNNNNNNNNNNNNNNNNNNNNNNNNNNNNNNNNNNNNNNNNNNNNNNNNNNNNNNNNNNNNNNNNNNNNNNNNTATGATATTGTCAGCATATCATCGAAAAAATATGGCTTGTCCCAGAAGTA	0	0	0	0	0	0	0	0	0	0	0	0	0	0	0	0.280546	0	0	0	0	0	0	0	0	0	0	0	0	0	0	0	0	0	0	0	0	0	0	0	0	0	0	0	0	0	0
253	NODE_39369_length_320_cov_0.477193_g38650_i0	320	AAAAATCGTTCCCGCCCTTAGTCACACAATAATAGACAGTCGTGTCCTCGNNNNNNNNNNNNNNNNNNNNNNNNNNNNNNNNNNNNNNNNNNNNNNNNNNNNNNNNNNNNNNNNNNNNNNNNNNNNNNNNNNNNNNNNNNNNNNNNNNNNNNNNNNNNNNNNNNNNNNNNNNNNNNNNNNNNNNNNNNNNNNNNNNNNNNNNNNNNNNNNNNNNNNNNNNNNNNNNNNNNNNNNNNNNNNNNNNNNNNNNNNNNNNNNNNNNNNNNNNNNGGCCCTCAGGCTACTCGTTTGCAGATAGAGGGAGTTCCTGGAAGTGTCTC	0	0	0	0	0	0	0	0	0	0	0	0	0	0	0	0	0	0	0	0	0	0	0	0	0	0	0	0	0	0	0	0	0	0	0	0	0	0.152812	0	0	0	0	0	0	0	0
254	NODE_39370_length_320_cov_0.477193_g38651_i0	320	GGGGGAGCCGACCGCTATATTGGGTTTTTTCCTGTTTTCACTCATTGGAATNNNNNNNNNNNNNNNNNNNNNNNNNNNNNNNNNNNNNNNNNNNNNNNNNNNNNNNNNNNNNNNNNNNNNNNNNNNNNNNNNNNNNNNNNNNNNNNNNNNNNNNNNNNNNNNNNNNNNNNNNNNNNNNNNNNNNNNNNNNNNNNNNNNNNNNNNNNNNNNNNNNNNNNNNNNNNNNNNNNNNNNNNNNNNNNNNNNNNNNNNNNNNNNNNNNNNNNNNNNAATCAGGACTACCTGATCAGGCACGGTCATCTTGCCAAGTGTAGTTTTGT	0	0	0	0	0	0	0	0	0	0	0	0	0	0	0	0	0	0	0	0	0	0	0	0	0	0	0	0	0	0	0	0	0	0	0	0	0	0.153128	0	0	0	0	0	0	0	0
255	NODE_39371_length_320_cov_0.477193_g38652_i0	320	GCAGCTTGTCGTTCGAATTGGCGAGTTGCTGTTGCAGCAGTTCGAGCTGCNNNNNNNNNNNNNNNNNNNNNNNNNNNNNNNNNNNNNNNNNNNNNNNNNNNNNNNNNNNNNNNNNNNNNNNNNNNNNNNNNNNNNNNNNNNNNNNNNNNNNNNNNNNNNNNNNNNNNNNNNNNNNNNNNNNNNNNNNNNNNNNNNNNNNNNNNNNNNNNNNNNNNNNNNNNNNNNNNNNNNNNNNNNNNNNNNNNNNNNNNNNNNNNNNNNNNNNNNNNNCGTTCGACATCGCGCTGCTTCAGCTCGACGCCCTGGCGCGCGAGTTCGAG	0	0	0	0	0	0	0	0	0	0	0	0	0	0	0	0	0	0	0	0	0	0	0	0	0	0	0	0	0	0	0	0	0	0	0	0	0	0.157874	0	0	0	0	0	0	0	0
256	NODE_39372_length_320_cov_0.477193_g38653_i0	320	ACATCTTGGTGTAATCTAAAAGTGAGGAGAATCATGCTAATCACCTTTGANNNNNNNNNNNNNNNNNNNNNNNNNNNNNNNNNNNNNNNNNNNNNNNNNNNNNNNNNNNNNNNNNNNNNNNNNNNNNNNNNNNNNNNNNNNNNNNNNNNNNNNNNNNNNNNNNNNNNNNNNNNNNNNNNNNNNNNNNNNNNNNNNNNNNNNNNNNNNNNNNNNNNNNNNNNNNNNNNNNNNNNNNNNNNNNNNNNNNNNNNNNNNNNNNNNNNNNNNNNNTTCTAAGTGTGAATTTTAGTTTAGTGTCGTAACTTTCCTTGGACATGTTT	0	0	0	0	0	0	0	0	0	0	0	0	0	0	0	0.277179	0	0	0	0	0	0	0	0	0	0	0	0	0	0	0	0	0	0	0	0	0	0	0	0	0	0	0	0	0	0
257	NODE_39656_length_317_cov_0.485816_g38937_i0	317	TGAAGTTGAAAGGATGGTCTGGTTAGAAGAGGTTGGTTTTCTGTAAACACNNNNNNNNNNNNNNNNNNNNNNNNNNNNNNNNNNNNNNNNNNNNNNNNNNNNNNNNNNNNNNNNNNNNNNNNNNNNNNNNNNNNNNNNNNNNNNNNNNNNNNNNNNNNNNNNNNNNNNNNNNNNNNNNNNNNNNNNNNNNNNNNNNNNNNNNNNNNNNNNNNNNNNNNNNNNNNNNNNNNNNNNNNNNNNNNNNNNNNNNNNNNNNNNNNNNNNNNNNNNTTTTACTTTTAGACTAATGTAGTGTCAAGTCCAAAATGTTTATTTTA	0	0	0	0	0	0	0	0	0	0	0	0	0	0	0	0	0	0	0	0	0	0	0	0	0	0	0	0	0	0	0	0	0	0	0	0	0	0.16863	0	0	0	0	0	0	0	0
[truncated: 88 more columns]

## Sheet: Gagliardi2018
	contig	length	fasta	SRR6246136	SRR6246146	SRR6246152	SRR6246142	SRR6246145	SRR6246139	SRR6246141	SRR6246151	SRR6246149	SRR6246135	SRR6246147	SRR6246143	SRR6246153	SRR6246137	SRR6246148	SRR6246144	SRR6246138	SRR6246154	SRR6246150	SRR6246140	dataset
0	NODE_2856_length_426_cov_7.838875_g2771_i0	426	CAGTTTTCGTCCACATGCAAAATTCAGTAACACGAGCACCCGAATCGTCGAAGGTCACTACCCAAATACACAAGCGACTGAAATGATTTATGGACTGCTGGATTCGGTGCGAAATTCCCCACAATCTGATCCCTAATTCATGACCACTGGCCAGAGGGGGGAAAGTTGAAATGCGACCTCATGGGGCGAGCCACTTTTCGCACCCCGTAAGCTGACACCGGTGGCAGCAGCGGCATGCTCAAAGCTGCAATCTACTCCGTAAAGGCCAGCTAAAAATCCCTGAAGGCATGATAAGAGTGAGAAATTGCAAACAATTTAATACCAATTTTGAAGAGATTTCATCTACTGGAAAAAAGTTATAAAGAAATGAAATGTCAGGAATCCCCCAGTTTTCGTCCA…	0	0.605995	3.78597	0	0	0	0	0.571102	0	0.317276	1.36048	0	0.20671	0	1.23175	0	0.591769	0.17374	0.552385	0.219442	Gagliardi2018
1	NODE_6674_length_324_cov_2.840830_g6584_i0	324	GGTTATTATTAATAAAATTCCTTACCAAACCAGCTATAAACCACGGATTAAAACTTGTTCACGAAACCTTGACGCTCTCTCTAGTACTATTTACTCTTAGCTCGATACTCTCTACAATACCTCTCTTTTTTCATTTTCGACGTTATTTTCGATCTATCGCACACTGCTCAACGTCCTCATAAACCACTAACGTGGCCACCACGAACCCCTACGTGAGTAGCTGAATCGAATAAATCTACGAATAACACGCCACTGTTAGCTTCGCCTTTGCTAATCAGTCCAGGGCGTCCAAGAAAAACTCACACCTATTTACCAATTAGCTAG	0	0	0	0	0	0	0	0	1.19277	0	0	2.06481	0	0	0	0	0	0	0	0	Gagliardi2018
2	NODE_9910_length_285_cov_18.380000_g9820_i0	285	GTCCACCTGCTCACCACCTAGTTCGTGAATCTCAAGCTCAGTTCTGCTATCCCTGCATTAGCGAAGTACCCTGTATTCGTTGCTCATTTACATGCCTCACGCAGTCCCAGGATTCTCAGGAACCTGTGTTCTATGCATTGCTGCACAGACTACATGTTCGCTTCACACTTGGCTAAGGACAGAACAATCAACACTTTGTTGAAACACGAGTGCTAAGCTGCTGACAAACATTCTCACCCTTGCGCTGCTACCAAACCATGTAGTTACAGATACGATGGCGAGTCG	0	0	0	0	0	0	0	0	3.20235	0	0	17.0842	0	0	0	0	0	0	0	0	Gagliardi2018
3	NODE_12222_length_267_cov_4.581897_g12132_i0	267	TTTATTACCCTGTTATCCCCGGCGTAACTAATCTAATGAAAGTGAACCTTGGCCGGTTTTCACTGTTCAATATAACCTTCTTACAAATCTTTTCGAAGTACCCCTCGAATAAGTTAAGCTTAAAAGCTATTAGCTAGTAGATCTTATAAATTTTTAGGTATCCATCCTAATATTAGTAAGCCTTTGTTTGCCTCTGTTACTTTTTAAAAGGCTACCGTCCCAGTCAAGCAGATCCCTGATCGAGTATATGTAATACAACATATATTT	0	0	0	0	0	0	3.59309	0	0	0	0	0	0	0	0	0	0	0	0	0	Gagliardi2018
4	NODE_13197_length_261_cov_2.557522_g13107_i0	261	TGGAATTTTCAGTGATAGTGTTTTTCATCACTATTTTACATTACTCATATCAGCATAATTAATTTTGATTTCTCCTTTTGAAATTATTTTACAAAAATCATTGAATCACAAAACATTCTGTTACCTTTTAAATATAACTTCGGTTTTATTTTTAAGTCTCTGTACATTTAGAACCATTCATTTCTAACCTCAGTGAGCATTTACGCTTTCCTTTGAAGATGTCTGCTTCCAAGACCACATCCTAAGCAGATCGGAAGAGCA	0	0	0	0	0	0	0	0	0.314167	0	0	2.70881	0	0	0	0	0	0	0	0	Gagliardi2018
5	NODE_14583_length_253_cov_4.495413_g14493_i0	253	CGGGAAGCCAGCCCTGCAAAGCCAAGTCCTATAGCATCCGTTTGTGATGTCTGTAGGCAATGATTAACGATGTGGATTTATTCCCACTGGGCAATTTATTGCATTTAACCATTCGGAGATCCGTCTCGATAGTGGCGAGTTTTCGAACTTGCTCTTTTGATGATAGTCTTCACCTAGGATCATGACTCAAGTCTCTTGGCATTCGTGTCAAGCTCGGACTTGGAGATTGTATCCAAAACTAGTGAGATCGGGG	0	0	0	0	0	0	3.44225	0	0	0	0	0	0	0	0	0	0	0	0	0	Gagliardi2018
6	NODE_15332_length_249_cov_5.836449_g15242_i0	249	CTTATGAACCCTAATTCTTATTTTAGAGTAGCTAACTAAGATATGATCATGGAATGATTTAAACTCGTTTAATCATCTTCCTGAAATCATCTGGTATAAGCTAAGATCCTCTAGGGATTGCGAGAGCCGGTCTATGATCTTGGTGGGCACATATTCAATTCGATCTAAAGCTATATCGATCGATGCTCCTATAGAGTAATCGATCGACGGCAGATATATCGACCGACATAAGCTGTCAAACGTCGGACG	0	3.03112	3.02079	0	0	0	0	0	0	0	0.338467	0	0	0.191737	0	0	0.334134	0	0.365707	0	Gagliardi2018
7	NODE_18287_length_236_cov_6.278607_g18197_i0	236	CTCCTCCACATCACCACCGCCGTCGGTGTCCTGCTGGATCTCCAGCGGGTCTTTTTCGTCCATCGACGCCGAGTGACGCTTGTTGTTTCGCACCACATTCTCCTCATCAATCTCGATTTCCGGTTCCATGTTTACGTCCAATTCTTTCTTCTCACTCGGCTTTTTGATCTTTCGCATCCTTCACCCACTTTTCACTCAAGTCTGTCACAAAATTCGAGCGCGAAATTTTGTGTTTG	0	0	3.32537	0	0	0	0	0	0	0	0.302768	0	0	0	1.87441	0	0	0	0	0	Gagliardi2018
8	NODE_18876_length_234_cov_2.874372_g18786_i0	234	TAATTACAAAAAATGGAGTCTAATATTACCTTGCGTCAAAAAGTACCACGATATATGACATCGAGCATTACAAAAAATGGAGTTTAAGATTACCTAGCATCAAAGAGTGTCACGATATATGACATCAAACATTACAAAAATGAAGTTTTATCTTACCTTGCATCAAATAATGTCACGATAAATGTCATCGAGCATTACAAAAAATGAAGTTTAAGATTACCTTGCATCAAAGAG	0.330783	0.206514	0.193896	0.840774	0	0	0	0	0	0	1.73557	0	0.397911	0.244834	0	0.243145	0	0	0	0	Gagliardi2018
9	NODE_30293_length_203_cov_3.702381_g30203_i0	203	GTAAGACGCCTAGGATTCGTGGTTTTGAATGGACTTACAGAATTTTGCCGCAGACCACAACCTCCCTTCACCGGTACATGGACTTATAAAATGCCTTGCTAATTCTCGGTGACTCTAATAGAAGACTGACTGATCGGGTCTATCTTATTATTTGCGCAAATACCCCCCTAATGGCGAGGATCAAGTCGCCTAGGGAACGATAA	0	0	0	0	0	0	0	0	0	0	0	0	0	0	0	0	0	0.333642	0	0	Gagliardi2018
10	NODE_41110_length_185_cov_12.093333_g41020_i0	185	AGTTTTGTGTGCTAAATATATCTTTTATAGGATAAGCTTTGTAGTTTTTCTGACTACTTTATTTCGTCAAGTTTCCTACTTATACAATAAACTAAGTAAAGGTGTTTCAATTGTATCTTATCAACTACCTTATACGCTACAACTTGTTCCATTGTATCCAATAACTACAAACAGTAAAGCTGCAT	0	0	7.95537	0	0	0	0	0	0	0	0	0	0	0	0.268303	0	0	0	0	0	Gagliardi2018
11	NODE_41649_length_185_cov_3.160000_g41559_i0	185	GCCACGAAACCATGCGGCTCGGTTAAAGGATCTGGCAAATTTCCAGGCCCAAAATCAGCCGTTTAGACCCTCAAACGGCTGTTTAAAGTTACGGACCTTAAAAAAGTGTCTTGTTAAGATTTTTCCCACTTTCATGCGTCGTTTTACATATCAATCGCGTTGCTCTCTATACGCAGCGTGAATAG	0	1.28888	0	0	0	0	0	0.327282	0	0	0	0	0	0	0.238819	0	0	0.445364	0	0	Gagliardi2018
12	NODE_41885_length_184_cov_12.664430_g41795_i0	184	CTCGCTTTTAGGGCTATACTTCCAAATAACCCGACTCTTGGAATACTAAGGTCAAAATTAGTCGTTAATTTAGCCTCCCGTTACGAGTATGTCACTCTCTATGTAGTCTAATTCAATAGAACTTACGGGTACGCCACGACAAAATAGCCAAAGCATCTATATAATACACTTCCAACTCCCAAAA	0	0	8.32225	0	0	0.294968	0	0	0	0	0	0	0	0	0	0	0	0	0	0	Gagliardi2018
13	NODE_42507_length_184_cov_2.751678_g42417_i0	184	ATTTAGTGTTATTTATCTAACGAGGAACGTACCTGGATTTTTTCTCACAGACTTATATGATTAACAATTAAGTCTAGATAACATTAGATCGCTAAAAGGATCGATCACTAGAATTACTAAGGACGAATAATAAACTTGGTAGATTATTACAAGGGTAGTGTAGAAAGACCGACCCGACTCAGTG	0.632801	0	0	0	0	0	0	0	0	0	3.33236	0	0	0	0	0	0	0	0	0	Gagliardi2018
14	NODE_44057_length_182_cov_3.176871_g43967_i0	182	CTTTAGATATATTTTAACAATTTATGTGGTAGCAGAATACTCAATGTGTCGTGAGTTATTTCGTAAGAAATGATGGAGAGAGTTGAGGCAAGCATATTGGTATTAGTAAAGGAAACAATGAAAAACATTGTCGCCAAAAGTCCAAGGTTTCTAATACACGTGATCAACATTATTAGATTAAT	0	0	0	0	0	0	0	0	0	0	0	0	2.56196	0	0	0	0	0	0	0	Gagliardi2018
15	NODE_44745_length_181_cov_4.924658_g44655_i0	181	TCTTCCGATCTCTATAAAAACTATATTTTATAAAGAAACAGAAACTTATAGGGTCTCAAACCTTTTTAAATTTCATATTATTTCAGTAAATAATGAAGCTACGCAATAAAACAAAATTGCCAAATTTTCAAAATTTTCTTGAAATTTGTGGGTTAACCTCTGCGAAAAGATTGAGTTTTCC	0	0.400478	0	0	0	0	0.311036	1.66953	0	1.82263	0	0	0.354914	0	1.4013	0	1.11239	0	0	0	Gagliardi2018
16	NODE_46165_length_179_cov_11.006944_g46075_i0	179	CTACGATGAGGCTACGTGAGCGGACACTGGGGCACTATGATTAGGCTAGGTGAGTGCACAGTGGGACACTGATGAGGCCGGGTGAGCGCACATTGTGACACTATGATGGGGCTAGCTGACTGCACACTGCAACACTATGATGTGGCTAGGTGAGGTCACACTGGAGCACTATGATGGGG	0.340022	0	0	0.811249	0.958923	0.745232	0	0	0.74489	0	0	0.726257	0.407268	0.2845	0	0.840906	0.469448	0	0.533905	0.386989	Gagliardi2018
17	NODE_46890_length_179_cov_2.055556_g46800_i0	179	GCCTAGTCTGATTGGTCTTTCACCTCTAAGCACAGCTCAATAGAGCTTTTTGCAACAAGCACCTATTCGGTCTAATTTCCTGGCCATGCCTAGATCACTAGGCTTCGGGTTGAGGGATAAACTACGTAATTCGTTCTCACAAAACATCAAGTCTACCTATCCCCCTCCCCCACTTACCC	0	0	0	0	0	0	0.324139	0	0	0	0	0	0	0	0	0	0	0	0	0	Gagliardi2018
18	NODE_46930_length_179_cov_1.611111_g46840_i0	179	AGATGTTCCTATTTCAAAGAAAATAGAGATTTAATAAGGGTTAGTCTATTGATTAGGCGGTATATGAAATTTCAATATATTACTCGTTAAAAAATTAGAAATGATCCCTTTGTACCATGAAAATAATTTTAGCATAAAATAATACATATTTAGAACATTGCTGGATATTTTTAAACAAC	0.975716	0	0	0	0	0	0	0	0	0	0	0	0	0	0.274249	0	0	0	0	0	Gagliardi2018
19	NODE_47172_length_178_cov_7.706294_g47082_i0	178	GGCCACAGTTACCTCGACTGAAAGCCTAACCACCGACAGTGGTTACCCAAGGCAGAGTGATAGCATACACGACACCGAACTCCTTCATCGAAAGAGCACATCCTCATAAATGAGAAACTTGAAGCGACAATAGAGAGGGAAGACTACACTCACTGCTTACAATGCGAACCCAGGTCTA	0	0	7.97748	0	0	0	0	0	0	0	0	0	0	0	0	0	0	0	0	0	Gagliardi2018
20	NODE_47516_length_178_cov_4.041958_g47426_i0	178	CGTCTGGTCAGACGACTTAGAATTAAGTCTTCCAGACGACTTTAAACTAAGTCGTCTGGAATTGTTTTGCCTCTTACGGAACCAAGGAGACCTAAACCTACTTTCAGATGGAGCCTAATGCAAGTAAGAAGGTCTAGAAGGCAATTTGAATCTCTTGGAGCCGTTAGAGGAAGAGGCA	0.516616	0	0	0	0	0	0	0	0	0	0.401423	0	0	0	1.59345	0	0	0	0	0	Gagliardi2018
21	NODE_49755_length_176_cov_1.808511_g49665_i0	176	ATGAAGTAGTTGAAGCTAATTGGTCTATGTTAAGGTTAAATAGAAGAATGACACATACAACTTGCTTTATACTATTTTAAGGCAAGTTGGATGTTTCTTTACACCTAAGTATAAGCTAGGATCATAAAACATACAATATTCCATAATTATAAAAAGATTAAAGGTTATCTTAAGGC	0	0	0	0	0	0.564735	0	0	0	0	0	0	0	0	0	0	1.03999	0	0	0	Gagliardi2018
22	NODE_50976_length_174_cov_11.856115_g50886_i0	174	GTTTCCGAGGAAGAAATTTTGTCGACCCGAGGGCACCGAGGGGCGCAATTCTTCCGAGATGCTGAAAAGTCCAATTTCAATACAATGTTGAACAATATTTTACATTCTGAGCAAAAATAATAGCAAAAAATCGCAATTAAAGTGTGTCATCTAGTAATCATTGGAAATGACAAT	0	0	5.05216	0	0	0	0	0	0	0	0	0	0	0	0	0	0	0	0	0	Gagliardi2018
23	NODE_59366_length_167_cov_6.310606_g59276_i0	167	ATCTACCTAAATATTCTATAAGGAAATATATTTGAACTTTTTAATATCTTAACCTAAATGCGAAAATGGTGCCCTGTAAAGATAGATTATACTGGCATAGATCGTTTGTACAACAGTTAATAATGATGTCGAGCTCTTAATTGAAGTATAAGCGTAAAAGACTCGGG	0	0	2.75932	0	0	0	0	0	0	0	0	0	0	0	0	0	0	0	0	0	Gagliardi2018
24	NODE_61338_length_166_cov_2.526718_g61248_i0	166	GATACACATCATGTGTAATCGATTGACGACGCTTCATTAGAAGACGACGAATAAAGATACCCCATCGGTCGATGTACACCTAGTACCATCGGTCGAAGATTAGTTGGACTTAGCCGACTTGAAGCCCAAGTTCTCTCATTATTACAAGATCGCCCCTGACAAATTT	0	0	0	0	0	0	0	0	0	2.16946	0	0	0	0	0	0	0	0	0	0	Gagliardi2018
25	NODE_61535_length_166_cov_1.557252_g61445_i0	166	CGGGAACATTGGTGGTGGTGGTGACGAGTACATCGAGCCCAAGATTGGTGGGAGGATGAAGTCGTCGCTTGGCATTGGTGGAGAAGGAACGGGAGGAGGAGGAGATTGAACTGGTGTCGGGGGTGGTGAAAGGACGGGAGCAGGAGGAGATGGAACAGGTGTTGGT	0	0	0	0	0	0	0	0	0	0	0	0	0	0	0	0	0	0.837046	0	0	Gagliardi2018
26	NODE_63725_length_164_cov_4.240310_g63635_i0	164	CAAAAGAGAAGTTTCTTAAACTCAATCTATTTCAATTCATTTTGATGCATTTCCCATTAAAGCTTGAGAGTGTTATCTAAAATGGTTGAATGGATAGTTACTTGTGTGATCAATCCAATTGCCATTGCTTGTGCATTAGTCTAAGATTCATCATTGTTATCTTG	0	0	0	0	0	0	0.388814	0	0	0	0	0	0	0	2.34145	0	0	0	0	0	Gagliardi2018
27	NODE_65126_length_163_cov_4.617188_g65036_i0	163	TGCCTACAAGCAATACGAAGAACATTCTCTTTAATCGGATTATATTCTTCCTTCCGGTCAATGATTCCGGTGTGCCAAGTATACTGAGTCGATTTATCGAGGATTTATACTAGGTAATTGAAGTAGACGGTATTCGAGACCTAGTCTCCTACCCGAAGGCAAC	0	0	0	0	0	0	0	0	0	0	0	0	0.606659	0	1.76686	0	0	0	0	0.429101	Gagliardi2018
28	NODE_65688_length_163_cov_2.531250_g65598_i0	163	AAAAATGAAGTTTAAGATTACCTTGCATCAAAGAGTGTGACGAAGTGTGACATTAACCATAACTAAAAATGGAGTTTAAGATTACTTTGCATCAAAGAGTGTCACGAAGTGTGACATTAACCATAACTAAAAATGAAGTTTAAGATTACCTTGCATCAAAGAG	0	0	0	0	0.385036	0	0	0	0	0	1.07156	0	0	0	0	0	0	0.381247	0	0.474487	Gagliardi2018
29	NODE_66398_length_162_cov_6.094488_g66308_i0	162	GCAACATCTTCCTCATCACTCACAGGCCCAGGAGGGGCAGGCACAGCTCTGTTGACTTCCATCTTCTCCTCCAACCCCATGGTCAGGGAGAGCTCCAGGCATGTGTATCTACAAGATGAGAGACCAAAGCTCACCTCACTGCCTTCCCCTCCCCTCTTTCCC	0	2.07239	0	0	0	0	0	0	0	0	0	0	0	0.444026	0	0	0	0	0.840375	0	Gagliardi2018
30	NODE_68490_length_161_cov_3.571429_g68400_i0	161	GCCGCCGACGGATGGGCGGGGCGCGCTGGCCGGTGCGGGTGCCGAGGCGGCGGTGGTTGGCGCGGACTGCGCCGAGGCGGCGACGCTCAGCAGCATGGCGGCGGCAGCTGCCAGGATTCCTTGGGTGACGGATGTCTTCACGGCATTGACCTCGCGACGTG	0	0	1.4663	0	0	0	0	0	0	0	0	0	0	0	0	0	0	0.659208	0	0	Gagliardi2018
31	NODE_69608_length_160_cov_5.880000_g69518_i0	160	GTGGCGGTGGTGCAGCTGTGGAGGATAAAAAAGCCGGTTTGATTAATGGGCACAAAGAGGAGGAGGTCGAGGCTAATGGAAATGGCGAACTGGAGAGGAAGGTGTCTGAAGAAGATGGAGAGGCGATGCCAGAAGTAATGGAGATTGTCCAGGATGTGGG	0	0	3.7219	0	0	0	0	0	0	0	0.488569	0	0	0	0	0	0	0	0	0	Gagliardi2018
32	NODE_74342_length_157_cov_12.721311_g74252_i0	157	CCCGTTTCAATATGTTCTTCTATATTCAGTTAGAAAATATGAAGCATCTATTATCTTTCCCTCGCGGTACTTATTCACTATCGCTGGACTCGCATATTTAGTCTTGAGGAAGGTACCTCTTATTCACAAAACGCGAATTACTTATCACAGACTTACA	0	0	7.19318	0	0	0	0	0	0	0	0	0	0	0	0	0	0	0	0	0	Gagliardi2018
33	NODE_75638_length_157_cov_2.672131_g75548_i0	157	CAAAAGGTAAAAAAGTTTTTATTGCTGTGCGAAAATACGGCAATTTAAAATTTCTGATTTTCCATTTTTGCATTTCTATGCTTTTTCATCGATAACGCGCTCTAGGCGGCTACTCTCTTTTTCAACTTTTCCTTCACAGTACTACTTCACTATCGTT	0	0	0	0	0	0	0	0	0	0	0	2.35032	0	0	0	0	0	0	0	0	Gagliardi2018
34	NODE_77183_length_156_cov_3.380165_g77093_i0	156	GCCATTACTTTAAAACTCTATTTTTTATTCTTTCTCCTATTACTAAGATGATTCAATTTATTATTTTATAATAAAAATAACAGCTTCTGCCAACATATATAAATCAAAGCTGCTTCTGGTTAAAAACCTATACTACTCAAATATCTAGAAATCCAT	0	0	0	0	0	0	0	0	1.95167	0	0	1.59615	0	0	0	0	0	0	0	0	Gagliardi2018
35	NODE_79658_length_154_cov_127.117647_g79568_i0	154	TTTGTGCCGTTTTGAGGGGGCTCAGAGCAAATTAATTAGAAAATAACATTTAAACCTATGCGACTAGAATCGAATACTGATTGGGTATCGCTCATTTCTAATCTAAGAAAAACTGTCTATTCTAATTTTACATCTATAAAGAAGACCCAACTAG	2.01047	6.54014	28.9051	1.31303	0.461549	0	0.380489	2.29822	2.13444	6.75568	2.22474	0.603896	3.36524	0	11.1038	0	1.56674	1.78187	2.72235	0.956396	Gagliardi2018
36	NODE_80653_length_154_cov_4.008403_g80563_i0	154	ACGCTCTTCCGATCTGCCTTAAGCGTGTGTAAGTTTTATTTCTCGCTTAGCTGTCGCCAGCGATTATTAATTATAAATGTAGCTAACGAGCGACGCGGTTTCACCACGACTCGTTCACCAGGGATTTGACTTTATCCGGTCCTCTCGTACTAGG	0	0	0	0	0	0	0	0	0	0	0	3.95455	0	0	0	0	0	0	0	0	Gagliardi2018
37	NODE_82917_length_153_cov_2.771186_g82827_i0	153	TGGACCAATAAATTTATTTAATTAACGAGTTTAAACACAAGTAACTGTTTAGGCGAAATTTATCTGAAAATTATAGTTAATTAGATAAAACCCGAAGCTGAATGAGCTAACTATGAACAGGCTGAAAAATGCTTAAAACCGTTTGAAGGGCCG	0	0	0	0	0	0	0	0	0	0	0	0	1.80212	0	0	0	0	0	0	0	Gagliardi2018
38	NODE_85852_length_151_cov_5.120690_g85762_i0	151	CTATAAAATTTTATTTTCTAAAGAAATAGAAACTTATAGGGTCTCAAACCATTTTAAATTACATACTATTTCAGTAAATAATGAAGCTATGCAATAAAACAAAATTGCCAAATTTTCAACTTTTTCTTGAAATATGTGGGTTAACCTTTAC	0	0	0	0	0	0	0	0	0	1.08354	2.86347	0	0	0	2.27934	0	0	0	0	0	Gagliardi2018
39	NODE_89948_length_149_cov_6.859649_g89858_i0	149	TGAAAATGTTTTTATAAAACATATCTGGCTGTCGATAGCCCGTATTTTGATATATGCGACAGAAGGCAATGACGGCCGCATGGGAGTCTGTACTTTGTCATAATATCGAATATCGACAAATTTATTTTTTACCTCGAAACATACTGTGC	0.204242	0	0	0	0	0	0	0	0	0	4.02086	0	0	0	0	0	0	0	0	0	Gagliardi2018
40	NODE_91953_length_148_cov_14.654867_g91863_i0	148	AAGAATTCAAAAGAGATTCTATGATTAACGTGAGTGAAAGTAGAAGAGCCTTATAATGTCAAATGGTAGATAAACTGTTTAAATTTTACGGGGAACCTTCCTCGAAGGCTAAATATAATACATACACGATAGTGTAAAGTACCGTGAG	0	0	10.907	0	0	0	0	0	0	0	0	0	0	0	1.06142	0	0	0	0	0	Gagliardi2018
41	NODE_97274_length_146_cov_14.396396_g97184_i0	146	CGCATAAACCGTCTACTAGCAACTGTTTCCCGGGTTAAATGGTAAAAACCATTTAACCCCTCTTCCTTTTTGGATAAGTAATGTAGATTTTACCTACTTACTTTACTCTTCCATCGACCAATTTTACTTGGTCGAAGTAGTTTGTA	0	0	6.03078	0	0	0	0	0	0	0	0	0	0	0	0.511828	0	0	0	0	0	Gagliardi2018
42	NODE_97604_length_146_cov_7.117117_g97514_i0	146	CTTATGTGGTGATTACCCGCCATGTCATGGCTTACGGCATCGAGCTTAACTGAATGCCGCATTACGGACGCGTGACGTTAAAAAGTCTCAGCAACAGGTCTGGTGAAATACAGAGGCTCGCGTTCAACTAGGCTGGTATCATGTAG	0	0	3.30188	0	0	0	0	0	0	0	0	0	0	0	0	0	0	0	0	0	Gagliardi2018
43	NODE_98085_length_146_cov_4.594595_g97995_i0	146	CTTGCATCAAAGTGTCACGATATATGACATCGAGTATTACAAAAAATGGAGTTTAAGATTACCTTGTATCAAAGAGTATCATGATATATGACATCGAGCATTACAAAAAATATAGTTTAAGATTACATTGCATCAAAGAGTGTCAC	0	0	0	0	0	0	0	0	0	0	4.42138	0	0	0	0	0	0	0	0.599005	0.502097	Gagliardi2018
44	NODE_101700_length_145_cov_2.200000_g101610_i0	145	TCATGTCGAGATCTTCCACCATTTTCAAAAATCGGGATTTTTGCCTTACTATTTACTAACACCTATGAGCTTCTAGTTCATTGGGAGCACGTCCGCCTTTCGCAGAGTGTAACCCTTTTACCTAGAATAAGTAGGGTGCGAACAG	0	0	0	0	0	0.383323	0	0	0	0	0.951868	0	0	0	0	0	0	0	0	0	Gagliardi2018
45	NODE_101723_length_145_cov_2.145455_g101633_i0	145	CGATATTGGAAATATCTCAACATCTATAACTCATTTCGCTATCCCGCTACCTAGGTTAGTCATCTACCATAGTTATACACCTGTGTTGCGAAAATCAACCCATTCTGAGAACTTTCATTTTTCGACCGTTTTGACTTTTACCGAG	0	0	0	0	0	0	0	0	0	0	0	0	0	0.509255	0	0	0	0	0	0	Gagliardi2018
46	NODE_102245_length_144_cov_12.165138_g102155_i0	144	CGCTAAACAAGAAGAGAAAACTCTCTCGTAATGCACTATTAACGTCGTCTATCATAACGTGTTACCACTGCTAAACACCAAGACTAAGCTAATGAATCTTAACATTATTCCCTTTCGGTACTCGACGGTCAAAGAAAGTATAAA	0	0	8.53673	0	0	0	0	0	0	0	0	0	0	0	0	0	0	0	0	0	Gagliardi2018
47	NODE_105714_length_143_cov_4.203704_g105624_i0	143	CTCGAATCCTAGAGGGCAGGGGGTCACGCCTTCGCGGGTCGACGGCGCGCCAGACCCCACCCGATCAGCGCGCCGGCCACCAGCGTGGCACCCAAGGTCAGCCACAGCGGCGCCGTCAGGTTGAAGAACAGGAACTCCACGCG	0	0	3.54466	0	0	0	0	0	0	0	0	0	0	0	0	0	0	0	0	0	Gagliardi2018
48	NODE_107440_length_142_cov_12.785047_g107350_i0	142	CAACTTGATCACAAATCTAACTTTTCATCTCAATAATGGATTCCTAGTGGCCATCCTATATGTTGTCCACTACTACATAAATCTAGGGAATACTATGACCAAAATCTCTAACCATTTGCACCTCCTGAGAATTGTAGATATG	0	0	10.634	0	0	0	0	0	0	0	0	0	0	0	0	0	0	0	0	0	Gagliardi2018
49	NODE_107460_length_142_cov_12.345794_g107370_i0	142	GAGACCCGAATTCGACGTTTAGTGTTGCTTCTGACGGCACCGGCAGCGGCGGGGGACAAGGCAGCGGTTCAGGTCGCGGGCAAGGCAGCGGACGCGGAACAGGTGCAGGTAGTGGAGACGGTTCGGGCAACGGCAGCGGGAT	0	0	11.1782	0	0	0	0	0	0	0	0	0	0	0	0	0	0	0	0	0	Gagliardi2018
50	NODE_107489_length_142_cov_11.448598_g107399_i0	142	ATTTCTGAAAATGAGTACCATTTCAAATTAATATGACTCACAAAAATATCAACCAAGTACACATTTATTCAAAAGTCTGATAGTCTTTCACAGTAGAATTATCTTTATTTATCTGTCAAAACATGCTTTAGTGAGTAAAAAC	0	0	9.92505	0	0	0	0	0	0	0	0	0	0	0	0	0	0	0	0	0	Gagliardi2018
51	NODE_107577_length_142_cov_9.560748_g107487_i0	142	ATATACACATACATGGCTAGTGCTTTGCTTTGTTTTGCTTTCTTTTTAAGCCCTAGAAAGTAGAGTTGTCCTTTCCCATTAAGGTCCCCAAGTTCCCCTCTAGATGCCTGATCCCTGGAAAGCAACACACCCTCTCCACCCC	0	0	9.20614	0	0	0	0	0	0	0	0	0	0	0	0	0	0	0	0	0	Gagliardi2018
52	NODE_107622_length_142_cov_8.785047_g107532_i0	142	GGGGTGGCGGGGCTGGGTTGGCGTCCTGCCTCGGCGTCGACGGCTGGCTGGTGACGACGGGAGAGGAGCCGGCTGGGCCACGCCGGGCCCGGGAGCGGTTCGCGAGACGTATCACCCCTGGTAGCCGACAGCGTGGTCGGCC	0	0	8.4972	0	0	0	0	0	0	0	0	0	0	0	0	0	0	0	0	0	Gagliardi2018
53	NODE_107680_length_142_cov_8.102804_g107590_i0	142	AACGCTTCTGCTGTTGGTGGAGACGTGACCAAGGGGGCCGAAGACAGGGAGAAAAGCTTACAAAGCTGTCCGCTGTCTCCAAACCCCCAAGGTTTAGTCGTAGTCTAAGCAAAAGTCACTTAAAAACACTATAAAAAAGAAG	0	0	7.79826	0	0	0	0	0	0	0	0	0	0	0	0	0	0	0	0	0	Gagliardi2018
54	NODE_107945_length_142_cov_6.130841_g107855_i0	142	GGAAAAGGAATAGCTCTATGTGAACCGCTCAAACAACCATTCTAACCTAGATTCATGACGAGCAACTGTGTAAGCCCTCGGGCTTGTGCAGAAACGAGTAATGGGTCGAAAGAAGGGGTGGAGCACCTAGTGCAAGTGGGGG	0	0	2.99549	0	0	0	0	0	0	0	0	0	0	0	1.0909	0	0	0	0	0	Gagliardi2018
55	NODE_108181_length_142_cov_5.261682_g108091_i0	142	CCCCCCAACTCGCCCGCCTGGCCACCGGCCTCGCTCTCGCCGGTCTGCTGGCCAGCTGCGCCTCGACCGGCGGCCCCAGCTTGGCCGATGCCAGCCGCGCGCTTCGCGCGGATTCGGTCCAGGGCCTGAGCTTCACAGGCAC	0	0	4.96253	0	0	0	0	0	0	0	0	0	0	0	0	0	0	0	0	0	Gagliardi2018
56	NODE_108462_length_142_cov_4.345794_g108372_i0	142	AAAATTATATAATCTTACATAGAAAAGTCTCTGGATGCTCCAGGGGGATGCAACTGTCTATTTATTTCAGAGTTCAGTAGTGCCATTCAACTGGCCAGCTTCCCTAAGGACTTCAGTCCTGGAGCTACCCTGGGTCATTAGA	0	0	3.54466	0	0	0	0	0	0	0	0	0	0	0	0	0	0	0	0	0	Gagliardi2018
57	NODE_108664_length_142_cov_3.822430_g108574_i0	142	CTCCAATCGAACGTCCTTCCCTCATAACGATTCATCTATTTATCTCGTTCAAATTCCACTAACGTTAATAACAACAGTATTATGACACTAACTGCCCGGCTAGGGTGCACCCATAAAGCTTCTCTGGGTTTTTGGAGCTGAC	0	0	3.54466	0	0	0	0	0	0	0	0	0	0	0	0	0	0	0	0	0	Gagliardi2018
58	NODE_109236_length_142_cov_2.803738_g109146_i0	142	GGATATTCATGACATGCAATCCTTAGAACTGGAAAACTTTCTTCTAACTGATTACCCATACTGAGCGCTATTCAAATACTGTCAATTTGGTCCTATATGAAAATCCTCCTTCACTACACATTTCCATTCATTTATAGTCAAC	0	0	0	0	0	0	0	0	0	3.55684	0	0	0	0	0	0	0	0	0	0	Gagliardi2018
59	NODE_109538_length_142_cov_2.299065_g109448_i0	142	CCGGTTTTTCAAGGACCATGTTAAATACCCACGACCCAGTAAAGTGCTGAGCCTTTTCGAACTACAACATAACTAATTCCCCATATAACATGATTCCTTAGTCATGAAATTCTACCATCTACGTGAGACAGCTGAATCTATA	0	0	0	0	1.81051	0	0	0	0	0	0	0	0	0	0	0	0	0	0	0	Gagliardi2018
60	NODE_109588_length_142_cov_2.299065_g109498_i0	142	GAGCACGTTGCAGTGAATGAGGCAGGAAAGTGGCCAGAGGATGCGTGAAAGGGAACAGAGCGGATGCGATTCGCAAGGATGCTATGTACAAGCGAGGACGAGCAGCTAGTAGTAGTGACAGTGCTGAAGACTGCTGTGCGAC	1.9847	0	0	0	0	0	0	0	0	0	0	0	0	0	0	0	0	0	0	0	Gagliardi2018
61	NODE_110043_length_142_cov_1.532710_g109953_i0	142	CATCAATTAACTACAAGCAACCAAAAGACAAGGGAAAGAAAGAGACAAATCAGTGCAATGAAGAATATAAGTCTTTTCATTAATAAAGATTGAAGTTACATCGATCAGTAGAAAGAAAGTTTACAGACTGAAAAAAGCAAAA	0	0	0	0	0	0	0	0	0	0	0	0	0	1.27314	0	0	0	0	0	0	Gagliardi2018
62	NODE_110070_length_142_cov_1.532710_g109980_i0	142	ATCGAATCTGTGCTTTCAATAGGCAAGAAGCAGTCGGAAGAAATCTGTAAAATTAGAAATTAATATTTGATGTATCTGTGTAAAATTCAATGTCTCCAAATGTACCTCCATGCTAGTATTTAGCGATGATTTGGGCATTTCC	0	0	0	0	0	0	0	0	0	0	0	0	0	1.27314	0	0	0	0	0	0	Gagliardi2018
63	NODE_110081_length_142_cov_1.532710_g109991_i0	142	CTCAGAAGAAACATAGAAAAGAAAGCCCCAGACAAAGTAATAGGAGGAAGGAGAGACAGAAACGGTAAATGCGAAACCCGATGAACGACAAAAAGAATGAGTAAAGGAGAGACGCGGGTAAGAAAATGAATGACAACGAGAG	1.32313	0	0	0	0	0	0	0	0	0	0	0	0	0	0	0	0	0	0	0	Gagliardi2018
64	NODE_110103_length_142_cov_1.532710_g110013_i0	142	CACGGATCTCCATTTCTAGTTCTCCTCTTTGAATATTTAATATACTAATTCTTTCTAAAAGAAAAGAGATATATATCTCTATTTCGGGAATCTACTAAACATATGATGCCGCATATCTACAATATTCTATTCTATTAGAGGG	0	0	0	0	0	0	0	0	0	1.77842	0	0	0	0	0	0	0	0	0	0	Gagliardi2018
65	NODE_110237_length_142_cov_1.476636_g110147_i0	142	CAACGACGCCTACATCTCTAACAAGGTACGCAGTATCTTGGTGGACAACTGGGGCAAGATCGAAGTAGGTCTGTCGGAATCTCTGCAGTCTTTCGTAGCATCCGACAAAGAAAAAGCGATTGACTTCCTGTTGGACGAAGTG	0	0	0	0	0	0	0	0	0	1.80347	0	0	0	0	0	0	0	0	0	0	Gagliardi2018
66	NODE_110343_length_142_cov_1.149533_g110253_i0	142	GTCAATTCCGGATTCCGCGCAGCTTGACACGTGTTCAGCATAAGACGTTTAGCATCGCAGAGCGTAGAACCATTTGCGTAGACGATCCCAAGAGGATCCGAGCAGAGTAAGAGTTTAAGCAAGTCGATCGAAACAAAATTTG	0	0	0	0	0	0	0	0	0	0	0	0.774648	0	0	0	0	0	0	0	0	Gagliardi2018
67	NODE_110652_length_141_cov_11.377358_g110562_i0	141	CTTTGTTATTGACGGAAGACTATCATCGATAGTTTAGATCACAATTTTTTAACAATTTTCTATGACATTCAGAAGATTGTTAAAAATCACCATTGCATAAAATTTGCAAAACACACTGCACTTAACCAAAAGCAGATAGAG	0	0	10.6038	0	0	0	0	0	0	0	0	0	0	0	0	0	0	0	0	0	Gagliardi2018
68	NODE_110686_length_141_cov_10.566038_g110596_i0	141	ACCGCGCGCTGCTCGGCGTCGAAGGCCGCAGCCTCGGCGGCCAGATGGGCGACCGTGTCGACGGCACCGTGATCGGGCGACATCACCCAGCCTGACGCCCGCTGTTCGGAGAGCTTGCCCGCGGCCAGAGCCACCGGCTTC	0	0	7.71278	0	0	0	0	0	0	0	0	0	0	0	0	0	0	0	0	0	Gagliardi2018
69	NODE_110717_length_141_cov_10.103774_g110627_i0	141	CAAGCCCCTCCGGGACCTTGATTCCTTGTGACAAGTTAAGGCAAGTATTGAAGTTCCCTCAAGAACTTGTCTAGTACTAGGAGTTACTCTAAGTGATTGGCGGAGAGACGGAGGATCTATGATGCTTTCAGTTGGTTCCTG	0	0	9.90494	0	0	0	0	0	0	0	0	0	0	0	0	0	0	0	0	0	Gagliardi2018
70	NODE_111009_length_141_cov_7.679245_g110919_i0	141	GACGAACTACCATTGACCGGGAAAAGAACAAGGCTGAAGTTCAGATTTTTAATTTTGACCAGTAATAAAAAACATGATTTTAATTAAATAAGAAAGTATTAGAATTGGTTAAATAGCCCTATTTGAAGACATACATTTTAA	0	0	6.38039	0	0	0	0	0	0	0	0	0	0	0	0	0	0	0	0	0	Gagliardi2018
71	NODE_111487_length_141_cov_5.584906_g111397_i0	141	ACTAGTAGTTATATGTATAAGTTAATTAGTTTCTTGATAACTTATTTATTCATAAGTTGATTAAAAATAATTGCAGATATTATTTTTATTTTCTAAAAAATTACTAATGATATTATTAGTTTCTTATTAGTTTATAGATTC	0	0	7.79826	0	0	0	0	0	0	0	0	0	0	0	0	0	0	0	0	0	Gagliardi2018
72	NODE_111982_length_141_cov_4.358491_g111892_i0	141	TGTTGCACCGAGCAACTTCAACACCTGCTCCAGGTCCGCGACCCGCGACCACGGCCTTCAGTTCGCCCATCGCGTCGGCCGCCAGCTCCTCCGGCTCGGGCAACTCGTCGCCGTCCTCGGCACTCTCCTCCTTCAGCCACT	0	0	4.25359	0	0	0	0	0	0	0	0	0	0	0	0	0	0	0	0	0	Gagliardi2018
73	NODE_112249_length_141_cov_3.867925_g112159_i0	141	GTGCCCAAATTTCTCCTACAGTCAATCATAGAGACGATTGAAAAGGAGAGGGAGGGAAAACACCAACATTTAGCTCACCATGGCCTCATAAAATTGGTAGTGGTGGATGCTTTAAGAAATTTTGGGTCCCCTATTTTATGG	0	0	2.83573	0	0	0	0	0	0	0	0	0	0	0	0	0	0	0	0	0	Gagliardi2018
74	NODE_112355_length_141_cov_3.698113_g112265_i0	141	GGCCACGCTGCCCTCGATGCCGCCGATGGCCCAGGCCGCGGTCCGATCGTTGGTCGCCGCGGCGGCGGTGTGGGCCTGGTCGGCGTGGCGCGGCATCCCGCTCTTCCAGCGCGACGGCACGGGGGCGGCCGGCCTGCTCGC	0	0	3.54466	0	0	0	0	0	0	0	0	0	0	0	0	0	0	0	0	0	Gagliardi2018
75	NODE_113110_length_141_cov_2.650943_g113020_i0	141	GCCATTCAGAAGAGTAGTCAAGAGTCAGTCAGAAAACTGCTACACTTTTGCTACACTCCCCGCTTGACTAGATTAGATAGAACCTGTCATACAACAACATAGGTGGGATGCGTTCATATCCCTCTCTCTCCGCAATAAAGG	0	0	0	0	0	0	0	0	0	3.55684	0	0	0	0	0	0	0	0	0	0	Gagliardi2018
76	NODE_113189_length_141_cov_2.556604_g113099_i0	141	GCCTCATCATAGCGTTCCAGTGTGCGCTCACGTAGCCTCATCATAGTGCCCCAGTGTACACTCACCCGGCCTCATCATAGTTTCCCAGTGTGCGCTCACCCGGCCTCATGATAGTGCCCCAGTGTGCGCTCACCAGGCCTC	0.422276	0	0.351952	0.343295	0.488015	0.765207	0	0	0.42478	0	0.541411	0.680851	0.45048	0.34763	0.294002	0	0	0	0	0	Gagliardi2018
77	NODE_113366_length_141_cov_2.320755_g113276_i0	141	GTGGAGGCCAAGCACACCATAAGATGGGTTGTGCAAGAACTCCTGCATTTATTCGTAGCACATGAAGAATAGGAGGTGCCCGTCAACAATTTAGTTAAGCAATCCATTTAACTGTGGATGCTATCACGCGAAAATTGAGAC	0	0	0	0	0	0	0	0	0	2.66763	0	0	0	0	0	0	0	0	0	0	Gagliardi2018
78	NODE_113383_length_141_cov_2.320755_g113293_i0	141	ATCAGTGCCGCCAATGGCGCCACCCGGGTGGGTCAGGAAATCATTCATCCTGATCTGGTGGGAGTGAGAGCCGCCAATACCAAAGAACAGGCCCTTCACCAGGCTGATGCGGTAAGTGAGCGTGATAAGAGTTGATTGCTG	0	0	0	0	0	0	0	0	0	2.66763	0	0	0	0	0	0	0	0	0	0	Gagliardi2018
79	NODE_113418_length_141_cov_2.311321_g113328_i0	141	TGACAGTCACGTGCCGGACAGAAAAATTACCTTACCTAGGTAACGGAAGGCGCTGTCCTGGGAAGACCACCAAGAAATATTTTGATAGGCGACAGTTACCTAAGAAGAAGTTATCATTCGCCTGACGACAACTTAATCATC	0	0	0	0	0	0	0	0	0	0	0	0	0	1.90971	0	0	0	0	0	0	Gagliardi2018
80	NODE_113667_length_141_cov_2.056604_g113577_i0	141	ATCGGTGCCTTGGTTGGCGCCATTCCTGCTCTGAAGGGATTACCCATGCGCAACTTGCTAGCCGCTACGCTCGCAGTTCTGATGCATTTGGCCGCGCTCGCCGCGACGCCACAGACGGCCGTTCTCGACGTTCAGAACATG	0	0	0	0	0	0	1.72339	0	0	0	0	0	0	0	0	0	0	0	0	0	Gagliardi2018
81	NODE_114032_length_141_cov_1.547170_g113942_i0	141	ATAAGATCTTTTTCTTCACAGAATTTGAAATGCATTGCACCATACTTCTTACCATCGGTGAAGGCAATCATCATCTTTGCTGTAATAACAGCTTCTTGCGGTTTCAAACCTTTAACTTGTTTCAGCCCTGCTGCCATTGAG	1.32313	0	0	0	0	0	0	0	0	0	0	0	0	0	0	0	0	0	0	0	Gagliardi2018
82	NODE_114051_length_141_cov_1.547170_g113961_i0	141	ATGAATCACAAACATGCTAGCTACAGGCTATAGATCAAGGTCACAAGAGGGTCAAGTAATAAGTAAGACGATGTATATAAAAACTAACATCGCGAATGCGCGGAAATAAAACTAGATAATACGACCTGATACGGACTAACG	0	0	0	0	0	0	0	0	0	1.77842	0	0	0	0	0	0	0	0	0	0	Gagliardi2018
83	NODE_114117_length_141_cov_1.547170_g114027_i0	141	TTGGAAGAGGTATTTCCTAAAATATTCCTTTTTCCTCGTGTTGCCTTTTCCTTGAAACGTATGTAGTGCAAGAGAAGGTGCCTTTATTGCAATTGTATTTGAGTGGCTTCACTTTCATAAGGATATAAGAATGAGTTTAGC	0	0	0	0	0	1.30781	0	0	0	0	0	0	0	0	0	0	0	0	0	0	Gagliardi2018
84	NODE_114242_length_141_cov_1.443396_g114152_i0	141	GTCGCGCGACTGAGGCGAAGACGGTGGACGGCGTTCAGGTGTACATCCTGTCCGATCTGACCGTGCAGCTCCCGGTGTCCGTTGAGCCGGTGGTGGATGACGAGGTGCGGGTGGTTGAGTCGTTGACTGAGCCGCACCTGG	0	0	0	0	0	0	0	0	0	0	0	0	0	0	0	0	0	0.69824	0	0	Gagliardi2018
85	NODE_114413_length_140_cov_22.123810_g114323_i0	140	CGCCGCCTTGACGTCTGCCCCGTTTGGCATCGCTGGACGCTCAATTGCTTCATCCTTGGGCATCTGGTTCTGTTGGGCCAGTGCCATCGGCGCGCTTGCTCCGATCAGGCAGCACAAGGCGACTTTGACCACACCGTTTG	0	0	20.4932	0	0	0	0	0	0	0	0	0	0	0	0	0	0	0	0	0	Gagliardi2018
86	NODE_114479_length_140_cov_16.161905_g114389_i0	140	AAAAATTCGTACACTGTCTTGACAATGCTGTATCTCTCGCCTATGATACGATCCATGCAAGTGAGCGTTAGCGCTTGCACCTGGTCGAGGACCTAGGTTAAGGTCCGAGCGATTCCTCGCGTTCCCGTAGCCGGTACTCG	0	0	12.7608	0	0	0	0	0	0	0	0	0	0	0	0	0	0	0	0	0	Gagliardi2018
87	NODE_114523_length_140_cov_14.685714_g114433_i0	140	ATTTTTATATGCATGTATATTCGATCATGGGCATATCGAAAATCAAGCCAATTTTGGTATAATTTCAATGTATGGTTAATATAATATATTCTCCATGTATTTGTTTTCCGTATGGGCATATCGAAATTGTTAGTTTAAAT	0	0	15.9966	0	0	0	0	0	0	0	0	0	0	0	0	0	0	0	0	0	Gagliardi2018
[truncated: 1,051 more rows]

## Sheet: Brohawn2016
	contig	length	fasta	ALS10	ALS04	CTL08	ALS14	CTL24	CTL27	CTL23	ALS03	CTL25	ALS09	ALS01	ALS02	CTL16	CTL22	CTL06	dataset
[truncated: 9 more rows]

## Sheet: Ladd2017
	contig	length	fasta	ALS_03	CTL_15	ALS_04	CTL_06	CTL_16	CTL_08	ALS_02	CTL_13	ALS_01	CTL_07	dataset
[truncated: 7,704 more rows]

[truncated: 5 more sheets: Brohawn2019, Humphrys2016, Emanuel2020, VonSchack2018, Shin2014]
